# Supplementary material for: Derived variants at six genes explain nearly half of size reduction in dog breeds
Source: HighWire-hosted journal article supplement (doi:10.1101/gr.157339.113), 2013-09-11
Supplement: Supplemental_TableS2.xlsx [file Supplemental_TableS2.xlsx]

## Sheet: chr4_67Mb
Supplemental Table S2. SNPs, insertions and deletions identified by or selected for fine-mapping.
chr4:67Mb
Chromosome	Marker position	Left flanking sequence	Reference allele	/	Alternate allele	Right flanking sequence	rs number (dbSNP131)	Strand
chr4	66956100	TTTATCTTCTCCTAGACAAG	T	/	G	ACTTGGCTGCCTGTTCAGGC		+
chr4	66963299	CCCACAGAAGCCAGCACCAA	C	/	T	TGAAGCTGAAAATATAAGAC	rs24166004	+
chr4	66963304	AGAAGCCAGCACCAACTGAA	G	/	A	CTGAAAATATAAGACCAAAA		+
chr4	66963320	TGAAGCTGAAAATATAAGAC	C	/	T	AAAATGTGAAAATGACTTAC	rs24166003	+
chr4	66963380	GGATATATTCCCCAAGTCAG	T	/	C	CTAGACAATTTCATTTCCAG		+
chr4	66966558	TAGCAGCAGCAAAATGCCTC	T	/	C	CAAGTCAACATCAGTCCCCT	rs24120475	+
chr4	66971377	TATAGGGGTGAATCTCATAA	G	/	A	TTGCCATTTTTCACATGCAT	rs24103637	+
chr4	66971486	ACTAAGCATTTGCTGCTCTG	C	/	A	GAAACCCAAGAGATAAATCT		+
chr4	66971496	TGCTGCTCTGCGAAACCCAA	G	/	A	AGATAAATCTGTTTTCATTC	rs24147702	+
chr4	66971562	GCCACCACTGAAATGGAAAG	T	/	C	TTCCATTAATTTGGAAAGAC	rs24147703	+
chr4	66971586	CATTAATTTGGAAAGACAGG	A	/	G	TTTTCACTCTAGCCTCCAGG		+
chr4	66971631	AAGGTTATTTTAATGTATGG	A	/	G	CTCAGGCCCGCTATACCTGA	rs24147704	+
chr4	66971775	TTTTCCTTCTGGGAACTATA	A	/	C	ATTTCAATGGGTAGCCCTCT	rs24147727	+
chr4	66977832	AAAAGAAACTTACTGTTAAT	G	/	T	ATGTAAAAACTATTTTTAAA	rs24078723	+
chr4	66984442	GTAATTATGAGGCAGAAATT	C	/	G	AACTACTAGTTTTTCCCATG	rs24078786	+
chr4	66986126	ATGGGTCTGTTTTTAGGCAA	A	/	G	AAGAGAAGGAAAAGGGAACA	rs24055629	+
chr4	66986160	GGGAACAGAATAGGACAGAG	TAAAAAAAAAA	/	TAAAAAAAAA	TATGAGTCATAATGGTAAGA		+
chr4	66987594	AAATTTAGGCATCCTAGATT	GA	/	G	GGAAAAATCAAGTGTCAATG		+
chr4	66987601	GGCATCCTAGATTGAGGAAA	A	/	G	ATCAAGTGTCAATGCCTGGT		+
chr4	66987701	ATTTCAGGGGTCACATTCTT	C	/	T	TTTAAAATGAGGTACACCAA		+
chr4	66994856	TCAGTAGCAATTTAATCATA	C	/	T	GCCAATTGTGCATACAGTTT		+
chr4	67006439	TGAGATAACCCCAAGACCAC	G	/	A	GTGGAGGAAGACACTGATTT		+
chr4	67006452	AGACCACGGTGGAGGAAGAC	A	/	G	CTGATTTTGCCAATGGATAT		+
chr4	67009707	GCATTCCACAATTTAGGCAT	T	/	C	CTAGTTAACCATTCTAGTTA		+
chr4	67009752	TTGTCATCTCTTGTTTTTAT	A	/	AG	TAAAATTGAAATCATCTAGA		+
chr4	67010167	TGTTATAGCAATGGTGGTAG	T	/	C	GAGCAAACCACAGAGGGAAA		+
chr4	67017806	CCCACATTCAGTGACTAAAA	G	/	T	GGAACCATGAATCACACCTC		+
chr4	67017850	GCACAGCCTAGTTTGGAGGT	G	/	A	CTTTGGTAAACAGAGGGACC		+
chr4	67018122	GCTGTGTTATGTAAAGGTTA	A	/	G	CAATTCTGAATGTGAACTAT		+
chr4	67020674	TGAATAGACCTCAGTGTTAG	C	/	T	ATGTCGTAGTAGAACCACTG		+
chr4	67021318	GACCCCTTCGCCCCCACCCC	G	/	T	CCCTGTCTCCCACACACAGG		+
chr4	67021393	CAGTCTGACCAACTGTTGCT	A	/	G	ATGTGTGCCTGGTACAGGAG		+
chr4	67021801	ATTCGTGGTAGCATGCTTCT	T	/	G	TTGTCAAACACCCACCTGAA		-
chr4	67021816	AATTTATTTTCTTGGATTCG	T	/	C	GGTAGCATGCTTCTTTTGTC		-
chr4	67022822	GACTTTATTACGTGGTTACC	T	/	C	AAGAAGGGAATAAAGTACAA		-
chr4	67023946	TCAGGCAAGGGCAAGGCAGT	T	/	C	GCATTGAGCACAAGGCCCCG	rs24061146	+
chr4	67024057	GTCCCAGACTGGCCAGCGGT	A	/	G	GTGGTAAGGCTTTCTGTGGT		+
chr4	67024675	ACAGACAGACTTCTAAGCAA	C	/	T	GACCATGAGAAATCACTTAA		-
chr4	67029454	AAAAAGCTGTAAATGTATAA	CTA	/	C	GAGATAACATTTTACTGCAT		+
chr4	67029495	ATTAATTAAAATTTTCACTC	C	/	A	TGATTTGCAAAAAAGATATC		+
chr4	67032644	CTGACTTTTGATGCTAATGG	A	/	C	TCATGGTCTGACCAACACTC		+
chr4	67032720	ATCCATGTTGGCTGCAATTT	T	/	A	AAATCTTTTACCTTCTTCAC		+
chr4	67032976	CTCTATTAAGGTGCTTCTGT	A	/	G	TTTGTATTCAAAATGAACTT		+
chr4	67033073	GCCCGTGTGGCCACTGGCCG	T	/	C	TGCTCACAGGCTCTCCGATG		+
chr4	67034223	GTGTCTCACCTCTTGGGGAA	A	/	T	AATCAATGCAACTTATGAGT		+
chr4	67034435	TCAGAATAAAAGGTTCTAAT	A	/	G	GGAAAAAAACAATATAGTGC		+
chr4	67034533	TTTTGTTACATAGATCACAG	T	/	C	CCTCAAAGTTGTTTTGGTAC		+
chr4	67040089	CTGGGAGTGAATCTGCAAAG	T	/	C	CACGGGGCAAGACCTGATGA	rs24079628	+
chr4	67040200	GCAGCAAGATAATCCTGTTT	T	/	G	TCTTCTTGTTGTGTGCCATG		+
chr4	67040898	AGAAGGGATGGATAGTCCTC	G	/	A	AGTATGAACTACAATACAAA		-
chr4	67040939	TATCCAAGTGAGATGGGAAC	C	/	T	ACCACCCAATGCGGATGTTC		-
chr4	67046271	TATGCCATGGTTTAAGTCAA	TGTG	/	TGTGAGGTG	CCTGAGAGTCAGATTCAATA		+
chr4	67046452	ATCAACTGCTTATGATGCAC	CAGAG	/	CAG	CTCCTAAATTAAGTAATTTG		+
chr4	67049222	TTATTCCAAATCCATTAGTT	T	/	C	CACAGAGCAAACAACTTAAA		+
chr4	67049843	GCCAGGATAATTTGTTGAGG	A	/	G	GAGTTGGGTGTGGGGGATGG		+
chr4	67049939	ACCTGCGGGTGAGGAGCTGA	G	/	A	AGCAGAGCATCTCCCCAGAG		+
chr4	67050037	CCATACTGGCAGCACCTGCA	T	/	TCA	CACGGGATGGCTGAGACTGC		+
chr4	67050061	GGGATGGCTGAGACTGCTCT	GCCCCC	/	GCCCCCC	GCTGCCTCCCCTGCCGGCTG		+
chr4	67050277	GAGGGGGCCGTGATTCTAGA	GTT	/	GT	CTAGGACTTGTGTGGGAGCT		+
chr4	67050770	TGGGGGCAAAGTCACGTGAC	G	/	C	CTGATGGAAGAGAGTAAGGA		+
chr4	67050919	GACTCTGTCACCTAACTATT	C	/	T	GGTTCAGTTCCTTGTGTCTA		+
chr4	67058871	AATCTTATGTTCTTACCCTC	T	/	C	CTCATCAGACAGGCTTTTCC		+
chr4	67058891	TCTCATCAGACAGGCTTTTC	CA	/	C	TCCTCTATTCTTGACAAAGC		+
chr4	67060136	TAATGATCTTTTGAGAAAAA	G	/	T	CTCATTAAAGTGGAAAAGCA		+
chr4	67060189	TGGGAGAGTTCTGGTTCCAT	CACAACAA	/	CACAA	GTCGATCCAACAATTCCAAC		+
chr4	67060516	GTGCTCTTCTATCTGAAGAG	T	/	C	TTCAGGAAGTCAGCAGTTCC		+
chr4	67071117	TGAATAAAGTAAAAGTTTCC	A	/	G	CAAGTATTATGCTCTTGAAC	rs24126405	+
chr4	67071207	TCCTTCTTACACATAGTAGC	G	/	A	TGCTTAATCTTGATGAACTG		+
chr4	67076745	ATATTTTTGAGTAAACAGCT	C	/	T	GACTGTGCAGATATGATTGA		+
chr4	67076805	TGGAGGAGCAGAGAGAAAAG	A	/	G	CTGGAAATAGTTCAGCAATA	rs24170492	+
chr4	67076826	CTGGAAATAGTTCAGCAATA	C	/	G	TCTAAGAAGTATGTCTTCCA		+
chr4	67076895	TCCATCTGTGAGAGAAGCCC	T	/	A	TCTCTAGGTCCATGTGTGTC		+
chr4	67076915	TTCTCTAGGTCCATGTGTGT	C	/	T	TACTGACTTAGGGCCACTGG		+
chr4	67076974	TCACTGATAAATGGCTGCCA	T	/	C	ACACCAAAGTTTCTGTCTCA		+
chr4	67077015	TTCTCAACACTGGGTATCCA	C	/	T	TCAAAACCTGGTCCCACCTT		+
chr4	67082111	TCATTTCCAGTGCACCTCTC	A	/	G	CTTGCTTGTCCAAAGCCTCT		+
chr4	67082277	ATCTAGGTACATGTTTTGTG	T	/	G	TTGTATGTTAGGAATTATTT		+
chr4	67082401	CAGGTGCATACAGTACAGGT	C	/	T	ATCCTCTCCTTTGGTTCTGA		+
chr4	67093051	AAATGCCATTGATTATAAAA	T	/	G	TTACACTTTCATAGTAATAC		+
chr4	67093084	AGTAATACACAGTACATTCA	A	/	G	TGAAAAGGAATGACTTTTAT		+
chr4	67094489	ACTTCTAATTGTGTAATGAC	A	/	G	ACATTTCATGTTGAACCCTA		+
chr4	67094646	TGATACGGTGACAGTGTACA	C	/	T	GGTGAGATGACATGAACACT		+
chr4	67094749	GCACTGTAGAAGGTGAGCAC	T	/	G	GATTGACATGTGCACTGATA		+
chr4	67094770	GATTGACATGTGCACTGATA	A	/	G	GGGTAACTTTATCCAGTTAG		+
chr4	67097160	TTTATTCTTGGAAATAAACA	T	/	C	GTGAGCAATCCTGGGAATGG		+
chr4	67101710	ATTGGCAAGAGAAAGCAGCA	T	/	A	CAGGAAAAACCCCACATGCT		+
chr4	67108773	GGCAGAAAAGGCTGTTAAAC	A	/	G	AGCAGAAGCTTTGAATGCAA		+
chr4	67109000	CTTCTCTTTCCCACTTAACA	T	/	C	TTCCCTTTACCCATGTCTTA		+
chr4	67109123	CACCATTTGTATTAGGCCAT	A	/	G	CCTCTGCTTATGGACTCAAT		+
chr4	67109149	GCTTATGGACTCAATCGGTA	T	/	C	CTTCTGGCTTGCTGGATGGA		+
chr4	67110462	ATGAGAGGAGATGTGTCTGG	C	/	G	AGGAGATGGAGGAAAAGTTG		+
chr4	67110592	AAAAGGGCTGTTTTAGGAAG	T	/	C	AGAGCTCTTCAGCTGCATGC		+
chr4	67115261	TGTACATTTTTGTGAGGAAA	TA	/	TAA	GGCTTGATTTGCAGAAGGTC		+
chr4	67116320	GCCTGTAACTCTAGGTCAAA	C	/	T	GAATGACACGGCTCATCTTC		+
chr4	67127187	AATCACAGGCAAGAAGAAAG	C	/	A	CTCAAGCGGTACCCAGCAGC		+
chr4	67135917	GGAACTTTGAGGGTAGAGGC	T	/	C	GAGTTTCCCACTGCAAACTG		+
chr4	67136309	TAGAGATTTACTCATTTGGA	T	/	C	GAATCATGGTCTCCTATTAA		+
chr4	67140406	ATGCTCTTCTCAGAAGACTG	A	/	T	CGCTGAGCCAATGGCTAACT		+
chr4	67140543	CTGGACTGCGAATATGGGCT	C	/	A	GCTCCAGGGGAAGGCATGCG		+
chr4	67140662	CTCTTGTTTCTTTAAAAAAA	C	/	A	AAAACAAAAACAAAAAAACA		+
chr4	67147656	CTCCCTGTTTGCTCCACCAG	C	/	A	CTTCAGTTCTCCGGGCGGTG		+
chr4	67149805	AATGATCCCCTTTCGTAGCA	G	/	A	GTGTAATACGGTAACACATT	rs24056866	+
chr4	67149906	AACAATGCAGAAGAGCACTG	C	/	A	TGTCGGAGAACAGAGGAATC	rs24082368	+
chr4	67150006	CATAAAATCATATCTGGAAA	C	/	T	CCACTGTGTAAAATAAAAAT	rs24082369	+
chr4	67151753	AAATTCCATCAGAAAAATGG	G	/	C	GTAAGAACAATGCTCACCCA	rs24142600	+
chr4	67151895	ATAGTGTATCTGTGTAGCAT	T	/	G	AACTCTGTGCACATGTTGGC	rs24142604	+
chr4	67152019	GAAAACCCAGAGTTGATTTC	A	/	C	TAAGCAGTTCTTGTACCTCC	rs24142608	+
chr4	67154998	CTAGCACCTGTCCATGGAAA	TAAGAC	/	T	AAGACAGGTTATACAGTTTT		+
chr4	67157001	TGGTCTGAGCACTAACCACC	A	/	G	GCCAGAGCACCAAGAATCCT		+
chr4	67157894	ACTAATTAGCTGAGGCACAA	G	/	A	CCTAATCACTCACATTGCCA	rs24078871	+
chr4	67158101	CCAGGTCTCAGGATAGAGTC	A	/	T	TGAATGTCCAGAGACAACAC	rs24078853	+
chr4	67162871	AGGAGAATTATAGAGATGGC	A	/	C	AAGGAACTCATGAGCTCTGA	rs24139557	+
chr4	67164097	TCTGTGCTCTCTAGGTGGCC	T	/	A	CCCTAGGATACCTGGTGTCC	rs24139558	+
chr4	67166161	AGATTTTCCTTTAGGGTGGG	T	/	G	CAGTGGTTGGGTGGGGGAGA		+
chr4	67167354	GATGATAAAGAAAACATATC	C	/	T	ATCACAAATGAATGAGTATA		+
chr4	67167564	AAGGTAGGAGATCAAGGAGA	CAGAGAGAGAGAGAGAG	/	CAGAGAGAGAGAG	GTCATTATTAGATTTCAGAG		+
chr4	67167669	AGGCTATTTCATGAAGAACC	C	/	T	CCACATCAACCTTATTAGAA		+
chr4	67171833	GTTCCTCAGTTTAGAGGAAC	T	/	C	CTGAGAGGCTGAGTCCCCCA		+
chr4	67172130	TATTGCTCAAGGGATATAAT	A	/	G	TTCATCTCTAGGCCTTAGAA		+
chr4	67178051	CTGCACTCCTTTGGAAGATG	G	/	A	CAAAACTCAGCTTTCCCAGG	rs24103906	+
chr4	67178058	CCTTTGGAAGATGGCAAAAC	T	/	A	CAGCTTTCCCAGGTCACCTT	rs24103867	+
chr4	67178085	TCCCAGGTCACCTTCCCTCA	C	/	T	CCCCCATCAGGGACCTCACC	rs24103866	+
chr4	67179306	CATCTTTGCTACTCATTCCC	T	/	C	GAACCCTCAGATCAAAGTCA		+
chr4	67179624	TTCAACTGAATGTTTGTTAA	T	/	C	GAGATAAAGTAGTCTTTCTA	rs24071697	+
chr4	67182327	AATCATGATGATTCTCATCA	C	/	T	TGAGTGTGAGCTGAGTTGTG		+
chr4	67182619	AGATCTGAGTCTGACTGATT	G	/	A	TGAATTAGAAGTTAGTTTAT		+
chr4	67192635	TAAAAGAGATAGCATAGGCC	A	/	G	AAGCCCTGTAATGTAATGAT	rs24127413	+
chr4	67193337	GCAAAAAGGCAAAATATGCA	A	/	G	TCGATAACACCATTAGCTGT	rs24127410	+
chr4	67193397	GTTCGTCTTCCCCCTTTAGC	C	/	T	AAACTGGCAATATCCATTAT		+
chr4	67193468	TCAGGCATCTCAGAGGTAAG	G	/	C	GTCCCCATTCATTCACCAAT		+
chr4	67193485	AAGGGTCCCCATTCATTCAC	C	/	A	AATGTCTGACAGTCAAAGTC		+
chr4	67193500	TTCACCAATGTCTGACAGTC	A	/	C	AAGTCTTCCTCATTATCATT		+
chr4	67193676	GGGAAAGTGGCCTGATGAGT	T	/	C	CTTCCATTTGTTCATTTTTC		+
chr4	67193734	AATTTTGGCTCCATTTTTAG	T	/	G	TAATACTGAGATATTTTAAA		+
chr4	67193815	ACAAGAGTGAATGTATTTCA	TAA	/	TAAA	CTTACCATAGGCAAGTGGGA		+
chr4	67194066	TGGCCAAAGCTGCCTTTACT	G	/	A	TTGGTAAAGACACAGAGCCT		+
chr4	67194138	ATGGCCAGAATTTTAACAAG	G	/	A	GGCATGTATACTGATGTATA		+
chr4	67194211	CTGTGATCTGCAACATCATT	-	/	SINE insertion	TATATTGTTCTTAATTCCAC		+
chr4	67194972	AGAGCCTTAATCAATATATT	T	/	C	GGTGTTAAACTGACACTGCT		+
chr4	67195036	AAATGTGATCATGCAGTTTA	C	/	T	GGAACCAAATCAATTTAAAA		+
chr4	67195189	GCCTAGAAAATTATGAGCCC	C	/	T	AATACAATGTCCTTTTCTTC		+
chr4	67195785	ACAAAAAGTGCTCAATCAAC	T	/	C	GGTCGCCTTTTCTTAGGAAT		+
chr4	67196167	TCAGTTAAGAATTAGAGAAA	A	/	T	ACCTTTTATATAACAACTCT	rs24178391	+
chr4	67199354	GCTGGCCACTCTGCTCTGGT	T	/	C	GGTCCAAATGTGCCTCTCTG		+
chr4	67199473	AAGCCTTTTTCTCTACCCGT	G	/	T	TGATTTCTCACAGAATCCTG		+
chr4	67201331	TCATTTTATGTTTGAGATTC	C	/	T	TCTACCTTAGTTCTTTAGCT		+

## Sheet: chr10_8Mb
Supplemental Table S2. SNPs, insertions and deletions identified by or selected for fine-mapping.
chr10:8Mb
Chromosome	Marker position	Left flanking sequence	Reference allele	/	Alternate allele	Right flanking sequence	rs number (dbSNP131)	Strand
chr10	7961584	ATATTACAGGAAAAATATAT	C	/	A	ATTTATAAGCCGCTTGAAGT	rs22008850	+
chr10	7990126	TTCTCATTTTGTTTCAACAA	C	/	T	GTGGGTATTTGTTGTGTACT		+
chr10	7990381	TGACATTTTCTTTTCTCAAA	C	/	T	GCTAAGAGGAGTAGGAATGT		+
chr10	7990425	ATTTCCACAGGGGAGTCTAT	CTTGTT	/	CTTGTTGTT	TCTTTTTATATCAGTTTTGT		+
chr10	7996160	GAGGTCTGTGTGTAATACCT	A	/	G	GGGAGCCAGGTCACAGATTG		+
chr10	8015523	TTCCTAATGGATGCCTCACT	A	/	G	GACTGAAGAGCTTTTGGAAG		+
chr10	8021092	TAGCAGGGGGTCTTCATAAA	G	/	A	TGTTATTTGGGATGAGGTAT		+
chr10	8032830	AGCTATGGCAATTTTCCACC	G	/	A	ATTTGCAGTTAGAACTTTTT	rs22030141	+
chr10	8033050	GTAGTTCAGAGAAGTAAGCC	T	/	C	CTCCTGGTAATACTTGGGGA		+
chr10	8066994	ATGTACACCTTTGTTCCTCT	C	/	T	GTTAGTTTGCAAACCCCTAT		+
chr10	8070913	AATTCAGCTGCTCCGGCTCC	G	/	C	AGGCTCCCACAGGCCCAGAG		+
chr10	8070976	AAGGGAACCCAGACGTGGAG	C	/	T	GGCTCGCTGCTCCCCCAGCT		+
chr10	8081646	CCTTAGGATCCCAGTAATGG	G	/	A	ACCCAATTACCATGACTCCC		+
chr10	8081734	AACGTATTTTTTGCCCCCAC	G	/	A	GCCTTCCCACCTTGGCCTGG		+
chr10	8081793	CCTCCTCCCTCCCCTCTCAT	G	/	A	ATGCATCTAATTGGATAGTG		+
chr10	8081871	GGAATCTAAGAGCTTCTGGC	C	/	T	GGAATTTCAATGGCAGTGAA		+
chr10	8081917	TGATGGATGAGGAGGGATGA	A	/	G	GAGAATTCTGTGCAAGTAGA		+
chr10	8081935	GAAGAGAATTCTGTGCAAGT	A	/	G	GATGCCCCGCTCAGTCCTTA		+
chr10	8100127	CAACCAGCAGGGCTGTGTTT	G	/	A	GAATAGAAAGACCAGAGCAG	rs22005345	+
chr10	8100186	TTTCTCTTTGGAGTTTTGAA	G	/	A	TCCCTCCTTAGCTCATGGCT		+
chr10	8100345	TAGAGTAGAGGCTGTCAGGA	G	/	A	GGCTGGATCCGGGCAGTGTA		+
chr10	8106135	TGTTTGCCCATTACCCAGTT	G	/	A	AGAAAACCTTGCAGAAAAGC	rs22078754	+
chr10	8129954	CTAACATGTGGAATTGGTTT	A	/	T	GGGGGTGGGGGCTGCGGTCG		+
chr10	8132437	GTGGCCTGACTTTTTAGGGC	T	/	C	GCCTCTCCAGTTTCAGAGAA		+
chr10	8137225	TTGTTTTTAATTTTCCAGTC	C	/	T	CATTAATTCTCCCCCTTTTT	rs22059485	+
chr10	8139530	TGCCTGCATAGAGAGAGGCA	A	/	G	CTTTGCTGATTTAGTCTTGT		+
chr10	8150835	ATTTCTTTTAAAGAACTATG	A	/	T	ACAACATATGCCTTCAAGAT	rs22075328	+
chr10	8151076	TAGTCTCTAATCCACGGAAC	A	/	G	CTGTCTTTTCTGAGACCATT	rs22075329	+
chr10	8151117	ACAAATACCAACTCCCACTA	A	/	G	ATCAATGGGAGCATTTTGCT		+
chr10	8158032	TAAATGATGGAGCAGGAAGT	C	/	T	TGTTCCTGGGCAATTTTTGG		+
chr10	8176214	TCAACCAACTTCCATCAATG	T	/	C	AACCAGGGCAGTCAACCTGC		+
chr10	8183593	GACTGCGTCTTGCTCCTGAT	C	/	T	GGGTCTATACTATGTCATTG		+
chr10	8183660	CCACTGTACTCAACTCTTTA	C	/	G	GGTCTGATTTATCTTTGCTT		+
chr10	8183767	GTTTCCCTACAGGAAACTCC	G	/	A	GCATGTACTTTTATTACACC		+
chr10	8205427	GGATCTGGGGTCAGCAGTTG	C	/	G	TTAAAGAACCACAGCAGATT		+
chr10	8208792	AAAAATCTATGCTTTTTGTC	C	/	T	TCCTTTTCTATTTTGCCTAC		+
chr10	8239837	GTATACCCTGCATCCTGCTC	G	/	A	GGAGTGATGTGGACCAAGAC		+
chr10	8239930	AAAATGTTATGCTGAGAGTT	T	/	G	TGTTTATAGTGAAATGTCCT		+
chr10	8250301	TTTCTTTCTCTAAGGGTGGC	G	/	A	TCCCCTCCCTTCTGCCCCGG		+
chr10	8258271	GCATACACAAAACATTCACC	A	/	T	TTTTTACCAAGGTTTTCCAT		+
chr10	8258296	TACCAAGGTTTTCCATAAAT	T	/	A	TGGCTTCGGGGCAAATTCTT		+
chr10	8263311	TGAGGATTGGAGAAATAACT	G	/	T	GGGAATCCATCGTAAAGCAC	rs22106630	+
chr10	8267369	TCTCTGAATTTTCTTACATC	T	/	A	CTTACTAGGAAACATATTTT	rs22089907	+
chr10	8270435	TGGTGGGTGAATAAGTGAGC	C	/	G	AGTGAGTTATTTTTCATTCA	rs22070708	+
chr10	8290112	AAACCCCTTGTTTATTCTCA	G	/	A	TAGGCAGAAACCCATAATTC		+
chr10	8297986	GGACTGTGGGTATGACCCAC	C	/	T	AGGAGGTCAGAGCTGTATGC		+
chr10	8298003	CACCAGGAGGTCAGAGCTGT	A	/	G	TGCACAGGACGCTCGCAGAG		+
chr10	8298331	AAATTTGTAAGTTCTAGAAT	A	/	T	GTTTAAAAGAGTATTTATGC		+
chr10	8298335	TTGTAAGTTCTAGAATAGTT	TAAAA	/	TAAA	GAGTATTTATGCAACGGTTC		+
chr10	8300136	GCAATAACCAGAGGCGGGTG	G	/	A	CAACAGTGCACTAGAATTGA	rs22093984	+
chr10	8300184	AATAATGGAAGGTACTAGAC	A	/	G	TCATCGCCAGAACACTGATC	rs22093983	+
chr10	8300296	TTGCTCTACCAAGTTTCCTT	C	/	T	TGCATCTTGTACCAGGTGTC	rs22093981	+
chr10	8326027	TTTGTCTCTGTGCTTTTAGT	G	/	A	ACCTGCCTCTACTAAGAGAT	rs22017848	+
chr10	8333656	GGTGCCTGTTTGGGGGAGGA	GGTGTGTGTGTGTG	/	GGTGTGTGTGTG	ACCAACTGTATGCTTTCACA		+
chr10	8333821	AACAGAAGATCTCCTTTTAA	T	/	C	AGGCACGAAGCATATCGTCC		+
chr10	8348399	CCTTCCTGGGACCGCCGCCC	A	/	C	GGGGATGCCCGGCCTGTCCC		+
chr10	8348403	CCTGGGACCGCCGCCCAGGG	G	/	GCGACCTCGGGCAGCGGGCGGGGACCGCGGGCGGCGGCGGGCCGCCCCGGG	ATGCCCGGCCTGTCCCTTTA		+
chr10	8348804	GGACGCAGGAGCGAGCAGCC	G	/	A	TGCCCTCCGCCCGTGCGCCG		+
chr10	8348821	GCCGTGCCCTCCGCCCGTGC	G	/	GCCGCCG	CCGCCGCCGCCGCCCGCTCC		+
chr10	8348912	CCAGCCGCGTCCCCATCCCC	G	/	GTCCCGA	TCCCGATCCCGGCAGGACCT		+
chr10	KC529659, position 1156	CCTCGCAGCGCGCCGGCTCT	C	/	T	GCCCGCCCGCCTCGCCCTCC		+
chr10	8350342	AGCGCACGGTAGCGGGGTCG	C	/	T	TGCCTCGGCCCCCCGGGGCC		+
chr10	8350370	GCCCCCCGGGGCCCCTGAGC	C	/	A	GGGGACGTGCGACGGGCTTC		+
chr10	8350387	AGCCGGGGACGTGCGACGGG	C	/	G	TTCCCCGGGGCGAGCGGCTG		+
chr10	8351740	TATTTTGAATTGAAGATCTT	C	/	G	GATAATTGCTCCAATACTTC		+
chr10	8351790	GTTGATCGAGTCATAATTGA	CTT	/	CTTT	ACAATGCAGATACACAGAGA		+
chr10	8351793	GATCGAGTCATAATTGACTT	A	/	C	CAATGCAGATACACAGAGAT		+
chr10	8351907	GAAATGCTAGTACAATGAGT	A	/	G	GTAGCATTCCTCTAAAGTAT		+
chr10	8352203	GCACATGCAGAAAATATAAC	T	/	C	GTAGAGTCAGGGTCCATTTC		+
chr10	8352765	ATTTGCTTTGTGCTGATGTA	C	/	T	ATGATTATATGTAAAACCAA		+
chr10	8356577	GCGTGCATCAGTAAATTCTA	C	/	T	CTGGTAATGCCTTTGAATCA		+
chr10	8356628	TGATCCAAATATGGATGATT	CAAAA	/	CAAA	GTGTTTGAATTCTTTTATGA		+
chr10	8359471	TATATATACAGTTCTGAATC	G	/	A	AAACTTTTTTTAAAAGAGGC		+
chr10	8359855	AGAGCATTAAACACAGGGGG	GAAAAAA	/	GAAAAA	CGTTAAAGCCAGTGTTTTCC		+
chr10	8361976	CTTCTATGAAACAAGACAAA	C	/	T	GCTCAAGGTGGTTAAAAATA		+
chr10	8362119	ATTGATGATTTCTGCTAACC	T	/	G	TTTTTTTCCCCCTCTGCTTT		+
chr10	8362216	AGAAGTGTGCAAACGTTTGG	T	/	C	TTTTTGAAATAGAAGCCTGT		+
chr10	8362501	GGAGAGCATTCCAGGGGAGT	GTTT	/	GT	GAGGGTGAGAGATGGGTAGA		+
chr10	8363940	TGCCATTCCTTTCTCTAGAA	G	/	T	TCAGCATTGCTTTCTATTTA		+
chr10	8363944	ATTCCTTTCTCTAGAAGTCA	G	/	A	CATTGCTTTCTATTTATACT		+
chr10	8366377	CCCAAAGAAAAGTTGTTCTA	CT	/	CTT	AGTAGAGGAAATAAAAGGAA		+
chr10	8373495	GGGAATCCTAAGATGTTAGT	G	/	C	GATCGTGTTCTCTAAAGTAC		+
chr10	8373563	TCACTGTTCCAAGTGATGCT	G	/	A	ATGTCCGAGGAGACGTGTAC		+
chr10	8377305	ACGGCATGCTTCAAAACCTA	C	/	T	TTGAGTGAGAAGGGAACTTT		+
chr10	8377614	ATATTTATGTGTTGTTTTCT	TAAAAAAAA	/	TAAAAAAAAA	CCAATCTATTGAATATCCAG		+
chr10	8377911	CTCCATGGCTGTCTGTGACC	T	/	C	TAGCCACTGAATCATGTAAT		+
chr10	8378024	CCTGTACCCTCACCACACAC	G	/	A	GGTCCCACCCTTCCTGGTCT		+
chr10	8382201	TATAATCTTACAGACCTAGG	A	/	C	GAACAATATTTTCCCTTCTG		+
chr10	8382490	TCGTTATTGCTATTACAAGC	C	/	T	TAAAATGGAAAAACATAATA		+
chr10	8382686	CCACTCAAAAAAACAAAAAT	T	/	C	TGATTCAGTAATTCCTACGT	rs22101806	+
chr10	8386228	TTTTTTTTTAAAGATCACTT	C	/	A	GGGAAGCAGCGCTTGCTAAT	rs22001124	+
chr10	8386270	AAAATGGACAAAACAGAGTT	T	/	C	CTTGGGGGGCAAAACTGTTA	rs22001126	+
chr10	8386392	TTTTCTTTTTCTAGATATTG	T	/	C	ATTGGTGGCTTCATCTCTTT	rs22001127	+
chr10	8386640	TATGCACGAACATGTGCCTC	A	/	G	CTCCACAGTGTGACTTTAAC		+
chr10	8388196	ATAACCCAAGGAAAAAAAAA	C	/	A	CAAAAAAACAAAAACAAAAA		+
chr10	8388288	CCAGATGGAAAATGGGATAC	G	/	A	CAAATACACTGAAGGCAAGA		+
chr10	8390331	ACCTTAGCCCACCTTTTATT	CTT	/	CTTT	AGTTAAGAAAGCAGCCATTA		+
chr10	8390523	AGAAATGGAGGGCGGAGGAG	G	/	A	GGAGGGATGGAGGAGGAGAA		+
chr10	8390594	TGCAGAAGAACAGAGTAGAG	G	/	A	AGAAAGCAGAGAATTTCTGA		+
chr10	8390690	CTCACGTAATAACTGAAAAC	G	/	A	CTGACGCGCTGAGGGGAGGG		+
chr10	8392435	GTGTCGAAAATACTCATGTT	GCCCC	/	GCCC	AAACTGCTAATACATCCTGT		+
chr10	8396417	TGCAGTGGCCAAGCCTCTCT	G	/	A	TTTCAAGCTCTCCCTCTTTG		+
chr10	8396422	TGGCCAAGCCTCTCTGTTTC	A	/	C	AGCTCTCCCTCTTTGGATCC		+
chr10	8400375	AACTCTAAGTCAACTTCGTA	T	/	G	GAGTTTGAGCTACCAATTTT		+
chr10	8400768	AATGATTTGCTTAGCTGTTC	T	/	C	GGTCTGTTATAAGTATGTGT	rs22043693	+
chr10	8403568	TGAGGTGGCTCAGCTGATCC	A	/	G	CTCCCAGCCTCTGAAATGAA		+
chr10	8403876	GGGAAGGAGATAAAGCCCTT	T	/	C	AGACCAACTTTTATATGCAT		+
chr10	8409503	GTGTCCAAATTTCAGAGAAA	T	/	C	ATGTTTCCATCCCTAGTTAT		+
chr10	8416270	GGAGTTCATCATCTCTGAAT	A	/	G	AGTCTGATGCACGGAGACAG		+
chr10	8416603	CTGTATCTGCATCAAAAAGT	G	/	A	TAAAGGCTGCAGTGTATGGA		+
chr10	8418771	GAAGCACAAACCAAAGGTTC	C	/	G	CGTTTGTTGTGTATACCCCA	rs22086384	+
chr10	8418880	AATAAAACGAACAACATTTG	CAA	/	CAAA	GCAATAGAGACACCACCTTT		+
chr10	8418945	GAAAATGTTAGTGAATAGCT	A	/	G	TCCAAAGATGCAAATAAATA	rs22086383	+
chr10	8419066	CTCAACCCAGCAAACATTAA	G	/	A	ATGGAACATAAAATAAGTCT	rs22086382	+
chr10	8419167	AAAATTGTTTGGGCCTTGGC	A	/	G	GTGGTGGTGGTGGGGGGGAC	rs22086380	+
chr10	8419177	GGGCCTTGGCAGTGGTGGTG	GT	/	G	GGGGGGGACTTTTTTAGAAA		+
chr10	8426602	AAGTTAAGTAGACACGGAGT	C	/	G	AATTTACCCTAGGAATGAAG		+
chr10	8426629	CCCTAGGAATGAAGAGAAGC	G	/	A	TAAGTTTTTCTTCTTCTTCT		+
chr10	8426832	GCCAAGCAGACGGAGACATC	G	/	A	TCTGATGGGGGCAGAGCAAG		+
chr10	8429534	GAACTTTTCGACATCAGCCT	G	/	T	CAGCTAAACTCTTGTGGGGA		+
chr10	8431879	CCTCCCTATTTTTCCTCCAC	CACCC	/	CCCCCCGC	CCCCGTCCTTTCTTCTTTTC		+
chr10	8432002	CATATTCTCCAGGTTCGTGC	A	/	G	CAGCGTCTGTCTTCTAACGC		+
chr10	8435834	AATTGTTTCACATGCAGGGC	C	/	T	TGGGAGGAACGAGACTACTG		+
chr10	8435897	GCTGCACGCTGTGGGTCTGG	G	/	A	CATATCTGTACTTACAGATA		+
chr10	8440321	GTGCCACTTGAATCCACATG	G	/	T	GTGCACCAAGGGAGTGAGTA		+
chr10	8444061	CTTCGATGAAGGATGCTCAT	C	/	T	ACCCGCTCTGGGCTTACCTG		+
chr10	8444073	ATGCTCATCACCCGCTCTGG	G	/	A	CTTACCTGTATGACACACAG		+
chr10	8451492	TACTTGCATTCTTTTTAATT	GCCCCCCCCC	/	GCCCCCCCC	AAAAAAATAAAAGGGAGTAA		+
chr10	8451501	TCTTTTTAATTGCCCCCCCC	CAAAAAAA	/	CAAAAAAAAA	TAAAAGGGAGTAAGAGCTGG		+
chr10	8451642	TAACTTTAAATTTTGATAAT	G	/	A	TGATTGTATATGAAAATCTG		+
chr10	8451709	GACTACATTTATCAATGTAC	A	/	T	GAATATAATTTTATGGGTTT		+
chr10	8451761	TTGGTCATTAGCATAAGCAT	T	/	C	GCTAGACTTGTCAAGTGGCA		+
chr10	8456760	AGAAGGATACCTAATTCTCT	G	/	A	ATATCGAACAATGTAAATCC		+
chr10	8456928	GTGGATGAAGTTCAAACAGC	C	/	T	AGCAGCTGTGCCCTGTACTT		+
chr10	8456962	TGTACTTGCGAGACGTCAGT	T	/	C	GTTGTTAATCAGCCCGGCAG		+
chr10	8470982	CATTCTGAAGGTGTCTGCAA	G	/	A	GCACCAGAGGGAAGGCTAAG		+
chr10	8471068	GCATGCTGCCATATACACAC	A	/	C	CAGGCTGATGTTAATAAACA		+
chr10	8478797	ATACATACTTAGTTATTTTT	A	/	G	TTATGTATATTTCCTTTTAA		+
chr10	8478825	TATTTCCTTTTAAAATGTAA	C	/	T	GGTTCCTTTTTGTTTGTTTC		+
chr10	8478945	ATATTTTACTACTACTTTTT	A	/	G	GTAGAGTAAAAAAGATACGA		+
chr10	8479013	TTTCTACTTTTGGTTAAGTC	A	/	G	GTATCACAGTATTCTTACAC		+
chr10	8479025	GTTAAGTCAGTATCACAGTA	T	/	G	TCTTACACATTTGTTGTGTC		+
chr10	8479047	CTTACACATTTGTTGTGTCC	G	/	A	TTAGACAAAGCCCAGAATAC		+
chr10	8479060	TGTGTCCGTTAGACAAAGCC	C	/	A	AGAATACATAGATTGTGTCA		+
chr10	8482811	AGAGATTCAAAATATAAGTT	C	/	T	CAGGGAGTATAGCTATGGTG		+
chr10	8482912	GGAATTCTCACTCGTTCAAA	G	/	T	CGACTATCTTTTTGACCTCC		+
chr10	8483208	ACAAGTCTAGAATTATGATA	G	/	A	GTCTCAAAATCCTGATATAT		+
chr10	8483221	TATGATAGGTCTCAAAATCC	T	/	C	GATATATGTTTGTGTATATA		+
chr10	8483233	CAAAATCCTGATATATGTTT	G	/	A	TGTATATAAATACATGTGTC		+
chr10	8490260	TGTCCTGAAAGGTACTGCAC	G	/	A	TTTGCTAAATAAGCAAAGGC	rs22043752	+
chr10	8491735	GTCACTGCACTGCACACAGG	CCAGAAA	/	CCAGAAACAGAAA	GTGTCACGCTCGCCCGTGAC		+
chr10	8494379	CTACTCTTTGTCATAACTCC	C	/	A	TTAAATGAGTAATAAAGTTT		+
chr10	8494430	GGTCATGGAGCGAGACATTC	G	/	A	CAAGTCATTTTGTCGCACCC		+
chr10	8494503	GCTGACATAACCGTTTTAAA	GT	/	GTT	ATCGTGCTGCTTAAATCAGC		+
chr10	8494977	CAGAAGGACTCACCCATATT	G	/	A	AAACATCTCCTGTCGGGGAA		+
chr10	8509659	CAGCAACTACATTATGGCAC	T	/	C	CTACTAAGATCCTCTCATAT		+
chr10	8509920	CAACCCATCCTAGTTGGAAG	ACCCCCCC	/	ACCCCCC	AAAAAAATTAAAAAACAGTC		+
chr10	8521373	GAGGGGTTGACACCAGATAT	C	/	A	CTGGGACCAACAAGTCATAA		+
chr10	8532777	GAGATAAAGCAGATACAGTC	A	/	G	AAAGGAAGCAAGGAAGGCCA		+
chr10	8535378	AAACTGACATTTTTGAACAA	T	/	C	GTTGTTAAAAGCATCAGTCT		+
chr10	8537463	CAAGCAAATATGTCATCAAC	G	/	C	TGGGCTGTATGCGAAGCCAA		+
chr10	8537475	TCATCAACGTGGGCTGTATG	C	/	A	GAAGCCAAGAGGCCATCCAC		+
chr10	8537578	CAAAAATACAAACAAACAAA	A	/	C	AAAAGAAATATTGCTAATAC		+
chr10	8537625	TTTGAAGCAAAGTTAAGCAG	T	/	C	CAATAAAGTATTCACATGTT		+
chr10	8537627	TGAAGCAAAGTTAAGCAGTC	A	/	C	ATAAAGTATTCACATGTTAC		+
chr10	8537680	ATCATCTACATTAGCCATGT	G	/	A	TAGGCTCCTATTCTCCAGGA		+
chr10	8537757	ACATTAGATGTTAGGTAGAG	T	/	C	ACTTTCTTTTTTACAGGAGC		+
chr10	8538513	AGACGTAATTTCAGTGCTCT	G	/	A	TCTGGTGGGAGATGAGTAAA		+
chr10	8547218	AGAGCAAGGGAATTCACAAC	C	/	G	GTCCTTCCGGTTCTCACTAC		+
chr10	8547359	CCAATTACTCACGACTGGTC	C	/	G	TTATGCTCTTTATTTTGGTT		+
chr10	8547557	AAAAAGATGGCAAATGACAC	G	/	A	CTGAGATAAAAAATGAATCC		+
chr10	8548214	GGTTCCCTCTGATAGCCACA	A	/	G	CTACAGAAAACATACGCTAA		+
chr10	8548605	TACTACTTCAGTCAACGGTG	T	/	G	ATTAGGCAATGGTCAACATT		+
chr10	8555787	TGTTTAGGGTACCAGTGTCA	C	/	T	AAGAAGCCCCATGGTTCATA		+
chr10	8555943	CATGTCAGCACAATGGAATT	T	/	C	GACCAACAACATTTTTGCTG		+
chr10	8567490	AGAGCTTCTTCCCCCAACAG	G	/	A	ATCCTATAGAGACTAAGTCC		+
chr10	8571237	AAAATGTGGATTTTGATCAA	G	/	T	TCGAATAACACAGTGATCAG	rs22018336	+
chr10	8571239	AATGTGGATTTTGATCAAGT	C	/	T	GAATAACACAGTGATCAGGC	rs22018346	+
chr10	8571450	CATCAAGCTAGTTTTAAAAA	A	/	G	TACATTGGCTCTTTCTCTCT	rs22018348	+
chr10	8571573	AGAACTCATTTGTTTACTCC	A	/	T	GAAAACAGCAGCTCCTAAAT	rs22018350	+
chr10	8572308	ACTTAAGCAAAAATTTTAAG	T	/	G	CACATTCAAGAGGCTTTGGG	rs22090616	+
chr10	8574177	TTTTCAGTTCCTCTTGCTTT	C	/	T	TTTTTCTAAAAATGGGACCA		+
chr10	8575842	TTCTTGATTTTTAAGTCTAT	A	/	C	TGGTGTTGGTATGAGTCGAA	rs22007513	+
chr10	8581265	GACGCAGGCCAGAGCCAGAA	A	/	T	CGAGTCTCTAGGAAATGCAC		+
chr10	8586676	GAAGAATAGGAAATGAAAGA	A	/	G	AGGGCTGGTCAAAAATCTAT		+
chr10	8587031	GAAATAAAGAAATCAGGAGA	T	/	C	GGACTTGGTTTCCATGGGAA		+
chr10	8591180	TTTATCCCATCAGAGAGATA	A	/	G	GTTTCTAAAGGACTAAAGTA		+

## Sheet: chr4_39-41Mb
Supplemental Table S2. SNPs, insertions and deletions identified by or selected for fine-mapping.
chr4:39-41Mb
Chromosome	Marker position	Left flanking sequence	Reference allele	/	Alternate allele	Right flanking sequence	rs number (dbSNP131)	Strand
chr4	39077210	AGACACTTTACCAACTTTTT	T	/	C	GCATGGCTATTGCCTCTGCT	rs24111842	+
chr4	39080438	CCTGTTCCAGCATTGAGCAC	A	/	G	GCTGCTTTTGTCTTCTCAAG	rs24128283	+
chr4	39105750	TTGCTGGGCCCCACCCCTGG	T	/	A	GACTTTGATGCAATAGGTTG	rs24129769	+
chr4	39136792	CATGAGGCTGCTACTGATCT	C	/	T	TTCTTTAATAGATATTTTTA	rs24101712	+
chr4	39142131	CTTTGCCCATCTTATTCACC	A	/	C	CTATATCCCACAAAGGCCAT		+
chr4	39142139	ATCTTATTCACCACTATATC	C	/	T	CACAAAGGCCATCACAGCAC		+
chr4	39142327	GTGCTCTGAAGTTTCCCAGT	C	/	T	GGAAAGCCAGCTCAAGCAAG		+
chr4	39142451	CATGACCAGATTTTGCGCAC	T	/	C	GTGCAAGTTTTATCTTTGAC		+
chr4	39146955	GGAATGTAATAAGATGACAG	G	/	A	AAGGTGATGCACAGTGATGG	rs24153819	+
chr4	39149081	AAATCCCACATATCTCATCC	G	/	A	TTCATTTACTCCTGCTAGTC	rs24087929	+
chr4	39149643	AAGAATAAGGGGGACGGTTA	C	/	A	AACAAAGTCACCAGTCTGCT	rs24087932	+
chr4	39149795	ATGAAACCTTTAAGAATGAG	C	/	T	ACCTGTACTTGCAATACCTC		+
chr4	39150019	TTGCTGTCCCAGGTGCCCTC	T	/	C	GAGCCTTCTGTCAAGTAGAC		+
chr4	39150106	AACCTCTCCTATTTCTGTTG	T	/	C	TCAAAGAACCAAGTGACCAG	rs24087933	+
chr4	39150197	TTCATGGAAGGAAGGCTGAC	C	/	G	CCGGAAATTCAGGGGCTTTC	rs24087934	+
chr4	39150476	TCTTGTCAGGGCTGCAGACT	C	/	G	AAACCTTCAAAGTGACCATT		+
chr4	39150501	CTTCAAAGTGACCATTTATT	A	/	G	GTCGGGCGGGGATGGGGGCT		+
chr4	39151457	GCCTTTCAAGCTCGGACCTC	T	/	C	GGGGCAGCGATGCGCCGCGG		+
chr4	39151692	GTCTAACGCTTCTCTCGTCT	C	/	T	AGTTTGAGAGGGTTTTGTTT		+
chr4	39151922	GGGCCCGGGGGCGGGGGGCT	TGGGGG	/	TGGGGGG	AACGCCGTCCCGGCGCGGAC		+
chr4	39152028	GTGCGTTCGGCCATGGCCCT	A	/	G	GAAAACCCGCTCACACACAC		+
chr4	39152062	CACACACTCATACACGCACG	T	/	C	AAAGGCGCGGCCGCCGCCAG		+
chr4	39152066	CACTCATACACGCACGTAAA	G	/	C	GCGCGGCCGCCGCCAGGCCG		+
chr4	39152278	TTTGAGGCACCATCCCTGCC	G	/	C	TTGCCCGGCACTCGCGGCGC		+
chr4	39152951	GCGCCCGGCAGGGCCGGTGC	C	/	G	GGTCCCGGAGCCCCCGGTCT		+
chr4	39152982	CCCCCGGTCTGGTTCAGAGC	G	/	T	CCGCGCTCCATCCCGGCCGG	rs24147732	+
chr4	39154292	TGTGATTTAGTAGCAGCAGC	G	/	T	TTGGGTTCCAAGTAGAGAAG	rs24137629	+
chr4	39154626	CTGGAATAGTCATTTCTAAC	A	/	T	TAATCTCTTTAAATTTACTT	rs24106918	+
chr4	39154633	AGTCATTTCTAACATAATCT	C	/	T	TTTAAATTTACTTTTAGTCA	rs24106917	+
chr4	39154637	ATTTCTAACATAATCTCTTT	A	/	T	AATTTACTTTTAGTCATTAC	rs24106915	+
chr4	39154675	TACTAACTTTTATTTCAGCC	G	/	A	ACCTCTCTGCATTCCCCAGC	rs24106913	+
chr4	39154676	ACTAACTTTTATTTCAGCCG	A	/	G	CCTCTCTGCATTCCCCAGCG	rs24106911	+
chr4	39154692	GCCGACCTCTCTGCATTCCC	C	/	A	AGCGTGGCTGAGAATTTTGT	rs24106894	+
chr4	39154923	ACAAAATGTTTTAGGTTGGC	G	/	A	TAGCATGATTGAAATGTTCA	rs24106893	+
chr4	39155348	AGACCTGTTTTCACCTACTA	G	/	C	GGAAGAATAAATGAGACACA	rs24082484	+
chr4	39155712	TGTATGTATTACAAAGCCCC	C	/	G	TATTGTTTTATCTCATCAAC		+
chr4	39156070	TCAGGGCGACCCCACAGGAT	G	/	A	TCAGGGAAGAATATCAAATT	rs24090569	+
chr4	39156172	CAAGTGAGAAGCATCCCTCT	C	/	T	AAGCTGGTTCCCAGCATGTG		+
chr4	39156278	AAAGGGGCCATTGGGAGGTG	GTTTT	/	GTTTTT	CAGCGACCAGACACTATCTG		+
chr4	39156287	ATTGGGAGGTGGTTTTCAGC	G	/	A	ACCAGACACTATCTGTAGAC		+
chr4	39157333	GAGCCTCTAACCAGGACTTG	T	/	C	CTTTTCTGCCCCTTCTTTCT	rs24117000	+
chr4	39157359	CTGCCCCTTCTTTCTCTCCT	T	/	C	TGTCCTCTCTGTTCTCAGGG	rs24116999	+
chr4	39157369	TTTCTCTCCTTTGTCCTCTC	T	/	C	GTTCTCAGGGCAAATCATTC	rs24116997	+
chr4	39157419	GCCTTGAAATGTAAGGCCCA	C	/	T	GCTCTGCGGCATCGATTTGG		+
chr4	39157554	GAGAACACCCGGGTCATGGT	G	/	A	GAGATGATCCACTTCAAGGA	rs24116995	+
chr4	39157587	TTCAAGGACTTACTGCTGCA	C	/	T	GAGTGAGTGCTGCCCCACAG		+
chr4	39158055	CCTCATCTCCATTTTACAGA	T	/	A	CACAAAACTGAGATTCGCTG		+
chr4	39158071	CAGATCACAAAACTGAGATT	C	/	T	GCTGAAGTACAAGTCATACA		+
chr4	39158384	ATCTTATTCCTTAAAAAAAA	CAAAAAAA	/	CAAAAAAAA	CAAAAAAAATCCCATCTGTA		+
chr4	39158438	TAAACTTTGCAAAGTGATAA	AGTGTG	/	AGTGTGTG	GTACTCAGTTGCTCCTAACA		+
chr4	39159229	CTGCTAAAGGTTCACTGGCC	C	/	G	CCAGATATAGCAGGAGTTCC		+
chr4	39159256	ATAGCAGGAGTTCCTCCCTT	T	/	A	TCTCAAATACACCCTCATTA		+
chr4	39159755	CCAGCACCTCTAGGCAGTGG	A	/	G	TCTCACCTAACCTCACTCCC		+
chr4	39159873	GTTGTTCTTTATCTTCACTG	A	/	T	TTTGGCACAAAGGATCCCAT	rs24098285	+
chr4	39160122	TCCATTCCTTCCCGCCCCAC	T	/	C	TTCCCCATATCAACTGCCTT	rs24082961	+
chr4	39161120	AGTCCTAAAACACAATCTGC	G	/	A	CTTCGTGCCTAGCAACTGCC		+
chr4	39161265	CAGAGTGATTTCCCTGCTCA	A	/	C	GGTGATGGCCCAGGGCTGCA		+
chr4	39161337	GCTAGCCAAGGACTGCTGGG	G	/	A	AATGCTGGTTAGCCACGTGA		+
chr4	39161694	CTGGTAGGTAATGGCCATGT	A	/	AG	TAAGTAGTGGTTAAGGCCAG		+
chr4	39161842	AAGCCAGGCATCAACCTGGT	G	/	A	TATCTCTTGCCTGGTATCAT		+
chr4	39162362	GAAACAAAAAGGCCTGGCCG	G	/	A	GAAATCTTTCCTCCACGCCG		+
chr4	39162539	AGGCAGCGGCAGGTCTCAGC	C	/	T	GTTCCCGGCTGTTCCCCAGG	rs24088345	+
chr4	39162682	GTGCCCTGCTGCTCTGCTGC	G	/	A	GGGGGAGGTGGGCCGGCGAG	rs24088346	+
chr4	39162800	CCTGGCGGAGGGAGGGTGGC	A	/	G	GGACTCGGGTGCAGGAGTGA		+
chr4	39163012	AGGGGGTGGGACCGGTCCAA	G	/	A	GGAGTGGCCCCTGTGTGTCT		+
chr4	39163612	ACGAAGAAAGGAGTCAGAGT	G	/	A	GACAAAGGAAAGGCAGGAGG		+
chr4	39163732	TGTTCCACAGTGAGGCCTTT	T	/	C	CTTTCTTTCTTTCCTTCCTA		+
chr4	39164250	GCCCAGCTAGTATTTATATA	A	/	C	CCCACATCCAATCTCATCAG	rs24157090	+
chr4	39164608	TCAGCTGTTCATTTGTTCAC	T	/	C	GGCTCCTGGGCTGGATGTGT		+
chr4	39165782	AATAAATAAATAAAATCTTT	A	/	T	AAAAAAAATTACTGGATGCT		+
chr4	39165901	TGCCTGAGTCACCAAGACAA	AG	/	A	AAGAAAATGAACTCCATGCA		+
chr4	39166004	TCTCCCCTGTGGCTCCCTGT	G	/	A	GCCTCCCCTTTCTTTCAGAC		+
chr4	39166174	TGCACACCATTGGTGTACCC	G	/	A	CTATGCACTGGGCACCATGC		+
chr4	39166317	AGCTGTCCCAAAGCAAACAA	T	/	C	GTGGCTAATGAGCAGGGGGT		+
chr4	39167964	ATTTTGCTCACTGTTTTGTG	G	/	A	GTCAGAAATTTAGAAAGGGC		+
chr4	39169359	GCCAAGCTCTGTCTGCAAAC	A	/	C	TCAAGGCAAGGTACCCACAG	rs24118425	+
chr4	39169375	AAACATCAAGGCAAGGTACC	C	/	T	ACAGAAAAGCCAGTTCACAA		+
chr4	39169866	AATGCTGAAAGCCACCCAGC	C	/	G	GTGCAGAAGCTTCTCCACAC		+
chr4	39170301	AAACTCACACTTCCAGAAAA	C	/	T	GGGAGGTTGGGAGGAAGAGT		+
chr4	39170463	GTGTGATACAGAGCAGGGAA	G	/	A	CCAGTCTGGCAGGGGGCACG		+
chr4	39171328	CCCCAAAGGAGAGGCAGGTG	G	/	A	AGGCTGAGCTACCTATACTC		+
chr4	39171780	CTTACACCCTACGTGTTACA	C	/	T	TGACATACTTGACAAGCCTG		+
chr4	39173419	TAATAGCCAAAAACCGGAAC	A	/	G	AGCCCAAATGTCCATGGATA		+
chr4	39173680	CAGGGTCAGGCAGGTACTAA	T	/	C	TGACAGGGGCACAAGGGATG		+
chr4	39173938	AACAGTAATTACACTATCTA	T	/	C	GGATTCAACCAGAACCCATA		+
chr4	39174296	GTGCCAGGTAAGAGTCTGAA	G	/	A	ATAAGTAACTCAGGGCTTCT		+
chr4	39174578	TCCTTGTTGCAAGGGAGGCA	G	/	A	GAAAAAAAACTATCTCTATT		+
chr4	39174836	GGTGGTAGCAAAAGCAGTAA	C	/	T	GCAACCTCAGGCCTCCCACC		+
chr4	39175925	GTGGGTCAGGGAGAACCCAG	T	/	G	AGACAGGCAGAGTATGTCAG		+
chr4	39176137	ATTTTCATACTCCCTGGCAG	G	/	A	TCATGGGACCAGTGCCTGCC		+
chr4	39176518	CACCCAGCACAATGCCATCT	A	/	T	CTCAGAAGAGCCCACTAAGT		+
chr4	39177331	TAGGAAGACGACAGGTATTT	G	/	C	AGAGGAGATTTTTTAAAAAA		+
chr4	39177884	CCACTGGCCTCCCACACCTG	G	/	A	CGGCCCACCACCTGTTCTGG	rs24091090	+
chr4	39178162	ACCTCCTGGACGAAAGAATT	C	/	A	AATCTGGCTTGTCTGCCTCT		+
chr4	39178470	GGTTTCTGCCTCAGTTTTCC	C	/	T	ATTGGTAAAATGGGGCTGAA		+
chr4	39178928	GGTTGAAAAGAACTAAATAT	T	/	A	TGGCTAGGTCAAAACAGACA		+
chr4	39180217	GCCAGGTACCCCCCAAGGGG	A	/	C	CGAGGCTGTGGTGGGGCTCC		+
chr4	39180226	CCCCCAAGGGGACGAGGCTG	T	/	C	GGTGGGGCTCCTACAGGAGT	rs24100228	+
chr4	39180879	GGTGTTTCTGGCTTGCAGGA	G	/	C	TTTGGGCGAGTCTCATCTCC	rs24138286	+
chr4	39181271	TTGGCTGGGTTCAAATACTG	C	/	T	GTCCAAGTCTCATTAGCTGT	rs24138282	+
chr4	39181619	CACGTTCTTTGCAAGATTGC	C	/	T	CAAGTATTGGCTGCCCATCG		+
chr4	39182017	CCTAGAGAGGAATTTGCACA	G	/	A	ATCCTTCTCCAAGCTCCTCT		+
chr4	39182161	CAAGAGGAAGGACTCAGCCC	G	/	A	CTGCCTACCACTCATCCACT		+
chr4	39182169	AGGACTCAGCCCGCTGCCTA	C	/	T	CACTCATCCACTAACTTGTG		+
chr4	39182344	GTCTTCACACCAATAGGCTT	A	/	G	GACTCCGGTTGCAGCAGCAG		+
chr4	39182836	GGTCCTACAGAATGTGCCCA	A	/	T	TAGGCTCTAGGGGGCCCCTA	rs24111740	+
chr4	39183153	CCCATATCCAAAAAAAAAAA	C	/	A	CATAACTTTATTGAATCCAC		+
chr4	39183204	AGGCCAATACACTGGCCCTC	C	/	T	CATCTGTGCTATCCTGCTGG		+
chr4	39183246	AGCCGAGTTAGGAGCCAGCC	C	/	A	GGCCTTCACTCATGAGTGGG		+
chr4	39183284	GGGCCCACCGTATTGAGGTC	C	/	T	TTGCCAGGCAGCCCTCTCCC		+
chr4	39183980	TGCCCTCAGTGTCTTCCAGG	A	/	G	CCCAGGCTTGTGGTGCTCTT	rs24078810	+
chr4	39184201	CAGCCACAACTTCCCTGTGC	C	/	T	TCTATTTCCTTATGTGTAAA		+
chr4	39184411	GCACTTTCGGAAGAACAATA	T	/	C	TATGCAAATATAAATCGTCA	rs24160775	+
chr4	39184415	TTTCGGAAGAACAATATTAT	G	/	A	CAAATATAAATCGTCATGGA	rs24160778	+
chr4	39184784	GATAGAAGAAGTCTTCAGAA	C	/	T	AGGCAGGCCTGGGTCACTGC		+
chr4	39185468	TTATACAGACAGCAGCCCCT	G	/	C	TAGGCCCTAAGCCTCTTGGC	rs24160782	+
chr4	39185610	CCAAGCACTTCACAGGTGGG	C	/	T	TCTTAGGGCTTCCACATGGC		+
chr4	39185762	GCTGCCCCCCTAGCCGCAAA	T	/	C	GCTGGGATTCTCATCTCCCT		+
chr4	39185897	CTTGAAACCCACGGTCATGT	A	/	T	CTGTAGCATACATTCACTGA		+
chr4	39186025	GCTCCAGTGGGCACACTGAA	A	/	G	ACTGAGATGCCATGGCGAGC	rs24145258	+
chr4	39186120	CCCTTCCACCTTTTCTCACC	T	/	C	GCCCTGTAGCCCAGAGGTAG		+
chr4	39186170	CCTTTTACAGATGGAGAAAC	T	/	C	CAGGCTCAGAAACAGTGACT	rs24160784	+
chr4	39186533	ATAGCGCCACCTGGCGGCCG	CA	/	C	GGGGCGCACAGCGCGTGTTC		+
chr4	39188306	CTCAAGTCTCAGGCAGGCTT	C	/	T	TTCTATATGGTGCTGAGATA		+
chr4	39188533	CAGAACCATGGGATTATTTG	G	/	A	GGGTGTTTCCCCAAAGCAAG		+
chr4	39189249	TAATAAGTAAAATTTTGGGA	C	/	T	GCCTGGGTGGCTCGGCGGTT		+
chr4	39189343	CACATCAGGCTCCCCACAGG	G	/	C	AGCCAGCTTCTCCCTCTGCC		+
chr4	39189448	AATTATAAATAAATTATTTT	TTAAAAAGTT	/	TAAAAAAAAGTG	AATTTCATTGTGATGGCTGA		+
chr4	39189457	TAAATTATTTTTTAAAAAGT	T	/	G	AATTTCATTGTGATGGCTGA		+
chr4	39189504	TGCGAATTGTGCCCACTGTC	T	/	A	TGAAATGCATGGAGTTGTGT		+
chr4	39189933	CCTCAATTTTTTAAGTTTTT	G	/	A	TTTGTTTCTTTGTTTTTAGT		+
chr4	39189969	TTAGTTTTTTAAACACTCTG	C	/	T	CAGGGATCCCTGGGTGGCGC		+
chr4	39190078	CTCCCGGTGCATGGAGCCTG	C	/	G	TTCTCCCTCTGCCTATGTCT		+
chr4	39190134	TGACTATCATAAATAAATTT	A	/	T	AAAAAATAAATTTAAAAATA		+
chr4	39190147	TAAATTTAAAAAAATAAATT	T	/	A	AAAAATAAAATAAAATAAAA		+
chr4	39190177	ATAAAATAAAATAAACACTC	T	/	C	GCCAGCCAAATAAAACATAT		+
chr4	39190598	GCCTGCAGGGGGATGAATGT	G	/	A	TCCTATTATCAAGGGGAATT		+
chr4	39190999	GCAGGTTCCTGGCCCGAGCG	GAGCGGTG	/	GCG	GCCCCCTGAAGGCACAGCCA		+
chr4	39191032	CTGAAGGCACAGCCACGATG	G	/	A	GACCTTCACATTGGCACGCT		+
chr4	39191050	TGGGACCTTCACATTGGCAC	G	/	A	CTCTCTCCCGCTGCCTGGTC		+
chr4	39191172	AAGGAAAAGATGTTTGTGTA	AGGGG	/	AGGG	AAAGCCACAGTCCAGTGGCG		+
chr4	39191289	GCATCGGGCTCCCCGCAGGG	AG	/	A	CCCACTTCTCCCTCTGCCTG		+
chr4	39191320	CCCTCTGCCTGTGTCTCTGC	T	/	C	TCTCATGAATAAATAAACAA	rs24081027	+
chr4	39191718	ACAAAGGAGCGGTGGGGACC	G	/	A	CCATGTACTGGAGACAGCCC		+
chr4	39191760	TCCAGACCAGAGGGGGCAGC	C	/	T	GCCAGCCAATGTGCCGCCTA		+
chr4	39191975	GGGCCACCACTTTGGAGTCT	C	/	T	GATGCAGACTGACTCACTGG		+
chr4	39192422	CAACCCCATGGTCCAAGGAC	C	/	G	TGGACTCCTGTCTGGGCTCT		+
chr4	39194071	GGGAAGCCCCTGGGTATTTC	C	/	T	TGAGTCCCATCCAATCATTC		+
chr4	39194206	CAGAAGAGAGTCTGGGAGGA	G	/	C	AGGGGAAATAGAGGGGGAAA	rs24084252	+
chr4	39194368	AAGTCTGTCTGGATTCCCAG	G	/	A	GGGTGGGAGAGGGGGGCTAC	rs24084249	+
chr4	39195323	TACAACTTTTAAAAGAAATA	T	/	C	AAACCAAAAAATGTGTATGT		+
chr4	39195554	CCTTCCATTTGAGCATAAAG	T	/	G	AGATCCTGTTTTTTAGCACC		+
chr4	39195913	GGCGGGCAGGGCCGGGTCAG	C	/	G	ACCGGCTGCTGCTGGGGGAG		+
chr4	39195917	GGCAGGGCCGGGTCAGCACC	G	/	C	GCTGCTGCTGGGGGAGCAGA		+
chr4	39196097	CCTCACTTGTGTAAATTTTA	A	/	T	ATACACATAAATAAGCATGT		+
chr4	39196184	GTCCAAGTAGCTGTTTTAAG	G	/	C	CTACCTCTGGAAGAAGAAGC		+
chr4	39197477	TGGAATGAAAACTGAATGCA	A	/	G	AAAGTCTCTAGTCTGGCAAT		+
chr4	39198559	TGGCCACTGACGTCATTGGA	C	/	T	GTCCACCGTGGAGGTTCTCC		+
chr4	39198586	CGTGGAGGTTCTCCTGTGGG	T	/	C	TAAGATACAAATGGGCTCTA		+
chr4	39198677	CATGGCTCATTAGGCACGCC	G	/	A	GAAAAAAAGAACTGTGTGTT		+
chr4	39198750	AGAATTTCAACACAAGGGGA	A	/	G	GAGAATGGAAGACAACAGAA		+
chr4	39199563	CCAAAAGAAAGGATTTCTCA	C	/	T	AGGACATACTTTGGGCTGGG		+
chr4	39199910	GCTAAAAATAATGAAACGTA	T	/	C	GTCAAGTTGTTGTGAGAGTT	rs24129773	+
chr4	39199961	ATGTATGGAAAGCGACACAC	A	/	G	GTCTGCACTCAGATTCTAGT	rs24129772	+
chr4	39199976	CACACAGTCTGCACTCAGAT	T	/	C	CTAGTTCCACTGTTGAGACC		+
chr4	39200035	AAGATCAGAGTGACCTGGTC	C	/	T	GACATCCTGTAATGACTCCC		+
chr4	39200147	TGATCAGAAATGTCTTCCTA	AG	/	A	ATATTTGGCTAAATCTGGCT		+
chr4	39200364	CAGAGAGTCGGTGGCCAGCC	A	/	G	GGCCCCGCCACTTGCCTGAC	rs24160548	+
chr4	39200720	CAAAACACATTTCTGTCTGC	A	/	G	TGTCCAGCATGTACCACGTG	rs24118961	+
chr4	39201166	TCTTATTAACACGTGCTCTC	C	/	A	CGGAGGGTAAGGACACATCT		+
chr4	39201173	AACACGTGCTCTCCCGGAGG	G	/	A	TAAGGACACATCTCTCTTAT	rs24053834	+
chr4	39201941	ATCTATAACCCTTAAGCCCA	A	/	G	TATATAAAACCACAGCTACC	rs24053833	+
chr4	39202891	TACCAGAACCTTGAAGAACA	C	/	A	CTTGACCATGAAAGACACAG		+
chr4	39203123	TCCCTCTGCCTGTGTCTCTG	cctctctctctctctctct	/	cctctctctctctctct	GTGTCTCTCATGAATAAATA		+
chr4	39203218	TTAATATCCTCTGCTCCCAT	G	/	A	AAAGTGATGAAACAAGAGCA		+
chr4	39204499	CAGTTGGGCAGGCTGTGGGA	G	/	T	ATAGGGCAAGATAATTTTGA		+
chr4	39205857	CCAGTGCTCCATATTAGTAC	G	/	C	ACTTCTGGGAATCTGTTCTT		+
chr4	39206521	TCATTTATATATGACACTCA	A	/	G	TGCTTTGGAAATAGGAAGCC	rs24156440	+
chr4	39208372	GGGACATTTGGGGAGGAGGC	G	/	A	GAGGCCTTGGCAGGTCTGGT		+
chr4	39211888	GTGTGTAAATACGGGTTCCA	C	/	T	CGCATGCGGAATGAACAGGA		+
chr4	39212292	CAAAACAAGAGAAAGATGCT	C	/	T	CCTGAAAAGCAAGGAATTAG		+
chr4	39212350	GGTATAAAAATTTACCCAAT	A	/	G	ATCCAGATTTAAGGTTTCCC		+
chr4	39212366	CAATAATCCAGATTTAAGGT	T	/	C	TCCCTGCTGTAATGAACAGT		+
chr4	39212462	CAAACTGCCTTGGGCACCAC	C	/	T	CCCCAGGGCTGGGGGTCAGC	rs24047900	+
chr4	39215461	GTATATTAGTTATCTATTGC	G	/	A	GCATTGCAAATTACCCCAAA		+
chr4	39217614	CCTATGGTATATAGGACAGC	T	/	C	CCCCCTCCCCAACAACAAAG		+
chr4	39219357	TACAAGAAGGGGAGAGTAAC	A	/	G	GGGCTCAGAGCCTCTCCCAC		+
chr4	39219454	ACGTGGATGTGTGACCTCCA	C	/	T	TGGATCATTACAATGTCCAT		+
chr4	39219476	GGATCATTACAATGTCCATT	C	/	T	AATCTAAGACAAGATGAACA		+
chr4	39219529	TGACAAACCACATAGTCCAA	C	/	T	AAAAAGATTCAGTCATTGTT		+
chr4	39220227	TTCAAACTTTCAGATTCCAA	G	/	T	TTTCTTGTGAACTAAGCATC		+
chr4	39220261	AAGCATCTGGGTGCCCAGAA	T	/	A	ATCCAGTAATACCTAAACCA		+
chr4	39221013	TCTGCTAACTTGTCCACCAT	C	/	G	TTACTGTACAAAGAGTTTAT		+
chr4	39224911	ACCCCAGAGGATGCTGCTGG	G	/	A	GCTAGGACAACACCTCCCAA		+
chr4	39225202	GCCTTGTATTTCCTATTATC	G	/	A	ATCCACAAGCATCTGTTGTC		+
chr4	39226019	GGATTCATCTGGAGGCTTCA	T	/	C	CACTCACAGGTCTGGCATCT		+
chr4	39226092	GAACTGTCAACCACTGTGCT	G	/	C	GTACGTGGCTTCTTCACATG		+
chr4	39226128	ACATGGCTGAAGCTTCTTCA	A	/	C	AGCATAGAGGCCTGATGGTA		+
chr4	39226137	AAGCTTCTTCAAAGCATAGA	G	/	A	GCCTGATGGTAGGCAGACTT		+
chr4	39226291	ATTGTTTTATTGGTCAAAGC	A	/	G	GTGGCAAACCTGCCCATATA		+
chr4	39226329	ATACAAAGGGCAAAGATATA	G	/	A	ACCCCACCTCTCAATGGGAA		+
chr4	39226331	ACAAAGGGCAAAGATATAGA	C	/	T	CCCACCTCTCAATGGGAAGA		+
chr4	39226354	CACCTCTCAATGGGAAGAGC	A	/	G	TCTAAGAATCTGGGGCTATG		+
chr4	39229383	CTGAGTGTCAATAAAGGTGT	G	/	A	GAACAACTGTAATCCTTATA		+
chr4	39234478	CATTTTGTTCTAGGTACATG	G	/	C	TACCTTAATAAAGTTGATTT	rs24142530	+
chr4	39234531	AACCCTCTAACAACTTTGCC	A	/	T	TTCTTTAGGGAAGGAAACTG	rs24142554	+
chr4	39234657	AATGCTTATTGATAATATAT	A	/	G	ATTAGGATATTCGGTGATGT	rs24142555	+
chr4	39234866	TTAACACACCACCACCACCA	C	/	A	CAACAACAACAAAAACGAAC	rs24058931	+
chr4	39235004	ACACAGGAGCAGGAGGGAGC	G	/	C	TTTCCTGGACGATGTGCCCT	rs24058928	+
chr4	39235037	TGTGCCCTGGCTCCTCCAGC	G	/	A	GCAGCAGCAGGCGATCCCGC	rs24058926	+
chr4	39235106	GGGAAAGCCAAGCCCCCAGC	A	/	G	CTGGAGACCTGTCCAGAGTG	rs24058924	+
chr4	39235304	ATGCCCTAGAGTCACTTGGC	T	/	C	TTGTTAGGACAGATTTCAGA	rs24058923	+
chr4	39236894	AAATAAATAATAACATCTTT	T	/	A	AAAAAAAGAATACATATAAA	rs24047898	+
chr4	39238115	AATTTGTCTTTCATGGTTTC	T	/	A	AGGTCTTTAGTTCTCCTTAA	rs24165794	+
chr4	39238512	AAAGAAAAACATTAAACTGG	G	/	C	AACTAGAGGAAGAAAGGATG		+
chr4	39238522	ATTAAACTGGGAACTAGAGG	A	/	G	AGAAAGGATGTGCTCAGAGA	rs24165798	+
chr4	39238717	TGAACACCAGGTCAGTGTGG	A	/	G	AGAAGAAACACAGGAAAACA	rs24084828	+
chr4	39239093	CTCTGTTCAAACTGCCCAAC	G	/	A	GACCAGATACATAATTTGTG		+
chr4	39239119	GATACATAATTTGTGGGGCT	C	/	T	GTGCAAAATGAAAACATGGC	rs24084826	+
chr4	39239382	ATACAATAGAATATTATTCT	A	/	G	TCATAAAAAGGAACAAAGTA		+
chr4	39239445	TGAACCCTGAAAACATGCTA	C	/	T	GTGACAGAAGCCAGTCACAA	rs24091548	+
chr4	39239619	AGCTAAAGCCTACAGGTCTC	T	/	C	TTTGGGAGTGATGAATATGC		+
chr4	39239673	GTGTGATGGTCTCACAACTC	C	/	A	GTGGTTTTACCACTGAATTG		+
chr4	39239707	TGAATTGTATACTATAAAGG	G	/	A	ATGAATTGTATAGTATGTGA	rs24091549	+
chr4	39240234	ATGAAGGTTTTCGGGCGCTC	C	/	G	GCCCCTTCTCTAGCTGCGGG	rs24109726	+
chr4	39247369	CGCGTTTACAGAGCTTGCGG	A	/	C	GAATGATCCCGCAGCCTGGT	rs24131763	+
chr4	39249807	TAATTTGCAAACCATGAAAC	T	/	A	GAGGACCCCAGGTTATGGTA	rs24149618	+
chr4	39266795	GATATTAACATGCCAATTCC	G	/	A	GATGAAAGCTTTCAGAGCCA	rs24156357	+
chr4	39272817	AGGGACTAGAAATCCAGCAA	A	/	G	CAATAAGCATCCCACTGGAA	rs24110151	+
chr4	39273068	CTGCCTTCACACTGAGAACA	T	/	C	CAAGCCCAGGCTGGCCTTCT	rs24150109	+
chr4	39280492	CAAAGACTTCAGATTTTGTG	T	/	C	TTTAACACACTGTGGACTCA	rs24094551	+
chr4	39283256	GTGAAGTGGATTGAGGTCAT	T	/	G	CATCAAGGCAGCTGGGAGCT	rs24167668	+
chr4	39298109	GTCTGGAGTTATAATTCACT	T	/	C	TCTCTGAAAGGTCTGAGAAT	rs24094856	+
chr4	39302193	ATATGTATGAATAAGTGTAG	A	/	T	TGAAGAAGTTTAACAGTTTG	rs24126915	+
chr4	39306717	TTTAAGCCCTTAAACTAGAG	A	/	G	CCATCTTTGAAGGATAGATG	rs24081577	+
chr4	40513514	TGGTTAAGAGCTCAGCTGCC	A	/	G	GCGTTTGAAGATGCATTTCA	rs24132368	+
chr4	40534197	ACCCAAATACGGGAGGGTAT	A	/	G	TATCAATATGTAGATATGGC	rs24112650	+
chr4	40543545	AGCAAGTTGAAACCTCCCTG	T	/	C	ACTCCTAGCCTGGGACATTA	rs24085227	+
chr4	40549207	ACCCATTGTCTCCTCTCATC	C	/	T	CTACCCAGCCCTTTGGCTGC	rs24108910	+
chr4	40606685	ACAGCTCTATGGGCTAGATG	G	/	T	ATGGCCTACTCTTGGGTCAC	rs24115463	+
chr4	40609208	CTGGTGGGGAAAGCCAGGCT	T	/	A	TGTTTTTCACCCACTCACTT	rs24159641	+
chr4	40641137	AAAAGGACTAGCAGGGAAAC	G	/	C	AGATAACCATCGGGAGCTAA	rs24150828	+
chr4	40646179	AACAACACAATAGACAAAAC	C	/	T	TTGGTGAGAGACTCATGGCA	rs24108838	+
chr4	40668587	AGGTGACAATCCTATTTGAA	T	/	C	GGAGAGGCCTCAGGGCCATA	rs24058390	+
chr4	40681891	CTCCGGTGCGTGCTTAGCAG	A	/	G	GAAGCTTGGAGAGTGACGTC	rs24100952	+
chr4	40689045	TGACTCATGAGATGAAAATC	T	/	C	ACCCGTCTTAATCTGAGTCA	rs24057458	+
chr4	40696797	GATTCTGGCTGGGCCTATCC	T	/	C	GTGCACCCCAAGGAAGCCCT	rs24169052	+
chr4	40726011	CCCTCACTCACAGCCCTCCA	A	/	G	CCAACAAGCCTCTTTGCTGC	rs24136586	+
chr4	40754105	GTATAGCCAATCTTACTTAA	T	/	C	GGTTTACACAGCACAAAACA	rs24109528	+
chr4	40764649	CCTAGGTTCTCTGTAGACAT	T	/	C	GATCCTACAATTTGTATTAA	rs24082987	+
chr4	40775511	TATTAATGGACGTTTACGTT	A	/	G	TTTCCTGTTGTGTGCTATTG	rs24075948	+
chr4	40783984	GGAGAGGAACAGAGGCCTAG	C	/	T	CTACAGTCCTGGCTACAACT	rs24059160	+
chr4	40799627	GGTGAGCATCCTCTTGCTTG	A	/	G	TTTCTCCTAAAGCTGAGCTT	rs24117125	+
chr4	40810798	ATTAGTACCCATGAGGGCAG	G	/	A	CCTTCGCAAGAGGGTTGCGT	rs24100173	+
chr4	40815571	CGAGTTCCTAGAAGTCCGAG	A	/	G	TCCCGGTGCCTTTCGCCCCC	rs24098731	+
chr4	40865636	TATTCATCCATGATAATAGC	C	/	T	TCAGAAAAACCACAAGGGAA	rs24075565	+
chr4	40892519	TTCAAATTAATGTTAAGAAT	T	/	A	TTTTTTAATGTGCAGAGTTC	rs24105082	+
chr4	40913417	TGGCACCAATTAAATAATGA	G	/	A	CTTTCCTCACATTCAGGACA	rs24165903	+
chr4	40978622	TGATACCTTGAAACAAAGGA	C	/	T	ACTGCATGACATGTTTGGTT	rs24068389	+
chr4	41001465	TATAAATCTTTCTGTTTAAG	A	/	C	ATGTAGGCAGAGTACTTCTA	rs24084211	+
chr4	41073366	ACATATCCTTTCCCTAAACC	A	/	T	CAACAATTTTAGACTCACAA	rs24112916	+
chr4	41095246	ATAAGATTTTGCTCCTCCCC	G	/	C	CTACGTCCTCTCTCAAAATC	rs24090707	+
chr4	41144746	GCAAATGAGCTGGCGGTTAC	A	/	G	GATTTAGCACAGCAGAGGGA	rs24153171	+
chr4	41186663	GGGTTTGATTGTGAGTTGAG	C	/	T	TCCAGGACCACAGCCAGAAA	rs24092201	+
chr4	41254760	CCAGAAAGGAGGGAATAGAG	A	/	G	GCTTCTGGGATGCTGTAATG	rs24049083	+

## Sheet: chr7_43Mb
Supplemental Table S2. SNPs, insertions and deletions identified by or selected for fine-mapping.
chr7:43Mb
Chromosome	Marker position	Left flanking sequence	Reference allele	/	Alternate allele	Right flanking sequence	rs number (dbSNP131)	Strand
chr7	43612056	GTTGCCTGAAACAACCTTCC	C	/	T	GTAGTGTAAAATTCTGTAGT	rs24438857	+
chr7	43621551	TCCTGTTCAGTATGGGGTCC	G	/	A	CCCTGCTTCCCTCAAGTCCT	rs24432441	+
chr7	43625935	AGGCCCAAACCTCATGGCTC	G	/	A	GTGATCCCCAAACCTCAGTT	rs24460164	+
chr7	43628687	TTCATCTCCCACCCACGACC	G	/	A	TCTGGAAGTGAGTGGCCTGG	rs24371328	+
chr7	43632594	CCTGGCTGCTGAGAACGGAG	T	/	C	TGCTGGTGGCCGTCCCGGCT	rs24433471	+
chr7	43633660	GAATCAGTGAGGCATGACAA	A	/	G	GTGTCTGTGCACCCATGCAT	rs24425994	+
chr7	43638552	GGGGACAAACGATGTCCTGA	A	/	C	TCTGTATCGTCCCGTGGGCT	rs24436065	+
chr7	43641314	CCTGCTTCCGTCTTACCCAC	G	/	A	AGAGAAGATTACAGACGTGA	rs24427076	+
chr7	43645027	TATTTATCTCCGTACCCCAC	A	/	G	GTGGAGAAGGAGGTGCAGAG	rs24376081	+
chr7	43650281	TTATCTCACATACTTTGGTA	T	/	C	GATTTGAGGGTGTTTTGTTT	rs24362101	+
chr7	43656641	TACTCATGTCTGGTGAACTG	T	/	A	TAATCACAGTAAAGTTAGTT	rs24404905	+
chr7	43658675	CAAAGCAGTGAGAGTGAGGA	T	/	C	GGACAGGAAGGACATGAATT		+
chr7	43667858	CTGATGCAGGTGTGTCCCTT	G	/	A	TCTTTTTGGCAACTAATTTA		+
chr7	43668135	CTTAACCGACTGAGCCCCTC	A	/	G	GGCACCCCTGTGGTTGGTTA		+
chr7	43674149	ACCCCTATGGGATCTTTATA	C	/	G	GTGAAAAGGGAACAGTTTGT		+
chr7	43677629	CAGTTTAGCTGGGTATAAAA	T	/	C	TTGAGCTTGCCAAATATATT		+
chr7	43680415	CGACTCAAACTAGCTTAATC	G	/	A	AAGTGAAATTAAAGATTTTA		+
chr7	43680679	GTGTGCGTCTTTCATGGATT	G	/	A	AGTTATAACAATCTTCGGGA		+
chr7	43680845	ATGCTATCAGAGAGGTAGAA	G	/	A	GCATATAAAAAATAATCATT		+
chr7	43680975	TACCTATAACTGCATAATCC	C	/	T	AATTTCAAGTGTCCCACTCT		+
chr7	43681264	ATTGCTAAGAGTTTAAGAAA	G	/	C	TCATACAGGGAATAAAAGGA		+
chr7	43681271	AGAGTTTAAGAAAGTCATAC	A	/	C	GGGAATAAAAGGAAGAGAAT		+
chr7	43681795	CAGAGAAAGAGAGAGAGAGA	G	/	A	AGAGAGAGGCAGAGACACAG		+
chr7	43681914	AGGCAGGTGCCAAACCGCTG	T	/	C	GCCACCCAGGGATCCCATCA		+
chr7	43681915	GGCAGGTGCCAAACCGCTGT	G	/	A	CCACCCAGGGATCCCATCAA		+
chr7	43682223	TGTTTTTTCCCTTACCAACC	C	/	A	CCTTAAGAGGTCTTTTTGGA		+
chr7	43682885	CTTATAAAAACCTCAAAAGA	T	/	C	GTGCCTATCTTTGAGGCTTT		+
chr7	43682882	CCCCTTATAAAAACCTCAAA	AGATGT	/	A	GCCTATCTTTGAGGCTTTAC		+
chr7	43684500	GTAAGCCTGTCTCAGGCTTC	C	/	T	GTAACTTCTTGCTGGGAACA		+
chr7	43684565	TGCGGTCCCTTGGCCACTCG	GC	/	GCTC	ACTTTCTGGACCCTCTGAGC		+
chr7	43684567	CGGTCCCTTGGCCACTCGGC	A	/	T	CTTTCTGGACCCTCTGAGCA		+
chr7	43684745	GGGGTGGAACCCTGGCCTGC	A	/	AC	AGCAGTATGCCTGCCCTTGT		+
chr7	43685825	GTTTTTTTTAGAGGGTCAAA	T	/	C	ACTCAGTGAATGTTTAATTT		+
chr7	43686150	AAGGACCAGGTGAGTGCCTC	T	/	C	CCAAAAGCTCTCTCTTCTAA		+
chr7	43686714	AGGAATGGAATCCTGAGACA	T	/	C	ACTACTGTGTGGATGAACTT		+
chr7	43687204	GTATAATTTCTACTTGAGGC	C	/	T	TCTTGGTAAGTGAAAAACCA		+
chr7	43687709	AACTGACAGCTGTAGAAATT	A	/	T	TGATTGCTTTCATGTGGACT		+
chr7	43687740	CATGTGGACTTCTTCCTGGC	T	/	C	AGCTGTCACCTCTGAGGAGT		+
chr7	43687941	TGACCCGAAGTTCAAAGACA	C	/	T	AGGCTCTACCTCAAGCATCT		+
chr7	43688142	CATCTCGAGGAAAGGGGAGA	CTTT	/	CTTTTTT	GTCTTGTTTTTGAAGCCAGC		+
chr7	43688388	GTCTACATTTTATAGGTTTG	T	/	C	CTATTCTGGGTGTTTCACAT		+
chr7	43688750	TTGTATGGACGTGCCACCGT	T	/	C	TGTCCATTCATCAGTTGAGG		+
chr7	43689514	GGTACCAGAGTCCATTGCCA	T	/	C	TGAGCTGGAAGCGTGAGCTG		+
chr7	43689551	GCTGAGGGATCCTGTGCTGA	A	/	C	TGGTGGTGGCAGCAATGCCC		+
chr7	43689737	AAGTTTGGTACAATGAATAC	C	/	T	GGTGGGGGGGGGGAGGGGGT		+
chr7	43690581	CAGATTTTCTAGGCCTCTTC	T	/	C	CTGTCTCAGCTGCCATGAGT		+
chr7	43690817	ACATGAAGATAAAATTCTTT	T	/	C	CTTTCTCAGATTGCTCCAAG		+
chr7	43690917	TGTCAGGAGACTGGCTGTAT	C	/	G	TTTTTGAGGCTTAGCATGAA		+
chr7	43691098	AACACACTGCGAGAGGAAAA	CAG	/	CAGAAG	GAGATGATGGCTTCTGTTTT		+
chr7	43691462	AACCTAGAGTAGGTAGTCAA	A	/	G	GGAACAGAGAATAGGTGGAA		+
chr7	43691495	AGGTGGAAGGGAAAGCCTTT	T	/	C	TCAGAATGAAGGGCAGGAAG		+
chr7	43691496	GGTGGAAGGGAAAGCCTTTT	T	/	C	CAGAATGAAGGGCAGGAAGT		+
chr7	43691688	AGATCAGGGACAGGGAAGAG	A	/	T	ATTAGTGGGCAGTGTCAGAG		+
chr7	43691953	ACCATTAAAGATATTCTAGC	C	/	T	ACTCATCAGCAAACTCAATT		+
chr7	43692334	TTGTACATTGTTCTTTCAGC	A	/	G	TTTAAACATGGGCCTTTGTC		+
chr7	43692365	GGCCTTTGTCTATTTTTCCC	T	/	C	AAATACGTAGATCTCAAAAT		+
chr7	43692610	ATATGTTTTTCTCAACCAAC	TTCT	/	T	CAATTCCTTTCTCTCTTTAA		+
chr7	43692710	AGAATTTCCCACCCTGCTTT	TA	/	TAA	TGGTAGACCTATCACAGATA		+
chr7	43695073	TAGAAGGTATTTTTTTTCAA	AGGGG	/	AGGGGG	TGAATATAGCGGGCTGTAAA		+
chr7	43695194	ACCCATGAAAGCAACAGAAG	A	/	G	GAAGAGATGATAATGATTAT		+
chr7	43695292	ACAGGACTACATTTAAACAG	T	/	C	GTTATTGCAGGCGAGTTCCA		+
chr7	43695315	TATTGCAGGCGAGTTCCACT	T	/	G	GTCAAAGCTCACAGATGTGG		+
chr7	43695346	ACAGATGTGGAACGGAGCGG	C	/	T	ATTCAAAACTACAATCTGCC		+
chr7	43695361	AGCGGCATTCAAAACTACAA	T	/	C	CTGCCTAACCCCAGGGCTTC		+
chr7	43695501	CATCTGAAGGTGCTGTCTTC	C	/	T	GGGAGGCTTTCGTTTCTGAA		+
chr7	43695714	GTCCTACGGTGCTCGCCGCC	A	/	G	AACATAGTAGATGCTTAGTA		+
chr7	43695838	GCAGTGCGGATGCCCAGCCG	C	/	T	CCCCCCGGCTTTGGGCGGCC		+
chr7	43696128	GAGAAGAGCCCCGCCAGCGC	C	/	G	GGTTTGCGGCTCGGCCCCCG		+
chr7	43698069	CTCTCTTGGGGGATACTGTC	CTT	/	CT	GGGGTTGGGTACTTTTGCCT		+
chr7	43698105	TTTGCCTTTTACTTACTTAA	C	/	T	CTTTCTGTGGTTATGGTTTC		+
chr7	43698192	GTGTTCCTTCCTCTTGACCC	CTT	/	CT	AAAAGCTAAATACTACCGGC		+
chr7	43699019	GTTTAAGGTAGTTCAGTGGC	C	/	T	AGTTTTTATAAATGTGATAG		+
chr7	43699757	CAAGTCCCTTTTAAAGGATG	G	/	A	AGAGGGGCATGTCTTTTAGA		+
chr7	43699995	TATTCAACAAATAAAATAGT	CTTT	/	CT	GCTCTGTGTCAGGCCCTGGA		+
chr7	43700560	AGATTAAGGATTTGGCTTCA	G	/	A	TCTCACGTAGTGGAGCAGCC		+
chr7	43701325	CAATTAGCTTAAACCATGTT	TGGG	/	TGG	AAAATCTTTTTAAGAGTGCA		+
chr7	43702273	ATCTTTAGTTTGTGTTTGTA	G	/	A	GAAAACAGAAATCCTAAAGT	rs24445907	+
chr7	43702822	TTGCAAAGTTCACAGACTAA	ACT	/	ACTCCT	GATAAAGGCTACAATGGGAG		+
chr7	43703311	GAGAAAAACCTTGGTTGTAG	G	/	A	CCTGAACTAACACGGTAGAT		+
chr7	43706500	TTGAACCTGCTCCAGTTTGC	A	/	G	CTAATTGCCTCTACACCTAG		+
chr7	43706861	CTTTGTCTTCAGCATTCTGA	A	/	T	GTTTTACCCCCACCAGCCTG		+
chr7	43708003	AGGATGTTTCCCCACACCTC	A	/	G	CTTAGAGTTAGTGGTTCTCT		+
chr7	43709313	CTTATAAATTTGAAAACAGT	A	/	G	CACAAATTCTTGCAAAATAA		+
chr7	43711698	ATTAAAATTTTTAAAATAAA	T	/	C	GCACTTTTGTTTTCTGCTGT		+
chr7	43712887	ATTAATGTAAATTCATTGCA	C	/	T	TTGTAATCAAAATCCTATGG		+
chr7	43713651	ATAAGAACAAGAAACAAAGA	ACAG	/	ACAGCAG	GGCTGAAGACAACATGAATT		+
chr7	43714386	TAACTTTCAGTGATTACATC	G	/	T	TTCCAGAGTGGTCATAAGTG		+
chr7	43715223	AAATAACTGAAGGAATACTA	T	/	A	GGTCATTTGCTCTGACTTCT	rs24397713	+
chr7	43715426	TCTGCTCTGGTGTCCCTTTT	G	/	A	TGACACCTCTCCCTTCTAAA		+
chr7	43715755	GCTTGACAGTGCTACTCCCA	A	/	G	GTTCCCCCTTGTTCTTTACT		+
chr7	43717601	TGCTTTTTTTTCCTCTTTGT	GTTT	/	GTTTCAATTTGTGTTT	TAATTTGACCTGTTTTCAAG		+
chr7	43719549	ACTTAGAGAAAAATGAAAAA	A	/	G	TATTCTTGAAAAGAGGCCCA	rs24445718	+
chr7	43720324	GGAGGAGCAGGCGGCGGAGA	G	/	A	CAGAACGGACAAGAAGAAAA		+
chr7	43720776	TGTAGCTGATTCTGATTTCT	GTGA	/	GTGACTGA	ACAACATTTGAATAAAGAGT		+
chr7	43721266	CTTGCAAACACTCAGTAGAA	T	/	C	GTTCCTGCCTTATTTGGTAG		+
chr7	43721645	AGGAAGGAGCCAGTGTAAAG	A	/	C	CAGGTGAGAAATAGCTTCTT		+
chr7	43722181	CATTTATTAAACACCCACTA	T	/	C	ACGTATGATACACTCTTCCT	rs24415095	+
chr7	43723271	GGCTTGTCTAATTTGGTGAG	GTTTTTTT	/	GTTTTTT	GGCTAAGAAATGTAGATTTG		+
chr7	43724293	AACATAAATTATAAGGCCTT	T	/	A	CCTCTGGTAAAGCTTTCACC		+
chr7	43724294	ACATAAATTATAAGGCCTTT	C	/	A	CTCTGGTAAAGCTTTCACCT		+
chr7	43725001	GCCGGAGAGAATCTCCAGCA	G	/	C	ACTGCAGTGAACACAGAGCC		+
chr7	43725402	CAATACTTAAAACTTTTTTT	T	/	C	CCCCCCCAGTACTTAAACTG		+
chr7	43726178	TTTTAATTTTTTAATTTTTT	T	/	A	AATTTTTTTTCCCACTATTT		+
chr7	43726819	GAAAACATCCTGCTCTTGGA	T	/	C	TTCTGTCTCTTCATAAAATT	rs24374596	+
chr7	43726982	AGCATAATGTCTTGGCTTTA	A	/	G	AGAACACATTCATCAACCTA		+
chr7	43727923	CTTGAATAGGGCTCTCCTGG	G	/	C	ATTGTGATTTAAAGCCTTAG		+
chr7	43729803	TATTGGAGTTGTCTTTTACC	G	/	A	TCTTCCCCCCGCCCCTTGAA		+
chr7	43730250	TAACAGTTATAACTAATACG	T	/	G	TCATCTATGTATGTTACCTG		+
chr7	43730768	CATTTAGGATAAATGTTTAA	A	/	G	TTGTTAAAAGCAAGTTATAT		+
chr7	43731784	CAACTTATTGTTTTAGTTTT	G	/	T	TCTTGCTTTGTTTTTATTGT		+
chr7	43731998	GTAAGGGGTTAGTGCTGATA	C	/	T	GTACATTGTAAAATGACATC		+
chr7	43732266	GTATAATACACAGTCTTTTC	G	/	A	AGTGCACATGGTAACTACAC		+
chr7	43733677	AGATGACCTACATGTTGGAA	C	/	T	TACCATGCAATAAATTGACA	rs8877133	+
chr7	43735361	AACCTTTGTTGAAGTTTTGC	A	/	C	GGGAAGGAATGGGCAATGTC		+
chr7	43735618	TAGCTCTAGGAATTAGCCGT	G	/	A	GGAGGGACAACCTCCCTATC		+
chr7	43735818	TCCTGGCTCTTACTTCAGTA	G	/	A	CTCTGTGACCTTTTTAAGTT		+
chr7	43736754	TTAAAATACGAACGTTAGTC	C	/	T	TTGTTAGTCATATATGAAAT		+
chr7	43738782	TAGGAAATAACAGTCTGTAC	T	/	C	TCTTATGCTTAGTTATCTAA		+
chr7	43740334	AGTCATTTAATTTTTAGATA	C	/	T	AGTTCATATCTTTAAGTTTA		+
chr7	43743050	CAAGTCCTTGAGAAAGACTC	CT	/	CTCT	GAGTTGTAGGAGGCACATGG		+
chr7	43744001	TGATATAAACAACAGCTGAG	ATTT	/	ATT	CAGGACTTTGTTCTTTTGTT		+
chr7	43744212	AGCCCCATATCCATTCTCTG	ATTGT	/	ATTGTTTGT	GCCAGTCAGTAAAACTGCAA		+
chr7	43744479	AGGGTACTCTACAGGACTTC	TG	/	T	TTTGTGTCCTCTTGCTAATT		+
chr7	43745068	GTTCTGAACAACAACTGTTT	ATTGTT	/	ATT	TTCTGATTTATTTCAAGGCT		+
chr7	43745116	ATTCAAGCTGAACTTAAGCT	CTTTGTGCTCT	/	CT	CTTTTAGATTCTGGTTCTGT		+
chr7	43745924	CAGCTTGTGACCTGAGACGC	G	/	A	TTGACAGGCAAAAGTTTGCC		+
chr7	43748527	CTTTACCTATGTGCTGCCCA	G	/	A	GCTGCATTCACTCGTTTTGT	rs9028425	+
chr7	43749299	GGTTGATGATGATGTGACCT	G	/	A	TATAAGCCTCATATCTGAAA	rs24371296	+
chr7	43749368	TATTTCATTTTCTTTTGCAG	T	/	G	GGCTTTAATCAAAGTACTGT		+
chr7	43751087	TCTGTTTTGATAATTACTTA	C	/	T	CTTGAATTTTCTTACAACTG	rs24432406	+
chr7	43751835	TTTTATAATAATGATATATA	A	/	G	TATTCATATTTATTATTCAT		+
chr7	43752463	AAGAGTGAGTTCTCAAGGGT	A	/	G	GGAAATTGTTTACACAAAAT	rs9090792	+
chr7	43753061	CTTCCTAACACACCTGTATC	G	/	A	CATAGATCAGTATTCCTGAA		+
chr7	43753345	AGTTTGTTGTTCTTTAAAAA	G	/	A	ATAAATCTAGAATAACTGTG		+
chr7	43753631	AGTGAAAGAAGCGAGTCACA	G	/	A	AAGGCCACAAGGATTCCAGT		+
chr7	43755821	CCATTTACCTGCACTTGGCC	ATT	/	ATTT	AAAATGTTAGTTGATTTTTT		+
chr7	43759715	TTATGGAATTCAGTGGAATA	T	/	G	TCTCCGAGTAATTGTTTTTT		+
chr7	43759720	GAATTCAGTGGAATATTCTC	C	/	T	GAGTAATTGTTTTTTCTCTG		+
chr7	43763809	AAAGTTTGAGTGCCACTAAT	C	/	A	TAATTGGACATAGTTCTCAT		+
chr7	43765068	CTTATCTATATAGGGATTTG	G	/	A	TCATCACCTTAACATGTAAT		+
chr7	43765348	TTTCTGCATTTTCTCAATAC	C	/	T	TTGGGCAAGCATTTATTATT	rs24430721	+
chr7	43767641	AAAACTGTAATGATGAGAAG	C	/	T	GGTAACATACAGTATGTTTT		+
chr7	43769263	GAACATTCTGTGATAAGCTT	C	/	T	GGTCAGAATTCTGTTTTGTT		+
chr7	43769571	AAAGCAAAAAAAAAATAAAA	G	/	C	TCACTAGAAGTATTTTGTTA	rs24409840	+
chr7	43770522	TGAAATCCTTGACCTTAATG	T	/	TAAATGT	GTTCAATGGGTCTTATAAAC		+
chr7	43771280	TAACCAATGACATTTTATGC	T	/	C	CTGTGGTGAGAGAAGATTCC	rs24403723	+
chr7	43772153	CGGTTGTGGGTGCAGAAAAC	A	/	G	ACTTTGAAAGTGGCAGAAGG		+
chr7	43775471	TCTTTTGGGTGGGTGGGGGG	C	/	T	GATTAGGGATTTACTTCCTA		+
chr7	43775505	CTTCCTATTTCTACTTAAAG	A	/	G	TGGTGGTTTATTGAGCCAGG		+
chr7	43775511	ATTTCTACTTAAAGATGGTG	G	/	A	TTTATTGAGCCAGGAAATTC		+
chr7	43776045	ATTTAGGGTTTTTTTTTTTT	T	/	G	TTTTTTTTTTTAAATCCTAT		+
chr7	43776524	ACATATAAAATTGAATTATT	C	/	T	ATTTGGCTCTGAAAATCTCA		+
chr7	43776530	AAAATTGAATTATTCATTTG	G	/	A	CTCTGAAAATCTCATAAAGA		+
chr7	43777420	GCAGTGTCCATTCTCAGTGA	T	/	A	TGTTGTATTGAGATTACTGC		+
chr7	43778438	ATACACATCTGTGCTACAGA	CAAAAAA	/	CAAAAA	TAGACTAGAAAGTGAAATTC		+
chr7	43778861	ATATAACTCTATAAACAATC	C	/	T	ATAGGGAGCCTTCCTCTGAC		+
chr7	43779329	AACAGACTCACCCTTTTCAT	C	/	T	AAAATGTAAAGATGAGCCCA	rs9105489	+
chr7	43780534	AGATACCTTATCTCTAAACT	A	/	G	TACTTGATCCCACTTTTAAA		+
chr7	43780980	TCTGAAGTTGTCAAAGGGGA	T	/	C	TTTCCACTGCAAGTTACTTG	rs8879890	+
chr7	43781033	ACCAGGCAGTTTTTAAACTC	A	/	C	GTTTAAAAACTTAAATTCAG		+
chr7	43781157	TTATCTTCTTTCAGTATCCA	A	/	C	TAGGTGCTTATGTTTTACAT		+
chr7	43781306	TGCCAGACGTCAGCTTCCTT	CTCTCT	/	CTCT	GTGTCCTGTTTGCTGTTTTT		+
chr7	43781976	ATGGTGGCTTCGGATAAGCC	G	/	A	AGCCTTCGGGCCGCCTCCAG		+
chr7	43782045	GAGGAAGTGACTTTTCAGGC	T	/	C	GCCTGGGAGGATTAGATGGG	rs24426102	+
chr7	43782305	TAGGCTGGACGTCTCTGGGC	G	/	A	GACCTTCTAGTCCTTGCCTT		+
chr7	43782633	TCGACAGTCATGCTCATCTG	C	/	T	CAGTGCAAAGTGGGAGATGT		+
chr7	43782672	GTAGACAAGCTGACGCGATC	C	/	A	CAAGCTGGGTCTGTTTGTTC		+
chr7	43782878	CACCCACTAGACTCTGAGCC	TTGGACAGGCCTAGAG	/	T	GAGGCCCCGTCATAGAGGGT		+
chr7	43783234	TGGAGGAAGTCTTTGGTGGC	A	/	T	CAGCTATCCCTGGTCGCCCT		+
chr7	43785081	GGTTCTGCAAGACTTCTCTA	G	/	A	AACCCTGCCAGGCAGACGTC		+
chr7	43785204	AGGAACATGAAGACAGTTCC	C	/	CTT	GCAAACTGCATGACTACTTC		+
chr7	43785627	CCCACACCATACGACTTTGA	T	/	A	GGTGCAAAGTGGCAGTTTCT		+
chr7	43785698	CTGAGGGCCATCAAGCTATG	C	/	T	GGAGGATGTGAGAAGGGGTA		+
chr7	43785737	TAGATGACCTTAAACTTGCA	A	/	T	ATCAAAGATAACTCATTCTC	rs8788538	+
chr7	43786364	CTCCAGCTTTGGGAAAAGCC	G	/	A	GTAGTGCTTTCTCAGAGCAG	rs8788539	+
chr7	43786441	TCCGTGCCGCACGACGTGTG	C	/	A	CTCTGAGACTCGGGGAGCAC		+
chr7	43786612	CTTACTTCATTACAACCCAC	T	/	C	CTTCCTTTCTGAGTCTCTCC		+
chr7	43787096	TCTGGCCTCTGCATTAGCCC	G	/	C	TTCTGGTCTCAGGGCCTTGA	rs8788541	+
chr7	43787145	CCCTGATGGCTTGCTGTAAC	T	/	A	CTGGCTGCTCTCAAAGCCCA	rs8788542	+
chr7	43787192	GTGTCACCCCCAGCATGGAC	CTTTGCCCATCTTCCCTTAC...CCATGGAGGACGCACTACTT	/	CT	TTCACGTTGCCACCCAGGCT		+	5.7 kb deletion
chr7	43788189	CCTGTCTCAGCTGAAGCTCT	T	/	C	AATACTGCAGAGGGGACCAA		+
chr7	43788468	CTGTTATTTTCATTTTTTTT	T	/	A	AAAAGATTTTATTTATTTAC		+
chr7	43788836	CCAGGGAGGACCTTGATCCG	C	/	T	TCTCCTGGATGTACCCATGA		+
chr7	43789171	ACTTGTTTCTAGGACGAGAA	G	/	A	GCAGCCCATAGGCCCTGTTG		+
chr7	43790016	ACATCTCTTTTTACCACCAA	C	/	A	TGACATCTGCCACACACTTT		+
chr7	43790911	CAGACCTGGGATTTGAACTA	GAA	/	GAAAGACCTGGGATTTGAACTAGAA	GCTTTCTGGCTCTGCTCAGC		+
chr7	43792545	ACATGGATGGAGACGCTGTG	G	/	A	GGGTGGTCCTTGAGAGAGCT		+
chr7	43793254	AATATATATATATATAATAT	T	/	A	TTGAAGATTTATAAAATAGA		+
chr7	43793256	TATATATATATATAATATTT	T	/	A	GAAGATTTATAAAATAGAAT		+
chr7	43793614	TAGTTTGAAATTCTTATTTG	A	/	G	CATTATAGAAGCTGTTGGAT		+
chr7	43794129	CAAGGAAAGCACTAACGGGA	AGGCTGAAAACTGAGCAGAA...GAGCACCGTTGCCAACTATG	/	AG	GTGATTTCAATCTTTCTGTG		+	9.9 kb deletion
chr7	43795001	ATATTTTTTAAAAGTACTAG	A	/	G	TATACATAGTTAATGTTGAG		+
chr7	43795381	CAAGTTCTTCAGGCTGAGAG	G	/	A	AAATGATACCAGAATGGAAA		+
chr7	43795508	CAATAGAAATTTATTTCTCC	T	/	C	AGTTCTGGAAGCTGAGAAGT		+
chr7	43797585	GGAATACTTAATGTTTTTGA	T	/	C	CTGAATAACTTGAGGAATGG		+
chr7	43798134	GTGGGTGGTGGAGTGGGCCA	T	/	C	GAGAGAAGGGCCACTGAGGA		+
chr7	43798319	ATCCAGCAGGGAAGGGAAGA	C	/	T	CAAGGGCGTCAGGGGGACAG		+
chr7	43798433	GGAGCTCAGGCCTAGGGGCC	G	/	A	GAGAAGGCGGGAGTGCACTT		+
chr7	43798459	GGCGGGAGTGCACTTGGGCC	T	/	C	TGAAGCGGGTGCATTCGGTG		+
chr7	43798511	GCCGGGCTTCTTCTGGGTGC	C	/	T	TCTGCCTCTTCTGTGATTTA		+
chr7	43798689	GAGCCCACTGGAGGTGAGCC	G	/	T	CGGGCCTGGCAAGCGACACT		+
chr7	43798827	GCCCTGATGACATCAGGCTC	T	/	G	GCTGGAAGACTTGCTCTCGT		+
chr7	43798831	TGATGACATCAGGCTCTGCT	G	/	A	GAAGACTTGCTCTCGTGGGT		+
chr7	43798948	TTTCTGTCCGCCCCACGCCC	A	/	G	AGGGCCTCTATCCCGGACAG		+
chr7	43798973	CCTCTATCCCGGACAGAGGC	C	/	T	GCTGCATCGGCCCGGATGCT		+
chr7	43798993	CGCTGCATCGGCCCGGATGC	T	/	C	GGCCCCCCGGGCGGTGGGGA		+
chr7	43799079	CTCTGCGATGACATGGTGTC	C	/	T	GGAGCATGAGCGGAGCTGAC		+
chr7	43800295	GGGGAGAGCCGGCCCTCAGC	G	/	C	AGGGAGCACAAGCCCAAGGT		+
chr7	43800296	GGGAGAGCCGGCCCTCAGCG	A	/	T	GGGAGCACAAGCCCAAGGTC		+
chr7	43800488	CCAGTGCCACCTGCCTCCCC	C	/	G	GGCTGGGGCGTGCATGCGTC		+
chr7	43800561	GCCTCCTTTTGTGTTTTGTC	G	/	A	AAGACGAGTGTGCTAATTCT		+
chr7	43800593	GCTAATTCTCAACGACCCCA	C	/	A	ATTTCACCTTGGGTCCCTTT		+
chr7	43800638	AACTCTGTACTCATGGGCCA	A	/	G	TCGCTTCCCGTGGTCTCAGT		+
chr7	43801991	TCCTCCTCTGCTCTGGGCCC	T	/	C	GCTTTATCTGCAGAGACCCC		+
chr7	43802025	AGACCCCCAGCCCACACGGC	G	/	A	GGAGGTGGGGGGGGAGCAGG		+
chr7	43802078	ACAGAGCCAAATGAGGTCTC	T	/	G	GGGGGAGGCTGGGTGGCTGA		+
chr7	43802248	AGGCTGTCAGTGGCTGAGAG	C	/	T	TTGTCCGGTGCCTTCCTTCC		+
chr7	43802381	GCCTTTTGAGGCCTGCACAC	C	/	A	GTGTGTCCCCTGCACAGAGC		+
chr7	43802383	CTTTTGAGGCCTGCACACCG	T	/	C	GTGTCCCCTGCACAGAGCCT		+
chr7	43802384	TTTTGAGGCCTGCACACCGT	G	/	A	TGTCCCCTGCACAGAGCCTC		+
chr7	43802425	CCCACTTGCCTAGGCCACCT	C	/	T	TCTGTGCTTGGGACCTCGGC		+
chr7	43803299	TCTGGACCCACCCTGGAGCC	T	/	C	GGCCCTGCATTGGGCCCAAG		+
chr7	43803811	GTAAGAAGTCCGAAATGACC	G	/	A	TCCTTAGAAATGTCAGCCTG		+
chr7	43803940	TGCACCCGTAGAAGCAGGCA	G	/	A	ACCCCGTTGGGTCTGCCCTC		+
chr7	43805128	TTTACGGTTAAATAAATGCA	T	/	C	GGCCATCTGTAGGCAGATAG	rs24387365	+
chr7	43805175	GCGGGATGCATCAGCTTTCA	A	/	G	AAAGGGGGGTAATGAAAAAT		+
chr7	43805326	AATAAATACTCAGTTTACAG	A	/	G	AAAAGAGGAAAGGTAAAGTG		+
chr7	43805657	CGTGGCTTCAGAGTTTGAAA	C	/	T	AAGAATTAAAATCTGTATTC		+
chr7	43805738	CTTCAATGGGCTCAGTGCTC	A	/	G	TTCTCCACTACCCTTTCAAT		+
chr7	43805750	CAGTGCTCATTCTCCACTAC	C	/	T	CTTTCAATCAGACCTTACTG		+
chr7	43805921	GCTCCTGCTCTTCCTTCCCC	C	/	A	ATAACAAGAGGCAGCGGGTC		+
chr7	43806027	CAAAATGCTTGGTCTCTCCA	G	/	T	TTGCAAAAGAAAACCTTATT		+
chr7	43806649	TCCTAAAACAAATAGCCTTA	A	/	G	TATCAGTAACACACCTCAAA		+
chr7	43806706	TGGTTAGGTCCTTGGGTTCT	C	/	T	TCTCCTTGGGAATCTCACTG		+
chr7	43806954	TGTCCTGGCAAATGTACCAG	C	/	A	ATCCCAGGCGTTGTCCTTCA		+
chr7	43806964	AATGTACCAGCATCCCAGGC	G	/	A	TTGTCCTTCAGCCCTCCTCC		+
chr7	43807016	CCCCACCTCCAATCCAGCAC	G	/	A	AGGTCCTGTGAATTCTTCCA		+
chr7	43807886	CCATGGGAACAAACCTTGAG	A	/	G	ACATGCAGATCATGCTACAA		+
chr7	43807915	ATCATGCTACAAACATGTCC	A	/	G	GATGCATACATGTGCATCAA		+
chr7	43808458	TGTCCCAAGTTAGGTGTTTG	T	/	C	TCCCCAGGGACGTGCTCCCT		+
chr7	43808640	GTCAGCCTGCTGCACGCTGA	C	/	T	GGGGTGTTCCCGAGCCAGAC		+
chr7	43808654	CGCTGACGGGGTGTTCCCGA	G	/	A	CCAGACCAGCCGGGTAGCAT		+
chr7	43809298	ACTTCATCCACCCCTACATA	C	/	A	TTCCACGCTTGTAGGCCTTG		+
chr7	43809537	CACATACAGAGAAGGCCAGG	C	/	T	GAAGAAGTCGGGGGTGGGAA		+
chr7	43810242	GCGTCCTTTCTGCTTTATAT	T	/	C	CTTGGGTGTGGATGAGTCTC	rs8600450	+
chr7	43810672	GTCATGATCCCGGGGTTCTG	A	/	G	GATCCAGCCCCATGGCATCG	rs8600451	+
chr7	43810962	GCAGGAAACATGAATTGATT	A	/	C	TTTGTACAATTCAATTGGCA	rs8600448	+
chr7	43811247	AACTTCCCTCCCTCCCTCTT	C	/	T	GGGTTACACCTGAAGGTCAT		+
chr7	43811648	CTGGGATGGTGCCCACCACT	C	/	T	ACCTCACCCAGGGGGCTGGT		+
chr7	43812011	AACAGTGAGGTGCTTAGCTG	T	/	C	CCCTCACAAAGGCTACTTTT	rs8543748	+
chr7	43812126	GAAGGAGTATTCCTTTTTTT	T	/	C	CCCCTTTCCTTCTTGCTGGA		+
chr7	43812196	GCAATCTTAGCCTTGAAGTG	C	/	A	TCTTGTAAGTCACGTCTGAT		+
chr7	43813189	ATTACTATGGTTATGTCTGA	C	/	T	TTGAACACATCGAGAAGTCA		+
chr7	43813434	TTTAATGACCTTGCCATTTT	C	/	T	CAGGACTATTGGTATTTGGT	rs8543746	+
chr7	43814524	AAATAGTGAAAAGCCTTACT	T	/	C	TCAGAACTAATAGCATAATG		+
chr7	43814548	GAACTAATAGCATAATGGAG	AG	/	A	AACAGAAAAAAAGAATCAGT		+
chr7	43816186	GAGGTCATCCCAGATTCAGT	C	/	G	CCCAGGAGAACACAGCAATC		+
chr7	43816220	AGCAATCATGGACTCCAACC	T	/	C	GGCAAATGTCTCAGTTTCCC		+
chr7	43817232	TTCGGTCTCCCTGTGTTCTG	C	/	T	TGTTTTCGGGTTACCCGAGG		+
chr7	43817529	AGTAAGGCAACCTGTGATGT	G	/	A	AGGTCCACTTGCCAGGGTGG		+
chr7	43817555	CACTTGCCAGGGTGGACGGC	G	/	A	GTCCTTGCCAGCAGCCACAG	rs9026058	+
chr7	43817567	TGGACGGCGGTCCTTGCCAG	C	/	T	AGCCACAGCCATGGGCTCGA		+
chr7	43817859	CCTTGTCAGCTGGGTTTGCA	T	/	C	GTGGAAGCTGGAAACCACAA		+
chr7	43817875	TGCATGTGGAAGCTGGAAAC	C	/	T	ACAATCCTGTACAAGCTCTC		+
chr7	43818281	ATTCATTAGAAGAAAGACCC	G	/	C	AAGGCTGAGCAGTATTCAAA		+
chr7	43818901	TGGTTCCCTTTAGAGGACAA	A	/	G	GCACCCGAGTAAGAGAAGAT		+
chr7	43818907	CCTTTAGAGGACAAAGCACC	C	/	T	GAGTAAGAGAAGATTTCAGA	rs24463015	+
chr7	43818987	AACTCGGCCATACGCTCCTT	C	/	T	GTTATTAGGAGGGCTCCCTG	rs24452781	+
chr7	43818990	TCGGCCATACGCTCCTTCGT	T	/	C	ATTAGGAGGGCTCCCTGCTT	rs24463016	+
chr7	43819208	CAGCACTACTTGGTGAGAGA	C	/	G	AGAAATGAAGTAGGGGAGGG		+
chr7	43819468	TAAAAACCAGCTTTATTGAA	A	/	C	TATAACTCACATACTACACA	rs24371641	+
chr7	43819540	TTTCTCGTATATTCAGAGTT	T	/	C	TGCAGCTATCATCACAATCA	rs24371639	+
chr7	43819558	TTTTGCAGCTATCATCACAA	T	/	A	CAATTTCAGAACATTTTATC		+
chr7	43819763	GCGAATGCTTTCAAGAGTCA	T	/	C	TCATGGTGTAGCATATATCA		+
chr7	43819885	ACCGAGCCCCCACTGGGGCT	C	/	T	CCGACTCCACAAGGAGTCTG	rs8737574	+
chr7	43819904	TCCCGACTCCACAAGGAGTC	T	/	G	GCTTCTTCCTCTCTCTCTGT	rs8737573	+
chr7	43819994	CTTTTTACCACGGAATAGGG	T	/	G	ATCACAGTTTACTTCTCCTT		+
chr7	43820102	TCGAGTACAGGTTGGAGGCC	T	/	C	GTTGTCACTTCTCTTGGCTC	rs8737575	+
chr7	43820126	GTCACTTCTCTTGGCTCTAT	A	/	G	CCTCGGGGTGGAACTGGGCA		+
chr7	43821353	TGATTCTGTGGTTCCATGGC	C	/	A	GTGCTCAATAGTAGGACCCA		+
chr7	43821357	TCTGTGGTTCCATGGCCGTG	C	/	T	TCAATAGTAGGACCCAACTG		+
chr7	43821420	CTGGAGAGCACACCACAAGT	A	/	C	GATGGTGTTGCTCTGTGGTT		+
chr7	43821922	ATAGCGCCTGGCATATACGT	G	/	A	GCTGTCATCTAGGAAAAACT		+
chr7	43822375	ACTTCCTGTCTGGACATGTT	A	/	G	CAGGGAAAGGGTCCAATCCC		+
chr7	43823053	ATCCAAAGGAGGGCCCCAGT	A	/	G	TGAGAAGCACAGTGTCAAAC	rs24452580	+
chr7	43823554	AGCATTGTGGGGAAGTTTGT	C	/	T	GCCTGGACAGGACTTCTGAG		+
chr7	43823765	TGCTACAAATTGGTGTGTGT	G	/	A	AAGTTTGCAGCAATCCTAGG		+
chr7	43823853	TTATTTATGATACTCACAGA	G	/	C	AGAGAGAGAGAGAGAGAGAG	rs24365045	+
chr7	43823951	CGATCCCGGGTCTCCAGGAT	C	/	T	GCGCCCTGGGCCAAAGGCAG		+
chr7	43823974	GCCCTGGGCCAAAGGCAGGC	A	/	G	CTAAACCGCTGAGCCACCCA		+
chr7	43824197	TATTGTGCATCAGGCTTAAT	A	/	G	AATTGTTTTCAAGTACTATC		+
chr7	43824889	TTTTGTACTGAGGACTCTCA	C	/	T	CCACTGCACCCCTCCATTAG		+
chr7	43825015	CTAACCAGTATCTTGACTCT	C	/	T	CTGTTCAAGGCCCTTTGATT		+
chr7	43825873	GTCCCTAGTCGTAAGCTGTG	A	/	T	GAAGACGAATTCTGTTGATG		+
chr7	43825918	CTGGGAGTCCAGAAGGGGAT	G	/	A	TTTCCCCAGGCTAGTATCTG		+
chr7	43825933	GGGATGTTTCCCCAGGCTAG	T	/	C	ATCTGATGAGATCACAGCCC		+
chr7	43825990	ACCCTTCTGGCTGCAGGGGG	T	/	G	GGGGGGCGGGCGGGAGGGAC		+
chr7	43827018	CAGAGCTGGAGGCTGGGGTG	C	/	A	GTAGAGGAGGGGGCTGCACA		+
chr7	43827309	GGAATCTATTAAAAATTTTT	A	/	T	AAAAAAGATTTTATTTATTT		+
chr7	43827522	AGTCCTATCTAGGTGGGTGG	C	/	T	TTCCCCATCTCCCAGTTGGG		+
chr7	43827807	TGGGTTCCAGTGGCCAAGGG	G	/	C	GCCTCCAATCTTGTGGACTT		+
chr7	43828011	CCATTCCACTGGGACAGCTG	T	/	C	CTGGGCAAACCGGGACCTAT		+
chr7	43828383	TGTGCTGAGATGCAGAGAAG	A	/	C	TTTGTGTGGAGCTCACTCAT		+
chr7	43829603	TTGTAGCTGCCTGCCCATGA	C	/	T	CTCCTGGGCAGGGACAATGC		+
chr7	43829630	GGCAGGGACAATGCCCAGGC	TGGGGG	/	TGGGGGG	CCTTTGTCTCCCTCCCTGCG		+
chr7	43829856	GGAGACGGTGTCTACTGTGT	G	/	A	TGCTTTAGTAAACTTGGCCT		+
chr7	43829973	CCCGACCCCAACAAGACAGC	G	/	A	GCTGTACTTGGAAAGCTTTG		+
chr7	43830015	TAGTGACGGAGCGCACCAAC	C	/	T	GCTTGCCTTAAAATGGAGAT		+
chr7	43830042	CTTAAAATGGAGATGAAGGA	T	/	C	GCTTACAGAGACCTCAAGAA		+
chr7	43830783	GGCAGGGGCACCTGTGGAAG	C	/	T	GGGGAGACTGACGGGAAGCT		+
chr7	43831077	CCTGGGGTGGAGTCCTGCAT	C	/	T	GGGCTCCCCACAGGGGGCCT	rs9228718	+
chr7	43831609	CCGTGCGGGGTGCATGCTGT	GCTC	/	GC	CAGACACCCACGTGTGTGGA		+
chr7	43831624	GCTGTGCTCCAGACACCCAC	G	/	A	TGTGTGGATTATATTAGTTT	rs24418917	+
chr7	43831737	AGAAATTAAGAAACCTGCCC	G	/	A	TGGTCACAGTGGGTCAATGG		+
chr7	43832878	GTGCTCAGGCCGGGCGGGGG	C	/	G	TCCGAGAAGCTCTTTCCAGA		+
chr7	43834557	GTCAATAGGGAAATGGGATT	T	/	A	GAGTTTGAAAAACAGGGACT		+
chr7	43834599	ATGAACTGAGATTTCACTTA	C	/	A	CCGTTTGTCGTTGCCCAGAG		+
chr7	43834601	GAACTGAGATTTCACTTACC	C	/	T	GTTTGTCGTTGCCCAGAGCG		+
chr7	43835254	AAGCCTGGGTTCCCGGCCTG	G	/	C	GGATGGTCTCTGCAGATGCA		+
chr7	43835306	CTGCCCCTGCATCTGGTTGC	C	/	T	TCCCTTAGGTACTGGCACCT		+
chr7	43835678	GCTGCTCTTCTGCACTTACC	A	/	G	CGGACACTAAGGACTAGTCG		+
chr7	43835880	GCTGCCAGGACCGCCTTCCT	C	/	T	TCTCCCCTGTTGTGACAATC		+
chr7	43835951	CCCAGGGATCGAAGTCACTC	A	/	G	ATCCCCAGGGGTCAGAACCA		+
chr7	43836224	TGCCATCCTTATGGTAACAT	T	/	A	AAATAAATATGGTAACATTA		+
chr7	43836721	AGAAGCAATGCAGGAGAAGC	C	/	T	ATACTTAAAGAATTAATAGA		+
chr7	43836806	AAAGGGCCTGGGATGGCCAG	A	/	C	AAAATTTCAAAATCTACCAA	rs24406244	+
chr7	43836859	ACAGTGAGATTTTTAGAGCA	T	/	C	CAGAGATCCAGGGAGACCCC		+
chr7	43837264	GCCTTAACTTCATTATCTCT	GCGCACATCACGCACATCAC	/	GCGCACATCAC	CTTTCCAAAGAAGGTTACAT		+
chr7	43837458	CAAAACTATAACAATGAAGC	A	/	G	TATTTTCAAAGCTCTGAGGA	rs24406246	+
chr7	43837541	ACAATGAAGCCCTATCAGAC	G	/	A	AGTACGGACTCAGAACATTT		+
chr7	43838128	TTTTAAGAATTATCTATTGT	C	/	G	TCACTACTACGGGAAAACAG		+
chr7	43838138	TATCTATTGTCTCACTACTA	C	/	A	GGGAAAACAGGTTTTAGTTT		+
chr7	43838691	ATTTCTCATAGGGTTTTTTT	A	/	T	AAAAAAAGATTTTATTTATT		+
chr7	43838854	GACTTGATCCCAGGACTCTG	AGATCATGA	/	AGCTTGATCCCACT	CCTGAGTGGAAGGCAGATGC		+
chr7	43839041	CTCTGTCCAATTAAAAAAAA	A	/	C	CAACCTCATTTCTTAGCCTC	rs24399352	+
chr7	43839135	AGTCTCCTTAAAAGGATAGT	G	/	A	TGCCCTTCTTTTTCTGCTTT		+
chr7	43839252	GGAAGCCATGTTCCATGAAA	CAATAA	/	CAA	GACAGAAGCCTGAGTTCCTG		+
chr7	43839323	CACACTGGACCTGCACTGAT	T	/	C	CCCCCTGGGCTTTCTTTTAC		+
chr7	43839514	GCCTGTAGAATAAAGGTATG	T	/	C	GATTCTTTCTCCCCAAAATA		+
chr7	43839825	TTATTATAGATATTATTATA	G	/	T	AAATGCAAGGGATTACTCAC	rs24399353	+
chr7	43841067	AATCCTTTGCCAGCGTTGAT	C	/	A	AAAAACAGCAAAGATTGCTA	rs24399354	+
chr7	43841377	TCCCAAAGCCCCTCTCCCCC	T	/	G	CCAAGTTTCCATCCTCCCTA		+
chr7	43841781	GTTGAGTGTGGTGACAGAGG	C	/	G	ATCAGCTCATCTCTTCACAC		+
chr7	43841787	TGTGGTGACAGAGGCATCAG	C	/	T	TCATCTCTTCACACCAGGCT		+
chr7	43841807	CTCATCTCTTCACACCAGGC	T	/	C	TTACAGGTCCCTGTCTTCCC	rs24399356	+
chr7	43841880	GTCTGGTCCAGGCACACAGA	G	/	A	TGGGCAGCAGGTGTTCCATG		+
chr7	43842285	CTTCTTCCATCATTGGAAAT	T	/	G	TGGAAAATGTGTGGGCTTTC	rs24399370	+
chr7	43842287	TCTTCCATCATTGGAAATTT	G	/	A	GAAAATGTGTGGGCTTTCAC		+
chr7	43842511	GCTAGCACGGTGTTTGAGGT	C	/	T	GTCTATACTGTGTGGTTGCA	rs24399371	+
chr7	43842925	CCTGAGCTGACTGATGGGGC	A	/	G	TACAACCCTGCAGTGCAGCC	rs24399372	+
chr7	43842935	CTGATGGGGCATACAACCCT	G	/	A	CAGTGCAGCCTCAGTTAGGG		+
chr7	43842956	CAGTGCAGCCTCAGTTAGGG	T	/	C	CTGCCTCTTGCACTAGAGGC		+
chr7	43843235	GAGGTGATTGGGTCATGAGG	A	/	G	TGGGACCCTCAGGAATGGGA		+
chr7	43843336	GGACACAAGGGGAAGACTGC	C	/	T	AGCCATGAACCAGGAGGCAG		+
chr7	43843544	TTAAGGGCAAGGAGGCCAGG	G	/	A	GAAGGACATCCCCCAGCTGG		+
chr7	43843614	AAGCCTTGTATACAAAGTTG	A	/	T	ATAGGCTTGTCTACATTTGT		+
chr7	43843721	TGGTGCCTGTGGCCCTGCTG	C	/	T	CAAGCAGAGAGCCTGGTGCA		+
chr7	43844090	CGCTAAGAACCTCTTTATTA	A	/	G	CCAGTCGTACACAAAGGAAT		+
chr7	43844265	GACCATTTTCTCTTTCACAC	G	/	T	AACAACCCAAGTTATTGAAG	rs24414018	+
chr7	43844603	ACACACACATAGTGAACAAA	G	/	A	CCTGTCTTCTAACTGTTTAA		+
chr7	43844808	GATGGCGGGCTTTTGTGGGG	G	/	T	CAGACCCGATGGGGTGTCAG		+
chr7	43844815	GGCTTTTGTGGGGGCAGACC	C	/	T	GATGGGGTGTCAGAGGCAAG		+
chr7	43845055	GGAGAGATGAATTCAACAGG	G	/	A	ATTTAAGGACCATGTGAGGC		+
chr7	43845244	AAAGGCTCAGCCTGAATTCT	C	/	T	TTATGACAAGAGTCACTTTT		+
chr7	43845487	GGAATTAGGAGTCATCACTA	C	/	T	GGTGGCCATAAAAAGTCTCC	rs24405929	+
chr7	43845694	CCTGCCCTACTTCCTTTCAT	C	/	G	TCCTGTGGTTTCTCTGCTAA	rs24405928	+
chr7	43845697	GCCCTACTTCCTTTCATCTC	C	/	T	TGTGGTTTCTCTGCTAAAGT	rs24405927	+
chr7	43845936	CTAGAGACCTGGGAAGTGGA	G	/	C	ACGGAAGTGGAGCACCCCGC	rs24405926	+
chr7	43845939	GAGACCTGGGAAGTGGAGAC	G	/	A	GAAGTGGAGCACCCCGCAGG	rs24405925	+
chr7	43846092	CATGTGATGGGCATGTGCCA	A	/	G	GAAGTGTTCCAGGTGCTAGA		+
chr7	43846094	TGTGATGGGCATGTGCCAAG	A	/	C	AGTGTTCCAGGTGCTAGAGA		+
chr7	43846418	CAACCACTGAGCCACCCAGG	T	/	C	GTCCCTGGCCTGGGATTCAG		+
chr7	43846639	ACTTATTTCTGCCTCCACTC	A	/	G	TTTCCAAAATAATTTGAGGC		+
chr7	43846769	AGTTGTCTGTCCTCAGTGTC	T	/	C	CCTCATCCAGGCCTGCCCTT		+
chr7	43846838	GCTGGTCAGCAGGTAACTAC	C	/	T	GAGCACCTGGACTTGTCCAG		+
chr7	43847315	GGTGAGACCTCAGGGGTGAG	T	/	C	GCTGGAGGCCCAGCACAGCC		+
chr7	43847473	CTCCATCTGATGAAGACACC	G	/	A	GAGCTCCCGTGGCCTCCATC		+
chr7	43847597	GCTCAGCAGGAAGCATTTGA	G	/	A	CCTCATTCTCTAGAGGAGCC		+
chr7	43847659	GGTTGTGGCCAACTGGGCTT	C	/	G	CTCACCTATGCTTCTGTCCT		+
chr7	43847707	CTCTTGTCTGGGCTGGTTCC	ACCTGGTC	/	ACTTG	CTGCAAGCTCTGGTTCTTCG		+
chr7	43847848	CGTTGAAGGAGACTCTGTGC	A	/	G	GCTGTTTCTGTTTCCAGCAC	rs24365286	+
chr7	43848556	GGCTGCCTGCCCCTGGATGC	C	/	T	CCTCTGTACTCCCCCTGCCG		+
chr7	43848618	GGGAAACCAAGGCAGTGCTG	G	/	A	GGCGGAGGCAGGCAGCTTCT		+
chr7	43849131	CGCTGCTCCTTCAGGACAGG	G	/	T	CTGCTGGCCCCAGGCCGCCT		+
chr7	43849218	GCTTCTCAGAAGCCCTTGGC	C	/	G	GCATTTCCGAAAACCAGCTG		+
chr7	43849287	CCTCAGGAAGAGGACCTCTG	T	/	C	GGTGTGAGGCCTGAGATTGA		+
chr7	43849451	TTATTGAGGGGAATGGGTAC	G	/	A	GTTCATGCTTATCCCCCAAT		+
chr7	43849511	CCACACCTTCCCTCTGGAAC	C	/	G	AGGGGGCACCCTGCCCTCTT		+
chr7	43849517	CTTCCCTCTGGAACCAGGGG	G	/	A	CACCCTGCCCTCTTTCTACT		+
chr7	43849872	CCCTCCCATGTGGGGTTGCC	T	/	C	GCACCCAGGGTGACAGCGCC		+
chr7	43849894	CACCCAGGGTGACAGCGCCA	C	/	T	GGCTGTCCTGGCTGGGGCCG		+
chr7	43850028	CCTTCTCTTGAAGCACATTC	G	/	A	CTTTATTTTCATTGTTTATC		+
chr7	43851343	GCTGCCCCCTGGAAACAAGC	T	/	C	GCTGTCTTGCTCAAATGACA		+
chr7	43851404	ACAAGGGCCCACACCGGCAG	A	/	G	CCCGGCGGTACCAAACGCGA	rs24401690	+
chr7	43851746	AGAAAAAAAAAGGGAAAAAA	G	/	T	TTAAACACCAGTGCTGAACT		+
chr7	43851935	AATCCCACTTGGCAGTGACA	C	/	T	GGACCTCTTTTCTCTTTGTT		+
chr7	43852175	AAAATATCAGTAACAACCTT	G	/	A	GGTTAGTCCTCCCCCGCCCC		+
chr7	43852628	TCCAGATGTATCTTCTAGCT	G	/	C	TGACTAAATCCTAAGCTTCC	rs24401693	+
chr7	43852792	TGCAAAGAAAACAAGGGTCA	T	/	C	GGTCCCTGGGTGGCTTTCCT		+
chr7	43852860	CTGAGGTCCTCGAAACAATA	T	/	G	AAATTTATTTTCTCACCATT		+
chr7	43853263	CCGAGTATTTTGGAAAATGA	G	/	A	GGAGTCATAGGCAACAAATG		+
chr7	43854157	CTCTAGGACTGGAGCGTGCT	T	/	G	TCCTGAGGGTGCTCTGTCAG		+
chr7	43854394	CTTTGCTTGTTAACGAAGCA	C	/	T	CCTTGGATTCATCCACTTCG		+
chr7	43854526	ACAGTCCAGAGGAAGGCGGA	T	/	C	TTAACCCAATAGCCTGACAA		+
chr7	43854598	ACAGGACAGAAGCAGGAGGC	T	/	A	CGGGCAGGGAGTGGGGGAGG		+
chr7	43854679	GCACAGGGCGGAGGTGTGAC	C	/	T	GAGGCCTCAGCTGGGGCAGG		+
chr7	43854848	TGGGCACACAACCGGTGGGG	C	/	T	TGCTGTCTTGATCCGGGTCC		+
chr7	43854868	CTGCTGTCTTGATCCGGGTC	C	/	T	TTTCAACACTTGCCCTTGTC		+
chr7	43855374	GGGGCAGGGGGTGGAGGCTG	T	/	C	AGGCCCTGGCCAGCTACAGA		+
chr7	43855694	CTGAGAAAATCCTGCCATGG	T	/	C	TGGCTCCCTCGGGGGCTGAG		+
chr7	43855923	TCTACTCTGCTGAGATATTA	G	/	A	TCAGAGCTCCTAGCTTGGGA		+
chr7	43855968	TTGGGGTGCCGCTTTGCTCT	C	/	G	GGGGTGAGTGGGAATGCAAG	rs24449561	+
chr7	43856520	TAGGTCTCACGTCCGCATGT	T	/	C	GGCTTTTTGCAGGGCTCCGG	rs24449560	+
chr7	43856613	AGATGAAAGCAAGTAATTAA	G	/	A	TCACAGAAGGAGCTAGATGA		+
chr7	43856698	GAAGGAAGATTGTTTCCGGG	G	/	A	TGGCTCCATGGAGGAGGAGG	rs24449559	+
chr7	43856768	GCATATGTGGGGTCAGGACA	T	/	C	GGCACGAGCCATGAGCCATG	rs24449558	+
chr7	43856954	ACCACCTCACCCTGCATGAG	T	/	C	ATGTTGCTCTTGAGCCAGGC	rs24449557	+
chr7	43856988	GCCAGGCCAAGCAACCTGTC	C	/	T	GGCGGGGCTCCCGGAGGTCA	rs24449556	+
chr7	43857000	AACCTGTCCGGCGGGGCTCC	C	/	T	GGAGGTCACATGTCCCCGAG	rs24449555	+
chr7	43857003	CTGTCCGGCGGGGCTCCCGG	A	/	C	GGTCACATGTCCCCGAGCTA	rs24449553	+
chr7	43857216	CATCTTCAAGGCAAGAGTGC	G	/	A	CGTGTCCAGGCAGGAGCTGG	rs24449549	+
chr7	43857366	GAGAGGAGTTTCTGCAGGGA	T	/	C	GGAGAACAAGATTGCCTCAT		+
chr7	43857755	GCCCCACGGGGGGAAGAGGC	A	/	G	GCGATGGGGTTCGGGGAGAA	rs24449546	+
chr7	43857994	TCAGGGATCAGCCACCAGCA	C	/	T	GGGTGGGGACTCTGCGGGGC		+
chr7	43858048	TCGGCTGAGGGGCCCGCGGC	A	/	G	GGAGCGGGCGTCCGGGGCGG		+
chr7	43858295	GCTGAAAGATGGTCGGAGGA	A	/	G	TGTTATCAGTCATGCCTTGA		+
chr7	43858420	TCCTTCCTCCCTGGCCGATC	C	/	T	CACCCTCCTCCTCCTCCTCC		+
chr7	43858768	GCCCATATGCTTTATGTGGG	C	/	T	AAGATTTCTATTTCAACCAA		+
chr7	43858823	CGTCCTTCTGTCACTATATT	T	/	C	GTTTCTCCTTCCTCCTCTTC		+
chr7	43859125	TCCCTCTGGACTGGGGCTCG	T	/	C	CTGAGCAAAGCAGGGGACAC		+
chr7	43859146	CTGAGCAAAGCAGGGGACAC	C	/	T	GTCACGTTGGTCTTGAGCCC		+
chr7	43859289	CCTTCACCCGATGCTCACCA	C	/	T	CCCTGACCGGTTAGTGCGTG		+
chr7	43859369	TTTCAGTGTCAGCGAGCAGG	C	/	T	GTGGAAGGTATTGTTTGGGA		+
chr7	43859988	TGTCTGGGGTATGAGTTATA	C	/	T	TAATCTTATTTTACCGATAA	rs24429854	+
chr7	43860003	TTATACTAATCTTATTTTAC	C	/	T	GATAAGGAAAGGTTAAGCGA	rs24429855	+
chr7	43860013	CTTATTTTACCGATAAGGAA	AGG	/	AG	TTAAGCGACTTGCCCAAAGC		+
chr7	43860140	GGGAGGGCCCTGCCTTCGTG	C	/	T	ACAGCAGCGGCTGCTGGAGG	rs9050606	+
chr7	43860286	CAGTAACTTGACGTGGGCCG	T	/	C	GGTGGGGGTGTTTACACCAC	rs24429856	+
chr7	43860423	AAGGGCAGGGCAGCGTCATG	G	/	A	TCGTGCATTCCAGCCTTGCG		+
chr7	43860426	GGCAGGGCAGCGTCATGGTC	G	/	A	TGCATTCCAGCCTTGCGAGG		+
chr7	43860464	AGGTAGGGATTAGGGAAGAC	G	/	A	GAATGGTCTGTCATTTCAGG		+
chr7	43860484	GGAATGGTCTGTCATTTCAG	G	/	T	AAACTCACTCTCTGGCAGAG		+
chr7	43860547	GGTGGAGGTGTGTGTGTGTG	G	/	T	GGGGGAGTGGGGGGTGGGTA		+
chr7	43860833	CCTTTGCCCACTGCCCGTCC	A	/	G	CCTCTTTACAGTCATCCTTC	rs24413924	+
chr7	43860985	CCTGCACGGATGGTTCAGAG	C	/	T	AAGCCAGGATGGCATTTCGC	rs24413918	+
chr7	43860999	TCAGAGCAAGCCAGGATGGC	A	/	G	TTTCGCCAGGGGCAGGTGGG		+
chr7	43861118	CCCCCCATCCCTGTTCCAGC	A	/	C	GTGCGTCCTGCTTCTGACTG	rs24413917	+
chr7	43861158	GCCTGTAGCCCCGGCCCCCA	C	/	T	GCTGCCCTGGAAAATTGCCT	rs24413916	+
chr7	43861434	GCTTTCCCGAGAGCTGCTGC	TGCTGCCA	/	CG	CGGGGGTCCTCGGGGTGGGT		+
chr7	43861431	CTTGCTTTCCCGAGAGCTGC	TGCTGCTGCCAC	/	TGCCGC	GGGGGTCCTCGGGGTGGGTG		+
chr7	43861477	TGGGTGCCCTGAGGGAGGAA	GGAGGCACCTGAG	/	GGAG	CCTTGGAGGGTGCTGGTGTG		+
chr7	43861553	CGTCTGGGTGGGAGGATTCT	T	/	C	TGCTTCACAGCAGAGCATGG	rs24413914	+
chr7	43861685	CGCCAGCTGCACATGGACCA	C	/	T	AAGACACCGCTGCGGCAGAG		+
chr7	43861708	GACACCGCTGCGGCAGAGGG	C	/	T	TTGATGGCCCCCAAAGATGT		+
chr7	43861934	AGGAGCCAAGGAGTGTCCCC	C	/	CA	CCCCCGGAGGACATGTCCCC		+
chr7	43861939	CCAAGGAGTGTCCCCCCCCC	C	/	CT	GGAGGACATGTCCCCTGGCA		+
chr7	43861977	GCACATCCGGAGAGAACTGG	A	/	C	CCTGCCATCCCTTTCATTCC		+
chr7	43862049	CTCCAGGACTGCAAGGGAAC	G	/	A	AGTTCGTATTGTTTTCAGCC		+
chr7	43862160	CAGGGCTGCTGGGGCATAGA	C	/	T	GATGCTCCCTGTAGGCCAGG	rs24407383	+
chr7	43862172	GGCATAGACGATGCTCCCTG	T	/	C	AGGCCAGGCTCTGTCTACCT	rs24407382	+
chr7	43862341	TAAGTGTCACTTCCATCTAA	A	/	G	TGACATTCCCATTATTCTGC	rs24407381	+
chr7	43862611	GGCATGTAACCTCCATCAGG	C	/	T	GGGGACTTGGTGTGCGTTCA		+
chr7	43862612	GCATGTAACCTCCATCAGGC	G	/	T	GGGACTTGGTGTGCGTTCAG		+
chr7	43862640	GGTGTGCGTTCAGCATTGTG	A	/	C	CCCATCACAGTGCCTGGCAC	rs24407380	+
chr7	43862664	ATCACAGTGCCTGGCACACA	C	/	T	AGGGTGCCTGGTGTATATTG	rs24407379	+
chr7	43862898	TACTGTCCTAACAGATTCTG	T	/	A	GTCATGAGGATTTTCTAGGT	rs24407378	+
chr7	43862953	AACAAGCCCGCCATGTGGGT	A	/	T	TATTATCCCTGTTTAAAAAG	rs24407377	+
chr7	43862954	ACAAGCCCGCCATGTGGGTA	T	/	C	ATTATCCCTGTTTAAAAAGG	rs24407375	+
chr7	43863029	TCAAGGTGGCAGAGCCTTGG	G	/	A	TGGTGGGAGTGAGTTTCAGA	rs24407362	+
chr7	43863206	TTCCTGCGATCACACCAGGA	C	/	G	GGTCTGTTGGCAGGGGCCTC	rs24407361	+
chr7	43863274	GCCCAGGAGGCCTCCTTCAT	A	/	G	CAACTGTCCCCTCCCGCTGT	rs24407360	+
chr7	43863289	TTCATACAACTGTCCCCTCC	C	/	T	GCTGTAATTGGACAACCCCA	rs24407359	+
chr7	43863392	GCACCTTGGTCACATGGCCG	TGGGG	/	TGGG	TTTTATGGCTTGATGAGCCA		+
chr7	43863521	TTATTAGTTTTCCCGCAGTG	A	/	G	GAGCTGCTCAGACGGAAGCT	rs24407358	+
chr7	43863574	GTGGCAAGCAGCCTCCCCCC	C	/	T	TACCCAAGACTCAAGGACAT	rs24407357	+
chr7	43863593	CCTACCCAAGACTCAAGGAC	ATCTTCT	/	ATCT	GAATGTAGGGTTGGAGAGAG		+
chr7	43863660	CCAGCTCAAGGCTTAGTGAG	G	/	A	CCAGGAGGCCAGCTCCTAGA	rs24407356	+
chr7	43863741	TGACAGGTCTAAAATGTTGT	C	/	T	ACCCCCCCCACACACACACA		+
chr7	43864298	TGTGGTTCCTTGAGAGAAGG	C	/	T	CTTTTGTCTTACTTACCTTT	rs24457191	+
chr7	43864328	TACTTACCTTTGTAACATAG	G	/	A	AGGTGCTCAAAGTTTATTGA		+
chr7	43864569	TGGATGGACAGATGGATGTG	C	/	T	GGTGATAGGGGACAGCCCAC	rs24424312	+
chr7	43864645	GGATTTCTGAGAAGAATGAA	A	/	G	CAAGACTTAAAAACAAGGTG	rs24424313	+
chr7	43864667	AAGACTTAAAAACAAGGTGT	TAGTCAG	/	TAG	GTAATGCAGCTAACTCACCT		+
chr7	43864771	CGAGGTCAGTGCCTCAGTTT	A	/	C	CCCAGTTTGCAGGGCAGGAG	rs24424314	+
chr7	43865036	CCACTGCCCTCTGTCCCTGC	T	/	C	CCCTCTCCTCCATGGCCCAG		+
chr7	43865059	CTCTCCTCCATGGCCCAGGC	G	/	A	TTCCTCTGAGACTCCAGCTG		+
chr7	43865265	GCTCTTCCTTTCCTAAGGCC	G	/	A	TTTCTTGGCCTCCTAAGGTG		+
chr7	43865315	AACACGATCCTACGCTCAGA	C	/	T	CCTCGGGGCCATGGCTTGTT		+
chr7	43865413	AGGCTGCAAAGCCTTGCTCA	C	/	T	CCTTCGAGAGCTCATTCTTT		+
chr7	43865905	GGTAGACTCCATTCCAATTG	C	/	T	TGGTCTGTGAGGAGCTGCAC	rs24372596	+
chr7	43865922	TTGCTGGTCTGTGAGGAGCT	G	/	A	CACGAGGCTTTGAGCTTTTC	rs24372598	+
chr7	43866746	GGGCAGGGTTTGACCTCAGG	A	/	G	CCACTGGTGTCCACTTCCCT	rs24451957	+
chr7	43866826	AGAACAGGTGTGCCACCATT	T	/	C	GGAAGTACAGGAGAGCGGGC		+
chr7	43866842	CATTTGGAAGTACAGGAGAG	C	/	T	GGGCTTCCACAGGTGGGCCG		+
chr7	43867252	GAGAGGACAGAGGCACAGGA	T	/	C	GCTGTCCCTGCTTGCAGGCT		+
chr7	43867762	CTGGCATGAAGCTCCTGGTG	CATCTCCCC	/	CCTT	TCACCTGTAGGCTTTCACCT		+
chr7	43867878	CCTTCCCTCTGCGACACGGG	C	/	G	CCACTGGCAGAGGGGGTTGC		+
chr7	43868045	GGTGGGCTGAGTCCCCTCTT	C	/	T	TTGGGGTTCTATCCTCCCAC		+
chr7	43868109	GGGACAGAAGGGAGGCCTGG	A	/	G	GGCTGTGAGTGTAGCCTCTC		+
chr7	43868122	GGCCTGGAGGCTGTGAGTGT	A	/	G	GCCTCTCCCAGCTTACTTTC	rs24389260	+
chr7	43868191	AGCCCCTTTGGCCTGCTCCT	G	/	T	TGTAAGGCTGGGTCTCTGGG	rs8493118	+
chr7	43868192	GCCCCTTTGGCCTGCTCCTG	T	/	C	GTAAGGCTGGGTCTCTGGGG	rs24389261	+
chr7	43868215	AAGGCTGGGTCTCTGGGGCA	T	/	G	GGAAGAGGTGGGGGTGGGGT	rs24389262	+
chr7	43868232	GCATGGAAGAGGTGGGGGTG	G	/	T	GGTGGGCCAGAGAAGATAAG		+
chr7	43868234	ATGGAAGAGGTGGGGGTGGG	G	/	T	TGGGCCAGAGAAGATAAGTC		+
chr7	43868543	CCTCCTATTAATCCAGGCAG	C	/	T	GGGGTTGGGGCTGCCATGCT		+
chr7	43868655	TCCAGGTTACAAATGCTCAT	A	/	G	CCATGTTTTAAATTACACCC		+
chr7	43868965	TTAATGTCAAGACCCTCCCC	C	/	A	CCCCACTTTAATGTCAAGAC		+
chr7	43868971	TCAAGACCCTCCCCCCCCCA	C	/	T	TTTAATGTCAAGACTAGGTT		+
chr7	43869040	GGCTAGACAGGAGTGAACTG	T	/	A	GGTGGATCCCAGGTCTGCCT	rs24406779	+
chr7	43869256	CGCTGGGGCTGGTGAGAGTG	A	/	T	GTCTGGATTGGCGTCCCCGA		+
chr7	43869975	GGGAAGTGAGAGGTGTGCAC	G	/	A	CTGCTTCCAGGCCCAGCCTC		+
chr7	43872276	TAAGCATTTTTTTCTGCTTT	G	/	A	ATTTTGTCTCCACAGGAGTA		+
chr7	43872378	GTCAGTTGTGCAAAGGAGAA	T	/	C	GTGCATCCTTGTAAATGCAC		+
chr7	43872629	CAGCATCTGGTTCTGCTGAC	C	/	T	TTTCCCCCTTCCTGCAGCTG		+
chr7	43872644	CTGACCTTTCCCCCTTCCTG	C	/	T	AGCTGTCTCTTCCCTTGGCT		+
chr7	43872648	CCTTTCCCCCTTCCTGCAGC	T	/	C	GTCTCTTCCCTTGGCTTCCA		+
chr7	43872649	CTTTCCCCCTTCCTGCAGCT	G	/	A	TCTCTTCCCTTGGCTTCCAT		+
chr7	43872687	CATGACCATTTCCCCTTGGT	T	/	C	CCCTACTGCTTAGGCCTCTC		+
chr7	43872970	CAAACCTCCTCATTCACACA	T	/	A	TATCCCATTTCATTCTCCAG		+
chr7	43873172	CAAGAGCAGAGCTGAGTTGA	G	/	C	AGAGGCCAGGCCAGGTCCTC		+
chr7	43873792	TAAAAAATCATCTCAGTCTT	CA	/	CAAACA	GTTTGTAGTCTAGTGGGAAA		+
chr7	43874803	GGCAGTCCTGAGCAGGGTGG	G	/	A	CTGGAGCTGAATGAGGACAT		+
chr7	43874969	GTTGTTCATTTCATAGAAGA	G	/	A	CCTTTTAGATGATTGTTAGA		+
chr7	43876333	GGGGTCTTTGAAGGTATATT	T	/	C	ATCCCCCAGTCTCCAGAGGA		+
chr7	43876535	GGCACCACTGAACAAAACCC	G	/	A	CCTGGACAATTACCTCTCCT		+
chr7	43876611	GCTAACAATTTCCTGTTCTA	G	/	T	CTCAGTTTCTCTGCTCAGCT		+
chr7	43876762	GTCCAGCAGAGCTGACCTCA	C	/	G	AATCCGGCTCCTAAGGTAGC		+
chr7	43876767	GCAGAGCTGACCTCACAATC	C	/	T	GGCTCCTAAGGTAGCAATGA		+
chr7	43876827	AACATTTTATAATAAATTTC	A	/	G	GGCCAAAAGTGAACTACAGG		+
chr7	43876865	AGGAGGGCCATATGTGCTCA	C	/	CCT	TCCAGTTGCTTTGGAAACTC		+
chr7	43876987	AATCAGATCAGAAAGCGCTC	A	/	G	TTAAAGTAGCTCAGAGAGGC		+
chr7	43876995	CAGAAAGCGCTCATTAAAGT	AG	/	AATCCGA	CTCAGAGAGGCAGAGAAATA		+
chr7	43877007	ATTAAAGTAGCTCAGAGAGG	CAGAGA	/	CAGAGAGAGA	AATAGGAATCTGAAGTTGCC		+
chr7	43877133	CTACAGAAGCTACAGTTTTA	C	/	A	TCTGAGAGAAAAAATGGATT		+
chr7	43877419	TCCCATTTTCTCTTTCCAGA	A	/	T	TTTTTTTTTGCAAACAAAAT		+
chr7	43877521	GTACTTTATAATTTGTACTT	C	/	T	TATATTTATAATAACTAGGT		+
chr7	43877757	AAAACCAGTGAAAAGGCAAC	A	/	G	TAAACTAATGGGATATAGAT		+
chr7	43878744	TGCTTGTTGCCCATGTCTAG	G	/	T	TCTTCCTCTGTGAGATTTCT		+
chr7	43878768	TCCTCTGTGAGATTTCTGTT	C	/	T	ATGTCTGATTTCAGGTTGTA		+
chr7	43878930	AAAGGAGGAAAGACTATCCA	C	/	A	TGGAAAAAAGACAGTCTCTT		+
chr7	43879015	TGAAACTAGACCACTCTCTT	T	/	G	CACCATACACAAAGATAAAC		+
chr7	43879186	CAAAAGCAAAAATGAACTAT	TGG	/	TGGG	ACTTCATCAAGATAAGAAGC		+
chr7	43879284	AGAAGATATTTGCAAATGAC	G	/	A	TATCAGATGAAGGGCTAGTT		+
chr7	43879570	GCTTTTGGTAATAGGACTTG	G	/	A	GCGCCATGGGGATCCAGATT		+
chr7	43879727	AAGTAACGTTTTTAACTTAT	A	/	T	AAAAGGTGTATCTTGTCTGC		+
chr7	43879934	TGTTTGAAATAGGGGAAAAT	G	/	A	TAACACATGGACTTAGGCAG		+
chr7	43880429	AGTGAGTAAGCTCATGAGTG	G	/	T	CAGTGACCAGCAAGGGGATG		+
chr7	43882038	ATAATGAAGTGCTTATCACA	A	/	G	ATACAACTAAAAATAACCCA		+
chr7	43882120	CAGGGTAATATCCACCTCTA	G	/	A	CTTGGACATTGAGAAGTGCC	rs24400543	+
chr7	43882195	CTAGAGAAACACACACACAC	T	/	A	TACATGCACACGGGAGTGGG		+
chr7	43882250	ATCTCATGCCATTGTGAGGG	T	/	C	TGGCAAGTCTGAAATGCACA		+
chr7	43882363	TTCTCAGGGAACTGTCTTTT	A	/	T	TCTTAAGTTCTTCGACTGAT		+
chr7	43882382	TATCTTAAGTTCTTCGACTG	A	/	G	TTGGATGAGGCCCACCCATA		+
chr7	43882555	AAGCAGGCCCCATGCAGGGA	G	/	T	CCCAACACAGGACTCGATCC		+
chr7	43882762	GCTTGGCCAAGTTGACACAT	T	/	C	AAATCAACCATCACAGAATC		+
chr7	43882801	TCCATACTTCTCAGAAGAGA	T	/	C	GTCATGCTAGTCCATTTGTT		+
chr7	43882927	TTGTTTGTTTGGTTTTTGTT	CTTTTT	/	CTTTTTT	GGAGACAGAGAGAGTGAGTG		+
chr7	43882959	AGAGAGAGTGAGTGCAAGTG	C	/	T	GAGGGGCAGAGGGAGAGAGA		+
chr7	43883033	CTTGACACAGGGTTCAATCT	C	/	T	ACAACCATGAGATCATGACC		+
chr7	43883076	AGCTGAAATTAAGAGTCACA	C	/	T	TCTCAACCAACTGAGTCACT		+
chr7	43883158	TTACAATTGACCACCGTCCC	C	/	G	CATCTGAGTCCTCCATCATT		+
chr7	43883431	GCCAGTCCTGGGTGGCCAGT	G	/	A	ACATGGACATAATCATATTT		+
chr7	43883450	TGACATGGACATAATCATAT	T	/	A	TGAAGAGATTTTGTTTGTTC		+
chr7	43883481	TTGTTTGTTCTCTTGAGTTT	C	/	T	TAGAAAAGCCTTTGCTTTCC		+
chr7	43883533	ATAGATTTGGCACTTCTGGA	T	/	C	CTAATGATGTAAGAAACTTT		+
chr7	43883563	TAAGAAACTTTTGTCTCTCC	T	/	C	ACAAAATATGATAAAAACTT		+
chr7	43883585	CAAAATATGATAAAAACTTA	G	/	A	GGCAGAATATACAATCCAAT		+
chr7	43883683	ACTCAAAGAATGAAAAAAAA	A	/	C	CCCTCAAAGAATGACGAAAC		+
chr7	43883834	CTAATGGACTGGGAAGGAGG	A	/	C	TCCTATAGGATAGAAAGTGG		+
chr7	43884087	GAGCAGTAATGCCCATTTTC	C	/	T	TCTCTCTTTTCTCTTGCTAT		+
chr7	43884280	TTGGGGTCATTTCTGGGCTG	T	/	C	GCATGCATGAAAATCACCCA		+
chr7	43884421	CTAACATTGGAACCACAACC	C	/	T	TAGGAAAGCAGGTCAGGACC		+
chr7	43884428	TGGAACCACAACCCTAGGAA	A	/	G	GCAGGTCAGGACCTGCGTTC		+
chr7	43884444	GGAAAGCAGGTCAGGACCTG	C	/	G	GTTCTGTACTTAACCAGGTT		+
chr7	43884779	TGGAGAAAGAGAGCCTCTAA	G	/	A	ATAAACAAAGGGAAATTCTG		+
chr7	43884875	GAAGAATGGAGATGATGAAT	A	/	G	GGAAACATGAGCAAGATAAA		+
chr7	43885178	GACGAAATTCAACATTCTCT	C	/	T	ATGAAACAAACACTAAGCAA		+
chr7	43885259	TTTACAAAAAGCCTACAGAT	C	/	A	ACATCGTACTTAATGATGAA	rs24405995	+
chr7	43885801	AATTTATGGGTTGGAAGCCT	T	/	C	AGTATCATTTGTGATATCAA		+
chr7	43886003	AATGTAGGATGTACTATGAC	G	/	A	TTATAATAATCATGACAGTA		+
chr7	43886180	AGTGATGGTAGAACAATTGA	T	/	C	ATTCATATGCAAAAAATTGA		+
chr7	43886328	ATCTTTGTGACTTTGGGTTA	T	/	G	GCAGCTAAACACGAACAGCA		+
chr7	43887086	AAACCACAATGAGAAAACCC	A	/	T	ACACACCTACCAGAATGGCT		+
chr7	43887154	CAACCCCTGACCATGCCCAG	A	/	G	GGTAGTGAGGATACAGAACT		+
chr7	43887234	GCATGACCTCTCTAGAAAAT	G	/	A	GTTTGATAGTTCCATATTAA		+
chr7	43887371	ATGTTGCCAGCAGAGTTACT	C	/	T	AGAATTGCCCTAAACTAGAA		+
chr7	43887481	ATAAATGGGAAAGAACTAGT	T	/	A	ATATGTGCAACAACTTGAAT	rs24424066	+
chr7	43887658	GGGGAGCCTGAGGGGATGGG	G	/	T	GGCGGGCAGCCAGTGAACTG		+
chr7	43887903	TGGAGGCCAGAGGCCAAGAG	G	/	T	TCCAGGCTGGTCAGGGAAGG	rs24371544	+
chr7	43888007	GAAGGCTTCCACACCGCAGG	C	/	T	AGGGGGTAAGGGGCTGCCTT	rs9149202	+
chr7	43888220	GTCTGTCAGCTACAGTTGGT	C	/	T	GCCTATAGGACACACGTGGA		+
chr7	43888785	TTCAACTGTCCAAGGACACC	G	/	A	AGGCTCCTTCCACAGTTTGG		+
chr7	43889582	GGTACTACACAGATCTTGGG	G	/	A	AGGAACAGCCCCAAAATAAA		+
chr7	43889722	ACCATCTGTTTAGCCTTTGC	A	/	G	CATGGCAGATGTTAATCAGA	rs8741345	+
chr7	43889976	GGAGGAGACGGAGAGGTCCT	C	/	T	GCCACGTCCCCTTCCTCCTC	rs8741344	+
chr7	43889981	AGACGGAGAGGTCCTCGCCA	C	/	A	GTCCCCTTCCTCCTCCTTGG		+
chr7	43890039	AGCCAGGCTGACCTCTTGTT	C	/	G	ACTTATTCCTCCTCTCCGAA		+
chr7	43890193	GAGAAAAGAAGCAAGTGGTC	T	/	C	CAAGAATCAGTATATAATCA		+
chr7	43890229	AATCATTAGCTGTGCTAAGG	C	/	G	TTGTGAGGGAAGTTAGACGG	rs24441081	+
chr7	43890269	GTGCTGGGAGAGGAGACAGA	GATTGC	/	GGCA	TGGGCTTAGTCTAGAGGTTT		+
chr7	43891117	TGGGAGTGGGTGGTGCAGAG	T	/	G	GGCTCCCAGGAGGGTGGGGG	rs24426298	+
chr7	43891136	GTGGCTCCCAGGAGGGTGGG	G	/	A	GGCACTAGGAAGAGAGAGAC		+
chr7	43891362	GCCTTGAGACTCCAGGCCAA	C	/	T	CTGGGTTCTCTAAGCCTGTC	rs24426300	+
chr7	43892004	TAAGTAAACCAAGGCTTTCT	T	/	C	TGGATTTTCCTAGTTTTTCC		+
chr7	43892668	GCAGGAGGTGAGGAGAAGAA	G	/	A	CGGGAAGGCAGAGGGGTGAC	rs24429755	+
chr7	43892669	CAGGAGGTGAGGAGAAGAAG	C	/	T	GGGAAGGCAGAGGGGTGACC		+
chr7	43892713	ACAGAGCAAGTGTGCTCGGC	G	/	T	GGGCTGGAGGAGCAGGCTAA	rs24429754	+
chr7	43892855	TCTATGAAGCACTCGTTCAG	G	/	T	TTAGGGATACAGTCTGTGGC	rs24429753	+
chr7	43892896	CATGAAAGGGAGGCTGGCTG	C	/	T	TTGGCCTGTGTGGTTCATAG	rs24429752	+
chr7	43892969	CACTAGATGGTCAGAAAACC	C	/	G	ATTCAAGCAATTGTTAAACT	rs24429750	+
chr7	43893735	TTTTTTGTGCTCTGGGCGCC	T	/	G	TTGGCAAAACAGGGTTTCCT		+
chr7	43893802	GAACGGGGATGGGAGGGAGT	G	/	A	GGTAAAGGTTGGTGGTGGTG		+
chr7	43893827	AAGGTTGGTGGTGGTGGTGG	T	/	G	GGGGGGGGATGTCAGAAAGC		+
chr7	43893954	CCCTATGGACACTCAAGGCC	G	/	T	CCTCTCCTCTCACAGATTAA		+
chr7	43894115	CAGTGGAAGAGTTGGTCTGG	C	/	T	CTTAATGGGAACCATCACAT	rs8926587	+
chr7	43894122	AGAGTTGGTCTGGCCTTAAT	G	/	T	GGAACCATCACATATCCTCC	rs8926586	+
chr7	43894513	TATTGTATCAAGCATGTTTT	A	/	G	TTAGGCTCCCATGTCACAGA		+
chr7	43894676	CATTTGTCTTTCAAGGCCTA	C	/	T	ATCACATGGTATCTTCCCCA		+
chr7	43895811	TTCAGAGTGGGTCTTCTCAG	G	/	A	GCTAGGGGAGGGGATGTTAA	rs24427315	+
chr7	43898955	GATCTACATTACAATTCCTC	T	/	C	TTTAGTATATAATTTCTGTC	rs24459688	+
chr7	43908223	AGGAGTACAGACCACTGCCC	A	/	G	TGAATTATCCTGGCCAATGT	rs24384467	+
chr7	43923643	CTAGCAAAGGGCAAAAAAAA	T	/	A	TTTTGCTGAAGGAATACAAT	rs24436157	+
chr7	43926559	TGGCTCTTCCAGGAAACCTT	T	/	C	CCCAACCTAGAAGAGAGAAG	rs24389880	+
chr7	43928321	CTCAGATGAACGTCAGCTAA	C	/	T	TGATCCTCTGGCATCTCTGT	rs8655257	+
chr7	43937928	TGCACCATCAAGTAGAAAAG	T	/	A	GGTCTAGCAGATGAGGGTTG	rs8598052	+
chr7	43940946	AGAGCTTCTTGCCCAGCTGC	C	/	T	CTGAAAAAGTAAATCCTCTC	rs24384356	+
chr7	43948370	AACCCAAGAGACGTTATCCC	C	/	T	AGGATGTATGTGCCTGGAGC	rs8836294	+
chr7	43967633	AAGTTAAGAATCTGGGCAAG	C	/	T	CCACGCACCAGGACCTTAGC	rs24436663	+
chr7	43975061	CAGAGTCAGCTTGGGTGTCA	G	/	A	GAATCAGGTCACCAAACTCT	rs9184289	+
chr7	43976137	CTTTTGGCGTTAACAGCGCA	C	/	T	TTCTCCATCCAGAACAAGGA	rs24438645	+
