# Supplementary material for: Derived variants at six genes explain nearly half of size reduction in dog breeds
Source: HighWire-hosted journal article supplement (doi:10.1101/gr.157339.113), 2013-09-11
Supplement: Supplemental_TableS3.xlsx [file Supplemental_TableS3.xlsx]

## Sheet: chr4_67Mb
Supplementary Table 3. Sanger fine-mapping genotypes.
chr4:67Mb
Sample ID	Breed name	Standard breed weight (lbs)	ln(Standard breed weight (lbs))	Sex	chr4_66956100	chr4_66963299	chr4_66963304	chr4_66963320	chr4_66963380	chr4_66966558	chr4_66971377	chr4_66971486	chr4_66971496	chr4_66971562	chr4_66971586	chr4_66971631	chr4_66971775	chr4_66977832	chr4_66984442	chr4_66986126	chr4_66986160	chr4_66987594	chr4_66987601	chr4_66987701	chr4_66994856	chr4_67006439	chr4_67006452	chr4_67009707	chr4_67009752	chr4_67010167	chr4_67017806	chr4_67017850	chr4_67018122	chr4_67020674	chr4_67021318	chr4_67021393	chr4_67021801	chr4_67021816	chr4_67022822	chr4_67023946	chr4_67024057	chr4_67024675	chr4_67029454	chr4_67029495	chr4_67032644	chr4_67032720	chr4_67032976	chr4_67033073	chr4_67034223
CHIH_01	Chihuahua	4	1.38629	male	TT	TT	GG	CC	CC	CC	AA	CC	GG	CC	AA	GG	AA		CC	AA	II	DD	GG	CC	CC	GG	AA	TT	II	TT	GG	GG	AA	CC	GG	AA				TT			II	CC	AA	TT	AA	TT	AA
YORK_10	Yorkshire Terrier	5.5	1.70475	female	TT	TT	GG	TT	TT	CC	AA	CC	GG	CC	AA	GG	AA	TT		GG	DD	DD	GG	TT	CC	GG	AA	TT	II	TT	GG	GG	AA	CC	GG	AA				TT			II	CC	AA	TT	AA	TT	AA
PAPI_09	Papillon	6.1	1.80829	female	TT	TT	GG	CC	CC	CT	AA	CC	AG	CC	AG	GG	AC	GG	CC	AA		DD	GG	CC	CC	GG	AG	CT	II	CT	GT	AG	AG	CT	GT	AG				CC			II	AC	AC	AT	AG	CT	AT
BRUS_05	Brussels Griffon	9	2.19722	female	TT	TT	GG	CC	CC	CC	AA	CC	GG	CC	AA	GG	AA		CC	AA	II	DD	GG	CC	CC	GG	AA	TT	II	TT	GG	GG	AA	CC	GG	AA				TT			II	CC	AA	TT	AA	TT	AA
MPIN_09	Miniature Pinscher	9	2.19722	male	GT	TT	AG	CT	CT		AA	CC	AG	CC	AA	GG	AC	GT	CG	AG	DI	DD	GG	CT	CT	GG	AA	CT	II		GT	AG	AG	CT	GG	AA				CT			II	AC	AC	AT	AA	TT
PEKE_13	Pekingese	9.5	2.25129	male	TT	TT	GG	TT	TT	CC	AA	AA	GG	CC	AA	GG	AA	TT		GG	DD	DD	GG	TT	CC	GG	AA	TT	II	TT	GG	GG	AA	CC	GG	AA				TT			II	CC	AA	TT	AA	TT	AA
CHIH_09	Chihuahua	4	1.38629	female																																	TT	TT	TT		AA	CC
MALT_09	Maltese	5	1.60944	female																																	TT	TT	TT		AA	CC
POM-_14	Pomeranian	5	1.60944	male																																	TT	TT	TT		AA	CC
YORK_02	Yorkshire Terrier	5.5	1.70475	female																																	TT	TT	TT		AA	CC
PAPI_18	Papillon	6.1	1.80829	male																																	GT	CT	CT		AG	CT
AFFN_05	Affenpinscher	7.5	2.0149	female																																	TT	TT	TT		AA	CC
BORZ_13	Borzoi	82.5	4.4128	female	TT	TT	GG	CC	CC	CC	AA	CC	GG	CC	AA	GG	AA		CC	AA	II	DD	GG	CC	CC	AA	AA	TT	DD	TT	GG	GG	AA	CC	GG	AA				TT			II	CC	AA	TT	AA	TT	AA
ANAT_06	Anatolian Shepherd Dog	115	4.74493	female	TT	TT	GG	CT	CT	CC	AA	CC	GG	CC	AA	GG	AA	TT			DI	DD	GG	CT	CC	GG	AA	TT	DI		GG	GG	AA	CC	GG	AA				CT			II	CC	AA	TT	AA	TT	AA
NEWF_13	Newfoundland	125	4.82831	male	TT	CT	GG	CC	CT	CT	AG	CC	GG	CT	AA	AG	AA	GG		AA		DI	AG	CC	CC	GG	AA	TT	DI	TT				CC	GG	AA				TT			II	CC	AA	TT	AA	TT	AA
DANE_16	Great Dane	136	4.91265	female	TT	TT	GG	TT	TT	CC	AA	CC	GG	CC	AA	GG	AA	TT	GG	GG	DD	DD	GG	TT	CC	GG	AA	TT	II	TT	GG	GG	AA	CC	GG	AA				CC			DD	CC		TT	GG	CC	TT
IWOF_15	Irish Wolfhound	146.9	4.98975	unknown		TT	GG	CT	CT	CC	AA							TT	CG			DD	GG	CT	CC	GG	AA	TT	II	TT	GG	GG	AA	CC	GG	AA				CC			DI	CC	AA	TT	GG	CC	TT
MAST_12	Mastiff	182.5	5.20675	female	TT	TT	GG	CC	CC	CT	AA	CC	AG	CC	AG	GG	AC	GG	CC	AA	II	DD	GG	CC	CC	GG	AA	TT	II	TT	GG	GG	AA	CC	GG	AA				CC			II	CC	AA	TT	GG	CC	TT
LEON_16	Leonberger	92.5	4.52721	female																																	TT	TT	TT		AA	CC
GPYR_15	Great Pyrenees	92.5	4.52721	male																																	TT	TT	TT			CC
AKBA_01	Akbash Dog	105.5	4.65871	male																																	TT	TT	TT		AA	CC
DANE_18	Great Dane	136	4.91265	male																																	TT	TT	TT		AA	CC
IWOF_21	Irish Wolfhound	146.9	4.98975	female																																	TT	TT	TT		AA	CC
MAST_19	Mastiff	182.5	5.20675	male																																	TT	TT	TT		AA	CC
CHIH_08	Chihuahua	4	1.38629	female
CHIH_10	Chihuahua	4	1.38629	female
CHIH_11	Chihuahua	4	1.38629	female
MALT_05	Maltese	5	1.60944	female
MALT_06	Maltese	5	1.60944	female
MALT_07	Maltese	5	1.60944	male
MALT_08	Maltese	5	1.60944	male
MALT_10	Maltese	5	1.60944	male
POM-_15	Pomeranian	5	1.60944	female
POM-_16	Pomeranian	5	1.60944	female
POM-_17	Pomeranian	5	1.60944	female
POM-_18	Pomeranian	5	1.60944	female
POM-_19	Pomeranian	5	1.60944	female
POM-_20	Pomeranian	5	1.60944	male
POM-_21	Pomeranian	5	1.60944	female
YORK_05	Yorkshire Terrier	5.5	1.70475	female
YORK_07	Yorkshire Terrier	5.5	1.70475	male
YORK_09	Yorkshire Terrier	5.5	1.70475	male
YORK_11	Yorkshire Terrier	5.5	1.70475	female
YORK_12	Yorkshire Terrier	5.5	1.70475	female
YORK_13	Yorkshire Terrier	5.5	1.70475	male
YORK_14	Yorkshire Terrier	5.5	1.70475	female
PAPI_05	Papillon	6.1	1.80829	female
PAPI_07	Papillon	6.1	1.80829	male
PAPI_08	Papillon	6.1	1.80829	male
PAPI_13	Papillon	6.1	1.80829	male
PAPI_14	Papillon	6.1	1.80829	female
PAPI_15	Papillon	6.1	1.80829	male
PAPI_16	Papillon	6.1	1.80829	male
PAPI_19	Papillon	6.1	1.80829	female
PAPI_20	Papillon	6.1	1.80829	male
PAPI_21	Papillon	6.1	1.80829	female
PAPI_22	Papillon	6.1	1.80829	female
PAPI_23	Papillon	6.1	1.80829	female
PAPI_24	Papillon	6.1	1.80829	male
AFFN_06	Affenpinscher	7.5	2.0149	female
AFFN_07	Affenpinscher	7.5	2.0149	male
AFFN_08	Affenpinscher	7.5	2.0149	male
AFFN_09	Affenpinscher	7.5	2.0149	male
AFFN_10	Affenpinscher	7.5	2.0149	female
AFFN_11	Affenpinscher	7.5	2.0149	male
AFFN_12	Affenpinscher	7.5	2.0149	female
CHIN_07	Japanese Chin	7.5	2.0149	female
CRES_05	Chinese Crested	8.5	2.14007	male
CRES_06	Chinese Crested	8.5	2.14007	female
CRES_07	Chinese Crested	8.5	2.14007	female
CRES_08	Chinese Crested	8.5	2.14007	male
CRES_09	Chinese Crested	8.5	2.14007	female
CRES_10	Chinese Crested	8.5	2.14007	female
CRES_11	Chinese Crested	8.5	2.14007	male
CRES_12	Chinese Crested	8.5	2.14007	male
CRES_13	Chinese Crested	8.5	2.14007	female
CRES_14	Chinese Crested	8.5	2.14007	female
CRES_15	Chinese Crested	8.5	2.14007	male
CRES_16	Chinese Crested	8.5	2.14007	female
CRES_17	Chinese Crested	8.5	2.14007	male
CRES_18	Chinese Crested	8.5	2.14007	female
BRUS_06	Brussels Griffon	9	2.19722	female
BRUS_07	Brussels Griffon	9	2.19722	female
MPIN_08	Miniature Pinscher	9	2.19722	male
MPIN_10	Miniature Pinscher	9	2.19722	female
MPIN_15	Miniature Pinscher	9	2.19722	male
MPIN_16	Miniature Pinscher	9	2.19722	female
MPIN_17	Miniature Pinscher	9	2.19722	female
MPIN_18	Miniature Pinscher	9	2.19722	female
MPIN_19	Miniature Pinscher	9	2.19722	female
MPIN_20	Miniature Pinscher	9	2.19722	male
MPIN_21	Miniature Pinscher	9	2.19722	female
MPIN_22	Miniature Pinscher	9	2.19722	female
MPIN_23	Miniature Pinscher	9	2.19722	female
MPIN_24	Miniature Pinscher	9	2.19722	male
BICH_06	Bichon Frise	9.5	2.25129	female
BICH_07	Bichon Frise	9.5	2.25129	male
MNTY_01	Manchester Terrier (Toy)	9.5	2.25129	female
MNTY_02	Manchester Terrier (Toy)	9.5	2.25129	female
MNTY_03	Manchester Terrier (Toy)	9.5	2.25129	male
PEKE_15	Pekingese	9.5	2.25129	female
PEKE_16	Pekingese	9.5	2.25129	male
PEKE_17	Pekingese	9.5	2.25129	male
PEKE_18	Pekingese	9.5	2.25129	male
SILK_09	Silky Terrier	10	2.30259	male
SILK_10	Silky Terrier	10	2.30259	female
SILK_11	Silky Terrier	10	2.30259	female
ITGY_06	Italian Greyhound	11.3	2.4248	female
ITGY_07	Italian Greyhound	11.3	2.4248	female
ITGY_08	Italian Greyhound	11.3	2.4248	male
ITGY_09	Italian Greyhound	11.3	2.4248	female
ITGY_10	Italian Greyhound	11.3	2.4248	female
TIBS_01	Tibetan Spaniel	12	2.48491	female
TIBS_02	Tibetan Spaniel	12	2.48491	female
HAVA_13	Havanese	12.1	2.49321	male
HAVA_14	Havanese	12.1	2.49321	female
BORT_05	Border Terrier	13.5	2.60269	male
BORT_06	Border Terrier	13.5	2.60269	female
BORT_07	Border Terrier	13.5	2.60269	female
BORT_08	Border Terrier	13.5	2.60269	female
BORT_09	Border Terrier	13.5	2.60269	male
BORT_10	Border Terrier	13.5	2.60269	female
BORT_11	Border Terrier	13.5	2.60269	female
BORT_12	Border Terrier	13.5	2.60269	male
BORT_13	Border Terrier	13.5	2.60269	female
BORT_14	Border Terrier	13.5	2.60269	female
CAIR_05	Cairn Terrier	13.5	2.60269	female
CAIR_06	Cairn Terrier	13.5	2.60269	female
CAIR_07	Cairn Terrier	13.5	2.60269	female
CAIR_08	Cairn Terrier	13.5	2.60269	female
CAIR_09	Cairn Terrier	13.5	2.60269	male
CAIR_10	Cairn Terrier	13.5	2.60269	female
CAIR_11	Cairn Terrier	13.5	2.60269	male
CAIR_12	Cairn Terrier	13.5	2.60269	male
CAIR_13	Cairn Terrier	13.5	2.60269	female
CAIR_14	Cairn Terrier	13.5	2.60269	male
CKCS_05	Cavalier King Charles Spaniel	15.5	2.74084	female
CKCS_06	Cavalier King Charles Spaniel	15.5	2.74084	male
CKCS_07	Cavalier King Charles Spaniel	15.5	2.74084	male
CKCS_08	Cavalier King Charles Spaniel	15.5	2.74084	male
CKCS_09	Cavalier King Charles Spaniel	15.5	2.74084	female
CKCS_10	Cavalier King Charles Spaniel	15.5	2.74084	female
CKCS_11	Cavalier King Charles Spaniel	15.5	2.74084	female
CKCS_12	Cavalier King Charles Spaniel	15.5	2.74084	female
CKCS_13	Cavalier King Charles Spaniel	15.5	2.74084	female
MANT_01	Manchester Terrier (Standard)	17	2.83321	male
MANT_02	Manchester Terrier (Standard)	17	2.83321	female
AUST_13	Australian Terrier	18.5	2.91777	female
AUST_14	Australian Terrier	18.5	2.91777	female
BEDT_01	Bedlington Terrier	20	2.99573	female
SSHP_10	Shetland Sheepdog	22.1	3.09558	female
SSHP_11	Shetland Sheepdog	22.1	3.09558	female
BEAG_06	Beagle	24	3.17805	female
BEAG_17	Beagle	24	3.17805	female
BEAG_18	Beagle	24	3.17805	female
BEAG_19	Beagle	24	3.17805	female
BEAG_20	Beagle	24	3.17805	male
FBUL_07	French Bulldog	25	3.21888	male
ECKR_06	English Cocker Spaniel	30	3.4012	male
ECKR_07	English Cocker Spaniel	30	3.4012	female
CARD_06	Cardigan Welsh Corgi	31.8	3.45947	male
PBGV_05	Petit Basset Griffon Vendeen	35.5	3.56953	male
PBGV_06	Petit Basset Griffon Vendeen	35.5	3.56953	female
BORD_06	Border Collie	39.5	3.6763	female
BORD_07	Border Collie	39.5	3.6763	male
SALU_11	Saluki	43	3.7612	female
SALU_12	Saluki	43	3.7612	female
HUSK_06	Siberian Husky	47.5	3.86073	female
DALM_05	Dalmatian	52.5	3.96081	male
DALM_06	Dalmatian	52.5	3.96081	female
AFGH_08	Afghan Hound	55	4.00733	male
GSHP_05	German Shorthaired Pointer	57.5	4.05178	male
GSHP_06	German Shorthaired Pointer	57.5	4.05178	female
BULT_01	Bull Terrier	60	4.09434	female
KEES_01	Keeshond	60.5	4.10264	female
TURV_01	Belgian Tervuren	62	4.12713	female
BOX-_08	Boxer	62.5	4.13517	male
BOX-_09	Boxer	62.5	4.13517	male
COLL_07	Collie	62.5	4.13517	female
AMST_05	American Staffordshire Terrier	64.3	4.16356	female
GOLD_09	Golden Retriever	65	4.17439	male
GOLD_10	Golden Retriever	65	4.17439	female
GOLD_11	Golden Retriever	65	4.17439	female
GOLD_12	Golden Retriever	65	4.17439	female
GOLD_13	Golden Retriever	65	4.17439	male
GREY_08	Greyhound	65	4.17439	female
GREY_10	Greyhound	65	4.17439	female
GREY_11	Greyhound	65	4.17439	female
LAB-_06	Labrador Retriever	67.5	4.21213	female
LAB-_08	Labrador Retriever	67.5	4.21213	male
LAB-_09	Labrador Retriever	67.5	4.21213	female
GSNZ_08	Giant Schnauzer	73.5	4.29729	female
BOUV_01	Bouvier des Flandres	74	4.30407	female
BRIA_08	Briard	75	4.31749	male
DOBP_10	Doberman Pinscher	77	4.34381	male
DOBP_11	Doberman Pinscher	77	4.34381	female
DOBP_12	Doberman Pinscher	77	4.34381	female
AMAL_01	Alaskan Malamute	80	4.38203	female
AMAL_02	Alaskan Malamute	80	4.38203	female
AMAL_03	Alaskan Malamute	80	4.38203	female
AMAL_04	Alaskan Malamute	80	4.38203	male
AMAL_05	Alaskan Malamute	80	4.38203	female
AMAL_06	Alaskan Malamute	80	4.38203	male
AMAL_07	Alaskan Malamute	80	4.38203	female
BORZ_12	Borzoi	82.5	4.4128	male
BORZ_14	Borzoi	82.5	4.4128	male
BORZ_15	Borzoi	82.5	4.4128	female
BORZ_16	Borzoi	82.5	4.4128	male
GSD-_09	German Shepherd Dog	85	4.44265	female
GSD-_10	German Shepherd Dog	85	4.44265	female
GSD-_11	German Shepherd Dog	85	4.44265	male
BMD-_07	Bernese Mountain Dog	88.5	4.483	female
BMD-_08	Bernese Mountain Dog	88.5	4.483	male
BMD-_09	Bernese Mountain Dog	88.5	4.483	male
BMD-_10	Bernese Mountain Dog	88.5	4.483	female
BMD-_11	Bernese Mountain Dog	88.5	4.483	female
BMD-_12	Bernese Mountain Dog	88.5	4.483	female
BMD-_13	Bernese Mountain Dog	88.5	4.483	female
BMD-_14	Bernese Mountain Dog	88.5	4.483	male
BMD-_15	Bernese Mountain Dog	88.5	4.483	male
KOMO_01	Komondor	90	4.49981	female
AKIT_16	Akita	92.5	4.52721	female
AKIT_17	Akita	92.5	4.52721	female
AKIT_18	Akita	92.5	4.52721	female
AKIT_20	Akita	92.5	4.52721	female
AKIT_21	Akita	92.5	4.52721	male
AKIT_22	Akita	92.5	4.52721	male
AKIT_23	Akita	92.5	4.52721	male
AKIT_25	Akita	92.5	4.52721	female
AKIT_26	Akita	92.5	4.52721	female
AKIT_27	Akita	92.5	4.52721	male
AKIT_28	Akita	92.5	4.52721	female
GPYR_13	Great Pyrenees	92.5	4.52721	female
GPYR_14	Great Pyrenees	92.5	4.52721	female
LEON_12	Leonberger	92.5	4.52721	female
LEON_14	Leonberger	92.5	4.52721	female
LEON_15	Leonberger	92.5	4.52721	female
LEON_17	Leonberger	92.5	4.52721	female
LEON_18	Leonberger	92.5	4.52721	male
LEON_19	Leonberger	92.5	4.52721	male
KUVZ_12	Kuvasz	93.8	4.54116	female
KUVZ_14	Kuvasz	93.8	4.54116	male
KUVZ_15	Kuvasz	93.8	4.54116	female
KUVZ_16	Kuvasz	93.8	4.54116	male
KUVZ_17	Kuvasz	93.8	4.54116	female
ROTT_14	Rottweiler	100	4.60517	female
ROTT_15	Rottweiler	100	4.60517	female
ROTT_16	Rottweiler	100	4.60517	female
ROTT_17	Rottweiler	100	4.60517	male
ROTT_18	Rottweiler	100	4.60517	male
ANAT_07	Anatolian Shepherd Dog	115	4.74493	female
ANAT_09	Anatolian Shepherd Dog	115	4.74493	male
ANAT_10	Anatolian Shepherd Dog	115	4.74493	female
ANAT_11	Anatolian Shepherd Dog	115	4.74493	male
ANAT_12	Anatolian Shepherd Dog	115	4.74493	female
BRTR_06	Black Russian Terrier	115.5	4.74927	female
NEWF_16	Newfoundland	125	4.82831	female
NEWF_17	Newfoundland	125	4.82831	male
NEWF_18	Newfoundland	125	4.82831	female
NEWF_19	Newfoundland	125	4.82831	female
NEWF_20	Newfoundland	125	4.82831	male
NEWF_21	Newfoundland	125	4.82831	male
NEWF_22	Newfoundland	125	4.82831	male
NEWF_23	Newfoundland	125	4.82831	female
NEWF_24	Newfoundland	125	4.82831	female
NEWF_25	Newfoundland	125	4.82831	male
NEWF_26	Newfoundland	125	4.82831	female
NEWF_27	Newfoundland	125	4.82831	male
NEAP_08	Neapolitan Mastiff	130	4.86753	male
NEAP_09	Neapolitan Mastiff	130	4.86753	female
NEAP_10	Neapolitan Mastiff	130	4.86753	male
NEAP_11	Neapolitan Mastiff	130	4.86753	male
GSMD_05	Greater Swiss Mountain Dog	132.5	4.88658	male
GSMD_06	Greater Swiss Mountain Dog	132.5	4.88658	female
GSMD_07	Greater Swiss Mountain Dog	132.5	4.88658	male
DANE_09	Great Dane	136	4.91265	male
DANE_10	Great Dane	136	4.91265	male
DANE_11	Great Dane	136	4.91265	female
DANE_12	Great Dane	136	4.91265	female
DANE_13	Great Dane	136	4.91265	male
DANE_14	Great Dane	136	4.91265	female
DANE_15	Great Dane	136	4.91265	male
DANE_17	Great Dane	136	4.91265	female
DANE_20	Great Dane	136	4.91265	female
DANE_21	Great Dane	136	4.91265	male
DANE_22	Great Dane	136	4.91265	female
DANE_23	Great Dane	136	4.91265	male
DANE_24	Great Dane	136	4.91265	male
DANE_25	Great Dane	136	4.91265	female
IWOF_20	Irish Wolfhound	146.9	4.98975	female
IWOF_22	Irish Wolfhound	146.9	4.98975	female
IWOF_23	Irish Wolfhound	146.9	4.98975	male
IWOF_24	Irish Wolfhound	146.9	4.98975	male
IWOF_25	Irish Wolfhound	146.9	4.98975	male
IWOF_26	Irish Wolfhound	146.9	4.98975	female
IWOF_27	Irish Wolfhound	146.9	4.98975	male
IWOF_28	Irish Wolfhound	146.9	4.98975	male
IWOF_29	Irish Wolfhound	146.9	4.98975	female
STBD_14	Saint Bernard	155	5.04343	female
STBD_15	Saint Bernard	155	5.04343	female
STBD_16	Saint Bernard	155	5.04343	female
STBD_17	Saint Bernard	155	5.04343	female
STBD_18	Saint Bernard	155	5.04343	male
STBD_19	Saint Bernard	155	5.04343	male
STBD_20	Saint Bernard	155	5.04343	female
STBD_21	Saint Bernard	155	5.04343	female
STBD_22	Saint Bernard	155	5.04343	female
STBD_23	Saint Bernard	155	5.04343	male
STBD_24	Saint Bernard	155	5.04343	female
MAST_16	Mastiff	182.5	5.20675	male
MAST_17	Mastiff	182.5	5.20675	female
MAST_18	Mastiff	182.5	5.20675	female
MAST_21	Mastiff	182.5	5.20675	male
MAST_22	Mastiff	182.5	5.20675	female
MAST_23	Mastiff	182.5	5.20675	female
MAST_24	Mastiff	182.5	5.20675	male
MAST_25	Mastiff	182.5	5.20675	male
MAST_26	Mastiff	182.5	5.20675	female
MAST_27	Mastiff	182.5	5.20675	male
MAST_28	Mastiff	182.5	5.20675	male
MAST_29	Mastiff	182.5	5.20675	male
MAST_30	Mastiff	182.5	5.20675	male
[truncated: 101 more columns]

## Sheet: chr10_8Mb
Supplementary Table 3. Sanger fine-mapping genotypes.
chr10:8Mb
Sample ID	Breed name	Standard breed weight (lbs)	ln(Standard breed weight (lbs))	Sex	chr10_7961584	chr10_7990126	chr10_7990381	chr10_7990425	chr10_7996160	chr10_8015523	chr10_8021092	chr10_8032830	chr10_8033050	chr10_8066994	chr10_8070913	chr10_8070976	chr10_8081646	chr10_8081734	chr10_8081793	chr10_8081871	chr10_8081917	chr10_8081935	chr10_8100127	chr10_8100186	chr10_8100345	chr10_8106135	chr10_8129954	chr10_8132437	chr10_8137225	chr10_8139530	chr10_8150835	chr10_8151076	chr10_8151117	chr10_8158032	chr10_8176214	chr10_8183593	chr10_8183660	chr10_8183767	chr10_8205427	chr10_8208792	chr10_8239837	chr10_8239930	chr10_8250301	chr10_8258271	chr10_8258296	chr10_8263311	chr10_8267369	chr10_8270435	chr10_8290112
CHIH_01	Chihuahua	4	1.38629	male	AA	CC	CC	DD	AA	AA	GG	GG	TT	CC	GG	CC	GG	GG	GG	CC	AA	AA	GG	AA	AA	GG	AA	TT	CC	AA	TT	GG	AA	CC	CC	TT	GG	AG	GG		GG	TT	GG	TT	TT	GG	TT	CC	GG
YORK_10	Yorkshire Terrier	5.5	1.70475	female	AA		CC	DD		AA	GG	GG	TT		GG	CC	GG	GG	GG	CC	AA	AA	GG	AA	AA	GG	AA	TT	CC	AA				CC	CC	TT	GG	GG	GG	TT	GG	TT	GG	TT	TT	GG	TT	CC	GG
PAPI_09	Papillon	6.1	1.80829	female	AA	TT	TT	II	GG	GG	AA	GG	CC	TT	CC	TT	AA	GG	AA	TT	GG	GG	GG	GG	GG	GG	TT	CC	TT	GG	TT		AA	CC	TT	CC	CC	GG	CC	CC		TT	GG	AA	TT	TT	TT	GG	GG
BRUS_05	Brussels Griffon	9	2.19722	female	AA		CT	DI		AA	GG	AG	TT		CG	CC	GG	GG	GG	CC	AA	AA	AG	AG	AG	AG	AA	TT	CC	AA	TT		AA	CC	TT	CC	CC	GG	CG		GG	TT	GG	AT	TT	GT	AT	CC	GG
MPIN_09	Miniature Pinscher	9	2.19722	male	AA	CC	CC	DD	AA		GG	GG	TT	CC	GG	CC	GG	GG	GG	CC	AA	AA	GG	AA	AA	GG	AA	TT		AA					CC	TT	GG	GG	GG	TT		TT	GG	TT	TT	GG	TT	CC	GG
PEKE_13	Pekingese	9.5	2.25129	male	AA	CT	CT	DI	AG	AA	GG	AG	TT	CC	GG	CC	GG	GG	GG	CC	AA	AA	GG	AG	AG	GG	AA	TT	CC	AA	AT	AG	AG	CT	CT	CC	CC	GG	CG	CT	GG	TT	GG	AT	TT	GT	AT	CC	GG
CHIH_09	Chihuahua	4	1.38629	female
MALT_09	Maltese	5	1.60944	female
POM-_14	Pomeranian	5	1.60944	male
YORK_02	Yorkshire Terrier	5.5	1.70475	female																											TT																TT
PAPI_18	Papillon	6.1	1.80829	male
AFFN_05	Affenpinscher	7.5	2.0149	female
POM-_12	Pomeranian	5	1.60944	female																											TT																TT
TPOO_07	Poodle (Toy)	6.1	1.80829	female																											AT																AT
BRUS_04	Brussels Griffon	9	2.19722	female																											TT																TT
HAVA_01	Havanese	12.1	2.49321	female																											TT																AT
SHIH_07	Shih Tzu	12.5	2.52573	female																											TT																TT
BORZ_13	Borzoi	82.5	4.4128	female	AA	TT	TT	II	GG	GG	AA	GG	CC	TT	CC	TT	AA	GG	AA	TT	GG	GG	GG	GG	GG	GG	TT	CC	TT	GG	TT	GG	AA	CC	TT	CC	CC	GG	CC	CC	GG	TT	GG	AA	TT	TT	TT	GG	GG
ANAT_06	Anatolian Shepherd Dog	115	4.74493	female	AC	CT	CT	DI	AG	AA	GG	AA	TT	CC	GG	CC	GG	GG	GG	CC	AA	AA	AG	GG	GG	AG	AA	TT	CC	AA	AT	AG	AA	CT	TT	CC	CC	GG	CC	CC	GG	TT	AG	AA	TT	TT	AT	CG	GG
NEWF_13	Newfoundland	125	4.82831	male	AC	CT	CT	DI		AA	GG	AG	TT	CC	GG	CC	GG	GG	AG	CT	AG	AG	GG	GG	GG	GG	AT	CT	CT	AG	AT	AG	AA	CC	TT	CC	CC	GG	CC	CC	GG	TT	GG	AA	TT	GT	TT	CG	GG
DANE_16	Great Dane	136	4.91265	female	AA	TT	TT	II	GG		GG	AA	TT	CC	GG	CC	GG	GG	GG	CC	AA	AA	AA	GG	GG	AA	AA	TT	CC	AA	TT	GG	AA	CC	TT	CC	CC	GG	CC	CC	GG	TT	GG	AA	TT	TT	AA	CC	GG
IWOF_15	Irish Wolfhound	146.9	4.98975	unknown	AA	TT	TT	II	GG	GG	AA	GG	CC	TT	CC	TT	AA	GG	AA	TT	GG	GG	GG	GG	GG	GG	TT	CC		GG	TT	GG	AA	CC	TT	CC	CC	GG	GG	TT	GG	TT	GG	AA	AA	TT	TT	CC	AA
MAST_12	Mastiff	182.5	5.20675	female	AA	TT	TT	II	GG	AA	GG	AA	TT	CC	GG	CC	AA	AA	AA	TT	GG	GG	GG	GG	GG	GG	AA	TT	CC	AA	AA	GG	AA	TT	CC	TT	GG	GG	GG	TT	AA	GG	GG	AA	AA	TT	AA	CC	GG
LEON_16	Leonberger	92.5	4.52721	female
GPYR_15	Great Pyrenees	92.5	4.52721	male
AKBA_01	Akbash Dog	105.5	4.65871	male
DANE_18	Great Dane	136	4.91265	male																											TT																AT
IWOF_21	Irish Wolfhound	146.9	4.98975	female
MAST_19	Mastiff	182.5	5.20675	male
BORZ_04	Borzoi	82.5	4.4128	female																											TT																TT
AKIT_13	Akita	92.5	4.52721	male																											TT																TT
GPYR_09	Great Pyrenees	92.5	4.52721	female																											TT																AA
DANE_08	Great Dane	136	4.91265	female
IWOF_12	Irish Wolfhound	146.9	4.98975	female																											TT																TT
MAST_14	Mastiff	182.5	5.20675	male																											AT																AA
[truncated: 142 more columns]

## Sheet: chr4_39-41Mb
Supplementary Table 3. Sanger fine-mapping genotypes.
chr4:39-41Mb
Sample ID	Breed name	Standard breed weight (lbs)	ln(Standard breed weight (lbs))	Sex	chr4_39142131	chr4_39142139	chr4_39142327	chr4_39142451	chr4_39149643	chr4_39149795	chr4_39150019	chr4_39150106	chr4_39150197	chr4_39150476	chr4_39150501	chr4_39151457	chr4_39151692	chr4_39151922	chr4_39152028	chr4_39152062	chr4_39152066	chr4_39152278	chr4_39152951	chr4_39152982	chr4_39154292	chr4_39154626	chr4_39154633	chr4_39154637	chr4_39154675	chr4_39154676	chr4_39154692	chr4_39154923	chr4_39155348	chr4_39155712	chr4_39156070	chr4_39156172	chr4_39156278	chr4_39156287	chr4_39157333	chr4_39157359	chr4_39157369	chr4_39157419	chr4_39157554	chr4_39157587	chr4_39158055	chr4_39158071	chr4_39158384	chr4_39158438	chr4_39159229
CHIH_01	Chihuahua	4	1.38629	male	AA	CC	CC	TT	CC	CC	TT	TT	CC	CC	AA	TT	CC	DD	AA	TT	GG	GG	CC	GG	GG	AA	CC	AA	GG	AA			GG	CC	GG	CC	DD	GG	TT	TT	TT	CC	GG	CC	TT	CC	DD	DD	CC
YORK_10	Yorkshire Terrier	5.5	1.70475	female	AC	CT	CT	CT	AC	CC	TT	CT	CG	CC	AG	TT	CC	DI				GG			GG	AT							CG		GG			GG	TT	CT	TT	CT	GG	CC
PAPI_09	Papillon	6.1	1.80829	female	AA	CC	CC	TT	CC	CC	TT	TT	CC	CC	AA	TT	CC	DD	AA	TT	GG	GG			GG	AA							GG		GG			GG	TT	TT	TT	CC	GG	CC			DD	DD
BRUS_05	Brussels Griffon	9	2.19722	female	AA	CC	CC	TT	CC	CC	TT	TT	CC	CC	AA	TT	CC	DD	AA	TT	GG	GG			GG	AA							GG		GG			GG	TT	TT	TT	CC	GG	CC			DD	DD
MPIN_09	Miniature Pinscher	9	2.19722	male	AC		CC	CT	AC	CC	TT	CT	CG	CG	AG	TT	CC	DI	AG	CT	CG	GG											GG		GG			GG	TT	TT	TT	CC	GG	CC			DD	DD
PEKE_13	Pekingese	9.5	2.25129	male	AA	CC	CC	TT	CC	CC	TT	TT	CC	CC	AA	TT	CC	DD	AA	TT	GG	GG			GG	AA							GG		GG			GG	TT	TT	TT	CC	GG	CC			DD	DD
POM-_12	Pomeranian	5	1.60944	female					CC				CC			TT		DD	AA	TT	GG		CC	GG	GG	AA	CC	AA	GG	AA			GG	CC	GG	CC	DD	GG	TT	TT	TT	CC	GG	CC	TT	CC			CC
TPOO_07	Poodle (Toy)	6.1	1.80829	female					CC				CC			TT		DD	AG	CT			CC	GT	GG	AT	CT	AT	AG	AG				CG	GG	CT	DD	GG	TT	CT	TT	CT	GG	CC	AT	CT			CG
BRUS_04	Brussels Griffon	9	2.19722	female					CC				CC			TT		DD	AA	TT	GG		CC	GG	GG	AA	CC	AA	GG	AA			GG		GG	CC	DD	GG	TT	TT	TT	CC	GG	CC	TT	CC		DD	CC
HAVA_01	Havanese	12.1	2.49321	female					CC				CC			TT		DD	AA	TT	GG		CC	GG	GG	AA	CC	AA	GG	AA			GG		GG	CC	DD	GG	TT	TT	TT	CC	GG	CC	TT	CC		DD	CC
SHIH_07	Shih Tzu	12.5	2.52573	female					CC							TT		DD	AA	TT	GG		CC	GG	GG	AA	CC	AA	GG	AA			GG	CC	GG	CC	DD	GG	TT	TT	TT	CC	GG	CC	TT	CC		DD	CC
POM-_13	Pomeranian	5	1.60944	female																											AC	AG
PAPI_17	Papillon	6.1	1.80829	female																											CC	GG
TPOO_15	Poodle (Toy)	6.1	1.80829	female																											CC	GG
CHIN_06	Japanese Chin	7.5	2.0149	female
PEKE_14	Pekingese	9.5	2.25129	female																											CC	GG
BORZ_13	Borzoi	82.5	4.4128	female	AA	CC	CC	TT	AA	CC	TT	CC	GG	CC	GG	CC	CC	II	GG	CC	CC	GG				AA							CC		GG			AA	CC	CC	CC	CC	AA	CC			DD	II
ANAT_06	Anatolian Shepherd Dog	115	4.74493	female	AA	CC	CC	TT	AA	CC	TT	CC	GG	CC	GG	CC	CC	II	GG	CC	CC	GG			TT	AA							CC		AA			AA	CC	CC	CC	CC	AA	CC			DD	II
NEWF_13	Newfoundland	125	4.82831	male	AA	CC	CC	TT	AA	CC	TT	CC	GG	CC	GG	CC	CC	II	GG	CC	CC	GG			TT	AA							CC		AA			AA	CC	CC	CC	CC	AA	CC			DD	II
DANE_16	Great Dane	136	4.91265	female	AC	CT	CC	CT	AC	CT	CT	CT	CG	CG	GG	CT	CT	II	GG	CC	CC	CG											CC		GG			GG	TT	CC	TT	TT	GG	CT			II	II
IWOF_15	Irish Wolfhound	146.9	4.98975	unknown	AC	CT	CC	CT	AC	CC	TT	TT	CC	CC	AG	CT	CC	DI	AG	CT	CG	GG			GT	AA							CG		GG			AG	TT	CT	TT	CT	GG	CC
MAST_12	Mastiff	182.5	5.20675	female	AC	CT	CT	CT	AC	CC	TT	CT	CG	CC	AG	TT	CC	DI	AG	CT	CG	GG				AT							CC		GG				TT	CC	TT	TT	GG	CC			II	II
BORZ_04	Borzoi	82.5	4.4128	female												TT		II	GG	CC	CC		CG	TT	GT	AT	CT	AT	AG	AG			CC	CG	GG	CT	DI		CT	CC	CT	CT	AG	CC
GPYR_09	Great Pyrenees	92.5	4.52721	female					AA				GG			CC		II	GG	CC	CC		CC	TT	TT	AA	CC	AA	GG	AA			CC	CC	GG	CC	II	AA	CC	CC	CC	CC	AA	CC	TT	CC		II	CC
AKIT_13	Akita	92.5	4.52721	male					AA				GG			TT		II	GG	CC	CC		CG	TT	GG	TT	TT	TT	AA				CG	GG	GG	CT	DD	GG	TT	CT	TT	CT	GG	CC	AT	CC		DI	CG
DANE_08	Great Dane	136	4.91265	female									CC			CC		II	GG	CC	CC		CC	TT	GG	TT	TT	TT	AA	GG			CC		GG	TT	DD		TT	CC	TT	TT	GG	TT	AA	CC		II	CC
IWOF_12	Irish Wolfhound	146.9	4.98975	female					AC				CC			CT		DI	AG	CT	CG		CC	GT	GT	AA	CC	AA	GG	AA			CG		GG	CC	DI		TT	CT	TT	CT	GG	CC	AT	CC
MAST_14	Mastiff	182.5	5.20675	male					CC							TT		DI	AG	CT	CG		CC	GT	GG	AT	CT	AT	AG	AG			GG	CG	GG	CT	DD	GG	TT	CT	TT	CT	GG	CT	AT	CC			CC
BORZ_17	Borzoi	82.5	4.4128	female																											AC	AG
AKIT_24	Akita	92.5	4.52721	female																											CC	GG
KUVZ_13	Kuvasz	93.8	4.54116	female
DANE_19	Great Dane	136	4.91265	female
IWOF_19	Irish Wolfhound	146.9	4.98975	female																											CC	GG
MAST_20	Mastiff	182.5	5.20675	female																											AC	AG
[truncated: 171 more columns]

## Sheet: chr7_43Mb
Supplementary Table 3. Sanger fine-mapping genotypes.
chr7:43Mb
Sample ID	Breed name	Standard breed weight (lbs)	ln(Standard breed weight (lbs))	Sex	chr7_43633660	chr7_43641314	chr7_43658675	chr7_43667858	chr7_43668135	chr7_43674149	chr7_43677629	chr7_43680415	chr7_43680679	chr7_43680845	chr7_43680975	chr7_43681264	chr7_43681271	chr7_43681795	chr7_43681914	chr7_43681915	chr7_43682223	chr7_43682882	chr7_43682885	chr7_43684500	chr7_43684565	chr7_43684567	chr7_43684745	chr7_43685825	chr7_43686150	chr7_43686714	chr7_43687204	chr7_43687709	chr7_43687740	chr7_43687941	chr7_43688142	chr7_43688388	chr7_43688750	chr7_43689514	chr7_43689551	chr7_43689737	chr7_43690581	chr7_43690817	chr7_43690917	chr7_43691098	chr7_43691462	chr7_43691495	chr7_43691496	chr7_43691688	chr7_43691953
CHIH_05	Chihuahua	4	1.38629	male								AG	AG	AG	CT	CG	AA	AG	CT	AG	CC	II	TT	CT	DI		DI	CT	CT	CT	CT	AT	CT	CT	DI	CT		TT	AC	CT	TT	TT	CC	DI	AG	CT	CC	AT	CT
TYFX_08	Toy Fox Terrier	5.3	1.66771	female								GG	GG	GG	CC	GG	AA	GG	TT	GG	AA	II		CC	DD	AA	DD	TT	TT	TT	CC	AA	TT	CC	DD	TT	TT	TT	AA	CC	TT	TT	CC	DD	AA	TT	TT	AA	CC
TPOO_07	Poodle (Toy)	6.1	1.80829	female	GG	AA	CC	AG			TT	GG	GG	GG	CC	GG	AA	GG	TT	GG	AC	II	TT	CC	DD	AA	DD	TT	TT	TT	CC	AA	TT	CC	DD	TT	CT	TT	AA	CC	TT	TT	CC	DD	AA	TT	TT	AA	CC
CHIN_01	Japanese Chin	7.5	2.0149	male								GG	GG	GG	CC	GG	AA	GG	TT	GG	CC	II	TT	CC	DD	AA	DD	TT	TT	TT	CC	AA	TT	CC	DD	TT	TT	TT	AA	CC	TT	TT	CC	DD	AA	TT	TT	AA	CC
BRUS_05	Brussels Griffon	9	2.19722	female	GG	AA	CC	AA	GG	CC	TT	GG	GG	GG	CC	GG	AA	GG	TT	GG	CC	II	TT	CC	DD	AA	DD	TT	TT	TT	CC	AA	TT	CC	DD	TT	TT	TT	AA	CC	TT	TT	CC	DD	AA	TT	TT	AA	CC
HAVA_01	Havanese	12.1	2.49321	female	GG	AA	CC	AG			TT	GG	GG	GG	CC	GG	AA	GG	TT	GG	CC	II	TT	CC	DD	AA	DD	TT	TT	TT	CC	AA	TT	CC	DD	TT	CT	TT	AA	CC	TT	TT	CC	DD	AA	TT	TT	AA	CC
CHIH_01	Chihuahua	4	1.38629	male	GG	AA	CC	AA	GG	CC	TT	GG	GG			GG														TT											TT
POM-_12	Pomeranian	5	1.60944	female	GG	AA	CC	AA			TT	GG
YORK_10	Yorkshire Terrier	5.5	1.70475	female	GG	AA	CC	AA	GG	CC	TT	GG	GG			GG																									TT
PAPI_09	Papillon	6.1	1.80829	female	GG	AA	CC	AA	GG	CC	TT	GG	GG			GG														TT											TT
BRUS_04	Brussels Griffon	9	2.19722	female	GG	AA	CC	AA			TT	GG
MPIN_09	Miniature Pinscher	9	2.19722	male	GG	AA	CC	AA		CC	TT	GG	GG			GG														TT											TT
PEKE_13	Pekingese	9.5	2.25129	male	GG	AA	CC	AA	GG	CC	TT	GG	GG			GG														TT											TT
SHIH_07	Shih Tzu	12.5	2.52573	female	GG	AA	CT	AG			TT	GG
BORZ_09	Borzoi	82.5	4.4128	female								AG	AG	AG	CT	CG	AC	AG	CT	AG	CC	DI		CT	DI		DI	CT	CT	CT	CT	AT	CT	CT	DI	CT	TT	TT	AC	CT	TT	TT	CC	DI	AG			AT	CT
AKIT_12	Akita	92.5	4.52721	female								GG	GG	GG	CC	GG	AA	GG	TT	GG	CC	II	TT	CC	DD	AA	DD	TT	TT	TT	CC	AA	TT		DD	TT	TT	CT	AA	CC	TT	TT	CC	DI	AG	CT	CC	AT	CT
ROTT_13	Rottweiler	100	4.60517	male								AG	AG	AG	CT	CG	AA	AG	CT	AG	CC	II	TT	CT	DI		DI	CT	CT	CT	CT	AT	CT	CT	DI	CT	TT	TT	AC	CT	TT	TT	CC	DI	AG	TT	CT	AT	CT
ANAT_06	Anatolian Shepherd Dog	115	4.74493	female	GG	AA	CC	AG	AG	CG	CT	AG	AG	AG	CT	CG	AA	AG	CT	AG	CC	II	TT	CT	DI		DI	TT	TT	TT	CC	AA	TT	CC	DD	TT	TT	TT	AA	CC	TT	TT	CC	DD	AA	TT	TT	AA	CC
BULM_01	Bullmastiff	115	4.74493	male								GG	GG	GG	CC	GG	AA	GG	TT	GG	CC	II	TT		DD		DD	TT	TT	TT	CC	AA	TT	CC	DD	TT	TT	TT	AA	CC	TT	TT	CG	DD	AA	TT	TT	AA	CC
DANE_14	Great Dane	136	4.91265	female								GG	GG	GG	CC	GG	AA	GG	TT	GG	CC	II	TT	CC	DD	AA	DD	TT	TT	TT	CC	AA	TT	CC	DD	TT	TT	TT	AA	CT	TT	TT	CG	DD	AA	TT	TT	AA	CC
IWOF_11	Irish Wolfhound	146.9	4.98975	male								GG	GG	GG	CC	GG	AC	GG	TT	GG	CC	II	CT	CC	DD	AA	DD	TT	TT	TT	CC	AA	TT	CC	DD	TT	TT	TT	AA	CC	TT	TT	CC	DD	AA	TT	TT	AA	CC
STBD_01	Saint Bernard	155	5.04343	female								AA	AA	AA	TT	CC	AA	GG	CC	AA	CC	II	TT	TT	II	TT	II	CC	CC	CC	TT	TT	CC	TT	II	CC	TT	TT	CC	TT	CC	CC	CC	II	GG	TT	CC	TT	TT
MAST_15	Mastiff	182.5	5.20675	female								GG	GG	GG	CC	GG	AC	GG	TT	GG		II	TT		DD		DD	TT	TT		CC	AA	TT	CC	DD	TT		TT	AA	CC	TT	TT	CC	DD	AA	TT	TT	AA	CC
KUVZ_03	Kuvasz	93.8	4.54116	male								GG	GG	GG	CC	GG	AC	GG	TT	GG	CC	DI		CC	DD	AA	DD	TT	TT		CC	AA	TT	CC	DD	TT	TT	TT	AA	CC	TT	TT	CG	DD	AA	TT	TT	AA	CC
BORZ_13	Borzoi	82.5	4.4128	female	GG	AA	CT	GG			TT	GG	GG			GG																									TT
BORZ_04	Borzoi	82.5	4.4128	female	GG	AA	TT	GG			TT	GG
GPYR_09	Great Pyrenees	92.5	4.52721	female	GG	AA	CC	GG			TT	GG
AKIT_13	Akita	92.5	4.52721	male	AG	AG	CT	AG			TT	GG
NEWF_13	Newfoundland	125	4.82831	male	AA	GG	TT	GG	AA	CC	TT	GG	GG			GG														TT											TT
DANE_16	Great Dane	136	4.91265	female	GG	AA	CT	GG		CG	CT	AG	AG			CG														CT											CT
DANE_08	Great Dane	136	4.91265	female	AG	AG	CT	GG			TT	GG
IWOF_12	Irish Wolfhound	146.9	4.98975	female	GG	AA	CC	AA			TT	GG
IWOF_15	Irish Wolfhound	146.9	4.98975	unknown	GG	AA	CC	AA	GG	CC	TT	GG	GG			GG														TT											TT
MAST_12	Mastiff	182.5	5.20675	female	GG	AA	CC	AA	GG	CC	TT	GG	GG																	TT											TT
MAST_14	Mastiff	182.5	5.20675	male	GG	AA	CC	AA			TT	GG
[truncated: 564 more columns]
