# Supplementary material for: Derived variants at six genes explain nearly half of size reduction in dog breeds
Source: HighWire-hosted journal article supplement (doi:10.1101/gr.157339.113), 2013-09-11
Supplement: Supplemental_TableS4.xlsx [file Supplemental_TableS4.xlsx]

## Sheet: SNPlex1
Supplemental Table S4. SNPlex genotypes and p-values.
SNPlex 1
Sample ID	Breed name	Standard breed weight (lbs)	ln(Standard breed weight)	Sex	chr4_39080438	chr4_39105750	chr4_39149081	chr4_39156070	chr4_39164250	chr4_39194206	chr4_39206521	chr4_39234657	chr4_39238717	chr4_39249807	chr4_39266795	chr4_39273068	chr4_39283256	chr4_39306717	chr4_40513514	chr4_40534197	chr4_40543545	chr4_40549207	chr4_40606685	chr4_40609208	chr4_40641137	chr4_40646179	chr4_40668587	chr4_40681891	chr4_40689045	chr4_40696797	chr4_40726011	chr4_40754105	chr4_40764649	chr4_40775511	chr4_40783984	chr4_40799627	chr4_40810798	chr4_40815571	chr4_40865636	chr4_40892519	chr4_40913417	chr4_40978622	chr4_41001465	chr4_41073366	chr4_41095246	chr4_41144746	chr4_41186663	chr4_41254760	chr7_43641314
CHIH_08	Chihuahua	4	1.38629	female	AA	TT	GG	GG	AA	GG	AA	AA	AA	TT	GG	TT	TT	AA	GG	GG	CC	TT	GG	AA	CC	TT	CC	GG	CC	CC	AG	CT	CT	GG	TT	GG	AA	AG	CC	TT	GG	CC	AA	TT	GG	GG	TT	AA	AA
POM-_05	Pomeranian	5	1.60944	male	AA	TT	GG	GG	AA		AG	AA	AG		GG		TT	AG	AG		CT	CT	GG	AT	CG	CT	CT	AG	CT	CT	AA	CT		AG		GG	AA	GG		TT	GG			TT	GG	GG			AA
POM-_06	Pomeranian	5	1.60944	male	AG	TT	GG	GG	AA		AA	AA	AA		GG		TT	AA	AA		TT	CC	GG	TT	CG	CT	CT	AG	CT	CT	AA	CC		GG		AG	AG	AG		TT	GG			AT	GG	AG			AA
POM-_07	Pomeranian	5	1.60944	male	AA	TT	GG	GG	AA		AA	AA	AA		GG		TT	AG	GG		CC	CC	GG	AA	CC	CC	CC	GG	CC	CC	GG	CC	CT	GG	TT	GG	AA	AA	CC	AT	GG		AA	TT	GG	GG	TT		AA
POM-_08	Pomeranian	5	1.60944	male	AA		GG	GG	AA		AG	AG	AG		GG		TT	AG	AG		CT	CT	GG	AT	CG	CT	CC	AG	CC	CC	AG		TT		CC	GG	AA	GG	CC	AA	GG		AA	TT	GG	GG	TT		AA
POM-_09	Pomeranian	5	1.60944	male	AA	TT	GG	GG	AC		AG	AG	AG		GG		TT	AG	GG		CC	CT	GG	AA	CC	CC	CC	GG	CC	CC	GG	CC		GG		GG	AA	AG		AA	GG			TT	GG	GG			AA
POM-_10	Pomeranian	5	1.60944	male	AA	TT	GG	GG	AA		AA	AA	AA		GG		TT	AA	AG		CT	CT	GG	AT	CG	CT	CT	AG	CT	CT	AA	CT		AG		GG	AA	GG		AT	GG			TT	GG	GG			AA
POM-_11	Pomeranian	5	1.60944	male	AA	TT	GG	GG	AA	GG	AA	AA	AA	TT	GG	TT	TT	AA	AA	AA	TT	CC	GG	TT	GG	CC	TT	AA	TT	TT	AA	CC	CC	GG	CC	AG	AG	AG	CC	TT	GG	CC	AA	AT	GG	AG	CT	AA	AA
POM-_12	Pomeranian	5	1.60944	female	AA	TT	GG	GG	AA	GG	AA	AA	AA	TT	GG	TT	TT	AA	GG	GG	CC	CT	GG	AA	CC	TT	CC	AG	CC	CT	AG	CC	CC	GG	TT	GG	AA	AG	CC	TT	GG	CC	AA	TT	GG	GG	TT	GG	AA
TYFX_05	Toy Fox Terrier	5.3	1.66771	male	AA	AT	GG	GG	AA		AA	AA	AA		GG		TT	AA	AA		CT	CC		TT	GG	CC	CC	GG	CC		AA	CC		AA		GG	AA	GG		TT	GG			TT	GG	AA			AA
TYFX_06	Toy Fox Terrier	5.3	1.66771	female	AA	TT	GG	GG	AA	GG	AA	AA	AA	TT	GG	TT	TT	AG	GG	GG	CC	CT	GG	AA	CC	CC	CC	GG	CC	CC	AA	CC	CC	GG	CC	GG	AA	GG	CC	TT	GG	CT	AC	AT	GG	AG	CT	AA	AA
TYFX_07	Toy Fox Terrier	5.3	1.66771	female	AG	AT	AG	GG	AC		AG	AA	AA		GG		TT	AA	GG			TT		AT	CC	TT		AG	CC	CC	AG	CT	CT	AG	CT	AG	AG	AG		AT	GG		AA	AA	GG	AG	CC		AA
TYFX_08	Toy Fox Terrier	5.3	1.66771	female	AA	TT	GG	GG	AA	GG	AG	AG	AG	AT	GG	TT	TT	AG	GG	GG	CC	TT	GG	AA	CC	TT	CC	GG	CC	CC	AA	TT	TT	AA	CC	AA	GG	AA	CC	TT	GG	CC	AA	AA	GG	AA	CC	AG	AA
YORK_05	Yorkshire Terrier	5.5	1.70475	female	AA	TT	GG	GG	AA	GG	AA	AA	GG	AA	GG	TT	TT	GG	GG	GG	CC	CC	GG	AA	CC	TT	CC	GG	CC	CC	AG	CC		GG		GG	AA	AG		TT	GG	CC		TT	GG	GG		AA	AA
YORK_06	Yorkshire Terrier	5.5	1.70475	female	AA	TT	GG	GG	AA	GG	AA	AA	AG	AT	GG	TT	TT	GG	GG	GG	CC	CT	GG	AA	CC	CT	CC	GG	CC	CC	GG	CC	CT	GG	CT	GG	AA	GG	CC	TT	GG	CC	AA	TT	GG	GG	CT	AG	AA
YORK_07	Yorkshire Terrier	5.5	1.70475	male	AG	AT	GG	GG	AA	CG	AG	AG	GG	AT	AG	CT	GT	GG	GG	AG	CT	CC	GT	AA	CC	CT	CC	AG	CC	CT	AA	CC	CC	AG	CT	GG	AA	GG	CC	AT	GG	CC	AA	TT	GG	GG	CT	AG	AA
YORK_08	Yorkshire Terrier	5.5	1.70475	male	AA	TT	GG	GG	AA	GG	AA	AA	AG	AT	GG	TT	TT	GG	GG	GG	CC	CC	GG	AA	CC	TT	CC	GG	CC	CC	AG	CC	CC	GG	TT	GG	AA	AG	CC	TT	GG	CC	AA	TT	GG	GG	TT	AA	AA
YORK_09	Yorkshire Terrier	5.5	1.70475	male	AA	TT	GG	GG	AA	GG	AA	AA	AG	AT	GG	TT	TT	GG	GG	GG	CC	CT	GG	AA	CC	CT	CC	GG	CC	CC	AG	CC	CC	GG	TT	GG	AA	AG	CC	TT	GG	CC	AA	TT	GG	GG	TT	AG	AA
YORK_10	Yorkshire Terrier	5.5	1.70475	female	AG	AT	GG	GG	AA		AG	AG	AG		AG		GT	AG	AG		CT	CC	GT	AA	CC	CT	CC	AG	CC	CT	AA	CC		GG		GG	AA	AG		AT	GG			TT	GG	GG			AA
TPOO_07	Poodle (Toy)	6.1	1.80829	female	AA	TT	GG	GG	AA		AA	AG	AA		GG		TT	AA	AA		TT	CC	GG	TT	GG	CC	TT	AA	TT	CT	AG	CC	CC	GG	CT	GG	AA	GG	CC	TT	GG		AA	TT	GG	GG	TT		AA
TPOO_08	Poodle (Toy)	6.1	1.80829	female	AA		GG				AG	AG	AG				GT	AG	AG		CT	CC	GG		CG	CC	CT		CT	CC	AG	CT	CT	AG	CT	AG		AG	CC	TT	GG		AA	AT	GG		CT		AA
PAPI_05	Papillon	6.1	1.80829	female	AA	TT	GG	GG	AA	GG	AA	AA	AA	TT	GG	TT	TT	AA	AG	AG	CT	CT	GG	AT	CG	CT	CT	AG	CT	CT	AA	CT	CT	AG	CC	AG	AG	GG	CC	TT	GG	CC	AA	TT	GG	GG	TT	AG	AA
PAPI_06	Papillon	6.1	1.80829	female	AA	TT	GG	GG	AA		AA	AA	AA		GG		TT	AA	AG		CT	CT	GG	AT	CG	CT	CT	AG	CT	CT	AA	TT	TT	AA	CC	AA	GG	AA	CC	TT	GG		AA	AA	GG	AA	CC		AA
PAPI_07	Papillon	6.1	1.80829	male	AA	TT	GG	GG	AA	GG	AA		AA	TT	GG	TT	TT	AA	AG	AG	CT	CT	GG	AT	CG		CT	AG	CT	CT	AA	CT	CT	AG	CC	AG	GG	AA	CC	TT	GG	CC	AA	AA	GG	AA	CC	AA	AA
PAPI_08	Papillon	6.1	1.80829	male	AA	TT	GG	GG	AA		AA	AA	AA		GG		TT	AA	GG		CC	TT	GG	AA	CC	TT	CC	GG	CC	CC	AA	TT	TT	AA	CC	AA	GG	AA	CC	TT	GG		AA	AT	GG	AG	CT		AA
PAPI_09	Papillon	6.1	1.80829	female	AA	TT	GG	GG	AA	GG	AA	AA	AA	TT	GG	TT	TT	AA	GG	GG	CC	CT	GG	AA	CC	CT	CC	GG	CC	CC	AA	CT	CT	AG	CT	AG	AG	AA	CC	TT	GG	CC	AA	AA	GG		CC	AA	AA
PAPI_10	Papillon	6.1	1.80829	female	AA	TT	GG	GG	AA	GG	AA	AA	AA	TT	GG	TT	TT	AA	GG	GG	CC	CT	GG	AA	CC	CT	CC	GG	CC	CC	AA	CT		AG		AG	AG	AA		TT	GG	CC		AA	GG	AA		AA	AA
PAPI_11	Papillon	6.1	1.80829	female	AA	TT	GG	GG	AA	GG	AA	AA	AA	TT	GG	TT	TT	AA	GG	GG	CC	TT	GG	AA	CC	CC	TT	AA	CC	CC	GG	CC	CC	GG	TT	GG	AA	GG	CC	AA	GG	CC	AA	TT	GG	GG	TT	AA	AA
PAPI_12	Papillon	6.1	1.80829	male	AA	TT	GG	GG	AA	GG	AA	AA	AA	TT	GG	TT	TT	AA	AG	AG	CT	CT	GG	AT	CG	CT	CT	AG	CT	CT	AA	TT	TT	AA	CC	AA	GG	GG	CC	TT	GG	CC	AA	AA	GG	AA	CC	AA	AA
PAPI_13	Papillon	6.1	1.80829	male	AA	TT	GG	GG	AA	GG	AA	AA	AG	AT	GG	TT	TT	AG	GG	GG	CC	TT	GG	AA	CC	TT	CC	GG	CC	CC	AA	TT	TT	AA	CC	AG	AG	GG	CC	TT	GG	CC	AA	AT	GG	AG	CT	AA	AA
CHIN_05	Japanese Chin	7.5	2.0149	male	AG	AT	AG	GG	AC	GG	AG	AG	AG	AT	GG	CT			AG	AG	CT	CC	GG	AT	CG	CT	CT	AG	CT	CT	AA		CC		CT	AG	AG		CC	AT	GG	CC	AA	AT	GG	AG	CT	AA	AA
BRUS_05	Brussels Griffon	9	2.19722	female	AA	TT	GG	GG	AA	GG	AG	AA	AG	AT	GG	TT	TT	AG	AG	AG	CT		GG	AT	CG	CT	CT	AG	CT	CT	AG	CC	CC	GG	CT	AG	AG	AG	CC	TT	GG	CC	AA	AT	GG	AG	CC	AA	AA
BRUS_06	Brussels Griffon	9	2.19722	female		TT		GG	AA	GG		AA	AA	TT	GG	TT	TT	AA	AG	AG	CT	CC	GG	AT	CG	CT	CT	AG	CT	CT	AG	CC	CC	AG	CT	AG	AG		CC	TT	GG	CC	AA		GG	AG	CT	AA	AG
MPIN_06	Miniature Pinscher	9	2.19722	male	AG	AT	AG	GG	AA	GG	AA	AA	AA	TT	GG	TT	TT	AA	AA	AA	TT	CC	GT	AT	CG	CT	CT	AA	CT	TT	AA	CC	CC	GG	CT	AG	AG	GG	CC	AT	GG	CC	AA	AT	GG	AG	CT	AA	AA
MPIN_07	Miniature Pinscher	9	2.19722	female		TT		GG	AA			AA	AA		GG		TT	AA	AA		TT	CC	GG	TT	GG	CC	TT	AA	TT	TT	AA	CC	CC	GG	CC	AA	GG		CC	TT	GG		AA		GG	AA	CC		AA
MPIN_08	Miniature Pinscher	9	2.19722	male	AG	AT	AG	GG	AA	GG	AA	AA	AA	TT	GG	TT		AA	AG	AG	CT	CT	GT	AA		TT	CC	AG	CC	CT		CT	CT	AG	CT	GG	AA	GG	CC	AA	GG	CC	AA	TT		GG	TT	AA	AA
MPIN_09	Miniature Pinscher	9	2.19722	male	AG	AT	AG	GG	AA	GG	AA	AA	AA	TT	GG	TT		AA	AG	AG	CT	CT	GT	AA		TT	CC	AG	CC	CT		CC		GG		GG	AA	GG		AA	GG	CC		TT		GG		AA	AA
MPIN_10	Miniature Pinscher	9	2.19722	female	AA	AT	GG	GG	AA	GG	AA	AG	AG	AT	GG	TT	TT	AG	AG	AG	CT	CC	GG	AT	CG	CC	CT	AG	CT	CT	AA	CC	CC	AG	CC	AG	AG	AG	CC	TT		CC	AA	AT	GG	AG	CT	AA	AA
MPIN_11	Miniature Pinscher	9	2.19722	female	AA	TT	GG	GG	AA	GG	AA	AA	AA	TT	GG	TT	TT	AA	AA	AA	TT	CC	GG	TT	GG	CC	TT	AA	TT	TT	AA	CC	CC	GG	CC	AA	GG		CC	TT	GG	CC	AA	AA	GG	AA	CC	AA	AA
PEKE_05	Pekingese	9.5	2.25129	female		AT	GG	GG	AC	GG		AA	AA	TT	AG	CT	GT	AG	AA	GG	CC	TT	GG	AA	CC	CC	CC	GG	CC	CC	GG	CC	TT	GG	TT	GG	AA		CC	AA	GG	CC	AA	TT	GG	GG	CC	GG	AA
PEKE_06	Pekingese	9.5	2.25129	male	AA	TT	GG	GG	AA	GG	AA	AA	AA	TT	GG	TT	TT	AA	AA	GG	CC	TT	GG	AA	CC	CC	CC	GG	CC	CC	GG	CC	TT	GG	TT	GG	AA	GG	CC	AA	GG	CC	AA	TT	GG	GG	CC	GG	AA
PEKE_07	Pekingese	9.5	2.25129	male	AA	TT	GG	GG	AA	GG	AA	AA	AA	TT	GG	TT	TT	AA	AA	AG	CT	CT	GG	AT	CG	CC	CT	AG	CT	CT	AG	CC	CT	GG	CT	GG	AA	GG	CC	AT	GG	CC	AA	TT	GG	GG	CT	AG	AA
PEKE_08	Pekingese	9.5	2.25129	female	AA	AT	GG	GG	AC	GG	AG	AA	AA	TT	AG	CT	GT	AG	AA	GG	CC	TT	GG	AA	CC	CC	CC	GG	CC	CC	GG	CC	TT	GG	TT	GG	AA	GG	CC	AA	GG	CC	AA	TT	GG	GG	CC	GG	AA
PEKE_09	Pekingese	9.5	2.25129	female	AA	TT	GG	GG	AA	GG	AA	AA	AA	TT	GG	TT	TT	AA	AA	AG	CT	CT	GG	AT	CG	CC	CT	AG	CT	CT	AG	CC	CT	GG	CT	GG	AA	GG	CC	AT	GG	CC	AA	TT	GG	GG	CT	AG	AA
PEKE_10	Pekingese	9.5	2.25129	male	AA	TT	GG	GG	AA	GG	AA	AA	AA	TT	GG	TT	TT	AA	AA	GG	CC	TT	GG	AA	CC	CC	CC	GG	CC	CC	GG	CC	TT	GG	TT	GG	AA	GG	CC	AA	GG	CC	AA	TT	GG	GG	CC	GG	AA
PEKE_11	Pekingese	9.5	2.25129	female	AA	TT	GG	GG	AA	GG	AA	AA	AA	TT	GG	TT	TT	AA	AA	AG	CT	CT	GG	AT	CG	CC	CT	AG	CT	CT	AG	CC	CT	GG	CT	GG	AA	GG	CC	AT	GG	CC	AA	TT	GG	GG	CT	AG	AA
PEKE_12	Pekingese	9.5	2.25129	male	AA	TT	GG	GG	AA	GG	AA	AA	AA	TT	GG	TT	TT	AA	AA	GG	CC	TT	GG	AA	CC	CC	CC	GG	CC	CC	GG	CC		GG		GG	AA	GG		AA	GG	CC		TT	GG	GG		GG	AA
PEKE_13	Pekingese	9.5	2.25129	male	AA	TT	GG	GG	AA	GG	AA	AA	AA	TT	GG	TT	TT	AA	AA	GG	CC	TT	GG	AA	CC	CC	CC	GG	CC	CC	GG	CC	TT	GG	TT	GG	AA	GG	CC	AA	GG	CC	AA	TT	GG	GG	CC	GG	AA
SILK_07	Silky Terrier	10	2.30259	male	AA	AT	AG			GG	AA	AA	AA	TT	AG	CT	GT	AG	AG	AG		CT	GG		CG	CT	CT		CT	CT	AA	CT	CT	AG	CC	AG		AG	CC	TT		CC	AA	AT	GG		CT	AG	AA
SILK_08	Silky Terrier	10	2.30259	male	AA	TT	GG	GG	AA	GG	AA	AA	AA	TT	AG	CT	GT	AG	AG	AG	CT	CT	GG	AT	CG	CT	CT	AG	CT	CT	AA	CT	CT	AG	CC	AG	AG	AG	CC	TT	GG	CC	AA	AT	GG	AG	CT	AG	AA
ITGY_06	Italian Greyhound	11.3	2.4248	female	AG	AT	GG	GG	AC	CG	AG	AA	AG	AT	AG	CT	GT	GG	GG	GG	CC	TT	GG	AA	CC	CC	CC	AA	CC	TT	AA	CC	CC	GG	TT	GG	AA	GG	CC	TT	GG	CC	AA	TT	GG	GG	TT	GG	AA
ITGY_07	Italian Greyhound	11.3	2.4248	female	GG	AA	GG	GG	CC	CC	GG	AA	AA	TT	AA	CC	GG	GG	AA	AA	TT	CC	GG	TT	GG	CC	TT	AA	TT	TT	AA	CC	CC	GG	CC	AA	GG	AG	CC	TT	GG	CC	AA	AA	GG	AA	CC	AA	AA
HAVA_07	Havanese	12.1	2.49321	female	AA	TT	GG	GG	AA	GG	AA	AA	AA	AA	GG	TT	TT	GG	GG	GG	CC	CC	GG	AA	CC	TT	CC	GG	CC	CC	AG	CC	CC	GG	TT	GG	AA	GG	CC	AA	GG	CC	AA	TT	GG	GG	TT	GG	AA
HAVA_08	Havanese	12.1	2.49321	male	AA	AT	AG	GG	AC	CG	AG	AA	AG	AT	GG	CT	TT	AA	AG	AG	CT	CT	TT	AA	CC	TT	CC	AG	CC	CT	AA	CC	CC	GG	CT	GG	AA	GG	CC	AT	GG	CC	AA	TT	GG	GG	CT	AG	AA
HAVA_09	Havanese	12.1	2.49321	female	AA	TT	GG	GG	AA	GG	AG	AG	AG	AA	GG	TT	TT	GG	GG	GG	CC	CC	GG	AA	CC	TT	CC	GG	CC	CC	AG	CC	CC	GG	CT	GG	AA	GG	CC	AT	GG	CC	AA	TT	CG	GG	TT	GG	AA
HAVA_10	Havanese	12.1	2.49321	female	AA	TT	GG	GG	AA	GG	AA	AA	AA	AA	GG	TT	TT	GG	GG	GG	CC	CC	GG	AA	CC	TT	CC	GG	CC	CC	AA	CC	CC	GG	TT	GG	AA	GG	CC	AA	GG	CC	AA	TT	GG	GG	TT	GG	AA
HAVA_11	Havanese	12.1	2.49321	male	AA	TT	GG	GG	AA		AG	AG	AG		GG		TT	GG	GG		CC	CC	GG	AA	CC	TT	CC	GG	CC	CC	AG	CC		GG		GG	AA	GG		AT	GG			TT	CG	GG			AA
HAVA_12	Havanese	12.1	2.49321	male	AA	AT	AG	AG	AC	GG	AA	AA	AA	AT	AG	CT	GT	GG	GG	GG	CC	CC	GG	AA	CC	CT	CT	GG	CC	CC	AA	CC		GG		GG	AA	GG		AT	GG	CC		TT	GG	GG		AG	AA
HAVA_13	Havanese	12.1	2.49321	male	AA	TT	GG	GG	AC	GG	AA	AA	AA	AT	GG	TT	TT	AG	AG	AG	CT	CC	GG	AT	CG	CC	TT	AG	CT	CT	AA	CC	CC	GG	CT	AG	AG	AG	CC	TT	GG	CC	AA	AT	GG	AG	CT	AA	AG
SHIH_05	Shih Tzu	12.5	2.52573	male	AA		GG					AA	AA				TT	AA	AA		CT	CT	GT		CG	CC	CT			CT	AG	CT	TT	AG	CT			AG	CC	AT	GG		AA	AT	GG		CC		AA
SHIH_06	Shih Tzu	12.5	2.52573	male	AA	TT	GG	GG	AA		AA	AA	AA		GG		TT	AA	AA		CC	TT	GG	AA	CC	CC	CC	GG	CC	CC	GG	CC	TT	GG	TT	GG	AA	GG	CC	AA	GG		AA	TT	GG	GG	CC		AA
SHIH_07	Shih Tzu	12.5	2.52573	female	AA	TT	GG	GG	AA		AA	AA	AA		GG		TT	AA	AA		CT	CT	GG	AT	CG	CC	CT	AG	CT	CT	AG	CC	CT	GG	CT	AG	AG	AG	CC	AT	GG		AA	TT	GG	GG	CT		AA
SHIH_08	Shih Tzu	12.5	2.52573	female	AA	TT	GG				AA	AA	AA		GG		TT	AA	AA		CT	CT	GG		CG	CC	CT		CT	CT	AG	CC		GG		AG		AG		AT	GG			AT	GG				AA
DACH_01	Dachshund	18.9	2.93916	male	AA	TT	AG	GG	AA	CG	AG	AG	AG	TT	GG	CT	TT	GG	GG	GG	CC	TT	GG	AA	CC	CT	CC	GG	CT	CT	AG	CC	CC	GG	CT	AG	AG	GG	CC	AT	GG	CC	AA	AT	GG	AG	CT	AA
DACH_02	Dachshund	18.9	2.93916	female						CG		GG	GG	AT	GG	CT	TT	GG	AG	AG	CT	CT	GT		CG	CT	CT		CT	TT	AA	CC		GG		GG				TT	GG	CC			GG			AA	AA
DACH_03	Dachshund	18.9	2.93916	female	AA		AA	GG	CC	CC	AA	GG		AA		TT			AA	AA				TT		CC	TT	AA		TT			CC		CC	AA	GG	GG	CC			CC	AA	AA		AA	CC	AA	AA
DACH_04	Dachshund	18.9	2.93916	male	AA	TT	GG	GG	AA	GG	AG	AG	AG	AT	GG	TT	TT	GG	GG	GG	CC	CC	GG	AT	CG	CC	CT	AG	CT	CT	AA	CC	CC	GG	CC	GG	AA	GG	CC	AT	GG	CC	AA	TT	GG	GG	TT	AA	AA
DACH_05	Dachshund	18.9	2.93916	male	AA	TT	AA	GG	AA	CC	GG	GG	GG	TT	AA	CC	TT	GG	GG	GG	CC	TT	GG	AA	CC	CT	CC	GG	CT	CT	AG	CC	CC	GG	CT	AG	AG	GG	CC	AT	GG	CC	AA	AT	GG	AG	CT	AA	AA
DACH_06	Dachshund	18.9	2.93916	female	AA	TT	GG	GG	AA	GG	GG	AG	GG	AA	GG	TT	TT	AG	AG	AG	CT	CT	GG	AT	CG	CT	CT	GG	CT	CC	AA	CT	CT	AG	CT	GG	AA	GG	CC	AT	GG	CC	AA	TT	GG	GG	CT	AG	AA
DACH_07	Dachshund	18.9	2.93916	male	AA	TT	AA	GG	AA	CC	GG	GG	GG	TT		CC	TT	GG	GG	GG	CC	TT	GG	AA	CC	CC	CC	GG	CC	CC	GG	CC	CC	GG	TT	GG	AA	GG	CC	AA	GG	CC	AA	TT	GG	GG	TT	AA	AA
DACH_08	Dachshund	18.9	2.93916	female	AA	TT	AA	GG	AA	CC	GG	GG	GG	TT	AA	CC	TT	GG	GG	GG	CC	TT	GG	AA	CC	CT	CC	GG	CT	CT	AG	CC	CC	GG	CT	AG	AG	GG	CC	AT	GG	CC	AA	AT	GG	AG	CT	AA	AA
DACH_09	Dachshund	18.9	2.93916	female	AA	TT	GG	GG	AA	GG	AG	AG	AG	AT	GG	TT	TT	AA	AG	AG	CT	CT	GG	AA	CC	TT	CC	GG	CC	CC	AG	CC	CT	GG	TT	GG	AA	GG	CC	TT	GG	CC	AA	TT	GG	GG	TT	AA	AA
DACH_10	Dachshund	18.9	2.93916	female	AA	TT	GG	GG	AC	CG	GG	GG	GG	AT	GG	CT		GG	GG	GG	CC	CT	GG	AT		CC	CT	AG	CT	CT		CC	CC	GG	CT	GG	AA	GG	CC	TT	GG	CC	AA	TT		GG	TT	AA	AA
DACH_11	Dachshund	18.9	2.93916	male	AA	TT	AG	GG	AA	CG	GG	GG	GG	AT	GG	CT		GG	GG	GG	CC	TT	GG	AA		CT	CC	GG	CC	CC		CT	CT	AG	CT	GG	AA	GG	CC	AT	GG	CC	AA	TT		GG	TT	AA	AA
DACH_12	Dachshund	18.9	2.93916	male	AA	TT	GG	GG	AC	CG	AG	AG	AG	TT	GG	CT	TT	AG	AG	AG	CT	CT	GG	AT	CG	CC	CT	AG	CT	CT	AG	CT	CT	AG	CT	AG	AG	GG	CC	TT	GG	CC	AA	AT	GG	AG	CT	AA	AA
SPOO_06	Poodle (Standard)	57.5	4.05178	male	AG	AT	AG	AG	AC	CG	AG	GG	GG	AT	GG	CT	GT	GG	GG	GG	CC	TT	GG	AA	CC	TT	CC	GG	CC	CC	GG	CC	CC	GG	TT	GG	AA	GG	TT	TT	AA	TT	CC	TT	GG		TT	AA	AG
SPOO_07	Poodle (Standard)	57.5	4.05178	female	GG	AA	AA	AA	CC	CC	AA	GG	GG	TT	GG	CC	GG	GG	GG	GG	CC	TT	GG	AA	CC	TT	CC	GG	CC	CC	GG	CC	CC	GG	TT	GG	AA	GG	TT	TT	AA	TT	CC	TT	GG	GG	TT	AA	AG
SPOO_08	Poodle (Standard)	57.5	4.05178	male		AA		AA	CC			GG	GG		GG			GG	GG		CC	TT	GG	AA		TT	CC	GG	CC	CC		CC	CC	GG	TT	GG	AA		TT	TT	AA		CC			GG	TT		AA
SPOO_09	Poodle (Standard)	57.5	4.05178	male	AG	AT	AG	AG	AC	CG	AA	AG	AG	TT	GG	CT	GT	AG	GG	GG	CC	CT	GG		CC	CT	CC	GG	CC	CC	AG	CC	CC	GG	CT	GG	AA	GG	CT	AT	AG	CT	AC	TT	GG	GG	TT	AA	AG
SPOO_10	Poodle (Standard)	57.5	4.05178	female	AG	AT	AG	AG	AC	CG	AA	AG	AG	TT	GG	CT	GT	AG	GG	GG	CC	CT	GG	AA	CC	CT	CC	GG	CC	CC	GG	CC	CC	GG	TT	GG	AA	GG	CT	TT	AG	CT	AC	TT	GG	GG	TT	AA	AA
SPOO_11	Poodle (Standard)	57.5	4.05178	male	AG	AT	AG	GG	AC	CG	AG	AA	AG	AT	GG	CT		AA	GG	GG	CC	CC	GG	AA		CT	CC	GG	CC	CC		CT	CT	AG	CT	AG	AG	GG	CC	TT	GG	CC	AA	AT		AG	CT	AA	AA
GREY_06	Greyhound	65	4.17439	male	AG	AT	AA	GG	AC	CC	AG	GG	GG	AT	AG	CT		GG	GG	GG	CC	CC	GG	AA		TT	CC	GG	CC	CC		CC	CC	GG	CT	GG	AA	GG	CC	AT	GG	CC	AA	TT		GG	TT	AG	AA
GREY_07	Greyhound	65	4.17439	male	AG	AT	AG	GG	AA	CG	GG	AG	AG	TT	AG	CT	GT	AG	GG	GG	CC	CT	GG	AA	CC	TT	CC	GG	CC	CC	AA	CC	CT	GG	CT	AG	AA		CC	TT	GG	CT	AC	TT	GG	GG	TT	AG	AA
GREY_08	Greyhound	65	4.17439	female	AA	TT	GG	GG	AA	GG	GG	GG	GG	AA	GG	TT	TT	GG	GG	GG	CC	TT	GG	AA	CC	TT	CC	GG	CC	CC	AA	CC	CC	GG	TT	GG	AA	GG	CC	TT	GG	TT	CC	TT	GG	GG	TT	AG	AA
LAB-_05	Labrador Retriever	67.5	4.21213	female		TT		GG	AC	CC		GG	AG	TT		CC	TT	AG	GG	GG	CC	CT	GG	AA	CC	CC	CC	GG	CC	CC	AA	CC	CC	GG	CT	GG	AA		CC	TT	GG	CC	AA		GG	GG	TT	GG
LAB-_06	Labrador Retriever	67.5	4.21213	female	AA	TT	AG	GG	AA	CG	GG	GG	GG	AA	GG	TT	TT	GG	GG	GG	CC	CC	GG	AA	CC	CT	CC	GG	CC	CC	AG	CC		AG		AG	AG	GG		TT	GG	CC		TT	GG	AG		AG	AA
LAB-_07	Labrador Retriever	67.5	4.21213	female	AA	TT	AA	GG	AA	CC	GG	GG	GG	TT	AA	CC	TT	GG	GG	GG	CC	TT	GG	AA	CC	CC	CC	GG	CC	CC	AA	CC	CC	GG	TT	GG	AA	GG	CC	TT	GG	CC	AA	TT	GG	GG	TT	GG	AG
BORZ_09	Borzoi	82.5	4.4128	female	AG	AT	AA	GG	CC		AG	AG	GG		GG		GT	GG	GG		CC	TT	GG	AA	CC	TT	CC	GG	CC	CC	AA	CC	CC	GG	TT	GG	AA	GG	CC	TT	GG		CC	TT	GG	GG	TT		AA
BORZ_10	Borzoi	82.5	4.4128	male	AG	AT	AG	GG	CC	CG	AA	GG	GG	TT	AA	CT	GT	AG	GG	GG	CC	CT	GG	AA	CC	TT	CC	GG	CC	CC	AA	CC	CC	GG	TT	GG	AA	GG	CC	TT	GG	TT	CC	TT	GG	GG		AA	AA
BORZ_11	Borzoi	82.5	4.4128	male	AA	TT	AG	GG	CC	GG	AG	AG	GG	AT	AG	CT	GT	GG	GG	GG	CC	CT	GG	AA	CC	TT	CC	GG	CC	CC	AA	CC	CC	GG	TT	GG	AA	GG	CC	TT	GG	TT	CC	TT	GG	GG	TT	AA	AA
BORZ_12	Borzoi	82.5	4.4128	male	GG	AA	AA	GG	CC	CG	AA	GG	GG	TT	GG	CT	GT	AG	GG	GG	CC	TT	GG	AA	CC	TT	CC	GG	CC	CC	AA	CC	CC	GG	TT	GG	AA	GG	CC	TT	GG	CT	AC	TT	GG	GG	TT	AA	AA
BORZ_13	Borzoi	82.5	4.4128	female	AA	TT	AA	GG	CC	GG	GG	AA	GG	AA	GG	TT	TT	GG	GG	GG	CC	TT	GG	AA	CC	TT	CC	GG	CC	CC	AA	CC	CC	GG	TT	GG	AA	GG	CC	TT	GG	TT	CC	TT	GG	GG	TT	AA	AA
AKIT_13	Akita	92.5	4.52721	male	AA	AA	AA	GG	CC	CC	AA	AG	GG	AT	GG	CT	TT	AG	AG	GG	CC	CC	GG	AA	CC	CT	CC	GG	CC	CC	AG	CT	TT	AG	CC	AG	AA	GG	CC	TT	GG	CC	AA	TT	CG	GG	CC	AG	AG
AKIT_14	Akita	92.5	4.52721	female	AA	AA	AA			CC	AA	AA	GG	TT	GG	TT	TT	GG	AA	AG	CT	CC	GT		CC	CT	CC		CC	CT	AG	CC	CT	GG	CT	AG		GG	CC	AT	GG	CC	AA	TT	CG		CT	AG	GG
AKIT_15	Akita	92.5	4.52721	female	AA	AA	AA	GG	CC				GG		AG		GT	GG	AA		CC		GG	AA	CC	CT	CC		CC	CC	GG	CC	CT	GG	CT	AG	AA	GG	CC	TT	GG		AA	TT	CG
AKIT_16	Akita	92.5	4.52721	female	AA	AA	AA	GG	CC	CC	AA	AA	GG	TT	GG	TT	TT	GG	AA	GG	CC	CC	GG	AA	CC	CC	CC	GG	CC	CC	GG	CC	TT	GG	CC	AA	AA	GG	CC	TT	GG	CC	AA	TT	CC	GG	CC	GG	AG
AKIT_17	Akita	92.5	4.52721	female	AA	AT	AG	GG	AC	CG	AG	GG	GG	AT	AG	CT	GT	GG	AA	AG	CT	CC	GT	AA	CC	CT	CC	AG	CC	CT	AG	CC	CC	GG	CT	AG	AA	GG	CC	AT	GG	CC	AA	TT	GG	GG	TT	AA	GG
AKIT_18	Akita	92.5	4.52721	female	AA	AA	AA	GG	CC	CC	AA	AA	GG	TT	GG	TT	TT	GG	AA	GG	CC	CC	GG	AA	CC	CC	CC	GG	CC	CC	GG	CC	TT	GG	CC	AA	AA	GG	CC	TT	GG	CC	AA	TT	CC	GG	CC	GG	AG
AKIT_19	Akita	92.5	4.52721	female	AA	AA	AA	GG	CC	CC	AA	AA	GG	TT	GG	TT	TT	GG	AA	GG	CC	CT	GG	AA	CC	CT	CC	GG	CC	CC	GG	CC	TT	GG	CC	AA	AA	GG	CC	TT	GG	CC	AA	TT	CG	GG	CT	GG	AG
AKIT_20	Akita	92.5	4.52721	female		AA		GG	CC	CC		AA	GG	TT	GG	TT	TT	GG	AA	GG	CC	CC	GG	AA	CC	CC	CC	GG	CC	CC	GG	CC	TT	GG	CC	AA	AA		CC	TT	GG	CC	AA		CC	GG	CC	GG	GG
GPYR_09	Great Pyrenees	92.5	4.52721	female	GG	AA	AA	GG	CC		GG	AA	GG		GG		TT	GG	GG		CC	CC	GG	AA	CC	CC	CC	GG	CC	CC	AA	CC	CC	GG	CC	GG	AA	GG	CC	TT	GG		AA	TT	GG	GG	TT		AA
GPYR_10	Great Pyrenees	92.5	4.52721	female	AA	TT	GG	AG	AC	CG	AG	AA	AG	AT	GG	CT	TT	AA	GG	GG	CC	CC	GG	AA	CC	CC	CC	GG	CC	CC	AA	CC	CC	GG	CC	GG	AA	AG	CC	TT	GG	CC	AA	AT	GG	AG	CT	AA	AA
GPYR_11	Great Pyrenees	92.5	4.52721	male	AG	AT	AG	GG	AC	GG	AG	AA	AG	AT	GG	TT	TT	AG	GG	GG	CC	CC	GG	AA	CC	CC	CC	GG	CC	CC	AA	CC	CC	GG	CC	GG	AA	AG	CC	TT	GG	CC	AA	AT	GG	AG	CT	AA	AA
GPYR_12	Great Pyrenees	92.5	4.52721	male	AA	AT	AG	AG	AC		AG	AG	AG		GG		TT	AG	GG		CC	CC	GG	AA	CC	CC	CC	GG	CC	CC	AA	CC	CC	GG	CT	GG	AA	AG	CC	TT	GG		AA	AT	GG	AG	CC		AA
LEON_08	Leonberger	92.5	4.52721	male	AA	TT	GG	GG	CC	CC	AA	GG	GG	TT	GG	TT	TT	GG	GG	GG	CC	TT	GG	AA	CC	CC	TT	GG	CC	CC	AA	CC	CC	GG	TT	GG	AA	GG	CC	TT	GG	CC	AA	TT	GG	GG	TT	AA	AA
LEON_09	Leonberger	92.5	4.52721	male	AA	TT	GG	GG	CC	CC	AA	GG	GG	TT	GG	TT	TT	GG	GG	GG	CC	TT	GG	AA	CC	CC	TT	GG	CC	CC	AA	CC	CC	GG	TT	GG	AA	GG	CC	TT	GG	CC	AA	TT	GG	GG	TT	AA	AA
LEON_10	Leonberger	92.5	4.52721	male	AG	AT	AG	GG	CC	CC	AG	AG	GG	AT	GG	CT	TT	AG	GG	GG	CC	CT	GG	AA	CC	CT	CT	GG	CC	CC	AG	CC		GG		GG	AG	AG		TT	GG	CC		AT	GG	AG		AA	AA
LEON_11	Leonberger	92.5	4.52721	female	AA		GG	GG	CC		AA	GG	GG		GG		TT	GG	GG		CC	TT	GG	AA	CC	CC	TT	GG	CC	CC	AA	CC		GG		GG	AA	GG		TT	GG			TT	GG				AA
LEON_12	Leonberger	92.5	4.52721	female	AG	AT	AG	GG	CC	CC	AG	AG	GG	AT	GG	CT	TT	AG	GG	GG	CC	CT	GG	AA	CC	CC	CT	GG	CC	CC	AA	CC	CC	GG	CT	GG	AA	GG	CC	TT	GG	CC	AA	TT	GG	AG	CT	AA	AA
LEON_13	Leonberger	92.5	4.52721	female	AA	TT	GG	GG	CC	CC	AA	GG	GG	TT	GG	TT	TT	GG	GG	GG	CC	TT	GG	AA	CC	CC	TT	GG	CC	CC	AA	CC	CC	GG	TT	GG	AA	GG	CC	TT	GG	CC	AA	TT	GG	GG	TT	AA	AA
KUVZ_09	Kuvasz	93.8	4.54116	male	GG	AA	AA	GG	CC		GG	AA	GG		GG		TT	GG	GG		CC	CC	GG	AA	CC	CC	CC	GG	CC	CC	AA	CC	CC	GG	TT	GG	AA	GG	CC	TT	GG		AA	TT	GG	AA	CC		AG
KUVZ_10	Kuvasz	93.8	4.54116	male	AG	AA	AA	GG	CC		AG	AG	AG		AG		GT	GG	GG		CC	CC	GG	AA	CC	CT	CC	GG	CC	CC	AG	CC	CC	GG	TT	GG	AA	GG	CT	TT	AG		AC	TT	GG	AG	CT		AG
KUVZ_11	Kuvasz	93.8	4.54116	female	GG	AA	AA	GG	CC	CG	AG	AA	AG	AT	GG	TT	TT	GG	GG	GG	CC	CC	GG	AA	CC	CC	CC	GG	CC	CC	AG	CC		GG		GG	AA	AG		TT	GG	CC		TT	GG	AG		GG	AA
KUVZ_12	Kuvasz	93.8	4.54116	female	AG	AA	AA	GG	CC	CG	AG	AG	AG	AT	AG	CT	GT	GG	GG	GG	CC	CC	GG	AA	CC	CT	CC	GG	CC	CC	AG	CC	CC	GG	TT	GG	AA	GG	CC	TT	GG	CC	AA	TT	CG	AG	CC	AG	AG
ANAT_07	Anatolian Shepherd Dog	115	4.74493	female	AA	TT	GG	GG	AA	CG	AA	AG	AA	TT	AG	CT	GT	AG	GG	GG	CC	CC	GG	AA	CC	CT	CC	GG	CC	CC	GG	CC	CT	GG	CT	GG	AA	GG	CC	TT	GG	CC	AA	TT	CG	GG	CT	AA	AG
ANAT_08	Anatolian Shepherd Dog	115	4.74493	male	AG	AA	AG	GG	CC	GG	GG	AG	GG	AA	GG	TT	TT	GG	GG	GG	CC	TT	GG	AA	CC	CT	CC	GG	CC	CC	AG	CC	CT	GG	CT	GG	AA	GG	CC	AT	GG	CC	AA	TT	CG	GG	CC	AG	AA
NEWF_09	Newfoundland	125	4.82831	male	AA	AT	AG	GG	AC		GG	GG	AG		AA		GT	AG	AA		TT	CC	GT	AT	CG	CT	CT	AA	CT	TT	AA	CT	CT	AG	CT	AG	AG	AG	CC	TT	GG		AC	AT	GG	AG	CT		AG
NEWF_10	Newfoundland	125	4.82831	female	AG	AT	AG	GG	AA	GG	GG	GG	GG	AT	GG	CT	TT	GG	GG	GG	CC	TT	GG	AA	CC	CT	CC	GG	CC	CC	AG	CT	CT	AG	CT	GG	AA	GG	CC	AT	GG	CC	AA	TT	GG	GG	TT	GG	AG
NEWF_11	Newfoundland	125	4.82831	male	AA	AT	AG	GG	AC	GG	AG	GG	GG	AT	AG	CT	GT	GG	GG	GG	CC	TT	GG	AA	CC	CT	CC	GG	CC	CC	AG	CT	CT	AG	CT	GG	AA	GG	CC	AT	GG	CC	AA	TT	GG	GG	TT	GG	AG
NEWF_12	Newfoundland	125	4.82831	unknown	AG	AT	AG	GG	AC	CC	GG	GG	AG	TT	AA	CC	GT	AG	AG	AG	CT	CT	GT	AA	CC	TT	CC	AG	CC	CT	AA	CT	CT	AG	CT	AG	AG	AG	CC	TT	GG	CT	AC	AT	GG	AG	CT	AA	AG
NEWF_13	Newfoundland	125	4.82831	male	AA	TT	AA	AA	CC	CC	GG	GG	GG	AA	GG	CC	TT	AA	GG	GG	CC	CC	TT	AA	CC	TT	CC	GG	CC	CC	AA	CC	CC	GG	CC	GG	AA	GG	CC	TT	GG	CC	AA	TT	GG	GG	TT	AA	GG
NEWF_14	Newfoundland	125	4.82831	male	GG	AA	AG	GG	AC	CG	AG	GG	GG	TT	AG	CC	GT	GG	AG	AG	CT	CT	GG	AT	CG	CT	CT	AG	CT	CT	AA	CT	CT	AG	CC	AG	AG	AG	CC	TT	GG	CC	AA	AT	GG	AG	CT	AG	GG
NEWF_15	Newfoundland	125	4.82831	female	AA	TT	AA	AA	CC	CC	GG	GG	GG	AA	GG	CC	TT	AA	GG	GG	CC	CC	TT	AA	CC	TT	CC	GG	CT	CC	AA	CC	CC	GG	CC	GG	AA	GG	CC	TT	GG	CC	AA	TT	GG	GG	TT	AA	AG
DANE_08	Great Dane	136	4.91265	female	AA		AA	GG	CC		GG	GG	GG		GG		TT	GG	GG		CC	CC	GG	AA	CC	CC	CC	GG	CC	CC	AA	CC		GG		GG	AA	GG		AA	GG			TT	GG	GG			AG
DANE_09	Great Dane	136	4.91265	male	AG	AT	AG	GG	AA	GG	AA	AG	AG	TT	AG	CT	GT	AG	GG	GG	CC	TT	GG	AA	CC	CT	CC	GG	CC	CC	AG	CC	CT	AG	CT	GG	AA	AG	CC	AT	GG	CC	AA	TT	GG	GG	TT	AG	AA
DANE_10	Great Dane	136	4.91265	male	AA	AA	AA	GG	CC	GG	GG	GG	GG	TT	GG	TT	TT	GG	GG	GG	CC	CC	GG	AA	CC	CC	CC	GG	CC	CC	AA	CC	CC	GG	CC	GG	AA	GG	CC	AA	GG	CC	AA	TT	GG	GG	TT	AA	AA
DANE_11	Great Dane	136	4.91265	female	AG	AA	AA	GG	AC	GG	AG	GG	GG	TT	AG	CT	GT	GG	GG	GG	CC	CT	GG	AA	CC	CT	CC	GG	CC	CC	AA	CC	CT	AG	CC	GG	AA	AG	CC	AT	GG	CC	AA	TT	GG	GG	TT	AA	AG
DANE_12	Great Dane	136	4.91265	female	AG	AT	AG	GG	AC		GG	GG	GG		GG		TT	GG	GG		CC	CT	GG	AA	CC	CT	CC	GG	CC	CC	AA	CC	CC	GG	CT	GG	AA	GG	CC	AT	GG		AC	TT	GG	GG	TT		AA
DANE_13	Great Dane	136	4.91265	male	AG	AA	AA	GG	CC		GG	GG	GG		GG		TT	GG	GG		CC	CT	GG	AA	CC	CT	CC	GG	CC	CC	AA	CC		AG		GG	AA	AG		AT	GG			TT	GG	GG			AA
DANE_14	Great Dane	136	4.91265	female	AG	AT	AG	GG	AC	CG	AA	GG	GG	TT	AG	CC	GT	GG	AG	AG	CT	CT	GG	AT	CG	CC	CT	AG	CT	CT	AG	CT	CT	AG	CT	AG	AG	AG	CC	AT	GG	CC	AA	AT	GG	AG	CT	AA	AG
DANE_15	Great Dane	136	4.91265	male		AT		GG	CC			AG	AG		GG			GG	GG		CC	CT	GG	AA		CT	CC	GG	CC	CC		CC	CC	GG	CT	GG	AA		CC	AA	GG		AA			GG	TT		AA
DANE_16	Great Dane	136	4.91265	female	AG	AA	AA	GG	CC	CG	GG	GG	GG	TT	GG	CT	TT	GG	GG	GG	CC	CT	GG	AA	CC	CT	CC	GG	CC	CC	AA	CC	CT	AG	CC	GG	AA		CC	AT	GG	CC	AA	TT	GG	GG	TT	AA	AA
DANE_17	Great Dane	136	4.91265	female	AG	AA	AA	GG	AC	GG	AG	GG		TT	AG	CT		GG	GG	GG	CC	CT	GG	AA		CT	CC	GG		CC		CC	CC		CT	GG	AA	GG	CC	AA	GG	CC	AA	TT		GG	TT	AA	AG
DANE_18	Great Dane	136	4.91265	male	AG	AA	AA	GG	AC	GG	AG	GG	GG	TT	AG	CT	GT	GG	GG	GG	CC	CT	GG	AA	CC	CT	CC	GG	CC	CC	AA	CC	CC	GG	CT	GG	AA	AG	CC	AA	GG	CC	AA	TT	GG	GG	TT	AA	AA
IWOF_10	Irish Wolfhound	146.9	4.98975	female	AG	AT	GG	GG	AC		AG	GG	AG		GG		TT	GG	GG		CC	CT	GT	AA	CC	CT	CC	GG	CC	CC	AA	CC	CC	GG	CT	GG	AA	GG	CC	TT	GG		AC	TT	GG	GG	CT		AA
IWOF_11	Irish Wolfhound	146.9	4.98975	male	GG	AA	GG	GG	AA	GG	GG	GG	GG	TT	GG	TT	TT	GG	GG	GG	CC	CC	TT	AA	CC	TT	CC	GG	CC	CC	AA	CC	CC	GG	CC	GG	AA	GG	CC	TT	GG	CC	AA	TT	GG	GG	CC	GG	AA
IWOF_12	Irish Wolfhound	146.9	4.98975	female	AG	TT		GG	AC	CG	AG	AG	AG	AT	GG	TT	TT	GG	AG	AG	CT	CC	GT	AT	CG	CT	CT	AG	CT	CT	AA	CC	CC	GG	CC	AG	AG	AG	CC	TT	GG	CC	AA	AT	GG	AG	CC	AG	AA
IWOF_13	Irish Wolfhound	146.9	4.98975	female	GG	AA	GG	GG	AA	GG	GG	GG	GG	TT	GG	TT	TT	GG	GG	GG	CC	CC	TT	AA	CC	TT	CC	GG	CC	CC	AA	CC		GG		GG	AA	GG		TT	GG	CC		TT	GG	GG		GG	AA
IWOF_14	Irish Wolfhound	146.9	4.98975	female	AG	AT	GG	GG	AC	CG	AG	GG	AG	TT	GG	TT	TT	GG	GG	GG	CC	CT	GT	AA	CC	CT	CC	GG	CC	CC	AA	CC	CC	GG	CT	GG	AA	GG	CC	TT	GG	CT	AC	TT	GG	GG	CT	GG	AA
IWOF_15	Irish Wolfhound	146.9	4.98975	unknown	AG	AT	GG	GG	AC		AG	GG	AG		GG		TT	GG	GG		CC	CC	TT	AA	CC	TT	CC	GG	CC	CC	AA	CC	CC	GG	CC	GG	AA	GG	CC	TT	GG		AA	TT	GG	GG	CC		AA
IWOF_16	Irish Wolfhound	146.9	4.98975	female	AG	AT	GG	GG	AC	CG	AG	GG	AG	TT	GG	TT	TT	GG	GG	GG	CC	CT	GT	AA	CC	CC	CC	GG	CC	CC	AA	CC	CC	GG	TT	GG	AA	GG	CC	TT	GG		CC	TT	GG	GG	TT	GG	AA
IWOF_17	Irish Wolfhound	146.9	4.98975	female	GG	AA	GG	GG	AA	GG	GG	GG	GG	TT	GG	TT	TT	GG	GG	GG	CC	CC	TT	AA	CC	TT	CC	GG	CC	CC	AA	CC	CC	GG	CC	GG	AA	GG	CC	TT	GG	CC	AA	TT	GG	GG	CC	GG	AA
IWOF_18	Irish Wolfhound	146.9	4.98975	female	GG	AA	GG	GG	AA	GG	GG	GG	GG	TT	GG	TT	TT	GG	GG	GG	CC	CC	TT	AA	CC	TT	CC	GG	CC	CC	AA	CC	CC	GG	CC	GG	AA	GG	CC	TT	GG	CC	AA	TT	GG	GG	CC	GG	AA
STBD_10	Saint Bernard	155	5.04343	female	AA	AA	AA	GG	CC	GG	AA	AA	AA	TT	AA	CC	GG	GG	GG	GG	CC	TT	GG	AA	CC	CC	TT	GG	CC	CC	AA	CT	CT	AG	CT	AG	AG	AG	CC	TT	GG	CC	AA	AT	GG	AG	CT	AA	AA
STBD_11	Saint Bernard	155	5.04343	female	AA	AA	AA	GG	CC	GG	AA	AA	AA	TT	AA	CC	GG	GG	GG	GG	CC	TT	GG	AA	CC	CC	TT	GG	CC	CC	AA	CT	CT	AG	CT	AG	AG	AG	CC	TT	GG	CC	AA	AT	GG	AG	CT	AA	AA
STBD_12	Saint Bernard	155	5.04343	female	AA	AT	AG	GG	CC		AG	AG	AA		AA		GT	AG	GG		CC	CT	GG	AA	CC	CT	CT	AG	CC	CT	AA	CC	CC	GG	TT	GG	AA	GG	CC	TT	GG		AA	TT	GG	GG	TT		AA
STBD_13	Saint Bernard	155	5.04343	female	AG	AA	AA	GG	CC	GG	AA	AA	AA	TT	AG	CT	GT	AG	GG	GG	CC	TT	GG	AA	CC	CT	CT	GG	CC	CC	AA	CT	CT	AG	CT	AG	AG	AG	CC	TT	GG	CC	AA	AT	GG	AG	CT	AA	AA
MAST_13	Mastiff	182.5	5.20675	male	AA	AT	AG	GG	AC		AG	AA	GG		GG		TT	AG	AG		CT	CT	GT	AA	CC	TT	CC	AG	CC	CT	AA	CT	CT	GG	TT	GG	AA	AG	CC	AT	GG		AA	TT	GG	GG	TT		AA
MAST_14	Mastiff	182.5	5.20675	male	AA	TT	AG	GG	AC	CG	AA	AG	GG	AA	GG	TT	TT	GG	GG	GG	CC	TT	GG	AT	CG	CT	CT	AG	CT	CC	AG	CT	CT	GG	TT	GG	AA	AG	CC	TT	GG	CC	AA	AT	GG	AG	CT	GG	AA
MAST_15	Mastiff	182.5	5.20675	female	AA	TT	GG	GG	CC	CG	AG	AG	AA	TT		CC	TT	AG	GG	GG	CC	CC	GG	AA	CC	TT	CC	AG	CC	CT	AG	CC		GG		GG	AA	GG		TT	GG	CC		TT	GG	GG		AG	AA
MAST_16	Mastiff	182.5	5.20675	male	AA	TT	GG	GG	CC	GG	AA	AA	AA	TT	AA	CC	TT	GG	GG	GG	CC	CC	GG	AA	CC	TT	CC	GG	CC	CC	GG	CC	CC	GG	CC	GG	AA	GG	CC	TT	GG	CC	AA	TT	GG	GG	CC	GG	AA
MAST_17	Mastiff	182.5	5.20675	female	AA	TT	GG	GG	AC	GG	AA	AA	AG	AT	GG	CT	TT	GG	GG	GG	CC	CT	GG	AA	CC	TT	CC	GG	CC	CC	AG	CT	CT	GG	CT	GG	AA	AG	CC	TT	GG	CC	AA	TT	GG	GG	CT	GG	AA
		Number of dogs genotyped			144	145	144	146	146	116	142	150	150	116	146	116	141	150	152	116	149	149	149	145	142	151	151	145	149	151	142	149	130	148	130	151	146	140	129	151	149	115	130	145	142	142	128	116	149
		-log10(p-value)			5.72377	12.4802	12.2208	1.125	19.5774	4.92082	5.96859	12.4574	14.8811	0.031377	2.41657	4.13442	1.9859	13.0121	5.0536	4.36988	6.74909	0.180324	2.17672	6.46878	6.62635	0.798876	1.74521	5.68571	5.31587	5.15163	0.942334	1.68677	1.79452	2.12546	0.0415795	1.64149	3.82333	2.14394	0.542875	1.85761	0.608712	1.29345	2.41942	3.15144	1.5388	1.83505	0.92775	0.733063	5.20121
[truncated: 14 more columns]

## Sheet: SNPlex2
Supplemental Table S4. SNPlex genotypes and p-values.
SNPlex 2
Sample ID	Breed name	Standard breed weight (lbs)	ln(Standard breed weight)	Sex	chr4_39077210	chr4_39136792	chr4_39146955	chr4_39151457	chr4_39155348	chr4_39157587	chr4_39160122	chr4_39162539	chr4_39169359	chr4_39171780	chr4_39173680	chr4_39177331	chr4_39178162	chr4_39180879	chr4_39182836	chr4_39185468	chr4_39186025	chr4_39188533	chr4_39191032	chr4_39196184	chr4_39198677	chr4_39201941	chr4_39203218	chr4_39212292	chr4_39219357	chr4_39220227	chr4_39225202	chr4_39226019	chr4_39226092	chr4_39226291	chr4_39229383	chr4_39235304	chr4_39238115	chr4_39240234	chr4_39247369	chr4_39272817	chr4_39280492	chr4_39298109	chr4_39302193	chr7_43612056	chr7_43621551	chr7_43625935	chr7_43628687	chr7_43632594	chr7_43633660
CHIH_08	Chihuahua	4	1.38629	female	CC	CC	GG	TT	GG	CC	TT	CC	AA	CC	TT	GG	CC	GG	AA		AA	GG	GG	GG	GG	AA	GG	CC	AA	GG	GG	TT	GG	AA	GG	TT	TT	CC	AA	AA	TT	TT	AA	CC	AA	AA	AA	CC	GG
POM-_05	Pomeranian	5	1.60944	male	TT	CC	GG	TT	GG	CC	TT	CC	AA	CC	TT	GG	CC	GG	AA	GG	AA	GG	GG	GG	GG	AG	GG	CC	AA	GG	AG	CT	CG	AG	AG	CT	AT	CG	AC	AA	TT	TT	AA	CT	AA	AA	AA	CC	GG
POM-_06	Pomeranian	5	1.60944	male	CC	CC	GG	CT	CG	CC	TT	CC	AA	CC	TT	GG	CC	GG	AA	GG	AA	GG	GG	GG	GG	AA	GG	CC	AA	GG	GG	TT	GG	AA	GG	TT	TT	CC	AA	AA	TT	TT	AA	CC	AA	AA	AA	CC	GG
POM-_07	Pomeranian	5	1.60944	male	CC	CC	GG	TT	GG	CC	TT	CC	AA	CC	TT	GG	CC	GG	AA	GG	AA	GG	GG	GG	GG	AA	GG	CC	AA	GG	GG	TT	GG	AA	GG	TT	TT	CC	AA	AA	TT	TT	AA	TT	AA	AA	AA	CC	GG
POM-_08	Pomeranian	5	1.60944	male	TT	CT	AG	TT	GG	CC	TT	CC	AA	CC	TT	GG	CC	GG	AT	GG	AA	GG	GG	GG	GG	AG	GG	CC	AA	GG	GG	TT	GG	AA	GG	CT	AT	CG	AA	AA	TT	TT	AA	CT	AA	AA	AA	CC	GG
POM-_09	Pomeranian	5	1.60944	male	CT	CT	AG	TT	CG	CC	TT	CT	AA	TT	CC	CC	AC	CG	TT	CG	GG	GG	AG	GG	GG	AG	GG	CC	AA	GG	GG	TT	GG	AA	GG	CT	AT	GG	AC	AA	TT	TT	AA	TT	AA	AA	AA	CC	GG
POM-_10	Pomeranian	5	1.60944	male	TT	CC	GG	TT	GG	CC	TT	CC	AA	CC	TT	GG	CC	GG	AA	GG	AA	GG	GG	GG	GG	AA	GG	CC	AA	GG	GG	TT	GG	AA	GG	TT	TT	CC	AA	AA	TT	TT	AA	CC	AA	AA	AA	CC	GG
POM-_11	Pomeranian	5	1.60944	male	CC	CC	GG	TT	GG	CC	TT	CC	AA	CC	TT	GG	CC	GG	AA	GG	AA	GG	GG	GG	GG	AA	GG	CC	AA	GG	GG	TT	GG	AA	GG	TT	TT	CC	AA	AA	TT	TT	AA	CT	AA	AA	AA	CC	GG
POM-_12	Pomeranian	5	1.60944	female	CT	CC	GG	TT	GG	CC	TT	CC	AA	CC	TT	GG	CC	GG	AA	GG	AA	GG	GG	GG	GG	AA	GG	CC	AA	GG	GG	TT	GG	AA	GG	TT	TT	CC	AA	AA	TT	TT	AA	CC	AA	AA	AA	CC	GG
TYFX_05	Toy Fox Terrier	5.3	1.66771	male	CC	CC	GG	TT	GG	CC	TT	CC	AA	CC	TT	GG	CC	GG	AA		AA	GG	GG	GG	GG	AA	GG	CC	AA	GG	GG	TT	GG	AA	GG	TT	TT	CC	AA	AA	TT	TT	AA	CC	AA	AA	AA	CC	GG
TYFX_06	Toy Fox Terrier	5.3	1.66771	female	CC	CC	GG	TT	GG	CC	TT	CC	AA	CC	TT	GG	CC	GG	AA		AA	GG	GG	GG	GG	AA	GG	CC	AA	GG	GG	TT	GG	AA	GG	TT	TT	CC	AA	AA	TT	TT	AA	CC	AA	AA	AA	CC	GG
TYFX_07	Toy Fox Terrier	5.3	1.66771	female	CC	CT	AG	TT	CG	CC	TT	CT	AA	CC	TT	GG	CC	GG	AA		AA	GG	GG	GG	GG	AA	GG	CC	AA	GG	GG	TT	GG	AA	GG	TT	TT	CC	AA	AA	TT	TT	AA	CC	AA	AA	AA	CC	GG
TYFX_08	Toy Fox Terrier	5.3	1.66771	female	CT	CC	GG	TT	GG	CC	TT	CC	AA	CC	TT	GG	CC	GG	AA		AA	GG	GG	CG	GG	AG	GG	CC	AA	GG	GG	TT	GG	AA	GG	CT	AT	CG	AA	AA	TT	TT	AA	CC	AA	AA	AA	CC	GG
YORK_05	Yorkshire Terrier	5.5	1.70475	female	TT	TT	AA	TT	GG	CC	TT	CC	AA	CC	TT	GG	CC	GG	TT		AA	GG	GG	GG	GG	GG	GG	CC	AA	GG	AA	CC	CC	GG	AA	CC	AA	GG	CC	AA	TT	TT	AA	CC	AA	AA	AA	CC	GG
YORK_06	Yorkshire Terrier	5.5	1.70475	female	TT	CT	AG	TT	GG	CC	TT	CC	AA	CC	TT	GG	CC	GG	AT		AA	GG	GG	GG	GG	AG	GG	CC	AA	GG	AG	CT	CG	AG	AG	CT	AT	CG	AC	AA	TT	TT	AA	CC	AA	AA	AA	CC	GG
YORK_07	Yorkshire Terrier	5.5	1.70475	male	CT	TT	AA	TT	CG	CC	TT	CC	AA	CC	TT	GG	CC	GG	TT		AA	GG	GG	GG	GG	GG	GG	CC	AA	GT	AG	CC	CC	GG	AG	CC	AA	GG	AC	AG	CT	CT	AT	CC	AA	AA	AA	CC	GG
YORK_08	Yorkshire Terrier	5.5	1.70475	male	TT	CT	AG	TT	GG	CC	TT	CC	AA	CC	TT	GG	CC	GG	AT		AA	GG	GG	GG	GG	AG	GG	CC	AA	GG	AG	CT	CG	AG	AG	CT	AT	CG	AC	AA	TT	TT	AA	CC	AA	AA	AA	CC	GG
YORK_09	Yorkshire Terrier	5.5	1.70475	male	TT	CT	AG	TT	GG	CC	TT	CC	AA	CC	TT	GG	CC	GG	AT		AA	GG	GG	GG	GG	AG	GG	CC	AA	GG	AG	CT	CG	AG	AG	CT	AT	CG	AC	AA	TT	TT	AA	CC	AA	AA	AA	CC	GG
YORK_10	Yorkshire Terrier	5.5	1.70475	female	CC	CT	AG	TT	CG	CC	TT	CC	AA	CC	TT	GG	CC	GG	AT		AA	GG	GG	GG	GG	AG	GG	CC	AA	GT	GG	CT	CG	AG	GG	CT	AT	CG	AA	AG	CT	CT	AT	CC	AA	AA	AA	CC	GG
PAPI_05	Papillon	6.1	1.80829	female	CC	CC	GG	TT	GG	CC	TT	CC	AA	CC	TT	GG	CC	GG	AA		AA	GG	GG	GG	GG	AA	GG	CC	AA	GG	GG	TT	GG	AA	GG	TT	TT	CC	AA	AA	TT	TT	AA	CT	AA	AA	AA	CC	GG
PAPI_06	Papillon	6.1	1.80829	female	CC	CC	GG	TT	GG	CC	TT	CC	AA	CC	TT	GG	CC	GG	AA		AA	GG	GG	GG	GG	AA	GG	CC	AA	GG	GG	TT	GG	AA	GG	TT	TT	CC	AA	AA	TT	TT	AA	CC	AA	AA	AA	CC	GG
PAPI_07	Papillon	6.1	1.80829	male	CC	CC	GG	TT	GG	CC	TT	CC	AA	CC	TT	GG	CC	GG	AA		AA	GG	GG	GG	GG	AA	GG	CC	AA	GG	GG	TT	GG	AA	GG	TT	TT	CC	AA	AA	TT	TT	AA	TT	AA	AA	AA	CC	GG
PAPI_08	Papillon	6.1	1.80829	male	CC	CC	GG	TT	GG	CC	TT	CC	AA	CC	TT	GG	CC	GG	AA		AA	GG	GG	GG	GG	AA	GG	CC	AA	GG	GG	TT	GG	AA	GG	TT	TT	CC	AA	AA	TT	TT	AA	CC	AA	AA	AA	CC	GG
PAPI_09	Papillon	6.1	1.80829	female	CC	CC	GG	TT	GG	CC	TT	CC	AA	CC	TT	GG	CC	GG	AA		AA	GG	GG	GG	GG	AA	GG	CC	AA	GG	GG	TT	GG	AA	GG	TT	TT	CC	AA	AA	TT	TT	AA	CT	AA	AA	AA	CC	GG
PAPI_10	Papillon	6.1	1.80829	female	CC	CC	GG	TT	GG	CC	TT	CC	AA	CC	TT	GG	CC	GG	AA		AA	GG	GG	GG	GG	AA	GG	CC	AA	GG	GG	TT	GG	AA	GG	TT	TT	CC	AA	AA	TT	TT	AA	CT	AA	AA	AA	CC	GG
PAPI_11	Papillon	6.1	1.80829	female	CC	CC	GG	TT	GG	CC	TT	CC	AA	CC	TT	GG	CC	GG	AA		AA	GG	GG	GG	GG	AA	GG	CC	AA	GG	GG	TT	GG	AA	GG	TT	TT	CC	AA	AA	TT	TT	AA	CT	AA	AA	AA	CC	GG
PAPI_13	Papillon	6.1	1.80829	male	CT	CT	AG	TT	GG	CC	TT	CC	AA	CC	TT	GG	CC	GG	AT		AA	GG	GG	GG	GG	AG	GG	CC	AA	GG	AG	CT	CG	AG	AG	CT	AT	CG	AC	AA	TT	TT	AA
TPOO_07	Poodle (Toy)	6.1	1.80829	female	CT	CT	AG	TT		CC	TT	CC	AA	CC	TT	GG	CC	GG	AT	GG	AA	GG	GG	GG	GG	AA	GG	CC	AA	GT	GG	TT	GG	AA	GG	CT	TT	CG	AA	AA	TT	TT	AA	CT	AA	AA	AA	CC	GG
TPOO_08	Poodle (Toy)	6.1	1.80829	female	CT	CT	AG	TT	GG	CC	TT	CC	AA	CC	TT	GG	CC	GG	AT		AA	GG	GG	GG	GG	AG	GG	CC	AA	GG	GG	TT	GG	AA	GG	CT	AT	CG	AC	AG	CT	CT	AT	CT	AA	AG	AG	CC	GG
TPOO_09	Poodle (Toy)	6.1	1.80829	male	CT	CT	AG		GG	CC		CC	AA	CC	TT	GG	CC	GG	AT		AA	GG	GG	GG	GG	AG	GG	CC	AA	GG	GG	TT	GG	AA	GG	CT	AT	CC		AA	TT	TT	AA	CT		AA	AA	CC
TPOO_10	Poodle (Toy)	6.1	1.80829	male	CT	CT	AG		CG	CC		CT	AC	CT	CT	CG	CC	CG	TT	GG	AG	GG	GG	GG	GG	AG	GG	CC	AA	GG	GG	TT	GG	AA	GG	CT	AT	CC		AG	CT	CT	AT	TT	AA	AG	AG	CC
TPOO_11	Poodle (Toy)	6.1	1.80829	female	CT	CT	AG		GG	CC		CC	AA	CC	TT	GG	CC	GG	AT		AA	GG	GG	GG	GG	GG	GG	CC	AA	GG	GG	TT	GG	AA	GG	CC	AA	GG		AA	TT	TT	AA	CT	AG	AA	AA	CC
TPOO_12	Poodle (Toy)	6.1	1.80829	female	CT	CT	AG	TT	GG	CC	CT	CC	AA	CC	TT	GG	CC	GG	AT			GG	GG	GG	GG	AG	GG	CC	AA	GG	GG		GG	AA	GG	CT	AT	CG	AA	AA	TT	TT	AA	CT	AA	AA	AA	CC	GG
TPOO_13	Poodle (Toy)	6.1	1.80829	female	CC	CC	GG		GG	CC		CC	AA	CC	TT	GG	CC	GG	AA	GG	AA	GG	GG	GG	GG	AA	GG	CC	AA	GG	GG	TT	GG	AA	GG	TT	TT	CC		AA	TT	TT	AA	TT	AA	AG	AG	CC
TPOO_14	Poodle (Toy)	6.1	1.80829	male	TT	TT	AA		GG	CC		CC	AA	CC	TT	GG	CC	GG	TT		AA	GG	GG	GG	GG	GG	GG	CC	AA	GG	GG	TT	GG	AA	GG	CC	AA	GG		AA	TT	TT	AA	TT	AA	AG	AG	CC
BRUS_05	Brussels Griffon	9	2.19722	female	CT	CC	GG	TT	GG	CC	TT	CC	AA	CC	TT	GG	CC	GG	AA		AA	GG	GG	GG	GG	AG	GG	CC	AA	GG	AG	CT	CG	AG	AG	CT	AT	CG	AC	AA	TT	TT	AA	CC	AA	AA	AA	CC	GG
MPIN_06	Miniature Pinscher	9	2.19722	male	CC		AG	TT	GG	CC	TT	CC	AA	CC	TT	GG	CC	GG	AA	GG	AA	GG	GG	GG	GG	AA	GG	CC	AA	GG	GG	TT	GG	AA	GG	TT	TT	CC	AA	AA	TT	TT	AA		AA	AA	AA	CC	GG
MPIN_08	Miniature Pinscher	9	2.19722	male	CT	CT	AG	TT	GG	CC	TT	CC	AA	CC	TT	GG	CC	GG	AA		AA	GG	GG	GG	GG	AA	GG	CC	AA	GG	GG	TT	GG	AA	GG	TT	TT	CC	AA	AA	TT	TT	AA	CC	AA	AA	AA	CC	GG
MPIN_09	Miniature Pinscher	9	2.19722	male	CC	CT	AG	TT	GG	CC	TT	CC	AA	CC	TT	GG	CC	GG	AA		AA	GG	GG	GG	GG	AA	GG	CC	AA	GG	GG	TT	GG	AA	GG	TT	TT	CC	AA	AA	TT	TT	AA	CC	AA	AA	AA	CC	GG
MPIN_10	Miniature Pinscher	9	2.19722	female	CC	CC	GG	TT	GG	CC	TT	CC	AA	CC	TT	GG	CC	GG	AA		AA	GG	GG	GG	GG	AA	GG	CC	AA	GG	GG	TT	GG	AA	GG	CT	AT	CG	AA	AA	TT	TT	AA	CC	AA	AA	AA	CC	GG
MPIN_12	Miniature Pinscher	9	2.19722	male	CC		GG	TT	GG	CC	TT	CC	AA	CC	TT	GG	CC	GG	AA	GG	AA	GG	GG	GG	GG	AA	GG	CC	AA	GG	GG	TT	GG	AA	GG	CT	AT	CG	AA	AA	TT	TT	AA		AA	AA	AA	CC	GG
MPIN_13	Miniature Pinscher	9	2.19722	female	CC		GG	TT	GG	CC	TT	CC	AA	CC	TT	GG	CC	GG	AA	GG	AA	GG	GG	GG	GG	AA	GG	CC	AA	GG	GG	TT	GG	AA	GG	TT	TT	CC	AA	AA	TT	TT	AA		AG	AG	AG	CC	GG
MPIN_14	Miniature Pinscher	9	2.19722	female	CC		AG	TT	GG	CC	TT	CC	AA	CC	TT	GG	CC	GG	AA	GG	AA	GG	GG	GG	GG	AA	GG	CC	AA	GG	GG	TT	GG	AA	GG	TT	TT	CC	AA	AA	TT	TT	AA
PEKE_05	Pekingese	9.5	2.25129	female	CT	CT	AG	TT	CG	CC	TT	CT	AC	CC	CT	GG	CC	GG	AT	GG	AG	GG	AG	GG	GG	AG	GG	CC	AA	GG	GG	TT	GG	AA	GG	TT	TT	CG	AC	AG	CT	CT	AT	CC	AA	AA	AA	CC	GG
PEKE_06	Pekingese	9.5	2.25129	male	CC	CC	GG	TT	GG	CC	TT	CC	AA	CC	TT	GG	CC	GG	AA	GG	AA	GG	GG	GG	GG	AA	GG	CC	AA	GG	GG	TT	GG	AA	GG	TT	TT	CC	AA	AA	TT	TT	AA	CC	AA	AA	AA	CC	GG
PEKE_07	Pekingese	9.5	2.25129	male	CT	CC	GG	TT	GG	CC	TT	CC	AA	CC	TT	GG	CC	GG	AA	GG	AA	GG	GG	GG	GG	AA	GG	CC	AA	GG	GG	TT	GG	AA	GG	TT	TT	CC	AA	AA	TT	TT	AA	CC	AA	AA	AA	CC	GG
PEKE_08	Pekingese	9.5	2.25129	female	TT	CT	AG	TT	CG	CC	TT	CT	AC	CC	CT	GG	CC	GG	AT	GG	AG	GG	AG	GG	GG	AG	GG	CC	AA	GG	GG	TT	GG	AA	GG	TT	TT	CG	AC	AG	CT	CT	AT	CT	AA	AA	AA	CC	GG
PEKE_09	Pekingese	9.5	2.25129	female	CT	CC	GG	TT	GG	CC	TT	CC	AA	CC	TT	GG	CC	GG	AA	GG	AA	GG	GG	GG	GG	AA	GG	CC	AA	GG	GG	TT	GG	AA	GG	TT	TT	CC	AA	AA	TT	TT	AA	CC	AA	AA	AA	CC	GG
PEKE_10	Pekingese	9.5	2.25129	male	CT	CC	GG	TT	GG	CC	TT	CC	AA	CC	TT	GG	CC	GG	AA	GG	AA	GG	GG	GG	GG	AA	GG	CC	AA	GG	GG	TT	GG	AA	GG	TT	TT	CC	AA	AA	TT	TT	AA	CC	AA	AA	AA	CC	GG
PEKE_11	Pekingese	9.5	2.25129	female	CT	CC	GG	TT	GG	CC	TT	CC	AA	CC	TT	GG	CC	GG	AA	GG	AA	GG	GG	GG	GG	AA	GG	CC	AA	GG	GG	TT	GG	AA	GG	TT	TT	CC	AA	AA	TT	TT	AA	CC	AA	AA	AA	CC	GG
PEKE_12	Pekingese	9.5	2.25129	male	CC	CC	GG	TT	GG	CC	TT	CC	AA	CC	TT	GG	CC	GG	AA	GG	AA	GG	GG	GG	GG	AA	GG	CC	AA	GG	GG	TT	GG	AA	GG	TT	TT	CC	AA	AA	TT	TT	AA	TT	AA	GG	GG	CC	GG
PEKE_13	Pekingese	9.5	2.25129	male	CC	CC	GG	TT	GG	CC	TT	CC	AA	CC	TT	GG	CC	GG	AA	GG	AA	GG	GG	GG	GG	AA	GG	CC	AA	GG	GG	TT	GG	AA	GG	TT	TT	CC	AA	AA	TT	TT	AA	CC	AA	AA	AA	CC	GG
SILK_07	Silky Terrier	10	2.30259	male	CC	CC	GG	TT	CG	CC	TT	CT	AC	CT	CT	CG	CC	CG	AT	GG	AG	GG	GG	GG	GG	AA	GG	CC	AA	GG	GG	TT	GG	AA	GG	TT	TT	CC	AC	AG	CT	CT	AT	CC	AA	AA	AA	CC	GG
SILK_08	Silky Terrier	10	2.30259	male	CC	CC	GG	TT	GG	CC	TT	CC	AA	CC	TT	GG	CC	GG	AA		AA	GG	GG	GG	GG	AA	GG	CC	AA	GG	GG	TT	GG	AA	GG	TT	TT	CC	AC	AG	CT	CT	AT	CC	AA	AA	AA	CC	GG
ITGY_06	Italian Greyhound	11.3	2.4248	female	CT	TT	AA	CT	CG	CC	TT	CT	AA	CT	CT	GG	CC	GG	TT		AA	GG	GG	GG	AG	GG	GG	CC	AA	GT	AG	CT	CG	AG	AG	CT	AT	GG	AC	AG	CT	CT	AT	CC	AA	AA	AA	CC	GG
ITGY_07	Italian Greyhound	11.3	2.4248	female	CC	TT	AA	CC	CC	CC	TT	TT	AA	TT	CC	GG	CC	GG	TT		AA	GG	GG	GG	AA	GG	GG	CC	AA	TT	GG	TT	GG	AA	GG	TT	TT	GG	CC	GG	CC	CC	TT	CC	AA	AA	AA	CC	GG
NOWT_05	Norwich Terrier	12	2.48491	female	CC		GG	TT	CG	CC	TT	CC	AA	CC	TT	GG	CC	GG	AT	GG	AA	GG	GG	GG	GG	AG	GG	CC	AA	GT	GG	CT	CG		GG	CT	AT	CG	AA	AG	TT	TT	AT		AA	AA	AA	CC	GG
NOWT_06	Norwich Terrier	12	2.48491	male	CC		GG	TT	CG	CC	TT	CC	AA	CC	TT	GG	CC	GG	AT	GG	AA	GG	GG	GG	GG	AG	GG	CC	AA	GT	GG	CT	CG		GG	CT	AT	CG	AA	AG	TT	TT	AT				AG		GG
HAVA_07	Havanese	12.1	2.49321	female	CC	CC	GG	TT	GG	CC	TT	CC	AA	CC	TT	GG	CC	GG	AA	GG	AA	GG	GG	GG	GG	AA	GG	CC	AA	GG	GG	TT	GG	AA	GG	TT	TT	CC	AA	AA	TT	TT	AA	CT	AA	AA	AA	CC	GG
HAVA_08	Havanese	12.1	2.49321	male	TT	TT	AA	TT	CG	CC	TT	CT	AC	CC	CT	GG	CC	GG	AT	GG	AG	GG	GG	GG	AG	AG	GG	CC	AA	GT	GG	CT	CG	AG	GG	CT	AT	CG	AA	AG	TT	TT	AT	CC	AA	AA	AA	CC	GG
HAVA_09	Havanese	12.1	2.49321	female	CC	CC	AG	TT	GG	CC	TT	CC	AA	CC	TT	GG	CC	GG	AT	GG	AA	GG	GG	GG	GG	AG	GG	CC	AA	GG	GG	TT	GG	AA	GG	CT	AT	CG	AA	AA	TT	TT	AA	CC	AA	AA	AA	CC	GG
HAVA_10	Havanese	12.1	2.49321	female	CC	CC	GG	TT	GG	CC	TT	CC	AA	CC	TT	GG	CC	GG	AA	GG	AA	GG	GG	GG	GG	AA	GG	CC	AA	GG	GG	TT	GG	AA	GG	TT	TT	CC	AA	AA	TT	TT	AA	CC	AA	AA	AA	CC	GG
HAVA_11	Havanese	12.1	2.49321	male	CC	CC	AG	TT	GG	CC	TT	CC	AA	CC	TT	GG	CC	GG	AT	GG	AA	GG	GG	GG	GG	AG	GG	CC	AA	GG	GG	TT	GG	AA	GG	CT	AT	CG	AA	AA	TT	TT	AA	CC	AA	AA	AA	CC	GG
HAVA_12	Havanese	12.1	2.49321	male	CC	CC	GG	CT	CG	CC	CT	CT	AA	CT	CT	CG	CC	CG	AT	CG	AG	GG	AG	GG	GG	AA	GG	CC	AA	GG	GG	TT	GG	AA	GG	TT	TT	CC	AC	AG	CT	CT	AT	CC	AA	AA	AA	CC	GG
HAVA_13	Havanese	12.1	2.49321	male	CC	CC	GG	TT	GG	CC	TT	CT	AC	CT	CT	GG	CC	GG	AA		AA	GG	GG	GG	GG	AA	GG	CC	AA	GG	GG	TT	GG	AA	GG	TT	TT	CC	AA	AA	TT	TT	AA	CT	AG	AG	AG	CT	AG
SHIH_05	Shih Tzu	12.5	2.52573	male	CT	CC	GG	TT	GG	CC	TT	CC	AA	CC	TT	GG	CC	GG	AA	GG	AA	GG	GG	GG	GG	AA	GG	CC	AA	GG	GG		GG	AA	GG	TT	TT	CC	AA	AA	TT	TT	AA	CC	AA	AA	AA	CC	GG
SHIH_06	Shih Tzu	12.5	2.52573	male	CC	CC	GG	TT	GG	CC	TT	CC	AA	CC	TT	GG	CC	GG	AA	GG	AA	GG	GG	GG	GG	AA	GG	CC	AA	GG	GG	TT	GG	AA	GG	TT	TT	CC	AA	AA	TT	TT	AA	CC	AA	AA	AA	CC	GG
SHIH_07	Shih Tzu	12.5	2.52573	female	CT	CC	GG	TT	GG	CC	TT	CC	AA	CC	TT	GG	CC	GG	AA	GG	AA	GG	GG	GG	GG	AA	GG	CC	AA	GG	GG	TT	GG	AA	GG	TT	TT		AA	AA	TT	TT	AA	CT	AA	AG	AG	CC	GG
SHIH_08	Shih Tzu	12.5	2.52573	female	CT	CC	GG	TT	GG	CC	TT	CC	AA	CC	TT	GG	CC	GG	AA	GG	AA	GG	GG	GG	GG	AA	GG	CC	AA	GG	GG	TT	GG	AA	GG	TT	TT	CC	AA	AA	TT	TT	AA	CC	AA	AA	AA	CC	GG
MPOO_05	Poodle (Miniature)	17	2.83321	male	CC	CC	GG		CC	CC			AC	CT	CT	CG	CC	CG	TT		AG	GG	GG	GG	GG	AA	GG	CC	AA	GT	GG		GG	AA	GG	CT	TT	CC			CT	CT	AT	TT	AA	GG	GG	CC
MPOO_06	Poodle (Miniature)	17	2.83321	male	TT	TT	AA	TT	GG	CC		CC	AA	CC	TT	GG	CC	GG	TT	GG	AA	GG	GG	GG	GG	GG	GG	CC	AA	GG	GG	TT	GG	AA	GG	CC	AA	GG	AA	AA	TT	TT	AA	CC	AA	AA	AA	CC	GG
MPOO_07	Poodle (Miniature)	17	2.83321	female	CT	CT	AG	TT	CG	CC		CC	AA	CC	TT	GG	CC	GG	TT	GG	AA	GG	GG	GG	GG	AG	GG	CC	AA	GT	GG	TT	GG	AA	GG	CC	AT	GG	AA	AA	TT	TT	AA	CT	AA	AA	AA	CC	GG
MPOO_08	Poodle (Miniature)	17	2.83321	female	TT	TT	AA	TT	GG	CC		CC	AA	CC	TT	GG	CC	GG	TT	GG	AA	GG	GG	GG	GG	GG	GG	CC	AA	GG	GG	TT	GG	AA	GG	CC	AA	GG	AA	AG	TT	TT	AT	CT	AA	AA	AA	CC	GG
MPOO_09	Poodle (Miniature)	17	2.83321	female	TT	CT	AG		GG	CC		CC	AA	CC	TT	GG	CC	GG	AT	GG	AA	GG	GG	GG	GG	AG	GG	CC	AA	GG	GG	TT	GG	AA	GG	CT	AT	CC		AA	TT	TT	AA	CT	AA	AA	AA	CC
MPOO_10	Poodle (Miniature)	17	2.83321	male	CT	CT	AG	TT	CG	CC		CC	AA	CC	TT	GG	CC	GG	TT	GG	AA	GG	GG	GG	GG	AG	GG	CC	AA	GT	GG	TT	GG	AA	GG	CC	AT	GG	AA	AA	TT	TT	AA	TT	AA	GG	GG	CC	GG
MPOO_11	Poodle (Miniature)	17	2.83321	male	CC	CC	GG	TT	CC	CC		CC	AA	CC	TT	GG	CC	GG	TT	GG	AA	GG	GG	GG		AA	GG	CC	AA	TT	GG	TT	GG	AA	GG	CC	TT	GG	AA	AA	TT	TT	AA	CT	AA	AG	AG	CC	GG
MPOO_12	Poodle (Miniature)	17	2.83321	male	TT	TT	AA	TT	GG	CC		CC	AA	CC	TT	GG	CC	GG	TT	GG	AA	GG	GG	GG	GG	GG	GG	CC	AA	GG	GG	TT	GG	AA	GG	CC	AA	GG	AA	AA	TT	TT	AA	CT	AA	AA	AA	CC	GG
MPOO_13	Poodle (Miniature)	17	2.83321	male	CT	CT	AG		CG	CC		CC	AA	CC	TT	GG	CC	GG	TT	GG	AA	GG	GG	GG	GG	AG	GG	CC	AA	GT	GG	TT	GG	AA	GG	CC	AT	GG		AA	TT	TT	AA	TT	AA	AG	GG	CC
MPOO_14	Poodle (Miniature)	17	2.83321	male	CT	CT	AG	TT	CG	CC		CC	AA	CC	TT	GG	CC	GG	TT	GG	AA	GG	GG	GG	GG	AG	GG	CC	AA	GT	GG	TT	GG	AA	GG	CC	AT	GG	AA	AA	TT	TT	AA	TT	AA	AA	AA	CC	GG
MPOO_15	Poodle (Miniature)	17	2.83321	male	TT	TT	AA	TT	GG	CC		CC	AA	CC	TT	GG	CC	GG	TT	GG	AA	GG	GG	GG	GG	GG	GG	CC	AA	GG	GG	TT	GG	AA	GG	CC	AA	GG	AA	AA	TT	TT	AA	CT	AA	AG	AG	CC	GG
MPOO_16	Poodle (Miniature)	17	2.83321	male	CT	CT	AG	TT	CG	CC		CC	AA	CC	TT	GG	CC	GG	TT	GG	AA	GG	GG	GG	GG	AG	GG	CC	AA	GT	GG	TT	GG	AA	GG	CC	AT	GG	AA	AA	TT	TT	AA	CT	AA	AG	AG	CC	GG
AUST_07	Australian Terrier	18.5	2.91777	female	CC		AG	TT	GG	CC	TT	CC	AA	CC	TT	GG	CC	GG	AT	GG	AA	GG	GG	GG	GG	AG	GG	CC	AA	GT	GG	CT	CG	AG	GG	CT	AT	CG	AA	AG	TT	CT	AT		AG	AG	AG	CT
AUST_08	Australian Terrier	18.5	2.91777	male	CT		AG	TT	GG	CC	TT	CC	AA	CC	TT	GG	CC	GG	AT	GG	AA	GG	GG	GG	GG	AG	GG	CC	AA	GG	AG	CT	CG	AG	AG	CT	AT	CG	AC	AA	TT	TT	AA		AG	AG	AG	CC
AUST_09	Australian Terrier	18.5	2.91777	male	CT			TT	GG	CC	TT	CC	AA	CC	TT	GG	CC	GG		GG	AA	GG	GG	GG	GG	AG	GG		AA	GG	GG	TT	GG		GG	CT	AT	CG	AA	AA	TT	TT	AA		AA	AA	AA	CC	GG
AUST_10	Australian Terrier	18.5	2.91777	male	CC		GG	TT	GG	CC	TT	CC	AA	CC	TT	GG	CC	GG	AA	GG	AA	GG	GG	GG	GG	AA	GG	CC	AA	GG	GG	TT	GG	AA	GG	TT	TT	CC	AA	AA	TT	TT	AA		AG	AG	AG	CC	GG
AUST_11	Australian Terrier	18.5	2.91777	male	CT		AG	TT	GG	CC	TT	CC	AA	CC	TT	GG	CC	GG	AT	GG	AA	GG	GG	GG	GG	AG	GG	CC	AA	GG	GG	TT	GG	AA	GG	CT	AT	CG	AA	AA	TT	TT	AA		AG	AG	AG	CC
AUST_12	Australian Terrier	18.5	2.91777	female	CC		AG	TT	GG	CC	TT	CC	AC	CT	CT	GG	CC	GG	TT		AA	GG	GG	GG	AG	GG	GG	CC	AA	TT	GG	CC	CC	GG	GG	CC	AA	GG	AA	GG	TT	CC	TT		AG	AG	AG	CT	AG
WHWT_05	West Highland White Terrier	18.5	2.91777	female	CC		AG	TT	CG	CC	TT	CT	AA	CC	TT	GG	CC	GG	AT	GG	AA	GG	GG	GG	GG	AG	GG	CC	AA	GG	GG	TT	GG	AA	GG	CT	AT	CG	AA	AA	TT	TT	AA		AA	AA	AA	CC	GG
WHWT_06	West Highland White Terrier	18.5	2.91777	male	CC		AG	TT	CG	CC	TT	CT	AA	CC	TT	GG	CC	GG	AT	GG	AA	GG	GG	GG	GG	AG	GG	CC	AA	GG	GG	TT	GG	AA	GG	CT	AT	CG	AA	AA	TT	TT	AA		AA	AA	AA	CC	GG
WHWT_07	West Highland White Terrier	18.5	2.91777	female	CC		AG	CT	CC	CC	CT	TT	AC	CT	CT	CG	AC	GG	TT	CG	AA	AG	GG	GG	AG	GG	AG	CT	AG	GT	AG	CT	CG	AG	AG	CC	AA	GG	AC	AG	TT	CT	AT		AA	AA	AA	CC	GG
WHWT_08	West Highland White Terrier	18.5	2.91777	female	CC		GG	CT	CG	CC	TT	CT	AC	CT	CT	CG	CC	CG	AT	CG	AG	GG	AG	GG	GG	AA	GG	CC	AA	GT	GG	CT	CG	AG	GG	CT	AT	CG	AA	AG	TT	TT	AT		AA	AG	AG	CC	GG
DACH_06	Dachshund	18.9	2.93916	female	TT	TT	AA		GG	CC		CC	AA	CC	TT	GG	CC	GG	TT	CG	AG	GG	AG	CG	GG	GG	GG	CC	AA	GG	AG	CT	CG	AG	AG	CC	AA	GG		AG	TT	TT	AT	CT	AG
DACH_07	Dachshund	18.9	2.93916	male	CC	CC	GG		CC	CC		CC	AA	CC	TT	GG	CC	GG	TT	GG	AA	GG	GG	GG	GG	GG	GG	CC	AA	TT	GG	CC	CC	GG	GG	CC	AA	GG		GG			TT	CC	AA	AG	AG	CC
DACH_08	Dachshund	18.9	2.93916	female	CC	CC	GG		CC	CC		CC	AA	CC	TT	GG	CC	GG	TT		AA	GG	GG	GG	GG	GG	GG	CC	AA	TT	GG	CC	CC	GG	GG	CC	AA	GG		GG			TT	CC	AA	AA	AA	CC
DACH_13	Dachshund	18.9	2.93916	male	CC	CC	GG		CG	CT		CT	AC	CT	CT	CG	CC	CG	AT	CG	AG	GG	GG	GG	AG	AA	GG	CC	AA	GT	GG	TT	GG	AA	GG	CT	AT	CC		AA	TT	TT	AT	CC	AG	AG	AG	CC
DACH_14	Dachshund	18.9	2.93916	male	CC	CC	GG		CG	CC		CC	AA	CT	CT	CG	CC	CG	AT	CG	AG	GG	AG	GG	GG	AA	GG	CC	AA	GG	GG	TT	GG	AA	GG	CT	AT	CC		AG	CT	CT	AT	CT	AG	AG	AG
DACH_15	Dachshund	18.9	2.93916	male	CT	CT	AG		CG	CT		CT	AC	CT	CT	CG	CC	CG	TT	CC	GG	GG	AG	CG	AG	AG	GG	CC	AA	GT	AG	CT	CG	AG	AG	CC	AA	GG		AA	TT	TT	AT	CC	AA	AA	AA	CC
DACH_16	Dachshund	18.9	2.93916	female	TT	TT	AA		GG	CC		CC	AA	CC	TT	GG	CC	GG	TT	GG	AA	GG	GG	GG	GG	GG	GG	CC	AA	GG	GG	TT	GG	AA	GG	CT	AT	GG		AG	TT	TT	AT	CC	AA	AA	AA	CC
DACH_17	Dachshund	18.9	2.93916	male	CT	CT	AG		CG	CT		CT	AC	CT	CT	CG	CC	CG	TT	CC	GG	GG	AG	CG	AG	AG	GG	CC	AA	GT	AG	CT	CG	AG	AG	CC	AA	GG		AA	TT	TT	AT
SSHP_06	Shetland Sheepdog	22.1	3.09558	female	CT	TT	AA	TT	GG	CC	TT	CC	AA	CC	TT	GG	CC	GG	TT	GG	AA	GG	GG	GG	GG	GG	GG	CC	AA	GG	GG	TT	GG	AA	GG	CC	AA	GG	AA	AA	TT	TT	AA	TT	AA	AA	AA	CC	GG
SSHP_07	Shetland Sheepdog	22.1	3.09558	female	CT	TT	AA	TT	GG	CC	TT	CC	AA	CC	TT	GG	CC	GG	TT	GG	AA	GG	GG	GG	GG	GG	GG	CC	AA	GG	GG	TT	GG	AA	GG	CC	AA	GG	AA	AA	TT	TT	AA	CT	AG	GG	GG	CC	GG
SSHP_08	Shetland Sheepdog	22.1	3.09558	female	CC	TT	AA	TT	GG	CC	TT	CC	AA	CC	TT	GG	CC	GG	TT	GG	AA	GG	GG	GG	GG	GG	GG	CC	AA	GG	GG	TT	GG	AA	GG	CC	AA	GG	AA	AA	TT	TT	AA	TT	AA	AG	AG	CC	GG
SSHP_09	Shetland Sheepdog	22.1	3.09558	male	CC	TT	AA	TT	GG	CC	TT	CC	AA	CC	TT	GG	CC	GG	TT	GG	AA	GG	GG	GG	GG	GG	GG	CC	AA	GG	GG	TT	GG	AA	GG	CC	AA	GG	AA	AA	TT	TT	AA	CT	AA	AA	AA	CC	GG
BSJI_06	Basenji	22.5	3.11352	female	TT		AA	CC	CC	CT	TT	TT	CC	TT	CC	CC	AC	GG	TT	CC	AG	GG	AA	GG	GG	AG	GG	CC	AA	GT	GG	TT	GG	AA	GG	CC	AA	GG	AA	GG	TT	TT	TT		AA	AA	AA	CC	GG
FBUL_06	French Bulldog	25	3.21888	male	CT		AA	TT	CC	CC	TT	TT	AC	CT	CT	CG	CC	CG	AT	GG	AG	GG	GG	GG	GG	AA	GG	CC	AA	GG	GG	TT	GG	AA	GG	TT	TT	CC	AC	AG	CT	CT	AT		AA	AA	AA	CC	GG
PEMB_07	Pembroke Welsh Corgi	26	3.2581	female	CC		GG	TT	GG	CC	TT	CC	AA	CC	TT	GG	CC	GG	AA	GG	AA	GG	GG	GG	GG	AA	GG	CC	AA	GG	GG	TT	GG	AA	GG	CT	AT	CG	AA	AG	TT	CT	AT		AA	AA	AG	CC	GG
PEMB_08	Pembroke Welsh Corgi	26	3.2581	female	CC		AA	CC	CC	TT	TT	TT	CC	TT	CC	GG	CC	GG	TT	GG	AA	GG	GG	GG	GG	GG	GG	CC	AA	TT	GG	CC	CC	GG	GG	CC	AA	GG	AA	GG	CC	CC	TT		AA	AG	AG	CC	GG
PEMB_09	Pembroke Welsh Corgi	26	3.2581	female	CC		AG	CT	CG	CT	TT	CT	AC	CT	CT	GG	CC	GG	AT	GG	AA	GG	GG	GG	GG	AG	GG	CC	AA	GT	GG	CT	CG	AG	GG	CT	AT	CG	AA	AG	CT	CT	AT
PEMB_10	Pembroke Welsh Corgi	26	3.2581	female	CT		AG	TT	CG	CC	TT	CT	AA	CT	CT	CG	CC	CG	AT	GG	AG	GG	GG	GG	GG	AA	GG	CC	AA	GG	GG	TT	GG	AA	GG	TT	TT	CC	AA	AG	TT	TT	AT		AA	AA	AA	CC	GG
PEMB_11	Pembroke Welsh Corgi	26	3.2581	female	CC		AG	TT	GG	CC	TT	CC	AA	CC	TT	GG	CC	GG	AT	GG	AA	GG	GG	GG	GG	AG	GG	CC	AA	GG	GG	TT	GG	AA	GG	CT	AT	CG	AA	AA	TT	TT	AA		AG	AG	AG	CC	GG
PEMB_12	Pembroke Welsh Corgi	26	3.2581	female	CC		GG	TT	CG	CC	TT	CC	AA	CC	TT	GG	CC	GG	AT	GG	AA	GG	GG	GG	GG	AG	GG	CC	AA	GT	GG	CT	CG	AG	GG	CT	AT	CG	AA	AG	CT	CT	AT		AA	AG	AG	CC	GG
PEMB_13	Pembroke Welsh Corgi	26	3.2581	female	CC		AG	TT	GG	CC	TT	CC	AA	CC	TT	GG	CC	GG	AT	GG	AA	GG	GG	GG	GG	AG	GG	CC	AA	GG	GG	TT	GG	AA	GG	CT	AT	CG	AA	AA	TT	TT	AA		AA	AA	AA	CC	GG
SUSX_05	Sussex Spaniel	40	3.68888	female	TT		AA	CC	CC	TT	TT	TT	CC	TT	CC	CC	AA	GG	TT	CC	GG	GG	AA	GG	GG	GG	GG	CC	AA	TT	GG	TT	GG	AA	GG	CC	AA	GG	AA	GG	TT	TT	TT		AA	GG	GG	CC	GG
SUSX_06	Sussex Spaniel	40	3.68888	female	TT		AA	CC	CC	TT	TT	TT	CC	TT	CC	CC	AA	GG	TT	CC	GG	GG	AA	GG	GG	GG	GG	CC	AA	TT	GG	TT	GG	AA	GG	CC	AA	GG	AA	GG		TT	TT		AA	GG	GG	CC	GG
SALU_05	Saluki	43	3.7612	male	CT		AA	TT	CC	CC	TT	TT	AC	CC	CT	GG	CC	GG	AT	GG	AG	GG	GG	GG	AG	AA	GG	CC	AA	GT	GG	TT	GG	AA	GG	TT	TT	CC	AC	AG	CT	CT	AT		AA	AA	AA	CC	GG
SALU_06	Saluki	43	3.7612	male	TT		AA	TT	GG	CC	TT	TT	AA	TT	CC	GG	CC	GG	TT	GG	GG	GG	GG	GG	AA	AA	GG	CC	AA	GG	GG	TT	GG	AA	GG	TT	TT	GG	CC	GG	CC	CC	TT		AA	AG	AG	CC	GG
SALU_07	Saluki	43	3.7612	female	TT		AA	CC	CC	TT	TT	TT	CC	TT	CC	GG	CC	GG	TT	CC	AA	GG	GG	GG	GG	GG	GG	CC	AA	TT	GG	TT	GG	AA	GG	CC	TT	GG	CC	GG	CC	CC	TT
SALU_08	Saluki	43	3.7612	male	CT		GG	CC	CC	CC	TT	TT	CC	TT	CC	CG	AC	GG	TT	CC	AA	AG	GG	GG	AA	GG	AA		GG	TT	AG	CT	CG		AG	CC	AT	GG	CC	AG	CT	CC	TT		AA	AG	AG	CC	GG
SALU_09	Saluki	43	3.7612	male	TT		GG	CC	CC	CC	TT	TT	CC	TT	CC	GG	CC	GG	TT	CC	AA	GG	GG	GG	AA	GG	AA	TT	GG	TT	AA	CC	CC	GG	AA	CC	AA	GG	CC	AA	TT	CC	TT		AA	AG	AG	CC	GG
SALU_10	Saluki	43	3.7612	male	TT		AA	CT	CG	CT	TT	CT	AC	CT	CT	GG	CC	GG	TT	CG		GG	AG		AG	AG	GG	CC	AA	TT	GG	TT	GG	AA	GG	CC	AT	CG	AC	GG	CC	CC	TT		AA	AG	AG	CC	GG
AFGH_05	Afghan Hound	55	4.00733	male	TT		AA	TT	GG	CC	TT	CC	AA	CC	TT	GG	CC	GG	TT	GG	AA	GG	GG	GG	GG	GG	GG		AA	GG	GG	TT	GG		GG	CC	AA	GG	AA	GG	TT	CC	TT		AG	AA	AG	CC	GG
AFGH_06	Afghan Hound	55	4.00733	female	TT		AA	CC	CC	CC	CC	TT	CC	TT	CC	CC	AA	GG	TT	CC	AA	AA	GG	GG	AA	GG	AA	TT		TT	AA	CC	CC	GG	AA	CC	AA	GG	AA	GG		TT	TT		AA	GG	GG	CC	GG
AFGH_07	Afghan Hound	55	4.00733	male	CT		AA	CT	CG	CT	TT	CT	AC	CT	CT	GG	CC	GG	TT	CG	AA	GG	GG	GG	GG	GG	GG	CC	AA	GT	GG	TT	GG	AA	GG	CC	AT	GG	AC	GG	CC	CC	TT		AA	GG	GG	CC	GG
IWSP_07	Irish Water Spaniel	56.5	4.03424	female	TT		AA	TT	CC	CC	TT	TT	AA	TT	CC	CC	CC	CC	TT	GG	GG	GG	GG	GG	GG	AA	GG	CC	AA	GG	GG	TT	GG	AA	GG	CC	AA	GG	AA	GG		TT	TT		AA	AA	AA	CC	GG
IWSP_08	Irish Water Spaniel	56.5	4.03424	male	TT		AA	TT	CC	CC	TT	TT	AA	TT	CC	CC	CC	CC	TT	GG	GG	GG	GG	GG	GG	AA	GG	CC	AA	GG	GG	TT	GG	AA	GG	CC	AA	GG	AA	GG		TT	TT		AA	AA	AA	CC	GG
IWSP_09	Irish Water Spaniel	56.5	4.03424	female	TT		AA	TT	CC	CC	TT	TT	AA	TT	CC	CC	CC	CC	TT	GG	GG	GG	GG	GG	GG	AA	GG	CC	AA	GG	GG	TT	GG	AA	GG	CC	AA	GG	AA	GG		TT	TT		AA	AA	AA	CC	GG
BULD_07	Bulldog	56.9	4.0413	male	TT		AA	TT	CC	CC	TT	TT	AC	CT	CC	CG	CC	CG	TT	GG	GG	GG	GG	GG	AG	AG	GG	CC	AA	GT	GG	CT	CG	AG	GG	CT	AT	CG	AA	GG		TT	TT		AA	AG	AG	CC	GG
BULD_08	Bulldog	56.9	4.0413	male	CC		AA	CC	CC	CC	TT	TT	AA	TT	CC	CC	CC	CC	TT	GG	GG	GG	GG	GG	GG	AA	GG	CC	AA	GG	GG	TT	GG	AA	GG	CC	AA	GG	AA	GG			TT		AA	GG	GG	CC	GG
BULD_09	Bulldog	56.9	4.0413	female	CT		AA	CT	CG	CC	TT	CT	AA	CT	CT	CG	CC	CG	TT	GG	AG	GG	GG	GG	GG	AG	GG	CC	AA	GG	GG	TT	GG	AA	GG	CC	AA	GG	AA	AG	TT	TT	AT
SPOO_11	Poodle (Standard)	57.5	4.05178	male	CT	CC	GG		CG	CC		CT	AC	CC	CT	GG	CC	GG	AT	CG	AA	AG	GG	GG	AG	AG	AG	CT	AG	GT	AG	CT	CG	AG	AG	CT	AT	CC		AG	TT	TT	AT
SPOO_12	Poodle (Standard)	57.5	4.05178	male	CC	CC	GG	CT	CC	CC		TT	AC	CT	CT	CG	CC	CG	TT	CC	AG	GG	AG	GG	GG	AG	GG	CC	AA	GG	GG	TT	GG	AA	GG	CC	AA	GG	CC	GG	CC	CC	TT	TT	AA	AG	GG	CC	GG
SPOO_13	Poodle (Standard)	57.5	4.05178	female	CC	CC	AG		CG	CC		CT	AA	CT	CT	CG	CC	CG	TT	CG	AG	GG	AG	GG	GG	AG	GG	CC	AA	GG	GG	TT	GG	AA	GG	CC	AA	GG		GG	CT	CT	TT	CC	AA	AA	AA	CC
SPOO_14	Poodle (Standard)	57.5	4.05178	female	CC	CC	AG	TT	GG	CC		CC	AA	CC	TT	GG	CC	GG	AT	GG	AA	GG	GG	GG	GG	AG	GG	CC	AA	GG	GG	TT	GG	AA	GG	CT	AT		AA	AG	TT	TT	AT	TT	AA	AA	AG	CC	GG
SPOO_15	Poodle (Standard)	57.5	4.05178	male	CC	CC	GG	CT	CC	CC		TT	CC	CT	CT	CG	AC	GG	TT	CC	AG	GG	AG	GG	GG	GG	GG	CC	AA	GG	GG	TT	GG	AA	GG	CC	AA	GG	AC	AG	CT	CT	AT	CT	AA	AA	AA	CC	GG
SPOO_16	Poodle (Standard)	57.5	4.05178	male	CC	CC	GG	CC	CC	CC		TT	CC	CC	TT	GG	CC	GG	TT	CC	AA	GG	GG	GG	GG	GG	GG	CC	AA	GG	GG	TT	GG	AA	GG	CC	AA	GG	CC	GG	CC	CC	TT	TT	AA	AG	GG	CC	GG
SPOO_17	Poodle (Standard)	57.5	4.05178	female	CC	CC	AG		CG	CC		CT	AC	CC	TT	GG	CC	GG	TT	CG	AA	GG	GG	GG	GG	GG	GG	CC	AA	GG	GG	TT	GG	AA	GG	CC	AA	GG		GG	CT	CT	TT	TT	AA	AG	GG	CC
SPOO_18	Poodle (Standard)	57.5	4.05178	female	CC	CC	GG		CC	CC		CT	AC	CC	TT	GG	CC	GG	TT		AA	GG	GG	GG	GG	GG	GG	CC	AA	GT	GG	CT	CG	AG	GG	CC	AA	GG		GG	CC	CC	TT	CT	AA	AA	AG	CC
SPOO_19	Poodle (Standard)	57.5	4.05178	female	CC	CC	AG	TT	CG	CC		CT	AC	CC	CT	GG	CC	GG	TT	CG	AA	AG	GG	GG	AG	GG	AG	CT	AG	GT	AG	CT	CG	AG	AG	CC	AA	GG	AA	GG	TT	TT	TT	CC	AA	AA	AA	CC	GG
SPOO_20	Poodle (Standard)	57.5	4.05178	female	CT	CC	GG	CC	CC	CC		TT	CC	CT	CT	CG	AC	GG	TT	CC	AA	AG	GG	GG	AG	GG	AG	CT	AG	GT	AG	CT	CG	AG	AG	CC	AA	GG	AC	GG	CC	CT	TT	CT	AA	AA	AG	CC	GG
SPOO_21	Poodle (Standard)	57.5	4.05178	male	CT	CT	AA		GG	CC		CC	AA	CC	TT	GG	CC	GG	TT	GG	AA	GG	GG	GG	GG	GG	GG	CC	AA	GG	GG	TT	GG	AA	GG	CC	AA	GG		AG	TT	TT	AT	CT	AA	AA	AA	CC
SPOO_22	Poodle (Standard)	57.5	4.05178	male	CC	CC	AG	CT	CG	CC		CT	AC	CC	TT	GG	CC	GG	TT	CG	AA	GG	GG	GG	GG	GG	GG	CC	AA	GG	GG	TT	GG	AA	GG	CC	AA	GG	AC	GG	CT	CT	TT	CC	AA	AA	AA	CC	GG
SPOO_23	Poodle (Standard)	57.5	4.05178	female	CC	CC	GG		CG	CC		CT	AC	CC	CT	GG	CC	GG	AT	CG	AA	AG	GG	GG	AG	AG	AG	CT	AG	GT	AG	CT	CG	AG	AG	CT	AT	CC		AG	TT	TT	AT	CT	AA	AG	AG	CC
SPOO_24	Poodle (Standard)	57.5	4.05178	female	CT	CT	AG	TT	GG	CC		CC	AA	CC	TT	GG	CC	GG	AT	GG	AA	GG	GG	GG	AG	AG	GG	CC	AA	GG	AG	CT	CG	AG	AG	CT	AT		AC	AA	TT	TT	AA	TT	AA	AA	AG	CC	GG
SPOO_25	Poodle (Standard)	57.5	4.05178	male	CC	CC	GG		CG	CC		CT	AC	CC	CT	GG	CC	GG	AT	CG	AA	AG	GG	GG	AG	AG	AG	CT	AG	GT	AG	CT	CG	AG	AG	CT	AT	CC		AG	TT	TT	AT
COLL_05	Collie	62.5	4.13517	female	CT	TT	AA	TT	GG	CC	TT	CC	AA	CC	TT	GG	CC	GG	TT	GG	AA	GG	GG	GG	GG	GG	GG	CC	AA	GG	GG	TT	GG	AA	GG	CC	AA	GG	AA	AA	TT	TT	AA		AA			CC	GG
COLL_06	Collie	62.5	4.13517	male	TT	TT	AA	TT	GG	CC	TT	CC	AA	CC	TT	GG	CC	GG	TT	GG	AA	GG	GG	GG	GG	GG	GG	CC	AA	GG	GG	TT	GG	AA	GG	CC	AA	GG	AA	AA	TT	TT	AA		AA	AA	GG	CC	GG
GOLD_05	Golden Retriever	65	4.17439	female	CT		AA	CT	CG	CC	TT	CT	AC	CT	CT	CG	AC	GG	TT	CG	AG	GG	AG	CG	GG	GG	GG	CC	AA	GT	GG	TT	GG	AA	GG	CC	AA	GG	AC	AG	CT	CT	AT		GG	GG	GG	TT	AG
GOLD_06	Golden Retriever	65	4.17439	male	CT		AA	CC	CC	CC	TT	TT	AC	TT	CC	CC	CC	CC	TT	GG	GG	GG	GG	GG	GG	AA	GG	CC	AA	TT	GG	TT	GG	AA	GG	CC	AA	CC	AA	GG	CC	CC	TT		AG	AG	AG		AG
GOLD_07	Golden Retriever	65	4.17439	female	TT		AA	TT	GG	CC	TT	CC	AA	CC	TT	GG	CC	GG	TT	GG	AA	GG	GG	GG	GG	GG	GG	CC	AA	GG	GG	TT	GG	AA	GG	CC	AA	GG	AA	AA	TT	TT	AA		AG	GG	GG	CT	AG
GOLD_08	Golden Retriever	65	4.17439	male	CT		AA	CC	CC	CC	TT	TT		TT	CC	CC	AC	CG	TT		GG	GG	AG	CG	GG	AG	GG		AA	TT	GG	TT	GG		GG	CC	AA	CG		GG	CC	CC	TT		AG	AG	AG	CT	GG
GREY_08	Greyhound	65	4.17439	female	TT		AA	TT	GG	CC	TT	CC	AA	CC	TT	GG	CC	GG	TT	GG	AA	GG	GG	GG	GG	GG	GG	CC	AA	GG	GG	TT	GG	AA	GG	CC	AA	GG	AA	AA	TT	TT	AA		AA	AG	AG	CC	GG
GREY_09	Greyhound	65	4.17439	female	CT		GG	TT	CC	CC	TT	CC	AA	CC	TT	GG	CC	GG	TT	GG	AA	GG	GG	GG	GG	GG	GG	CC	AA	TT	GG	CC	CC	GG	GG	CC	AA	GG	AA	GG	CC	CC	TT		AA	AG	AG	CC	GG
GSNZ_06	Giant Schnauzer	73.5	4.29729	female	TT		AA	TT	CC	CC		TT	AC	TT	CC	CG	CC	CG	TT	CG	AG	GG	GG	GG	AG	AG	GG	CC	AA	GT	GG	CT	CG	AG	GG	CC	AA	GG	AA	GG	TT	CC	TT
GSNZ_07	Giant Schnauzer	73.5	4.29729	male	CT		AG	TT	CG	CC	TT	CT	AC	CC	CT	GG	CC	GG	TT	CG	AA	AG	GG	GG	AG	GG	AG	CT	AG	TT	AG	CC	CC	GG	AG	CC	AA	GG	AA	GG	CC	CT	TT
DOBP_06	Doberman Pinscher	77	4.34381	female	CC		GG	CT	CC	CC	CT	TT	CC	CC	CT	GG	CC	GG	TT	CC	AA	AG	AG	GG	AG	GG	AG	CT	AG	TT	AG	CC	CC	GG	AG	CC	AT	GG	AC	GG	TT	TT	TT		AG	GG	GG	CT	GG
DOBP_07	Doberman Pinscher	77	4.34381	female	CT		GG	CC	CC	CC	CT	TT	CC	CT	CT	GG	CC	GG	TT	CC	AA	GG	AG	GG	AG	AG	GG	CC	AA	TT	GG	CC	CC	GG	GG	CC	AT	CG	CC	GG	TT	CT	TT		AA	AA	AA	CC	GG
DOBP_08	Doberman Pinscher	77	4.34381	female	CC		GG	CT	CC	CC	CT	TT	CC	CT	CC	CG	CC	GG	TT	CC	AA	AG	GG	GG	AG	AG	AG	CT	AG	GT	AG	CT	CG	AG	AG	CC	AA	GG	AA	GG	TT	CT	TT
DOBP_09	Doberman Pinscher	77	4.34381	male	CT		GG	CT	CC	CC	TT	TT	CC	CT	CC	GG	CC	GG	TT	CC	AA	AG	GG	GG	AA	AG	AG	CT	AG	TT	AG	CC	CC	GG	AG	CC	AA	CG	AC	GG		CT	TT
BORZ_09	Borzoi	82.5	4.4128	female	CC	CC	GG	CT	CC	CC	TT	TT	AC	TT	CC	CC	AC	CG	TT		GG	GG	AG	CG	GG	AG	GG	CC	AA	GG	AG	CT	CG	AG	AG	CC	AA	GG	AC	AG	CT	CT	AT	CT	AA	AA	AA	CC	GG
BORZ_10	Borzoi	82.5	4.4128	male	CT	CT	AG	TT	CC	CC	TT	TT	CC	TT	CC	CC	AC	GG	TT		GG	GG	AG	CG	AG	AA	GG	CC	AA	TT	GG	TT	GG	AA	GG	CC	AA	CC	AC	AG	CT	CT	AT	CT	AG	AG	AG	CC	GG
BORZ_12	Borzoi	82.5	4.4128	male	CC	CC	GG	TT	CC	CC	TT	TT	AC	TT	CC	CC	CC	CG	TT		GG	GG	GG	GG	GG	AA	GG	CC	AA	GT	GG	TT	GG	AA	GG	CC	AA	CG	AA	AG	CT	CT	AT	CT	AA	AA	AA	CC	GG
BORZ_13	Borzoi	82.5	4.4128	female	CC	CC	GG	CC	CC	CC	TT	TT	CC	TT	CC	CC	AA	GG	TT		GG	GG	AA	CC	GG	GG	GG	CC	AA	GG	AA	CC	CC	GG	AA	CC	AA	GG	CC	AA	TT	TT	AA	TT	AA	AG	AG	CC	GG
GSD-_07	German Shepherd Dog	85	4.44265	male	CT		AG	TT	CG	CC	TT	CC	AA	CC	TT	GG	CC	GG	AT	GG	AA	GG	GG	GG	GG	AG	GG	CC	AA	GG	GG	TT	GG	AA	GG	CC	AA	GG	AC	GG	CT	CT	TT		AA	AA	AA	CC	GG
GSD-_08	German Shepherd Dog	85	4.44265	female	TT		AA	CT	CC	CT	TT	TT	AC	TT	CC	CC	AC	CG	TT	CG	GG	GG	AG	GG	GG	AG	GG	CC	AA	GT	GG	TT	GG	AA	GG	CC	AA	GG	AA	AA	TT	TT	AT		GG	GG	GG	TT	GG
AKIT_13	Akita	92.5	4.52721	male	CT	CT	AG	TT	CG	CC	TT	TT	AA	CT	CT		CC	CG	TT	CC	GG	GG	AG	GG	GG	AG	GG	CT	AA	GT	GG	TT	GG	AA	GG	CC	AA	GG	AC	GG	TT	CT	TT	CC	AG	AG	AG	CT	AG
AKIT_14	Akita	92.5	4.52721	female	TT	CC	GG	TT	CC	CC	TT	TT	AA	TT	CC	GG	CC	CC	TT		GG	GG	AA	GG	GG	GG	GG	TT	AA	TT	GG	TT	GG	AA	GG	CC	AA	GG	CC	GG	TT	CC	TT	CC	GG	GG	GG	TT	AA
AKIT_15	Akita	92.5	4.52721	female	TT	CT	AG	CT	CC	CC	TT	TT	AC	CT	CT	GG	CC	CC	TT		GG	GG	AG	GG	GG	AG	GG	CT	AA	TT	GG	CT	CG	AG	GG	CC	AA	CG	CC	GG	CT	CC	TT	CC	AG	AG	AG	CT	AG
AKIT_16	Akita	92.5	4.52721	female	TT	CC	GG	TT	CC	CC	TT	TT	AA	TT	CC	GG	CC	CC	TT		GG	GG	AA	GG	GG	GG	GG	TT	AA	TT	GG	TT	GG	AA	GG	CC	AA	GG	CC	GG	TT	CC	TT	CC	GG	AG	AG	CT	AG
AKIT_17	Akita	92.5	4.52721	female	TT	TT	AA	CT	CG	CC	TT	CT	AC	CC	TT	GG	CC	CG	TT		AG	GG	GG	GG	GG	AG	GG	CC	AA	GT	GG	CT	CG	AG	GG	CC	AA	CG	AC	GG	CT	CT	TT	CC	GG	GG	GG	TT	AA
AKIT_18	Akita	92.5	4.52721	female	TT	CC	GG	TT	CC	CC	TT	TT	AA	TT	CC	GG	CC	CC	TT		GG	GG	AA	GG	GG	GG	GG	TT	AA	TT	GG	TT	GG	AA	GG	CC	AA	GG	CC	GG	TT	CC	TT	CC	AG	AG	AG	CT	AG
AKIT_19	Akita	92.5	4.52721	female	TT	CC	GG	TT	CC	CC	TT	TT	AA	TT	CC	GG	CC	CC	TT		GG	GG	AA	GG	GG	GG	GG	TT	AA	TT	GG	TT	GG	AA	GG	CC	AA	GG	CC	GG	TT	CC	TT	CT	AG	GG	GG	CT	AG
AKIT_20	Akita	92.5	4.52721	female	TT	CC	GG	TT	CC	CC	TT	TT	AA	TT	CC	GG	CC	CC	TT		GG	GG	AA	GG	GG	GG	GG	TT	AA	TT	GG	TT	GG	AA	GG	CC	AA	GG	CC	GG	TT	CC	TT	CC	GG	GG	GG	TT	AA
GPYR_09	Great Pyrenees	92.5	4.52721	female	CC	TT	GG	CC	CC	CC	TT	TT	CC	TT	CC	CC	AA	GG	TT	CC	GG	GG	AA	CC	GG	GG	GG	CC	AA	GG	AA	CC	CC	GG	AA	CC	AA	GG	CC	AA	TT	TT	AA	TT	AA	AA	AA	CC	GG
GPYR_12	Great Pyrenees	92.5	4.52721	male	CT	CC	GG	CT	CG	CC	CT	CT	AC	CT	CT	CG	AC	GG	AT	CG	AA	AG	GG	GG	GG	AA	GG	CC	AA	GT	GG	CT	CG	AG	GG	CT	AT	CG	AA	AG	TT	TT	AT	TT	AA	AA	AA	CC	GG
LEON_08	Leonberger	92.5	4.52721	male	CC	TT	AA	TT	CC	CC	TT	TT	CC	CC	CC	GG	CC	GG	TT	GG	GG	GG	GG	GG	AA	AA	GG	TT	AA	TT	GG	TT	GG	AA	GG	CC	AA	GG	AA	GG	TT	CC	TT	TT	AA	GG	GG	CC	GG
LEON_09	Leonberger	92.5	4.52721	male	CC	TT	AA	TT	CC	CC	TT	TT	CC	CC	CC	GG	CC	GG	TT	GG	GG	GG	GG	GG	AA	AA	GG	TT	AA	TT	GG	TT	GG	AA	GG	CC	AA	GG	AA	GG	TT	CC	TT	TT	AA	AG	AG	CC	GG
LEON_10	Leonberger	92.5	4.52721	male	CC	CT	AG	TT	CC	CC	TT	TT	CC	CC	CC	GG	CC	GG	TT		AG	AG	GG	GG	AA	AG	AG	TT	AG	TT	AG	CT	CG	AG	AG	CC	AA	GG	AA	GG	TT	CT	TT	TT	AA	GG	GG	CC	GG
LEON_12	Leonberger	92.5	4.52721	female	CC	CT	AG	TT	CC	CC	TT	TT	CC	CC	CC	GG	CC	GG	TT		AG	AG	GG	GG	AA	AG	AG	TT	AG	TT	AG	CT	CG	AG	AG	CC	AA	GG	AA	GG	TT	CT	TT	TT	AA	AG	AG	CC	GG
LEON_13	Leonberger	92.5	4.52721	female	CC	TT	AA	TT	CC	CC	TT	TT	CC	CC	CC	GG	CC	GG	TT		GG	GG	GG	GG	AA	AA	GG	TT	AA	TT	GG	TT	GG	AA	GG	CC	AA	GG	AA	GG	TT	CC	TT	TT	AA	AG	AG	CC	GG
KUVZ_10	Kuvasz	93.8	4.54116	male	CT	CT	AG	CC	CC	CT	TT	TT	CC	TT	CC	CG	AC	GG	TT		AG	GG	AG	CG	GG	GG	GG	CC	AA	GT	AG	CT	CG	AG	AG	CC	AT	GG	CC	AG	CT	CT	AT	CT	AG	AG	AG	CT	AG
KUVZ_11	Kuvasz	93.8	4.54116	female	CC	CC	GG	CC	CC	CC	TT	TT	CC	TT	CC	CG	AC	GG	TT		AG	AG	AG	CG	AG	GG	AG	CC	AG	GG	AG	CT	CG	AG	AG	CT	AT	CG	AC	AG	TT	CT	AT	CT	AA	AA	AA	CC	GG
ROTT_11	Rottweiler	100	4.60517	male	CC		GG	CC	CC	TT	TT	TT	CC	TT	CC	CC	CC	CC	TT	CC	GG	GG	GG	GG	AA	AA	GG	CC	AA	TT	GG	TT	GG	AA	GG	CC	AA	GG	CC	AA	TT	TT	TT		AA	AG	AG	CC	GG
ROTT_12	Rottweiler	100	4.60517	female	CT		AG	CT	CC	CT	TT	CT	AC	TT	CC	CC	CC	CC	TT	CC	GG	GG	AG	GG	AG	AA	GG	CC	AA	GT	GG	TT	GG	AA	GG	CC	AA	GG	AC	AG	TT	TT	TT		AA	GG	GG	CC	GG
ANAT_07	Anatolian Shepherd Dog	115	4.74493	female	CT	CT	AG	TT	GG	CC	TT	CC	AC	CT	CT	GG	CC	GG	AT		AA	GG	GG	GG	GG	AG	GG	CC	AA	GT	GG	TT	GG	AA	GG	CT	TT	CG	AC	AG	CT	CT	AT	CC	AG	AG	GG	CT	AG
ANAT_08	Anatolian Shepherd Dog	115	4.74493	male	CT	TT	AA	CT	CC	CT	TT	TT	AC	TT	CC	CC	AA	GG	TT		GG	GG	AA	GG	GG	GG	GG	CC	AA	GT	GG	TT	GG	AA	GG	CC	AA	GG	CC	AA	TT	TT	AA	CT	AA	AG	AG	CC	GG
BULM_08	Bullmastiff	115	4.74493	female	TT		AA	TT	CC	CC	TT	TT	CC	TT	CC	GG	CC	GG	TT	CC	AA	GG	GG	GG	AA	GG	GG	CC	AA	TT	GG	CC	CC	GG	GG	CC	AA	GG	AA	GG	TT	CC	TT
BULM_09	Bullmastiff	115	4.74493	female	TT		AA	TT	CC	CC	TT	TT	AC	TT	CC	CG	CC	CG	TT	CG	AG	GG	GG	GG	AG	AG	GG	CC	AA	GT	GG	CT	CG	AG	GG	CT	AT	CG	AA	GG	TT	CC	TT
BULM_10	Bullmastiff	115	4.74493	female	TT		AA	TT	CC	CC	TT	TT	AA	TT	CC	CC	CC	CC	TT	GG	GG	GG	GG	GG	GG	AA	GG	CC	AA	GG	GG	TT	GG	AA	GG	TT	TT	CC	AA	GG	TT		TT		AA	AG	AG	CC	GG
NEWF_09	Newfoundland	125	4.82831	male	CT	CT	AG	TT	CC	CC		CT	AC	CT	CT	CG	AC	GG	TT	CG	AA	GG	AG	CG	GG	GG	GG	CC	AA	GT	GG	CT	CG	AG	GG	CC	AT	GG	AA	GG	CC	CC	TT	CT	AG	GG	GG	CT	AG
NEWF_10	Newfoundland	125	4.82831	female	CT	CT	AG	TT	CG	CC		CC	AA	CT	CT	CG	CC	CG	TT	CG	AG	GG	AG	GG	GG	AG	GG	CC	AA	GT	GG	CT	CG	AG	GG	CC	AA	GG	AA	AG	TT	TT	AT	CT	AG	AG	AG	CT	AG
NEWF_11	Newfoundland	125	4.82831	male	TT	CT	AG	TT	CG	CC		CT	AA	CT	CT	CG	CC	CG	TT	GG	AG	GG	GG	GG	GG	AG	GG	CC		GG	GG	TT	GG	AA	GG	CC	AA	GG	AA	AG	CT	CT	AT	CT	AG	GG	GG	CT	AG
NEWF_12	Newfoundland	125	4.82831	unknown	CC	CT	AG	TT	CC	CC	TT	CT	AC	CT	CT	CG	AC	GG	TT	CG	AA	GG	AG	CG	GG	GG	GG	CC	AA	GT	GG	CT	CG	AG	GG	CC	AT	GG	AA	GG	CC	CC	TT	CT	AG	GG	GG	CT	AG
NEWF_13	Newfoundland	125	4.82831	male	TT	CC	GG	CC	CC	CC	CC	TT	CC	TT	CC	CC	AA	GG	TT	CC	AA	AA	GG	GG	AA	GG	AA	TT	GG	TT	AA	CC	CC	GG	AA	CC	AA	GG	AA	GG	CT	TT	TT	CT	AG	AG	GG	TT	AA
NEWF_14	Newfoundland	125	4.82831	male	CC	CT	AG	CT	CC	CC	TT	CT	AA	CT	CT	CG	CC	CG	TT	GG	AG	GG	GG	GG	GG	AG	GG	CC	AA	GT	GG	CT	CG	AG	GG	CC	AA	GG	AA	GG	CC	CC	TT	CC	GG	GG	GG	TT	AA
NEWF_15	Newfoundland	125	4.82831	female	TT	CC	GG	CC	CC	CC	CC	TT	CC	TT	CC	CC	AA	GG	TT		AA	AA	GG	GG	AA	GG	AA	TT	GG	TT	AA	CC	CC	GG	AA	CC	AA	GG	AA	GG		TT	TT	CC	GG	GG	GG	CT	AG
GSMD_01	Greater Swiss Mountain Dog	132.5	4.88658	male	TT		AA	TT	GG	CC	TT	CC	AA	CC	TT	GG	CC	GG	TT	GG	AA	GG	GG	GG	GG	GG	GG	CC	AA	GG	GG	TT	GG	AA	GG	CC	AA	GG	AA	AA	TT	TT	AA		AG	AG	AG	CC	GG
GSMD_02	Greater Swiss Mountain Dog	132.5	4.88658	female	CT		AG	TT	CG	CC	TT	CC	AA	CT	CT	CG	CC	CG	TT	CG	AG	GG	AG	GG	GG	AG	GG	CC	AA	GG	GG	TT	GG	AA	GG	CT	AT	GG	AA	AA	TT	TT	AA		AA	AA	AA	CC	GG
GSMD_03	Greater Swiss Mountain Dog	132.5	4.88658	male				TT	CG	CC	TT	CT	AA	CC	TT	GG	CC	GG		GG	AA	GG	GG	GG	GG	AG	GG		AA	GG	GG	TT	GG		GG		AT	CG	AA	AA	TT	TT	AA
GSMD_04	Greater Swiss Mountain Dog	132.5	4.88658	female	CC		GG	TT	CG	CC	TT	CC	AA	CT	CT	CG	CC	CG	AT	CG	AG	GG	AG	GG		AA	GG	CC	AA	GG	GG	TT	GG	AA	GG	TT	TT	CG	AA	AA	TT	TT	AA		AG	AG	AG	CC	GG
DANE_08	Great Dane	136	4.91265	female	TT	TT	AA	CC	CC	TT	TT	TT	CC	TT	CC	CC	AA	GG	TT	CC	GG	GG	AA	GG	GG	GG	GG	CC	AA	TT	GG	TT	GG	AA	GG	CC	AA	GG	AA	AA	TT	TT	TT	CT	AG	AG	AG	CT	AG
DANE_09	Great Dane	136	4.91265	male	CC	CC	GG	TT	CG	CC	TT	CC	AA	CT	CT	CG	CC	CG	AT		AG	GG	AG	GG	GG	AA	GG	CC	AA	GG	GG	TT	GG	AA	GG	CT	AT	CG	AC	AG	CT	CT	AT	CT	AG	AG	AG	CC	GG
DANE_10	Great Dane	136	4.91265	male	TT	TT	AA	CC	CC	TT	TT	TT	CC	TT	CC	CC	AA	GG	TT		GG	GG	AA	GG	GG	GG	GG	CC	AA	TT	GG	TT	GG	AA	GG	CC	AA	GG	AA	AA	TT	TT	TT	CT	AA	AA	AA	CC	GG
DANE_11	Great Dane	136	4.91265	female	CT	CT	AG	CT	CC	CT	TT	CT	AC	TT	CC	CC	AC	CG	TT		GG	GG	AA	GG	GG	AG	GG	CC	AA	GT	GG	TT	GG	AA	GG	CC	AA	GG	AC	AG	CT	CT	TT	CC	GG	GG	GG	CT	AG
DANE_12	Great Dane	136	4.91265	female	CT	TT	AA	CT	CG	CT	TT	CT	AC	CT	CT	CG	AC	GG	TT		AG	GG	AG	GG	GG	GG	GG	CC	AA	GT	GG	TT	GG	AA	GG	CC	AA	GG	AA	AA	TT	TT	AT	CT	AG	AG	AG	CC	GG
DANE_13	Great Dane	136	4.91265	male	CT	CT	AG		CC	CT	TT	TT	AC	CT	CT	CG	AC	GG	TT			GG	AG	GG	GG	GG	GG	CC	AA	TT	GG	CT	CG	AG	GG	CC	AA	GG	AA	AG		TT	TT	TT	AA	AA	AA	CC	GG
DANE_14	Great Dane	136	4.91265	female	CT	CT	AG	TT	CC	CC	TT	CT	AA	CT	CT	CG	CC	CG	TT		AG	GG	GG	GG	GG	AG	GG	CC	AA	GT	GG	CT	CG	AG	GG	CC	AA	GG	AA	GG	CC	CC	TT	CT	AG	AG	AG	CT	AG
DANE_15	Great Dane	136	4.91265	male	TT	TT	AA	CT	CC	CT	TT	TT	AC	TT	CC	CC	AC	CG	TT		GG	GG	AG	GG	GG	AG	GG	CC	AA	GT	GG	TT	GG	AA	GG	CT	AT	CG	AA	AG	TT	TT	TT	CC	GG	GG	GG	CC	GG
DANE_16	Great Dane	136	4.91265	female	CT	CT	AG	CT	CC	CT	TT	TT	AC	CT	CT	CG	AC	GG	TT		AG	GG	AG	GG	GG	GG	GG	CC	AA	TT	GG	CT	CG	AG	GG	CC	AA	GG	AA	AG	TT	TT	TT	CT	AG	AG	AG	CC	GG
DANE_17	Great Dane	136	4.91265	female	CT	CT	AG	CT	CC	CT	TT	CT	AC	TT	CC	CC	AC	CG	TT		GG	GG	AA	GG	GG	AG	GG	CC	AA	GT	GG	TT	GG	AA	GG	CC	AA	GG	AC	AG	CT	CT	TT	CC	AG	AG	AG	CT	AG
DANE_18	Great Dane	136	4.91265	male	CT	CT	AG	CT	CC	CT	TT	CT	AC	TT	CC	CC	AC	CG	TT		GG	GG	AA	GG	GG	AG	GG	CC	AA	GT	GG	TT	GG	AA	GG	CC	AA	GG	AC	AG	CT	CT	TT	TT	AA	AA	AA	CC	GG
IWOF_10	Irish Wolfhound	146.9	4.98975	female	CC	CT	AG	CT	CG	CC	TT	CT	AC	CT	CT	CG	AC	GG	TT	CG	AG	GG	AG	CG	AG	AG	GG	CC	AA	TT	GG	CT	CG	AG	GG	CC	AT	GG	AA	GG	TT	CC	TT	TT	AA	AA	AA	CC	GG
IWOF_11	Irish Wolfhound	146.9	4.98975	male	CC	TT	AA	TT	GG	CC	TT	CC	AA	CC	TT	GG	CC	GG	TT	GG	AA	GG	GG	GG	GG	GG	GG	CC	AA	TT	GG	CC	CC	GG	GG	CC	AA	GG	AA	GG	TT	CC	TT	CT	AA	AA	AA	CC	GG
IWOF_12	Irish Wolfhound	146.9	4.98975	female	CT	CT	AG	CT	CG	CC	TT	CT		CT	CT	CG	AC	GG	TT	CG	AG	GG		CG	AG		GG	CC	AA	GT	AG	CT	CG	AG	AG	CC	AT	GG	AC	AG	TT	CT	AT	CT	AA	AA	AA	CC	GG
IWOF_13	Irish Wolfhound	146.9	4.98975	female	CC	TT	AA	TT	GG	CC	TT	CC	AA	CC	TT	GG	CC	GG	TT	GG	AA	GG	GG	GG	GG	GG	GG	CC	AA	TT	GG	CC	CC	GG	GG	CC	AA	GG	AA	GG	TT	CC	TT	TT	AA	AA	AA	CC	GG
IWOF_14	Irish Wolfhound	146.9	4.98975	female	CC	CT	AG	CT	CG	CC	TT	CT	AC	CT	CT	CG	AC	GG	TT	CG	AG	GG	AG	CG	AG	AG	GG	CC	AA	TT	GG	CT	CG	AG	GG	CC	AT	GG	AA	GG	TT	CC	TT	CT	AA	AA	AA	CC	GG
IWOF_15	Irish Wolfhound	146.9	4.98975	unknown	CC	CT	AG	CT	CG	CC	TT	CT	AC	CT	CT	CG	AC	GG	TT	CG	AG	GG	AG	CG	AG	AG	GG	CC	AA	TT	GG	CT	CG	AG	GG	CC	AT	GG	AA	GG	TT	CC	TT	CC	AA	AA	AA	CC	GG
IWOF_16	Irish Wolfhound	146.9	4.98975	female	CC	CT	AG	CT	CG	CC	TT	CT	AC	CT	CT	CG	AC	GG	TT	CG	AG	GG	AG	CG	AG	AG	GG	CC	AA	TT	GG	CT	CG	AG	GG	CC	AT	GG	AA	GG	TT	CC	TT	TT	AA	AA	AA	CC	GG
IWOF_17	Irish Wolfhound	146.9	4.98975	female	CC	TT	AA	TT	GG	CC	TT	CC	AA	CC	TT	GG	CC	GG	TT	GG	AA	GG	GG	GG	GG	GG	GG	CC	AA	TT	GG	CC	CC	GG	GG	CC	AA	GG	AA	GG	TT	CC	TT	CT	AA	AA	AA	CC	GG
IWOF_18	Irish Wolfhound	146.9	4.98975	female	CC	TT	AA	TT	GG	CC	TT	CC	AA	CC	TT	GG	CC	GG	TT		AA	GG	GG	GG	GG	GG	GG	CC	AA	TT	GG	CC	CC	GG	GG	CC	AA	GG	AA	GG	TT	CC	TT	TT	AA	AA	AA	CC	GG
STBD_11	Saint Bernard	155	5.04343	female	TT	TT	AA	TT	CC	CC	TT	TT	CC	TT	CC	CC	CC	CC	TT	GG	GG	GG	GG	GG	GG	AA	GG	CC	AA	GG	GG	TT	GG	AA	GG	TT	TT	CC	CC	GG	CC	CC	TT	CC	GG	GG	GG	CC	GG
STBD_13	Saint Bernard	155	5.04343	female	CT	TT	AA	TT	CC	CC	TT	TT	AC	CT	CT	CG	CC	CG	AT	GG	AG	GG	GG	GG	GG	AA	GG	CC	AA	GG	GG	TT	GG	AA	GG	TT	TT	CC	AC	AG	CT	CT	AT	CC	AA	AA	AA	CC	GG
MAST_13	Mastiff	182.5	5.20675	male	TT	TT	AA	TT	CG	CC	TT	CT	AC	CC	CT	GG	CC	GG	TT	GG	AG	GG	GG	GG	AG	GG	GG	CC	AA	GT	AG	CC	CC	GG	AG	CC	AA	GG	AC	AG	TT	TT	AT	CT	AA	AG	AG	CC	GG
MAST_14	Mastiff	182.5	5.20675	male	CT	TT	AA	TT		CT	TT	CT	AC	CT	CT	CG	CC	CG	TT	CG	AG	GG	GG	GG	AG	AG	GG	CC	AA	GT	AG	CT	CG	AG	AG	CC	AA	GG	CC	AA	TT	TT	AT	CC	AA	AA	AA	CC	GG
MAST_15	Mastiff	182.5	5.20675	female	CT	TT	AA	TT	CC	CC	TT	TT	AC	TT	CC	CC	AC	CG	TT		GG	GG	AG	CG	GG	AG	GG	CC	AA	GG	GG	TT	GG	AA	GG	CT	TT	CG	AA	GG			TT	CT	AA	AA	AA	CC	GG
MAST_16	Mastiff	182.5	5.20675	male	TT	TT	AA	TT	CC	CC	TT	TT	AA	TT	CC	CC	CC	CC	TT		GG	GG	GG	GG	GG	AA	GG	CC	AA	GG	GG	TT	GG	AA	GG	TT	TT	CC	AA	GG			TT	CT	AA	AG	AG	CC	GG
MAST_17	Mastiff	182.5	5.20675	female	TT	TT	AA	TT	CG	CC	TT	CT	AA	CT	CT	CG	CC	CG	TT		AG	GG	GG	GG	GG	AG	GG	CC	AA	GG	AG	CT	CG	AG	AG	CT	AT	CG	AC	AG	TT	TT	AT	CT	AA	AA	AA	CC	GG
		Number of dogs genotyped			225	161	224	202	224	226	182	225	224	226	226	225	226	226	224	156	223	226	225	225	224	225	226	221	224	226	226	223	226	219	226	225	226	223	202	225	212	220	226	155	209	208	209	207	188
		-log10(p-value)			2.18863	4.20301	6.24941	5.97757	24.2849	3.07114	0.736838	22.731	13.9296	18.1383	23.6024	14.6511	8.07717	7.85109	32.9003	6.9393	15.7349	2.59739	9.09237	3.05819	5.28929	7.37274	2.16203	4.60801	2.18442	14.7181	0.850165	4.02849	4.24018	4.57496	0.850165	21.5211	17.1353	16.3329	2.34352	22.2185	3.21453	12.1598	31.4069	2.42957	7.16577	8.66959	9.80272	6.06013	5.42748
[truncated: 33 more columns]
