# Supplementary material for: Derived variants at six genes explain nearly half of size reduction in dog breeds
Source: HighWire-hosted journal article supplement (doi:10.1101/gr.157339.113), 2013-09-11
Supplement: Supplemental_TableS5.xlsx [file Supplemental_TableS5.xlsx]

## Sheet: chr4_67Mb
Supplemental Table 5. Primer sequences and genomic positions for amplicons used for marker discovery at all loci.
Start and end position of the amplicons refer to the CanFam 3.1 dog assembly.
chr4:67Mb
Chromosome	Start position	End position	Forward primer sequence	Reverse primer sequence	Product size (bp)	Strand
chr4	66955703	66956319	ACATTTTGGCAGGTGCTTTT	CAGCCAGTCCAATTCACCTT	617	+
chr4	66962959	66963564	GCCACCCAGACAACTGAGAT	ACCAAATGCTGCAATCACCT	606	+
chr4	66966509	66967131	GGGTTGTGGGCATACTTGAC	GTGATTTCCCCACACTTTGC	623	+
chr4	66971284	66971937	ATCCTGCCTGGCAACTTGTA	TGTCCAGGCCATCTAAAACA	654	+
chr4	66977453	66978166	AGCTGAAGGTGTTTGCTTCA	ATGACCAAATCCCAGAATGC	714	+
chr4	66983841	66984469	AACAGAGTCAGTGCCCATCC	TCAAAACCATGGGAAAAACT	629	+
chr4	66985947	66986610	TCACAAACCCACTCCACAAA	ATCAAAGCAGCGAAGGATGT	664	+
chr4	66987261	66987957	GAAGCGTGCTTATTGCTGTG	GGGATGCAATTAAAGCCATT	697	+
chr4	66991973	66992621	CCAGGGTTGCCTTTCTTACC	CTAGGAGGGGAGGGACAAAG	649	+
chr4	66994569	66995209	GGCATAAATGGAAGCCTCAG	GACCTGGTTGCAAGGGTAAA	641	+
chr4	67006173	67006833	GTCCAGTGGCCTCATTGTTT	TCATCTGGTGATCCCTCTCC	661	+
chr4	67009592	67010251	TGAATTGAAATCCCGGGTAA	CCCATACCCTCCATTTTCCT	660	+
chr4	67017545	67018283	TGTCACTCTGCCAGGTATGG	GCCAAGGTACAAACACATGC	739	+
chr4	67020236	67020915	TCGGGGGCTATATAAAGAAGG	ACCAGCAAAAGCTCACCACT	680	+
chr4	67021005	67021828	AGGCTTCAGCCATGGTTCTT	TTCTTGGATTCGTGGTAGCAT	824	+
chr4	67021726	67022124	TGGTTTTCTCTAAGAGCTACATCATT	AGCTCCCCTTCAAGTGAGAAG	399	-
chr4	67021934	67022431	ATTCTTAGGAGCGTTGGGATT	GCCAGCAAAGTACCAAAATGA	498	-
chr4	67022271	67022685	CCTGGTAACAAGAAGCAGAAGAA	AGGTCTGAGCTAAATGGCAAA	415	-
chr4	67022669	67023063	GATGTGCAGGTCAACTCATCA	TGCTTCTTGTTACCAGGAGTAGTG	395	-
chr4	67023118	67023346	CACTTCAAGCACGGCTATTTT	GAGCCTGTTCCAGTAATGCAG	229	-
chr4	67023326	67023640	AAGAATTGTCTCAAAGACTGTTTAGTG	AAAATAGCCGTGCTTGAAGTG	315	-
chr4	67023504	67023859	CCACCTGATTTTTCGCTTTT	TTTCTTTGGTTTCCCACGAG	356	+
chr4	67023742	67024109	AGCCAAGCTTTAACCAGGAAG	TTTAGAATCCACTCCCCCATC	368	-
chr4	67023939	67024512	CTCTTGTGCCTTGACCAGAAG	AGGCAGTTGCATTGAGCAC	574	-
chr4	67024407	67024966	GGAAAAGTTCTACACTGTGTTTTTGA	GTCTTGGTTTGTTTTCCTTCG	560	-
chr4	67025239	67025549	GGAGCACCAGAATATTTGGAAT	TCCAGAGGGGTTAAAAAGTGAA	311	-
chr4	67029165	67029989	AGAATCTGAGTCTTTTGGCAAC	CCCTGAACACATCAGATGCTTA	825	+
chr4	67032495	67033309	CGTCCTCCCCTCTCTAGCTT	TGATAAATTTCTCCGTTTCTCC	815	+
chr4	67033806	67034709	GCTTCAAGATCACAAGCATCA	AATATCCAAAGGGTAAGCAACA	904	+
chr4	67039978	67040658	GCTCACAGCTGCTCCAAACT	AGATGCTTCCGTGGAGCTTA	681	+
chr4	67040780	67041096	GCTCTCCGTTAAATCAAGCTG	AAGGAGAGAGGTGTTGTTGGT	317	-
chr4	67045966	67046347	CTTGGAAACAATGCTGCTGA	ACATGGACATTGAGGCTTCC	382	-
chr4	67046328	67046943	TCAGCAGCATTGTTTCCAAG	CTGGGCTCATGACCTTTTGT	616	+
chr4	67047973	67048760	GCCTCGGAGGAAGGACTAAA	CATTTCCCATCAGGGATGAA	788	+
chr4	67048915	67049676	TCATTGACCTACGGAATGGTT	TTTTCGACCGTAAATGATGTTG	762	+
chr4	67049756	67050455	TGTGCCCTTTACTCCCTTCT	TAAGCCTCCAGCCCTGTTG	700	+
chr4	67050576	67051217	GACAGTGTTTCCCCCTGAGA	CTTCCCAGGTGTGAGAGAGG	642	+
chr4	67052653	67053251	CTCTCATGCACACCCATGTACT	GAAACGGTTCTTCTTTACCACTG	599	+
chr4	67055196	67055821	GTTTCGGGACATGGATAGGA	TTGGTAGGCTTGTTGCACAG	626	+
chr4	67058348	67058959	GTTTGAGAGGGTGTGGGAAA	AAGCAGACATTGGGAATTGG	612	+
chr4	67059964	67060599	CCTCATGCTGGGAGGAAAAT	CAGCACCCATCAAGGACAT	636	+
chr4	67070769	67071383	AAGGCCCTACCAAATTTCCA	CTGCAACATCTCATCCCAGA	615	+
chr4	67072612	67073244	AATGAAGCAAGAGGCTGAGG	GACAGTTGATTATGGCCCTTT	633	+
chr4	67075509	67076127	TCTTCCTTACAATTCTGCATCA	TTGTTAAACTATTGGGGGCATT	619	+
chr4	67076603	67077215	GGGACATAGTGCTGAGGTTG	ATGATGGGATGCCAGAGAAG	613	+
chr4	67080835	67081451	GGGAAGAGAGGGAAAACCAG	CAACCAGACCGGGAATTATG	617	+
chr4	67082010	67082703	TGTGTGCTGGGTTCATTTGT	GAAGGCTTGCCTTTTACACG	694	+
chr4	67085774	67086404	TGCAGCCCTTTATCTCCAAG	GGGAGAAGCTGTCAAACCAG	631	+
chr4	67089892	67090494	CAGAAGCTGGTGTGGACTCA	TGCTTAGGCCAGTATTGGTG	603	+
chr4	67092682	67093296	AAGAAATGAGCAGGCAAGGA	TCTCCTCATGATGGGTTTCC	615	+
chr4	67094295	67094994	GGAGTTACTGCAAGCCCAAG	CTAAGCAGAGGGCCTTGTTG	700	+
chr4	67096661	67097043	TCTAGGAAGGCGTTTTTCCA	TGGACAAGATCACTGGTGACA	383	-
chr4	67096857	67097498	AAATGTGACCTGGCTCAACC	AAAGCATCAGCGGTTTCACT	642	+
chr4	67101165	67101849	CCGCAGACATTCTGGAAGTT	CTGGCCTGTGAGAAAAGGAG	685	+
chr4	67108612	67109290	CCTGCTTGTTTCTGCATCTG	TGATTGCAAGGATGCTGTCT	679	+
chr4	67110173	67110819	GGGGCAGAACAGAGCAGATA	TCCACTGAAGGAGTGAAGCA	647	+
chr4	67114835	67115444	GGCAAGGGTTATGAAAAGCA	CAGAGTGGGAATTGCACCTT	610	+
chr4	67116193	67116859	TCCATGTGTGGCAAATCACT	GTCCCCCATTTCTGCCTATT	667	+
chr4	67120888	67121523	ACCCAGAGGCTGAAAGAACA	TCTGCCCACAGGAACTTCTC	636	+
chr4	67126780	67127410	TGTGGTGGGGTTCTAAGAGG	CAAGGTTGTCAAGGGCATTT	631	+
chr4	67135851	67136499	TGATGCCCCTTCATCATTTT	CCCTAACCAGGCCTATCCTC	649	+
chr4	67140217	67140867	CCCTGACTCAAGGCATCATT	ACCAGAGGGTCAGGGAAAGT	651	+
chr4	67145881	67146509	TCCCTCTGGTAACCTGTCCA	CATCCTCATGGCAGAGAGGT	629	+
chr4	67147164	67147855	GCTGAAGACAATCCGTTCAA	TTCTGTAACATGGGCTGCAC	692	+
chr4	67149394	67150089	AGTGCTGAGCCAGGATGAAT	GCTAACTTGCCAAGGCACTC	696	+
chr4	67151551	67152207	CACACCATTAGATGGGATCACT	ATGGGCATCTCTTCCTGAGA	657	+
chr4	67154478	67155168	AGGTTCAGTACCAGCCAAGG	TTCCTGGAAAGCTCTGATCG	691	+
chr4	67155643	67156531	TAGAGTGGCCAACATCACCA	AATTCTGACCTGGGACTCCTC	889	+
chr4	67156811	67157579	ATGCTTAAAGCTGAAGGTCAGT	CCCGGGTTTGGCTGTA	769	+
chr4	67157646	67158489	TCCATCATGTCAACCTCCTTC	TGCAGAGACAGAACCACCAG	844	+
chr4	67162695	67163506	GTCCCACCCCTTTATAAGCA	TTGTATGTGATTGCAGGTCCTA	812	+
chr4	67163291	67163764	GCTATTGTCCAGGGTGTGAAA	TTTGCAGCTACTTAAAACTTACCTC	474	-
chr4	67163535	67164210	CAGACCATCATCACTGCATACT	TTGCAAGGCTGTGAACTGAC	676	+
chr4	67164241	67164940	TAGACCCCTTCCGTTTGATG	AGGCCCCAAGCTCAGATTAC	700	+
chr4	67165129	67165908	TCTCCCTTGGTCTTTCTGGA	TTTGTGCATTGGCACTTTGT	780	+
chr4	67165943	67166661	CCAGATGTGAGCAGGAGAGA	GCTTCCTTTTTCCCCCAATA	719	+
chr4	67167204	67167928	TCACTGGAAGATTTGGGATTG	TTGGTATTTTGCCTTAACAGGA	725	+
chr4	67170132	67170963	TTCCTGGGTAGCCACAACAT	AAAAGAGCCGCTTGTGAAAA	832	+
chr4	67171721	67172390	AGTTGACCAGGAGCCACATT	TCGCATGATCTCGAAGAGTG	670	+
chr4	67175981	67176644	CGACTTGGTGATGCTCTCCT	TTCCTGAGTTATGCCGTGGT	664	+
chr4	67177562	67178269	CGTCACAAGACGATGGACTG	GGGAAATAAGCAAAGGGAAAA	708	+
chr4	67179157	67179783	CCTTCCATTCCTGTCTTCCA	GGCCAGTACTTTGAAGCAAAA	627	+
chr4	67182172	67182798	GTCACAAGTCCGCAAAAGGT	AGCCAGGCATCTTCTGAGTC	627	+
chr4	67192337	67193007	AAACTCTGATTTGGGGCACA	CTGGTCAATTCTGTGGGAAA	671	+
chr4	67193192	67193865	CAGCTCCAAATGAGTTGCAT	GGCAGGTTTCAGATCCACAG	674	+
chr4	67194001	67194658	TCACCTTTGGGACTCAGACA	GGGCCAATCCATATGACAAA	658	+
chr4	67194794	67195434	GTTGTCCTTGGCCACCATAC	ACCCCACCCACTACTCTCAA	641	+
chr4	67195616	67196272	TTCAACAGATTGCTGGAAACA	CGTTGCTGGGAAAACCTGT	657	+
chr4	67199146	67199801	CCAATGGACAGATCGGGTAT	TGCTGTTATTTGGAACCAAGC	656	+
chr4	67200744	67201366	AAATCCCCATCGAAGGAAAA	GAGGTGGCAAGAGACAGCTAA	623	+

## Sheet: chr10_8Mb
Supplemental Table 5. Primer sequences and genomic positions for amplicons used for marker discovery at all loci.
Start and end position of the amplicons refer to the CanFam 3.1 dog assembly.
chr10:8Mb
Chromosome	Start position	End position	Forward primer sequence	Reverse primer sequence	Size	Strand	Notes
chr10	7866673	7867309	GCAGGAATGCTGAAGAGGAG	AAGGCTGTGACAAGCAGGAT	637	+
chr10	7884281	7884803	CAGATGGTCTAGGCTGCACA	TATGCCCTGCTAAGGGACAA	523	+
chr10	7905238	7905739	AGAACTCAGTGCGTGCATCA	CCAACCTGGAGTCATGTGTG	502	+
chr10	7913994	7914524	GCTGACTTTGCACTGTTTGG	TCCCCATGGGAAGTACAGAG	531	+
chr10	7921086	7921616	CGTTTCACCCCATTCTCAAT	GTGTAGGCATGGCTTCCATT	531	+
chr10	7937645	7938149	TTCTGTAAAGTGTGGAGGCTGA	GCTTTACCTGCGTTTTGACC	505	+
chr10	7946052	7946605	TGAGATCCTGAGCCAAAGGT	GGCTGACTCCTCTCTGCTGT	554	+
chr10	7961390	7961919	TCAGAAACAGGAAAGCTGTGG	ATGGGCAAAACTCCAACATT	530	+
chr10	7989962	7990523	GCTGCTCTGTCTGGCTTCAT	AGCGAAGGTACAAAGGTTGC	562	+
chr10	7995901	7996428	CAGTCCAATTTCCTGTTTTGC	GAAAACCTGATGGGACAAGC	528	+
chr10	8004078	8004615	TCGGGGCTCTGATATAATGG	TGGATCGGAGAGGATACCAG	538	+
chr10	8015305	8015895	TTCACTGTTGGTCTGGCTTG	TCCCTTTGAGGAGGCAGATA	591	+
chr10	8020890	8021481	TCTGTGGAAATGGTGTTGGA	CAAACCCCCAAACAAAAATG	592	+
chr10	8032767	8033357	CCTTCAATCTGCCTGCCTTA	TGGGGCTTTACCAAAAACTG	591	+
chr10	8060554	8061059	GCCAGCTTTGTTGGAGGTAG	TCCTACTGCTGCCTTTTTGG	506	+
chr10	8066574	8067085	GTTTCCTCAGGCGTTGTGAT	CGTTACGGACCAGACCTTTC	512	+
chr10	8070796	8071301	CACGTCCCCGTCAGTTTTAT	CCCCATGTCTGGGATTTATG	506	+
chr10	8081521	8082022	GGTCCTCTTCTCCGTGTGAT	GACAGGTAAGGGCAGTTGGA	502	+
chr10	8099959	8100473	TAACCCCAGACCGGGATATT	ACCCTGTTTCACACCGTTTC	515	+
chr10	8105956	8106456	TGCCCGAATCCCAGTAGTAG	ATGGCAAAGCTGGAGAGAAA	501	+
chr10	8123859	8124852	AGGCTCTGTGGTAGGCCTTT	GTGTTCTCAGGGCACCCATA	994	+
chr10	8127920	8128767	TGTGTGCCCTGTGAGAGAAA	GCACGATACCTCATAGCTGAAA	848	+
chr10	8129860	8130529	GAAAGAAAGAAGGAAGGAAGGAA	GTTGCCAGGTAAGCTTGAGG	670	+
chr10	8132046	8132703	CCAGGCTCTGGATCTGATTT	TCTTGTTAAAGGCAAGCGAGT	658	+
chr10	8136755	8137575	TTTCTGACCTTGGGTTCTGG	GAAAGCGGGAGGCATATTTA	821	+
chr10	8139002	8139655	GGCGAGAGAGGGAGTAGTGA	CAACCGTTTGGAACTAGGTAGC	654	+
chr10	8150621	8151411	GTCGATGTTGCTCCTTAGCC	TACTCCGCTTCTGTCCGTCT	791	+
chr10	8157737	8158337	AATGCTCATGCATAGTGGAAG	TACCTTATCACCCCCAAAACC	601	+
chr10	8176065	8176712	GGGCCTTCCAAGGGATTTA	TTAGCTCTCATAAAACGATCTTCC	648	+
chr10	8183425	8184021	TACCCTCGACCCTCACATTC	TGTCATAACATCCTTCACATACACTT	597	+
chr10	8205007	8205601	GCTGTACAAATAGATAGCCTTTCAGAC	TGAACGTAAGCAGTCAGGATCT	595	+
chr10	8208369	8208959	TCAGGACAAATGCACATCGT	TCTGAGCACATGAACCATGAA	591	+
chr10	8219854	8220550	AGGCAACTGGCATTAACAGC	GATGGGATGTTTGCAGGAGT	697	+
chr10	8230522	8231121	AGACCAGTTCCAAAATTCACTTA	ACGTGAGGTAAAAGCGAAAG	600	+
chr10	8239655	8240394	TTGTTCTTGACTCAGCATAGCTT	TCTTAGTGCCCCAACCAGAG	740	+
chr10	8250004	8250637	GCCACCCTCTCTACACTTGC	TCCAGATCGTGTCTGTGGTC	634	+
chr10	8253003	8253623	TCTCTCTCTGTTTTCCCAAACTTC	CCTCTGTTGACCATCCACACT	621	+
chr10	8257888	8258548	GCTGTCTTCTTACAATCATCTTCA	TGAAAGTTCCAAGGGAGTGC	661	+
chr10	8259804	8260404	GCATATACAGATGTCTGATTTCCA	TCTTGGTTTGGCTCTCCTTC	601	+
chr10	8262793	8263452	TGGGATGTGATGGCAATAGA	GTTTTGACAACGGGGAGAAA	660	+
chr10	8266849	8267466	TGCTTTCTTCCCGAGCTAGT	CCTGCAACCAGAGGAAATGT	618	+
chr10	8270106	8270733	AAAGTCTGTCCATGCCCATC	CCCAGGACAGAGCTGAAGTC	628	+
chr10	8276515	8277118	CCCAAGTGGTCTGTCCCTAA	GAGCTGCATGTAAGGTGTTTGA	604	+
chr10	8280010	8280610	AGTCCCGGACGGCTATTATT	TTGTCCTCTCAGCTCAGCAC	601	+
chr10	8283522	8284152	CATGAAACATGATCCCGACA	TCCTGTTGGCAAGCTACAGA	631	+
chr10	8289793	8290329	AATCAGAAGCCCCCAACTCT	GGATAGGGTCATGGCTCAAA	537	+
chr10	8297916	8298437	CATGATGCCAGAGGAGAAGAG	AAATGGGCAAAGCAGTCATT	522	+
chr10	8300102	8300701	CAGCGTTTTCAGTGGCAATA	CCCTCTACCTGAAGCAATGG	600	+
chr10	8306290	8306980	GTTTATTCCCAGACGCCAGA	TCGGTCCCTTTTCTTGTTTG	691	+
chr10	8313125	8313791	TACCCCCTGGGAAATACTCC	AGCCCACACCATAAATGCTT	667	+
chr10	8315106	8315758	AGAGGTCCCTGGTGAAGGAT	ATTCCCAAAGGGGCTGTAAG	653	+
chr10	8318255	8318870	GAGGAAGGGAAGGACAAAGG	GCTCCCACTTCTCTGGACAC	616	+
chr10	8325461	8326106	AAAGTTGTGGAGCAAATTCCA	GCCAGGAGATGTTGGTGTCT	646	+
chr10	8327321	8328019	CCTGGTTGCCACTTTATGGT	AACCTCCACCTGTTTACTTTGTC	699	+
chr10	8331482	8332128	GCACCTTGGGTGGAGATTTA	GATGGGTCTACGAGGAGCAA	647	+
chr10	8333369	8333972	TAGGCTAGGACTGCACCACA	TCCCACTTTCTTCCCATTTG	604	+
chr10	8347096	8347551	AGCGCGACTGGGAGCACATTT	CCGAATACAGACCACCGTGGAA	456	+	KOD Taq polymerase
chr10	8347405	8347887	AAATGGCAACGCGGACCAATC	CCCACCTCTCCCTGCGCTTTA	483	+	KOD Taq polymerase
chr10	8347827	8348348	TGGCAGAGAGGGAGTTCGTAGGG	TTCGGGGCTTGGCCTTTACCT	522	+	KOD Taq polymerase
chr10	8348210	8348636	GGTCGTGCGCTGTGTGATGAG	GGGAGGGAGTGCCCACCTCTA	427	+	KOD Taq polymerase
chr10	8348442	8348969	AGCACGTGAGCGGGGCTTC	GCGCGTAGGGCAGTCAGAAGG	528	+	KOD Taq polymerase
chr10	8348695	8348958	CACACACACACACTCACTCACA	AGTCAGAAGGCAAGAGGAGGA	264	+	KOD Taq polymerase / M13-tag
chr10	8350304	8350798	AAGCAGCGCCCGAGAGTGA	CAAGCAAACGTTGCTCGATCTCC	495	+	KOD Taq polymerase
chr10	8351455	8352011	CCTTCCCAGACACTTCCATTCTGC	GGCTGACAAGGCTGCAGGTTC	557	+	KOD Taq polymerase
chr10	8352065	8352565	AATTTCCTTTTGGAATCCTTGG	GGAAGCATCTTCATTAAGCTTTG	501	+
chr10	8352164	8352512	CCAACAGTTCTTTTGAGCAGCACATGCAGA	TCGCTCAGACACAGCAGAGGTAGGA	349	+	KOD Taq polymerase
chr10	8352329	8352995	CAAGAGTCCCTCCAAAGCAG	TTCTCACCCCATTTTAGAGCA	667	+
chr10	8356123	8356752	TGACTAATGCCAAGCACAGG	GCTGGGTCAGTCAAAGCAAT	630	+
chr10	8359413	8360108	CAACCCTCGTGAACTTGCTT	CTTGCTCCTTGGTCTTCAGG	696	+
chr10	8359867	8360264	AAGCCAGTGTTTTCCTCTGTG	TCAGAGAAAGCAAATCTCTCAGG	398	+
chr10	8361919	8362602	TTCAAAGGGCAAAAACCAAC	TTCTCCACGAAGGCTCATCT	684	+
chr10	8362504	8363053	TGAGGGTGAGAGATGGGTAGAT	GAGTCACTCCCAGGAAAGAAAA	550	+
chr10	8363880	8364064	TGTCTTTGCTACTCTGCTGGA	TCATCTCCATTTCCTTGTGCT	185	+
chr10	8366220	8366906	TGTGAGGCATCCACCATAAA	CCAAAGCAAGACTGATGCAA	687	+
chr10	8366222	8366697	TGAGGCATCCACCATAAAAAC	TCAGAAGAATAAAGGGGGAGAA	476	+
chr10	8373156	8373774	TTTTGGAGGCATTTTGAAGC	AGCACAGAGATGGTCACACG	619	+
chr10	8375930	8376229	TGAAAAATTCACACTTTTATTTTGAGA	AACACACGAGAAGGACTGAAGA	300	+
chr10	8377101	8377722	TTGTGTGCAGAGAGGGTGAG	AAAACCAAGCCAAACTGACG	622	+
chr10	8377835	8378185	CAGTGATCCAGCTGTCCATTT	TGGATTTTAATTGGGGAACCT	351	+
chr10	8382065	8382664	GGGAATGGATGTCGTGTCTTT	AAAGGTCAAGAACTGTAGTCAGTCA	600	+
chr10	8382245	8382872	GTGCTCAGTGGTGGCCTATT	TTCTTGCGGCACTTTATCCT	628	+
chr10	8386144	8386768	GGGTTGTGCCTATTTTGGAG	CTGTTGGAGGTTGTGTGGTG	625	+
chr10	8388053	8388664	CAGTAGTCGCAACCTCCACA	GCTGCTAGGTGGCATTCTTC	612	+
chr10	8390140	8390818	ATCCCCTGGGTTCTGAAAAA	TGCCTCAGTGGCCTAGACTT	679	+
chr10	8392018	8392681	GTCTTGGCTGCATTTGAACA	GGAACCCTGAGCAAGAATGA	664	+
chr10	8396321	8396942	ACCGATGACCACCTAACTGC	GAATGGTAGCCGCTGAAGAC	622	+
chr10	8400291	8400922	TGCAAAGAATCCCTTATCTGAA	TCACTGTAAGCTGTGAATGCAA	632	+
chr10	8403328	8403983	TTCCAGCACCTATCCAGCTT	ACTCGCGGCTTAGTTGAAAA	656	+
chr10	8409321	8409950	CTTTTGCTGGTGACTTGCTG	GAGGTGTCCTGCCTTGAAAT	630	+
chr10	8412125	8412726	GGAGCACTACAAGCCCGATA	TCATTCACCATTCTACAAAACCA	602	+
chr10	8416225	8416919	ACCATGCAAGGCAACTTTTC	GTCCTGTTGCGAGGCTAAGT	695	+
chr10	8418543	8419238	CTCCCTTTTGGTGCACAGAT	AGTCATCAGGAAGGCACTGG	696	+
chr10	8418763	8419424	AAAGGTTCCCGTTTGTTGTG	AGCATTCAACAGCCTCGTCT	662	+
chr10	8420051	8420389	CAAAAGAAATGTTTCAAGGAAGTC	GCTTTGTGACCCCTCTGGTA	339	+
chr10	8426503	8427117	ATTTGGAACTGGTGGCTTTG	GAAGCCCGTATCTCACCAAC	615	+
chr10	8429368	8429695	CAGCCAGAGCCTTACCAAAG	GCTATCACCAGAGGCACTGA	328	+
chr10	8431743	8432382	GGCATATCTCACACGCACAT	AAGCAAAACACACCCTCTGC	640	+
chr10	8435441	8436063	GCTCTAAGGAAAGCTGTGTGATG	AATGTGGTAAGGACGGCAAC	623	+
chr10	8439965	8440597	AGATCGGGGTCTGAGGAAAT	GCAGTCCCTGGTTTGTGTTT	633	+
chr10	8443823	8444521	ACTGATGTGCCCCAAAGAAG	GCATGACAGGAGGGTAGGAA	699	+
chr10	8451392	8451992	GTGGCACAATTTGGCTTCA	GCCTGGAACTACACCCAGAA	601	+
chr10	8456519	8457153	ATGAACTCGGCATCACACAA	TCCAGTCACACACAGGGAAA	635	+
chr10	8470814	8471473	CACGGTTCCCCTCTGATTTA	TTCTTGTGCCTCTTGTGTGC	660	+
chr10	8475893	8476491	GGTGTCCCAGAAGATTTCCA	CCACTTTCTTCCTTCTGTTTCTTC	599	+
chr10	8478682	8479205	TGCTAACAAATTAGACCCTTCC	GCTTTGTACACTTCAAGCTTTGG	524	+
chr10	8482744	8483353	GCCCTGGGATAAGAACAACA	TGTGGGACACACTTGAGGTC	610	+
chr10	8489734	8490332	GTGTGTGTGCACGGATGC	TGGAATTTGCTGGGAGTTTC	599	+
chr10	8490981	8491653	TTGGTGAGTAAGCTCACATTGG	TCCTGCTTATCAGGTCAACAAA	673	+
chr10	8491565	8492195	CACAGGGGACACAGTTTAACAA	CTAAACCCGGATGAGTGTTTTC	631	+
chr10	8491997	8492622	TTTCTAAATGAGACTAAATGCTGATG	GTGCAGTTTGAATGAAGAGACG	626	+
chr10	8492342	8492999	GAATTAGGTGAGAGGAGCGAAA	TTTGTGTGCTGTGTAGTGTGGA	658	+
chr10	8492818	8493487	TCCTTACTGTGTTTCAGCATGG	GCACACTCACTAGGAGAGAAAGC	670	+
chr10	8493276	8493958	AAGCTTTGTAGGTGTGATGCAA	AATGAGGTATACTGGGGCGTAA	683	+
chr10	8493591	8494281	ATCTCTCTTCCAGCCACTTCAG	ATTTTCAACAAGCAAGCGATTC	691	+
chr10	8494065	8494725	TGTTCTTTGCTGTTGTTGGTCT	CTGCAAATGTCACTTGAATGGT	661	+
chr10	8494399	8495004	TGGTCAAAACAGGTCATGGA	CAATAAATTCCCCGACAGGA	606	+
chr10	8509581	8510182	CTCAACTTCCCCAGTCCAAG	ACTCAACCTCACGCTCCTGT	602	+
chr10	8520713	8521497	AACCTCACAGTGTTAATTCTGACG	GGGACAAGCCAGTGTAGGAA	785	+
chr10	8521800	8522688	CATGATTTTGGGAGTTCTGGA	GCTTGGTTCTGCAATCCTGT	889	+
chr10	8523101	8523985	TGTTAGCATGAATCCCCTCCT	TTGAGAAACACAGGCCTAACC	885	+
chr10	8532470	8533166	CCAGTAAAGCTGTTCCCACAA	TGATGAAAGAGTTCTGTCCAAA	697	+
chr10	8535040	8535686	CCTTTTTGGTGGTGAGCAA	TTTGTAGGCATGTCAATTGGT	647	+
chr10	8537257	8538010	CCAATAGATCGTTCCGCACT	TCCAGGGAATTGACCTGATG	754	+
chr10	8538268	8538892	CTCGTCTGCTTTGGGGTTAG	CCTTCATTGGCATAAATGACTC	625	+
chr10	8546839	8547658	TCATTGTTGCCATCACCATC	GCAGGAACCATCTGGAAATC	820	+
chr10	8548146	8548814	AGTTGGATGTCAAACAATAGGG	GTCCCCAAACACTGGAAGAA	669	+
chr10	8550913	8551774	CCACCCCAACTGCAGAGT	GGCAGCCTCTCTGGGAAG	862	+
chr10	8555319	8556053	AAGAATGTCACAAAAAGCATCC	ACTACTTTCTGTTGGGGACACA	735	+
chr10	8564020	8564735	GACTTTTGGCCTTTCCTTCC	GCAGACTTGTCTCTCTTCACCA	716	+
chr10	8567261	8567996	AAGTCTGCAGGCATCTGCTC	TCACCACAAAACTTCAAACACA	736	+
chr10	8571045	8571730	TTTGCTTGTAGGGTGAAAGC	AGCTTCGACCTCGTCACAC	686	+
chr10	8571812	8572480	ACAAACACCAAGATGCACCA	TTTGTTAGGCCAAAGACTCG	669	+
chr10	8574097	8574982	TGGGTTTTCTAGTTCTTGAGCA	TATTTTCACCCCGTCCCAAA	886	+
chr10	8575515	8576384	TTTCTTGGATGTCAAGATTTCG	CCTGTTTGTTTGCCTTCTCA	870	+
chr10	8580867	8581516	TCGTAGATGAAGACAGAGGTCA	TCTTGGAAGAGCGAAAGGTC	650	+
chr10	8582281	8582927	TGCAGCTGGCCATGATCTA	TGGGTTCCACACTTCAACAA	647	+
chr10	8586445	8587198	TCAAATTGGGAGGTTCAGGA	CCTTGTCATTGGTGGCAATA	754	+
chr10	8587985	8588730	CAAATGCCCTCATCTCAAGG	TTCATCCTTCCCACTCCTTTT	746	+
chr10	8590734	8591397	TGCAAGGAACACAACACAAAA	CGCATTCAACATTGTAAGGTAA	664	+
chr10	8591780	8592528	TGTTGAGGAAATGGTAAACAGG	CCCTGAGGAAAACAGAGTCAA	749	+
chr10	8594615	8595271	AAAAAGGCACTATCACCTCAAA	ATCCATGGTCCTGTGTGGTT	657	+
chr10	8595677	8596299	CTTTGCCCATCCTCATCCTA	GCCATATTTAACCAGAAGCCTA	623	+
chr10	8601069	8601767	AACATCGTTAGCTCCCCTGT	TGGAGTCTGGGGAATATCCA	699	+
chr10	8,348,317*	8,350,062*	TGTGGAGGAGCAGGTAAAGG	CGCTTGGCGGGAGAAT	1672#	+	KOD Taq polymerase - filling gap
			internal sequencing primers :	CACACACACACACTCACTCACA
				TCTCGCTCTCTCGCTCTCTC
				GTTGTCCCTGCGCTGAAGT
				GCGCACAATAGCGAAAGTC
				GGCAGCCGTCCACTTCA
chr10	KC529659, position1289	8350550	GGCAGCCGTCCACTTCA	GACTCGCAGCGAACAAAAC	931#	+	KOD Taq polymerase
			internal sequencing primers :	GCGCACAATAGCGAAAGTC
				GCGTTTAAAGAGCCCGAAG
	* : current ucsc coordinates (cf3.1)
	# : observed amplicon length
	Primers in bold were used as internal primers to sequence the initial PCR product.

## Sheet: chr4_39-41Mb
Supplemental Table 5. Primer sequences and genomic positions for amplicons used for marker discovery at all loci.
Start and end position of the amplicons refer to the CanFam 3.1 dog assembly.
chr4:39-41Mb
Chromosome	Start position	End position	Forward primer sequence	Reverse primer sequence	Product size (bp)	Strand	Notes
chr4	39134094	39134691	CATAGCTGGTACCCCAAGGA	TGCTGCTAGCCCGTAATTCT	598	+
chr4	39142108	39142682	TGGCTTTGCCCATCTTATTC	CAGCTGTGGGGGTAGTGATT	575	+
chr4	39149576	39150255	TCTCATCAGCCACAATCTGC	CAAACAAACAGGGGCATTCT	680	+
chr4	39150033	39150446	AGTAGACTCACAATGTCAGCATCCAGCA	CCCATGCCCAGGATTACAATAACCATTA	414	+	M13-tag
chr4	39150269	39150676	TTCAAGGGTCTACAGGAGAGTGTTTTTCA	CTTCCCAGGGTCCTGGTAGCACTC	408	+	M13-tag
chr4	39151428	39152001	CGTAAAGTTGCCTTTCAAGCTC	AAATAAAAGCGAATCCCAGCTC	574	+
chr4	39151726	39152225	CCTAAATGCAAAGCGTCACA	AGGAGTCGAGCAGGTGTTGT	500	+
chr4	39152232	39152896	AAGTGACACCAGAGCTTCCAGGGATATT	AACAAGTCCTACCCCAGCCATTTCATC	665	+	M13-tag
chr4	39152457	39153151	ACACAAAGAATCCAGGTCTCC	GCAATCGGTCTCGCTTACA	695	+	M13-tag
chr4	39153869	39154509	CGTGCAGGAGAGAGGCTATT	CCTACGTTTACAAAAATCACAATCA	641	+	M13-tag
chr4	39154163	39154810	AGGCGCTGCCTTAATAGGAATTTTGTTT	TTGTTCTCGAAACATTCAAACACACCAC	648	+	M13-tag
chr4	39154584	39155046	TCTTGCCCTGGCTTTTTAGAT	GGAGAGACTGGTATCCTGCTGT	463	+
chr4	39154982	39155625	CTTCGTGGCATGTTTTAGCA	GAACCACAGGATGGCTTGTT	644	+
chr4	39155363	39156057	GACACAAACTTCATAGAAACACATCA	CGCCCTGAGAAACACATCTT	695	+	M13-tag
chr4	39155916	39156606	GCAGGAGGGGAAACAGAAAC	TGGCAACCCCATTAGATTGT	691	+	M13-tag
chr4	39156159	39156841	GAAGCATCCCTCTCAAGCTG	CCCCAACCCATACTCATGTC	683	+
chr4	39157001	39157699	CCAGATTCCCCTCATGTTCC	CTGAGATAGACCGGAGACCAG	699	+	M13-tag
chr4	39157152	39157851	ATCCTTTTTGCCCAGATGC	TGAAGTGTATTTCTGAATCCTACACA	700	+
chr4	39157630	39158319	CACTGCACAGGCTGGTGTT	CGAATTTCCCCACTTTAGCA	690	+	M13-tag
chr4	39158300	39158841	TGCTAAAGTGGGGAAATTCG	AGCTGCCTGCAGAGATTCAT	542	+
chr4	39158723	39159378	GATCACGGAGGACTACAACCA	CTAGAGTGGGTGACAGTGGAC	656	+	M13-tag
chr4	39159168	39159855	AGAAACCTCCTTGCTCCTGAC	AACTCCGTTAATTTGGCTTGA	688	+	M13-tag
chr4	39159430	39160105	ACTACATTCGTGGAGTATAAGAAGAC	TGGAGGGAAGTGGAGAGTTT	676	+	M13-tag
chr4	39160080	39160597	CCCTTCAAACTCTCCACTTCC	GGCTAGATGAGCAAATTGCAG	518	+
chr4	39160602	39161270	AGGGTGGCAGGTACAAATCA	TCACCTTGAGCAGGGAAATC	669	+	M13-tag
chr4	39161107	39161793	AAACACAATCTGCGCTTCGT	TTTTTCTGGCTTCAGTTTTTAGT	687	+	M13-tag
chr4	39161375	39162016	CTCCCCCAAAAAGACTCCTC	CTGAACACTGTGGGTGATGG	642	+
chr4	39161832	39162489	TCAACCTGGTGTATCTCTTGC	GCTAGCACACACCTTCATCC	658	+	M13-tag
chr4	39162221	39162916	GGTAGCAAAAGCCACCTGAA	GTCCCAGGCAAGAAACTGAA	696	+	M13-tag
chr4	39162625	39163314	TCTTCTTTCCATCCGCAGAG	CTGCAGGGGTGTGGTTTG	690	+	M13-tag
chr4	39163124	39163734	CAAACAAAGCAACTGGGTCA	AGAAAAGGCCTCACTGTGGA	611	+
chr4	39163392	39164089	TCGATAAAGTGAGGCACCTG	AGAATGGGGGTCAGAAAACTC	698	+	M13-tag
chr4	39163696	39164269	TTGTGGTTGTTCAGAATGTTCC	TGATGAGATTGGATGTGGGTTA	574	+
chr4	39164161	39164754	GGCGAGAGATAAAGAAGCTGAA	TCAGGGGAAAACACTGAGATAA	594	+
chr4	39164685	39165212	GATGTGCCATTTGTTGCTTCTA	TGTCAGCATTTTGCTGTACTAGG	528	+
chr4	39164913	39165593	TCTTTGGCTCAAAACGGAGT	TCACTTGCTCACAGCCATTC	681	+
chr4	39165334	39165897	CAATGCTACCAGAGCCCATT	TCTTGGTGACTCAGGCAGTG	564	+
chr4	39165707	39166334	CCTGAGGAAACCTGCTTCTG	CCCTGCTCATTAGCCACATT	628	+
chr4	39166107	39166787	TCCTCACAGCAGCAAAACAG	AGGACGGTGGTGTTGACTTC	681	+	M13-tag
chr4	39166298	39166841	GCTGTCCCAAAGCAAACAAT	CACGGGAAGCACATGATAGA	544	+
chr4	39166874	39167515	TGCACATGGAGAAACTGAGG	GAGCAAGCATCAGGGTTCAT	642	+
chr4	39167413	39168092	CACTCCCCAAAGAGAATGGA	CAAGAGCCACTGAGTCACCA	680	+
chr4	39167758	39168403	CTGCTAAGGAGGATGGGAAC	AGAAGTGGGTTTAAATTGATCTGA	646	+	M13-tag
chr4	39168170	39168692	GTGACTGGCTGCCCTAAGAG	TACAGGCTCCCCAGTGATTT	523	+
chr4	39169238	39169741	GCCACAGCTCTCACCAGAGT	AGCTCCTGAGCTTTTTGCAG	504	+
chr4	39169644	39170157	AACGATGAAAGGCACAAAGG	CACGCTTGTTCTCCACTGAA	514	+
chr4	39169701	39170244	CTCCGAGTAAGTGGGACGAA	ATTGTGAACCCAGCACTTCC	544	+
chr4	39169838	39170518	GCAGGGGAAATGCTGAAAG	GACCTCCACCTTGGGACTTC	681	+	M13-tag
chr4	39170241	39170940	CAATACGGTTCTGCCTCCTC	TCCATTTCTGCCTGTAGATGTC	700	+	M13-tag
chr4	39170927	39171606	CAGGCAGAAATGGAAGTAATGTC	ATTTGTGGCCAGGCAATGT	680	+	M13-tag
chr4	39171296	39171994	GAAACTGAGGGACCCCAAA	TTCTGAGGGATTTTCCCAAA	699	+	M13-tag
chr4	39171654	39172190	GCCAGCCATAAAAATCCAGA	GGCAGTTTCCCATTCACTGT	537	+
chr4	39173118	39173751	GGTAATCCCACTTCACTCAGAA	AGTGTCCAGCTTATCCTTTTACATAG	634	+	M13-tag
chr4	39173423	39173969	CCAAATGTCCATGGATAAGCA	CATCTGGCCAATATGGGTTC	547	+
chr4	39174210	39174777	TGGGTTTGGCAGAAAGAAAC	CTGGTCCACCAACCAGAACT	568	+
chr4	39174500	39175198	GTGACCACACAGCCCTTCTG	CGCCTGTCTCATGGAGGA	699	+	M13-tag
chr4	39175113	39175637	CCCCAGGTCACAATAGCAGT	GATGGGAGGCAGCAGATAAC	525	+
chr4	39175483	39176152	TGCAGAGTTATTTCAATCCTGA	GCACTGGTCCCATGACCT	670	+	M13-tag
chr4	39175965	39176636	CAAGACAGGACCCCACTCC	GGCGTCACTTTGTGCTTATG	672	+	M13-tag
chr4	39176946	39177623	GGAGAAAAAGCGTTGGACTTT	TCCATTCCCCTGTCTCTTTG	678	+	M13-tag
chr4	39177436	39178128	CCCTTCATCTACCTTGGGACA	GGGAACGGCAGAGCTAAATC	693	+	M13-tag
chr4	39178112	39178633	TTAGCTCTGCCGTTCCCTTA	TCTGTCCTAAGGTGGGGTTG	522	+
chr4	39178294	39178978	ATTACATCCTCCCCCAAAGC	TAGACTAGGAGCCATGAACCA	685	+	M13-tag
chr4	39178645	39179233	TAGCACAGCTTGCATCTTCAGTTCTCAG	GTTGCCAGAACTTGCCCTAATTCTCATT	589	+	M13-tag
chr4	39179616	39180258	CTCAGAGCAGAACCATGTAGG	GCTTGGATGGAAACTCCTGT	643	+	M13-tag
chr4	39179724	39180421	GGGTTGCCAGCTTTACCTAC	TCTTCCCTCTGCTTCCTTTTC	698	+	M13-tag
chr4	39180281	39180882	CAGAGCCAGGAAAAGGACTG	AAACTCCTGCAAGCCAGAAA	602	+
chr4	39180798	39181466	GAAGGTGTGCTCCACCAGAG	ACGTCTTTTCGCCCATGA	669	+	M13-tag
chr4	39181108	39181759	AGACTTCCACTCTTCCTCATCA	CGTGCGCTCCTTTCATCT	652	+	M13-tag
chr4	39181713	39182405	ACCCGGACTGACACACAAG	GGAGCCACCTGTTCTGGTTA	693	+	M13-tag
chr4	39181976	39182783	TGCGGTGGCAAGCACAGAAG	GACACGGGGCATGGATTTGG	808	+	M13-tag
chr4	39182735	39183380	ATACAATCCACCTAGTGTCCCCAACCAT	TAGAGGAATGTTTGCTGGGTAGGAGACC	646	+	M13-tag
chr4	39183148	39183831	AAAAACCATAACTTTATTGAATCCAC	AAGAGTCTGGAGAAGGCAGTTG	684	+	M13-tag
chr4	39183809	39184474	GCAACTGCCTTCTCCAGACT	GCAGGTGCTAAAACCTCTGA	666	+	M13-tag
chr4	39184302	39185001	CAGAGAGAGAATGAGCAAAAGC	TGTGTGATTGACTTGGTAGGAC	700	+	M13-tag
chr4	39184644	39185341	TTAAATGGCTGAATTATATGGTATATG	GTCAGGGGGCTGTTCTGAGT	698	+	M13-tag
chr4	39185211	39185898	GGCCTGATGTCTGTCTGGTC	GTACATGACCGTGGGTTTCA	688	+	M13-tag
chr4	39185626	39186324	ATGGCATCCCTCCATCCTA	TACAGCGGGAGTGAGAACAT	699	+	M13-tag
chr4	39186086	39186713	TCCCGACAAGAGCCCCCTTC	GGAGGGGAAGGCTCCCGTTT	628	+	M13-tag
chr4	39187849	39188493	TGCACTGGGGAGCTGTGGTG	CCCCCGTGTTAGGGGAGTGC	645	+	M13-tag
chr4	39188099	39188630	TCAATGCGAGTGCAAGAAAC	TATGCCGCATTATTCGATGA	532	+
chr4	39188341	39189040	TCCACTCACATCTCACCATCTC	GGAATCATCAGGAGTTTCACAG	700	+	M13-tag
chr4	39188978	39189657	GGGGCCCAAAGTCACTACAT	TTTTTCATCATGTTTTTGAGGT	680	+	M13-tag
chr4	39189198	39189801	TCCTCCTGCTCAAGCCCTCTCTC	CCAGAAGGAAACCCCAGCCACT	604	+	M13-tag
chr4	39189659	39190358	AAAAACATGATGCAAAGTGC	TGCTTCGAGGAGACAGGATG	700	+	M13-tag
chr4	39190219	39190873	GTTCTCTCTGAATTTTGATCTTGC	CTGGAGTCGGGGAGTCAAC	655	+	M13-tag
chr4	39190489	39191187	AGCGGATGGACTTTGTTGAC	ACTGTGGCTTTCCCCTTACA	699	+	M13-tag
chr4	39191012	39191671	CTGAAGGCACAGCCACGAT	CACTGACTGAAGTAAAAGCCATAGA	660	+	M13-tag
chr4	39191617	39192307	TGGCTCAAGTCCATGCTATT	AAACCCAGCCCGATCTACTT	691	+	M13-tag
chr4	39191961	39192653	CCACTTTGGAGTCTCGATGC	CTACCTATCCTGGCCGACTG	693	+	M13-tag
chr4	39193942	39194572	GCTGCGACCCACAAAGGTAT	TGCATCTCCAGTCCAGTAACC	631	+	M13-tag
chr4	39194135	39194828	AGACTCAGGCCAACAACACA	TTGTAGCAAGTGCAAAATACTGTTA	694	+	M13-tag
chr4	39194896	39195588	GCATCTCCTAATCCTCAGATCC	GTGTGCCTACTTTGGGTGCT	693	+	M13-tag
chr4	39195216	39195896	GCAGGGGAGGGAGCCTGTGT	CGCCTGAGGTGGGTGGAGAC	681	+	M13-tag
chr4	39195787	39196403	AGGTGGGATTCGGTTTTACC	GCGCTCTCCTCCTCCTTTAT	617	+
chr4	39197053	39197750	CAGAACTGTGGGAGAATAACCAG	GGGCTTGAGTCTGTGATTTG	698	+	M13-tag
chr4	39198459	39199019	CGGGACTGTTAGTGGGTGTT	TGTGAGTTGGTGCAAATGGT	561	+
chr4	39199501	39200200	ACCAGAGCCCATGAAGACAG	AAATAGACGTGGGGGAGGAT	700	+	M13-tag
chr4	39199998	39200627	CAGAGCCCAGACTTGGAAAG	AACGGACACCAGGACAAAAG	630	+
chr4	39200166	39200864	GCTCGCACAACATACATCCT	AACGCCAACTCTGCTTCTGT	699	+	M13-tag
chr4	39200794	39201474	ACTGAGTCCTCATGGCATCC	GACCCCGGAATTAATGACCT	681	+	M13-tag
chr4	39202852	39203378	TGAACTGAGAGGCAGGGATT	GGGGGAGGATACTTCAGAGG	527	+
chr4	39203942	39204594	AGGATCAAGGGGAAAAGGAA	GGTAATGGCAAAGCCAGGTA	653	+
chr4	39205514	39206046	GATAGGAAAACACGGGAGCA	TCCCATGCTGTTGAATGCTA	533	+
chr4	39208182	39208816	AGGCAAGAGGGCTCCTAGAC	GCTGAAATCAGGGAAACCAA	635	+
chr4	39209390	39209983	AAGGACAGTGATGGGACCAG	GATCTTGGTGGCTGAAGCTC	594	+
chr4	39211637	39212303	GGGGACAAGAAGATGAGCTG	TGCTTTTCAGGGAGCATCTT	667	+
chr4	39211998	39212533	CCTGTCACAAATGCCATCAC	CTCATCCCAGGATTTCCAGA	536	+
chr4	39215364	39215887	TCTCACCTGAGAGCCAGCTT	CCCACAATAGCTAGGGCTGA	524	+
chr4	39217505	39218028	TTTCCCCAGAGAACATTTGG	CACACCGCTTTGAATGTGAC	524	+
chr4	39219179	39219696	GGACAGTCAAGTTCCCAAGC	GCCAATGGGCAGACACTTAG	518	+
chr4	39220140	39220712	CAGTACGGGTTCCATTGCTT	CCATCCCTCAAGAGCAGAAG	573	+
chr4	39220693	39221340	CTTCTGCTCTTGAGGGATGG	GGGATAACAGGAGGTGCAAA	648	+
chr4	39224827	39225491	TGGTGCTCCAGGGAATTAAG	TTCTTGTTGGCTAGGGCTGT	665	+
chr4	39225977	39226547	AAAAGTGGACCGGCTATGTG	CCAGAACAAGGAGGGCATTA	571	+
chr4	39228962	39229537	GTTGCTCAGAGCCCAAAAAG	TGAACGTGCGCACATATTTT	576	+
chr4	39234255	39234933	ACGGAAATCTGCAGGAAATGTCTCTAGG	GATGACAGCCACTCATACCACACAGAAG	679	+	M13-tag
chr4	39234725	39235428	TGCTTGTACACCCGTTGTAGGGATAAGA	CAGTTGCTAGTTTTACTGGCCCCTGTTT	704	+	M13-tag
chr4	39236518	39237307	CCACTCCCCCAGAAGCTTTCATTACTAT	GAGCCACCCAGACATCCAAGAACAATA	790	+	M13-tag
chr4	39237911	39238648	GGGGCTGCCCTCTTAAATCATTTTCTTA	AAGGAGGCAGACTTGTACCAGAAAGAGC	738	+	M13-tag
chr4	39238525	39239211	AAAGGATGTGCTCAGAGAGGAGAAAAGG	CTCCAACCTTGATAATTCCTGTGCTCTG	687	+	M13-tag
chr4	39239119	39239808	CGTGCAAAATGAAAACATGG	TCCCCTGAGAGGGAGAATTT	690	+
chr4	39240919	39241465	GAGTTGCGATTCTTCCCAAA	CCTCACCAGGGACACATCTT	547	+
chr4	39241446	39242065	AAGATGTGTCCCTGGTGAGG	GCTTGCGATGACAGTTTGAA	620	+
chr4	39243236	39243835	TAACATTCCCTCTGCCTTGC	GCTCTGGGGTGATGATAGGA	600	+

## Sheet: chr7_43Mb
Supplemental Table 5. Primer sequences and genomic positions for amplicons used for marker discovery at all loci.
Start and end position of the amplicons refer to the CanFam 3.1 dog assembly.
chr7:43Mb
Chromosome	Start position	End position	Forward primer sequence	Reverse primer sequence	Product size (bp)	Strand	Notes
chr7	43633346	43633862	ATGCGCCATACTTTTTGAGTCTTGTGTC	AAGAGAGGTGAATCAGAAGCGATCCAAT	517	+	M13-tag
chr7	43641308	43641852	ACCCACGAGAGAAGATTACAGACGTGAA	TATTGAGAAAAGGACTGCAGTGGGATTG	545	+	M13-tag
chr7	43647855	43648384	ACAAATTGGTCTCTTTGCCCAGAGTCTT	TCAAGAGATCTGGGGTGAAGTCTGAAAA	530	+	M13-tag
chr7	43658274	43658853	CTTACAAATTGGGGTGGTTTTCCACATT	GTGTGTAATCCTCAGGGAAGAACTGCTG	580	+	M13-tag
chr7	43667604	43668221	ATCGATGAGCCCAGAACCAGAATAAAAG	AGAGGCTGGATAACTACCACTCCCTGAA	618	+	M13-tag
chr7	43673713	43674215	AGAACCATCTCCCTCTGTTCTGCATTTT	CTTCCCCAGTACATCCGTTTCTTTATGG	503	+	M13-tag
chr7	43677286	43677791	CCTATTGAAAAATGTGTTCCCAATCTTCCT	GCCATCCAGGCATGTCTTAGAGAAAATC	506	+	M13-tag
chr7	43680314	43681004	CAGCATGAGGCAAGAGGTTA	AGTGATTGGAGAGTGGGACA	691	+
chr7	43680876	43681494	ATTTTGCCCTCTTGGGTCCT	GGCCCTTTATACCAAACACC	619	+
chr7	43681018	43681663	TTACTCCAACGTTCTTGGACTTCATTGG	CCGCATACAGCTGCTAATATCAGGAAGA	646	+	M13-tag
chr7	43681515	43682204	GAGCACGGAGAGTGGGTAAG	CAGTTGGGAAATACTGGCCTAT	690	+
chr7	43682057	43682734	TTTCACAAACAAAAGAGATGTTATCAG	GAGAAACAGAGAGAGCACAGCA	678	+
chr7	43682442	43683122	AGCCCCTCTCACCAGCTAA	AGGAGGAAAGCCAGGAGAAG	681	+
chr7	43682678	43683279	GGGAGGTTGCTTTTCTTTCACTCTGTTC	ATGGGACAAGCATCAAAGAAGAATGATG	602	+	M13-tag
chr7	43683255	43683945	CATTCTTCTTTGATGCTTGTCC	GTGCCGCCCTATCTGAGTAA	691	+
chr7	43683677	43684328	CCCCAATTCCTGACACATAGA	CTCGGGGCTTGCATTTTAG	652	+
chr7	43683888	43684584	CCCCTGCAACATCACAGTC	TCAGAGGGTCCAGAAAGTGC	697	+
chr7	43684439	43685134	TGGACCTGTCGAAACAGTACAAT	TGAACCTTTATTATTAGTGCCATCA	696	+
chr7	43684852	43685477	TTCATAACCTTCCCCAGAGC	TTCTTTAGAGGAATAAGCATTACACAA	626	+
chr7	43685103	43685779	TGCATGGTGATGGCACTAAT	TGCAGTGTGAAAAAGGACTCA	677	+
chr7	43685549	43686246	CCTGGAAGAAGCCAGCATTA	AATCTCTCTACTGTGTATTAGGGAATGT	698	+
chr7	43686062	43686524	TGGCTAACTCCTAGCTGTACCAT	AAATGCCCTCCCCTATTCTG	463	+
chr7	43686216	43686886	TGCACATTCCCTAATACACAGTAGA	CAATCCTCATCCTTCCCCTTA	671	+
chr7	43686684	43687339	GGCTGTGAAAAGGAATGGAA	TCACTGGCATCTTCAGCATC	656	+
chr7	43687603	43688208	AAAAAGATTATTCAAAGGACACAGC	CTAATGGATGCCTTGTGCAG	606	+
chr7	43688051	43688747	TGGGATGAGGAATAGGCTTG	GGTGGCACGTCCATACAAT	697	+
chr7	43688327	43689004	ATCCTGCCCTCCTCCAATC	TGGCCAAGATGTAGAGAAATTG	678	+
chr7	43689278	43689954	AAAAACTCAGCTCCTTGCTTC	CCACCTTGCTCCTCATACCT	677	+
chr7	43689359	43690051	TTGACCCAGGCTTCAAAGAG	TTTTTCAGGATAGAATCAAGACTCC	693	+
chr7	43690053	43690635	AAAAAGAAAGAAAAGAAGAAAAGAAAAC	GCCTCAGTCAAATCACAAGAGA	583	+
chr7	43690458	43691111	AGCAGTAATCATAGGGTACAATGC	GCCATCATCTCCTGTTTTCC	654	+
chr7	43690859	43691555	CTGTCTGGAGCTGTCCTGTG	GACAAGAGGGGGTCTGTCTC	697	+
chr7	43691084	43691778	CTGCGAGAGGAAAACAGGAG	AGTCCCAGGCTTCTCCAAAG	695	+
chr7	43691619	43692297	ACAGAGGGTGATGGGAATGA	TTGTAAAGAGGGACAATCTGGTAG	679	+
chr7	43692175	43692799	CCTTTATACACTAATCCTGCCTAGC	ATGGGAAATGCTGGAGACAA	625	+
chr7	43692545	43693231	CAGATGCCTGGACAATAGTAACA	CAATGAGAAAACCTAAGTAAAAATCGT	687	+
chr7	43692772	43693466	CTTTATTCTTGTCTCCAGCATTTC	AGAAAGGGGATATACAGCATTTG	695	+
chr7	43693296	43693907	ATTTGGTTCCATTGGGATGA	TTCAGAATCAATTTATGGGAGA	612	+
chr7	43694085	43694783	AGGCTGCCCCCTGAATTA	AGTCTAGGGCAAAGGTGGTTC	699	+
chr7	43694180	43694877	GGATTTATGCAATAGGGACCTG	AAAAACTTCTGGAGGAGAACC	698	+
chr7	43694644	43695167	GAGGAAATATTTGTGGGATCCACGGTAG	CAAGATGAACCTACTCGGCAAAAATCCT	524	+	M13-tag
chr7	43695042	43695574	CCAGGCGTCCCTAGAAGGTA	AATACCGGATGACCGTTTCA	533	+
chr7	43695294	43695982	TTATTGCAGGCGAGTTCCAC	GAGCCTAACACGATGCTCCT	689	+
chr7	43695678	43696086	TCTCTCTTCATCTGTAGTCCTACGGTGCTC	GGGATGCCAGGTGTTTCTGAAGAG	409	+	M13-tag
chr7	43695966	43696543	AGCATCGTGTTAGGCTCCTAGCGTCT	GAGACGTCGCTCGCTGATTGGT	578	+	M13-tag
chr7	43697813	43698405	TTTTTGGTTCTGTAACCTTTGTT	AGCAGGTCTGCAGTGACCAT	593	+
chr7	43698210	43698846	CCGGCTGGTTGTTCATTA	TCAGAAAAATTCCACCAATATCC	637	+
chr7	43698611	43699303	TTGTTCTACTTTTGATTTTGACTCC	AACACATACCGGGCCTGAC	693	+
chr7	43698818	43699469	CATACAGGATATTGGTGGAATTTTT	CCCCAACGTGAAGTAACAAGA	652	+
chr7	43699267	43699917	TCCTGTTGTTTGTGGCTTGT	ACCTCGCCTGAATTGCTTTT	651	+
chr7	43699467	43700117	GGGGGAGATATGTGAGTGAAA	GACTGAAGGACAGGCAGGAG	651	+
chr7	43699870	43700451	TGTCAGAAATGAGAAGTCCAAAGA	TCTACAACTAAAGGGCAATGGATA	582	+
chr7	43700328	43700996	TCCATACAAACTGAGGACATGG	TATATATGCCAATAGGTTTTGATGA	669	+
chr7	43701013	43701702	TTTTTAATGCCCCAGATGTT	CCACACTTGTTTGGTCCTTG	690	+
chr7	43701176	43701860	CAGATAACAGCCTGGTGAGGA	AAAAATTACAATGTCACCAATAAGC	685	+
chr7	43701913	43702567	AAATGCAGTTTGAGGCTTATTG	GATGGACTTCCAGTGGCTTC	655	+
chr7	43702338	43702991	GGCCACTAATTCTTCTAGGTTCA	GAACTACACCCTAACCACCTGTC	654	+
chr7	43702481	43703152	CTTTTTAGGGGAAGGGCATAG	TTCTGGTTGTCGTTGTGTGC	672	+
chr7	43702951	43703620	CCAACCTTTTACTTCCTAGACAGG	AATTATTAGGAGATCGCACAGG	670	+
chr7	43703652	43704351	TTTTTAATGATCTGGGAATGATAA	TTCAAATATCTTCAAACTGCAAA	700	+
chr7	43703953	43704634	AATGGCAGTGTCTTTGCTCTC	ATTCAATACGTGTAGCAGGTGGA	682	+
chr7	43704661	43705290	TCCCTCTTATGTATTTGGTTGATCC	TGTACTGACATGCTATAATCTACAAATG	630	+
chr7	43705739	43706416	AGGTAGTACATACATGGTGCAAA	TGGAAACACGACTTTCATTGAT	678	+
chr7	43705960	43706587	AACTGAGATGGCCTGCAAGT	CAAAGGAGAAAGTGAAGGAACTC	628	+
chr7	43706388	43707086	GGGTCTCATCAATGAAAGTCG	AAAAAGGTGAAGAAAACTGGAG	699	+
chr7	43707097	43707776	TTTTTCTATTTTCCATCCTACTCTT	AGCAGAGAGTAAAACAGGCTCA	680	+
chr7	43707674	43708266	AGTCCGCATGTAGCATACCA	CACTCCCTCATCCCACTTTG	593	+
chr7	43707745	43708344	CCTAGTCTGGTGAGCCTGTTTT	TGTTTTCTAATTCCTAAGCATCTC	600	+
chr7	43708567	43709183	CAAAACCACAAAATAAGATGATAGA	TCAATCTTGGCAAACGTAGTCT	617	+
chr7	43708851	43709506	TCTAGAACCTGCGAAATCCAA	ACAGAGAGAGAGGCAGAGATAGG	656	+
chr7	43709551	43710242	AAAAAGAATAAAGAAACCTGACAAG	CCTTTTTCAATCTACCTTCCACA	692	+
chr7	43709996	43710656	CCGTATGATTATCTTGATGGTTG	TCTCTTTCACTTCCTGGGATTC	661	+
chr7	43710259	43710935	TGGGATGATGGTTATGTGGA	AAAAATCCATGCTGTCATCTT	677	+
chr7	43711100	43711578	ATCTGGGCTGCCTGACAAC	GCTGCATAGTAGAACAGGCACA	479	+
chr7	43711379	43712031	CAGGGAAGTGCAAAACATCA	TTCTCTACTCTTACAAGCTGCCATAA	653	+
chr7	43711795	43712487	CTAAGTTGGTTTCATGTTCACC	CACTGATTCTCCCGTCATTT	693	+
chr7	43711996	43712669	TTCAGACTACTTATGGCAGCTTGTA	CAAAGAAATACGGAAGCAACCT	674	+
chr7	43712540	43713220	GGGTATATGTAGGGGACGTGAG	AAGGGGTGGAATAGTGACCTAA	681	+
chr7	43713010	43713679	GGAGTAAGTAAAATCCTGTGATACTGGT	CCTACAATTCATGTTGTCTTCAGC	670	+
chr7	43713409	43714098	GACTCCGAGGCTAACCTGCT	AAAAAGGAATAAGAAAACTAGATTGATG	690	+
chr7	43714115	43714802	TTTCTTATTCCATTTTATCTTTACTTTG	TCAGGATCCCTGTTCCTTGT	688	+
chr7	43714623	43715303	TCCTACGACTGAAAATCCCTTT	CATATGGGGTAAAAGGAAGC	681	+
chr7	43714865	43715564	GAGCGTCCTCAGAAACCAAG	GCTTCTGCTCAATCCCACTC	700	+
chr7	43715336	43716029	TTTTTGTAACTCCTGAAATGTTACC	CAAGGGTCTCCCAGAAGAGG	694	+
chr7	43716234	43716898	TTGAGAATCCGAAGTTCTTTTTCG	GGACCCAAGATCCTGCACTA	665	+
chr7	43716671	43717368	GCTTTGGTTAAGAGAAATCATAAGG	AAAGATAAAGGTAGAGTATCAGCTAGGA	698	+
chr7	43717098	43717791	CAGTACCATAGCTTTTGCCCTAC	ACCTGACGGAAGACAGAGACA	694	+
chr7	43717411	43718071	CCCTTTGTATTTGTGGGTTGATA	AAACCATGAACTAGCCCAACA	661	+
chr7	43717840	43718533	ACATCTGAGCCCTCTCTAATCTG	TCAAATTCAAGTAATCTGTCCTCTG	694	+
chr7	43718044	43718743	GCTGTGTTGTTGGGCTAGTTC	CTGGTGGAATGGCTAAGGAG	700	+
chr7	43718607	43719291	AGAGCCCTGTGGGAATGAGT	AGTTCTGTGTCTGATGAGGTCAGT	685	+
chr7	43719126	43719825	AATTTAGTTATGGGGCTTGTGAA	AAAGTTCTTCTCGCTTTTTAGGA	700	+
chr7	43719579	43720268	TCTCAAGGGATTGGAAAAGTG	TCTTCACAACAGGCGGAGT	690	+
chr7	43720049	43720747	ATAGTCGGGGGAGGAGATGA	TTTCGGCAATGAAGGTAAATG	699	+
chr7	43720407	43721074	AGCTTGAGAAAGCCATCACC	CCCAAACCCCAGAAGGTCTA	668	+
chr7	43720781	43721347	CAACATTTGAATAAAGAGTCAAAGC	CCAAAGAAGTCAATCTTGTTTAAG	567	+
chr7	43721052	43721748	TTGTAGACCTTCTGGGGTTTG	TGCTGTATTATCTGATTCCTTCCA	697	+
chr7	43721522	43722211	AAGACCATGCCTGAGAGATAAAA	AACTCCAGCGAGGAAGAGTG	690	+
chr7	43721964	43722589	TTGGGAAGCTCGTAGGGTAG	CCCACGCTCAGGTTCAAG	626	+
chr7	43722135	43722801	AGTGCCTGGTATTTCAGTTCG	CACAGCTCCCCTTTCAGCTC	667	+
chr7	43723160	43723681	TTTTTAAACCTCTTCCTGCTG	CGTGTCATGTTCTTCATTGGA	522	+
chr7	43723349	43724046	AGTTTGGCCCCATATATTTTC	TCCATTCCTTAGTATCAAAAATGGTT	698	+
chr7	43723918	43724496	TGTTGAATGTGGTGACATGAAG	TCAGTTCTGGTTTAAGAGGAGTTG	579	+
chr7	43724913	43725435	ATTATATTTGTTTATTTGAGAGAGATGG	GTACAGACAAGAACAGTTTAAGTACTGG	523	+
chr7	43725443	43726135	TTTTTGCCCTTTGAAATCAATTTTT	AGTCATGTGCCTCAGGTTCC	693	+
chr7	43725832	43726308	TTCATATTCCTATCCTTTTACTTCTCTG	GAGTAGAGTTCTTCACAAGTCACAAA	477	+
chr7	43726103	43726758	ACTGGATGAATGTGGAACCTG	TGTCCCCTACACAAAAGACCTC	656	+
chr7	43726646	43727340	GATGCTTTGCCAGACCCTTA	TTGAAACAAGATTGCAGGTTATC	695	+
chr7	43726984	43727683	GAACACATTCATCAACCTAGCTAAAA	ATGACGGAAGCAGGCTGAC	700	+
chr7	43727370	43728069	TGGATATCACATGTTTCTTTTCA	AAAAGATTTTTGCCAGACTAAAG	700	+
chr7	43728498	43729189	TTTTTGTTATCTTTCTTCCTCTAGTTG	TTCCTGCCTACAGTTAGCTCCT	692	+
chr7	43728724	43729419	ACGAGACGGTATGGCTGTG	GGTTAGCTGGCTCTCAGTGG	696	+
chr7	43729163	43729714	GCAGCAGGAGCTAACTGTAGG	GAAGAGAAGTTTCATGTGTTGTGAA	552	+
chr7	43729400	43730099	CCACTGAGAGCCAGCTAACC	CCTTTACCCAGTCTCCCACAA	700	+
chr7	43729908	43730482	GGAACTGTGATCATGAATAATGC	AAATGCTTAAAACAAGGATTGC	575	+
chr7	43730190	43730860	TTTTCCTCAGTTTTTATGTGATGG	AAAAAGCTAACAAGAAGATGAGC	671	+
chr7	43731175	43731870	AAAAAGATGTGAGCTGGGATG	CAGCAAGTGACCAGGAAAGG	696	+
chr7	43731762	43732443	CCCAACTTATTGTTTTAGTTTTGTCTT	AACCCATTGAAGAATTGTGTTG	682	+
chr7	43732270	43732849	GCACATGGTAACTACACCAAGG	GTCTGGAGGATCTAAGCAGGAA	580	+
chr7	43732422	43733121	CAACACAATTCTTCAATGGGTTA	GGGGTTACGTTGGCCTCATA	700	+
chr7	43732830	43733393	CCTGCTTAGATCCTCCAGACA	GGTTTAGGGGTCAGCCTAGC	564	+
chr7	43733093	43733734	AGAAAAAGTTATGAGGCCAACG	CTGACTATTATTGAGTGTTCCAACTCAT	642	+
chr7	43733788	43734358	TTTTTAAATGGAAATACAGACTTACC	ACTCTGCTCAGAAATGTTTTGC	571	+
chr7	43734119	43734812	TCAATTCCAGATAGATCATAGTTCTCA	TGAACAAAACTGCCAAGAGC	694	+
chr7	43734534	43735151	AATAACCACCCCACAACCAC	GCCACCTTGTTTTATCCATCA	618	+
chr7	43734785	43735466	ACCTGAATGCTCTTGGCAGT	AATGGACAACCAGGAAGGAC	682	+
chr7	43735229	43735740	TCTGGCTAATATATGCATGTTTGTCT	CAGAATGATGGTGTAAATGAATGG	512	+
chr7	43735425	43736107	TTCAGCAAGCTCTGGACTAGG	GGTCTGTGCTCATTTCGGAGT	683	+
chr7	43736623	43737212	CCTTAGCTGTAAAGTGGTGATGAA	TCAACAGACAAAAGGGATGAAA	590	+
chr7	43737005	43737699	GAAGTAGACTCTTTAGGCAAGAAGG	AATCCACAATTTGCAGGTTATT	695	+
chr7	43737266	43737942	AACAAACTTAATAACTGCTTGAAAATG	AAAAATCCTAACAGAAAATGTGAGT	677	+
chr7	43738007	43738536	TTTTTAAGGAACTGTCCATACTTG	GACCTAACAGTCCAGGGGATT	530	+
chr7	43738379	43738865	CCAGTACCTTGTTGCTGGTTG	GCCACAGAATTAAATGCAGGT	487	+
chr7	43738612	43739261	GTTGACATAAATGCTCGTGGAA	TCTATATACGTGTGTATGCATCAAGAAA	650	+
chr7	43739628	43740267	AGAGGGAGAAGCAGGCTTGA	TTTTTAATCCAAATCCTTAGTAATCA	640	+
chr7	43740164	43740778	GGATTGTTTTGCTATTCAAGATCC	GGTATGTGAGGGGATGGAGAT	615	+
chr7	43740549	43741214	TTGCTAAATGTACTAATGAAGTTGTTTC	TGGGGAGGGTGTGCTAAATA	666	+
chr7	43740870	43741546	GTTGTACATCAGATCCCCAGAA	CCCCCATCCCATGTATCA	677	+
chr7	43741548	43742149	GGGGGAGCAGTGTAACTATC	TTATCATTGGGAAAGCAACC	602	+
chr7	43741953	43742623	TTGTTATTGATATGGTTGGATTTACC	GTACAGGCATGGGGAACACA	671	+
chr7	43742338	43742982	TTTACATTTGTTGCCATTTCTCTT	CCATTCCTTTGACCAATTCCTA	645	+
chr7	43742603	43743302	ATGTGTTCCCCATGCCTGTA	TCTAAACCCCTGCACTAAGAGA	700	+
chr7	43743127	43743808	GGAGGTCAAGGGTCTACAGAAA	CAGATCCCCAAAATGAACTGA	682	+
chr7	43743620	43744313	CTCCTCTGTCTTCTCCAACCAT	CCACAGTTAGGTGGCTTTGTATC	694	+
chr7	43744190	43744735	CCAGCCCCATATCCATTCT	GCAAAGTCAGCACAGAGAAAA	546	+
chr7	43744300	43744999	CCACCTAACTGTGGCTCATCT	CACTTTCCAACTTCCATCACA	700	+
chr7	43744786	43745357	CATTTATCCTTACATTTATTCCAGGTG	CCAAAAACACAGAGCACCAAGT	572	+
chr7	43744980	43745678	GTGATGGAAGTTGGAAAGTGG	CCTGGCAACACACCTAGAAG	699	+
chr7	43745498	43746168	CAGCCTAAAAAGCAAGAGACTG	GCTGGAGGACAAAAGATATGTG	671	+
chr7	43745977	43746633	TGGCAAGGAAATAGGGAGAA	TTTTCACGGGCTTTTAGTGC	657	+
chr7	43746180	43746853	GCTTTTAAGGTGATATGTTATGTTTGA	CTGGTTTGTTCAGAGAAGCTGT	674	+
chr7	43746714	43747361	ACCATGCTTCCATGTTCAC	TGGTGATGAATACAATGAGATGA	648	+
chr7	43747061	43747732	TGCATCCCCTGAAGAATAGG	TTTGATGGGTCTGCTACAAAGT	672	+
chr7	43747323	43748014	ACTGGTATTGTCCATTTCATCTCA	AAAGCATATTCGCAGTTTTCAAT	692	+
chr7	43747914	43748613	CGGAAAGGACTACCACACG	TGAGCTTCACTCATTTGCTTT	700	+
chr7	43748485	43749163	TCGGAACTAAACCGATGGAC	AGACTCGGGAAGGCAAAAAT	679	+
chr7	43748919	43749494	TTTCAGTAAAGGTCTGGTGTGG	CCAGGAACATGGCTTTCAT	576	+
chr7	43749110	43749763	GGGAATCGAGCCACAGAGTA	GCCTCATGGCATACTACTAGATCA	654	+
chr7	43749740	43750405	TGATCTAGTAGTATGCCATGAGG	CCATGGTTTCTGAGTATTGTTGA	666	+
chr7	43750290	43750961	CCACTTGCTTGGGAGAAGAC	TGTCAGTACCCTAAATCCTTATGAAA	672	+
chr7	43750779	43751478	AGATCTTTGAGATATGGGTGGTT	GGGCTTACATTGGGTTCTCA	700	+
chr7	43750882	43751542	TTTTGTGTTCTTTATTGTTTGAGCA	ATACACCTAGGAGATGACTGAAGG	661	+
chr7	43751578	43752277	AAAAATGTAGGTACTAATTCCTTTGA	TGCTCTCAAATTTTCATATAATCTAAT	700	+
chr7	43752072	43752753	CAGTTTGAGACCCCCAAGAA	TGTGTAGGAAAGCTGATGGTGT	682	+
chr7	43752524	43753077	GCTATGGGCTCCAGACACA	GGAATACTGATCTATGCGATACAGG	554	+
chr7	43752671	43753322	GCTCTGTACCACCTGTCTGTAATC	TCCAAAGCAACCCAACCAT	652	+
chr7	43753043	43753742	TCCTAACACACCTGTATCGCATAG	TTTGACCCTTTAGCATAACCAC	700	+
chr7	43753270	43753965	TTGGAGTTTCATTTGTTGCTGT	GAGAGAGGAATGGATAGCAGGT	696	+
chr7	43753693	43754392	GGGAGGAGCAATAAGGTTGA	GCCAGCTAATGACAGACTCAAAA	700	+
chr7	43754215	43754914	CTGTGTTTACAGGGTTCTCTATGTC	TGGTGTTAGCTGTGCATGAAG	700	+
chr7	43754470	43755161	AATGGTTGTGTGGTAGAGTTCTCA	CAACAAGTGGTCCCAAGACA	692	+
chr7	43754895	43755592	TTCATGCACAGCTAACACCAG	ACCCCTAACCAACTCAACTCC	698	+
chr7	43755088	43755775	CCTGCATATTTACTTTTCTGCTCTT	CAGTCCTGCTCTTCATCAGCTA	688	+
chr7	43755576	43756119	TTGAGTTGGTTAGGGGTGATG	AACAATTTCTACAGAGTTCCCTTGT	544	+
chr7	43755753	43756327	TTAGCTGATGAAGAGCAGGACT	AAAAATCCCTTTTGACACAGAAT	575	+
chr7	43756093	43756778	TTACAAGGGAACTCTGTAGAAATTG	TGCAGTAGTCACGAAAAGAATG	686	+
chr7	43756511	43757087	GACATCATAGAAAAAGAGCTAAAAAGTG	ACAAAAGGACAGTTCCAGGTC	577	+
chr7	43756872	43757571	GCCAAAGCTGAAGGAGTACC	TGCCAATGTGTCTTCCAGAG	700	+
chr7	43757360	43757918	TTAAAATAACCCGAGCAAGAAA	TCTCCCCCTTTCCAAAATGT	559	+
chr7	43757502	43758198	GTGAGGATGTAGAATGACAGGAAC	CAATGTCCCCAGCAATGAGT	697	+
chr7	43758078	43758777	CACCAAGAATGAACTCTGATGTAAA	GTCCCACCAACAACTGATGA	700	+
chr7	43758568	43759258	TGCAAAGGAATGACCAGTCTAA	AAGCTACTGTGAGAAATGGAGGA	691	+
chr7	43759132	43759646	TGAAACATTCTTCTAAATCTGTAATTC	CAGAGTACATTTCGTTTTCTGATCTT	515	+
chr7	43759540	43760213	GCTGGGGTCTGATCTGTCAT	GGGGATATTTCTAGTATTTACCCATT	674	+
chr7	43759909	43760606	GAAGAAACAGAGAAATGTCTTAGGG	TGTGAGGGGATGCTTATGTTT	698	+
chr7	43760413	43761096	CCTGTAAATCGGTGAGAAGAGTG	AAAAGGTACAAGAGTATAAACGGTCCT	684	+
chr7	43760848	43761395	TGTGAGGTTACGTGGCTAATG	CAGAGTAAAACGGTGGGGAGT	548	+
chr7	43761061	43761708	GGGGAAGCTAGGACCGTTTA	ACACCCCTCTCCCATACCTC	648	+
chr7	43761585	43762215	TGACCTATTATGGCTAGATTTATATGG	GAGATTTTCCGTGAGTTACCCTAGT	631	+
chr7	43762068	43762758	TGGTCCTAGTTTTCCCATGAA	AGGTCTCGCCAACCCTCT	691	+
chr7	43762274	43762973	TTGCTTCTTGTGGCTTTTGA	CACACCCTCTCTTGATGTGGT	700	+
chr7	43762677	43763304	TTGCAGCCAGTTACTTACTCAGA	TGTGCTAAATAGCTGTTCTTGTTT	628	+
chr7	43762948	43763603	GGTTTACCACATCAAGAGAGG	CTATTTCCCTTCCCCCTCAA	656	+
chr7	43763503	43764126	TGACAAGAATCCAACTCTCTTCTG	GGAAATCCTCCATTAAACCTG	624	+
chr7	43763935	43764608	TCTGCACAATGCTGTGACTTT	CCTTGGGGCTACAACTTCAG	674	+
chr7	43764508	43765023	CATGGTGTTGACTGAGCTGTG	GCTGGGAGATTTTAATAGACTTCTTTC	516	+
chr7	43764674	43765253	CCACAAGCCGCAGAGAAT	AGGAATTAAAACTCTTTGGATAAACAT	580	+
chr7	43765059	43765753	AGGGATTTGGTCATCACCTT	TCGGCACATTGAGGGTTTAT	695	+
chr7	43765319	43765978	CCATGTGTTTTTCTGCATTTTC	AGCTGATACACGGCTTCAAA	660	+
chr7	43765740	43766305	CCTCAATGTGCCGAATTTTT	GCCTTCAAATATACCTCTTTTATGGT	566	+
chr7	43765955	43766616	GGGTTTTGAAGCCGTGTATC	TGTGTGATGTCCTGCACTGA	662	+
chr7	43766516	43767135	TGGAATGTAAGGTTAAGAGGTAGAGC	TTGTTGAAGGTAGAGAATCAAGTCC	620	+
chr7	43766852	43767542	GTTAGGTTGTCAGCGGAGGA	CCCTTGGCAGGAGAGCTATAA	691	+
chr7	43767173	43767837	TGAGGTCTGCTGGGTGAATAC	TTGAGAAATCTTGCCCTGAGA	665	+
chr7	43767540	43768239	GGGCAGTTTTACTTGGTGGA	TTTCTAGCTCTCCCTCAGATCA	700	+
chr7	43768009	43768686	GTGCATTTCTGTGCCCAAAC	ACGTTCATTACAGTTTCCCATGT	678	+
chr7	43768252	43768898	TCTTTGAGAAACAACAGGAAGAA	CGCACTGTACCCTCTGGAGT	647	+
chr7	43768665	43769361	CATGGGAAACTGTAATGAACGTA	AATCAATCGCAGAGCAGAGG	697	+
chr7	43768971	43769655	CTTGGAGCTGAAGGTTTGATAA	TTCTTTAGGACAAGTATGAAGTCTGAA	685	+
chr7	43769406	43769866	TGGTTTGAGTCCCTTGTTCC	AAGGGGATCCCATCTGAGTT	461	+
chr7	43769767	43770166	AGAAGGCAGACGGTAACGAG	CATTCAGTTTTATGCCCACCA	400	+
chr7	43769900	43770587	TCACCACTCAGATCCCATCA	AGTTTCCATACAGTGAGATGTAGCA	688	+
chr7	43770137	43770773	CTGATGTCTTGGTGGGCATA	TTACTATCCATTGAAATCTGTTGTTAAG	637	+
chr7	43770595	43771294	AAATCTTTCCAGACCTCTTCTCC	TTCTCTCACCACAGAGCATAAAA	700	+
chr7	43771044	43771604	ACCTACAAGAGTGATGCTGAGG	AATGACTACCAAGTCTGCATGAAC	561	+
chr7	43771277	43771974	TGCTCTGTGGTGAGAGAAGATT	CTGTAGAGACTTCGGGGTAAGC	698	+
chr7	43771724	43772423	TGTTGTAACCCTTAGTTAGTTCATTTG	GGCCACAGTAGACAGGACAGA	700	+
chr7	43772084	43772756	CCCTTTGGAAGGCTTGAACT	AGGAAGAAAGAAATCTCTATATAACTCC	673	+
chr7	43772346	43773009	AGTTGCCCTGGTGTTTAACG	GGCCGGATAAAGGGATACAT	664	+
chr7	43772594	43773061	GTCCCATTTCTAAACTGGATGGTGGTCT	AGGGCCAGACTAAATCCTAGCCATCTCT	468	+	M13-tag
chr7	43773045	43773448	GGATTTAGTCTGGCCCTCAA	TGGACAGCTTTTGGAAGAGG	404	+
chr7	43773217	43773888	TTAATCTTAAACTGTATCGGTTTTG	CATTCTGTGATGAGGAGAGGAA	672	+
chr7	43773686	43774385	AGACTGCCTCCTTCCACACC	CTGCCCCTCAATCTCCATAC	700	+
chr7	43774285	43774984	CAGAATCCTACTAATGAGTTCCTTTT	GGGGGCAATCTAATAACAAA	700	+
chr7	43774827	43775462	GCCATTTTTAAGGCAGCTTG	CCACCCAAAAGAGCAAAGTG	636	+
chr7	43775111	43775691	TTTTTAGCTGTGCTCAACAGA	AGAACCAGAAATATGGCAAGTTA	581	+
chr7	43775356	43776037	TTTTTCTTCAAAACAATTCCTG	AAAAACCCTAAATCCATGCAG	682	+
chr7	43775892	43776591	GGGTGCTTTTCTGGTGAATG	GGTTCTCCTGGTTTTGTCCA	700	+
chr7	43776052	43776746	TTTTTAAATCCTATTTGTTGGCAAAAT	TGAGGACACTTGCTAATGGCTA	695	+
chr7	43776572	43777116	TGGACAAAACCAGGAGAACC	TGGTGCCTTAGCAGTTGTTG	545	+
chr7	43776760	43777459	GCTGATGCCCTCGTAGGTAG	CTGCCGTTGGCTGATACAT	700	+
chr7	43777176	43777830	CACAGAAGAGGCAAGAGAGTGA	GAGGTGGGGAAGGAAACCA	655	+
chr7	43777479	43778172	TGATCCAGACTGAGCAGTGG	AGGGCATGGACAGCAAAATA	694	+
chr7	43778055	43778667	AAAAAGCCATTTGAGTTGTTTAC	AGAGAGCAGTCGGCTAACCA	613	+
chr7	43778547	43779246	TCATAAGTAGTTACATTGTCATGAAGTC	TTCACCTTGGACACACTAGGC	700	+
chr7	43778788	43779485	TGCATTGGTAGAAACCTATGTGA	TTTTTAGAAAATAACCATCACTTAAACC	698	+
chr7	43779500	43780191	CATGCCGGTTTGCACATA	GAGCTCACTGTCCATGAAGAAA	692	+
chr7	43779724	43780414	TAGGGGTTGGTCACTGCTCT	GGCCTCTGATGATGGCTATT	691	+
chr7	43780241	43780877	CTTGTTTGGGTGTGGGAAGT	TCCTTAGAAAATGTGTTTGTGATG	637	+
chr7	43780671	43781366	AACATCTGGGATAAAAGTATTCTAGGTC	CGGCAGTTTTCTAAGGGTTTC	696	+
chr7	43780853	43781552	CCATCACAAACACATTTTCTAAGG	GTATGGATCAGGGGGCAAAG	700	+
chr7	43781333	43782012	TGCTCTACCCCTAGAAACCCTTA	CTGGGGAAATGAGGAACTGG	680	+
chr7	43781488	43782167	TTTTGTGTGTCCACGATTCC	GCCTGCGACAGTGGTAAAGA	680	+
chr7	43781997	43782696	TTCCTCATTTCCCCAGATCC	AAAGGAACAAACAGACCCAGCTT	700	+
chr7	43782713	43783381	TTTTTAAATTCCTGGAGTGTTCAG	TGTGTGACCTTAAAAGGGAGGT	669	+
chr7	43782778	43783466	CCCAAATGAGTGTGATTTCTTTC	AAGATTGCAAAAAGCCCCATT	689	+
chr7	43783479	43783937	AATATACCCATTATTTTTGTGAAATACA	GTATTTATGCGGAAAGTGGAG	459	+
chr7	43784022	43784632	ATCCATTTGAGAGGGAGATCA	ATCTCATCACATTTTGGATTATTCG	611	+
chr7	43784688	43785386	TTTTGTAAAAATGGAAACTTCTGA	TCAGCCTGGGACAGAACAT	699	+
chr7	43785035	43785726	GGGCTAAACCATGTGCTCTAA	AGGTCATCTACCCCTTCTCACA	692	+
chr7	43785557	43786253	ATGAGGCCATGTTCCCAGT	AAAGGCGGAGACCTTGAGAC	697	+
chr7	43785706	43786405	GTGAGAAGGGGTAGATGACCTT	CCGCTGGAGGGAACTGTC	700	+
chr7	43786222	43786910	CCACCACCTCTGGTCTCAAG	GGCAAGGAGCCACTATTCAG	689	+
chr7	43786717	43787406	CAAGTCAGTGTGCTCCTTTCA	ACACCTTCAATAGCGGTGGT	690	+
chr7	43786890	43793059	GCTGAATAGTGGCTCCTTGC	AAACCCACAAGGACGTTAGAA	6170	+	deletion #1 (5.7 kb)
chr7	43787222	43787822	CTTCGCAGCACTCCTCTCA	GAAGCCTACCGAACATTTCAAG	601	+
chr7	43788092	43788791	CCTGGAAGCCAAACAGACAG	AGAGGGCGAGCACAAAATC	700	+
chr7	43788547	43789245	ATGTGCATGTGAGCAAGAGG	CAGTTCCTCCCAGCAAAGTC	699	+
chr7	43789060	43789757	CCAGAATGAATGGGGACAG	GGCCTCCCAGACTCCTCTT	698	+
chr7	43789647	43790330	ACAGCCAGACAAGGCTAAACA	GGTAATCAACCCAGGAATTTG	684	+
chr7	43789835	43790487	GGGCCGTTCTTCCTGAGT	TTGCTACACCCAAGACTATCTACA	653	+
chr7	43790075	43790456	CGAGGCTGCATAAGTTGTGA	GTGAGCCTTGCTTTCTGGAC	382	+	deletion #1 (5.7 kb)
chr7	43790462	43791129	TGTGTAGATAGTCTTGGGTGTAGCA	TCACCAACTAACCTCATCTCTCC	668	+
chr7	43791040	43791739	TTGCCCACCTCCTTCATCT	CAGCCATCTTCCTTTGTTCAG	700	+
chr7	43792124	43792812	TTAATCCCCTGACTTCTTAGTTTAAT	CCTCTGTGTGCTACTTTCTCTCAA	689	+
chr7	43792368	43793061	GCAGTTGTTATTAATTAGATCATTTAGC	AAAAACCCACAAGGACGTT	694	+
chr7	43793070	43793646	TAAGGTAAATATGCCTGAAAGCCAGT	CCAGACTTGTGTATCCAACAGC	577	+
chr7	43793433	43794127	TTTGCTGATGGATTGGCTCT	CCCGTTAGTGCTTTCCTTGA	695	+
chr7	43793801	43804190	GGCATGGGAGAGTGACCTAA	GAGCAGCCTGTGAAGGAAAC	10390	+	deletion #2 (9.9 kb)
chr7	43793875	43794559	TGAGATCCACGTTTATACAAGAGTTT	TTGTCTGCTGATTCCAACATC	685	+
chr7	43794083	43794782	GTGCGGCTCAAAACTTCA	TCCCTGAGTGCTTCATTTG	700	+
chr7	43794602	43795168	GGAATAATGGATTAATTGGTAATGAGA	TCAGTTATCATTCCTCCTGTCG	567	+
chr7	43794907	43795587	CCAACATTTTCCAAGTTTCCTC	CCACAAGCCAAGAAGAGAGC	681	+
chr7	43795328	43796024	CAGCAGACACACACAAGGAAA	CTTGATCTCATAGTCCCAGCAG	697	+
chr7	43795858	43796501	CTGAGCTTCTGGATACTCTTCTCTC	CACTGCCATACAGGCCACT	644	+
chr7	43796202	43796901	GAAGGGGGAGAGTACCAGAA	GTGTAGAGCACAGAGACAGGAAGT	700	+
chr7	43796482	43797179	CAGTGGCCTGTATGGCAGT	GGCTCCACGTAACCTCTGTT	698	+
chr7	43797040	43797732	GCTTCTCTTGGCATTTACATTCT	TGTCTAATCAACAGCTCCATTTG	693	+
chr7	43797444	43798126	GGAAGCCTTAGGGGATTTTG	CTCCACCACCCACAGAAACT	683	+	deletion #2 (9.9 kb)
chr7	43797469	43798168	AGGATGCCTTGCTTTAACTTG	GCTCTGTCTCCAATTCCTCAGT	700	+
chr7	43798195	43798894	CCTAAAAAGGAGCCGATGTG	GCTTCTGCTTCCAAAGACCA	700	+
chr7	43798666	43799360	AAGGAGCCCACTGGAGGT	TTCCTCGCGATTGTCTCTG	695	+
chr7	43798836	43799505	ACTTGCTCTCGTGGGTGAAC	GCAGGAATGGTTGTAGCAGAG	670	+
chr7	43800042	43800730	ACCAAAGGGAGGAATGTCCA	CCTATGAACTTGGGGGTCCT	689	+
chr7	43800544	43801240	TCCTTTTGTGTTTTGTCGAAGA	ATGGTTAATGGCCTCGTCTG	697	+
chr7	43801120	43801742	CGCACCAAAACCCTCTCTC	GGGAGTCGGGAAGACACAT	623	+
chr7	43801285	43801946	GTAAATTGCCTTGGGTCACG	ACCTTCCGCAGCCCTCTT	662	+
chr7	43801807	43802506	GCCTCCAGAGCCTGATGTC	GCGTAGAACCACTTGACTTAGC	700	+
chr7	43802235	43802916	CAGTGGCTGAGAGCTTGTCC	GGAGCTATTTGTTGGGAAGA	682	+
chr7	43802470	43803167	CACCGTCTGACACCTGCTAA	TGGTATCTCCCATGCTCTCC	698	+
chr7	43803019	43803692	AGCTCAGGAGGGGGTACTAA	CACAGATGTTCAAAGTCATGCTC	674	+
chr7	43803523	43804185	CGGACCTCCCAGAGCATAC	GCCTGTGAAGGAAACTGACC	663	+
chr7	43804049	43804628	CTTCGAGGGAGCGAGCAC	GCTCTGGGAGTCAAGGGTTA	580	+
chr7	43804309	43805008	TCATGGCTCAGTAAAAGCAGAC	GCTGGAAAGACCGAGTGG	700	+
chr7	43804724	43805373	CCCCCACAGTCTTTACCTG	TTGCCTTCTGCTTATTTCACAA	650	+
chr7	43804989	43805688	CACCACTCGGTCTTTCCAG	CACCACTTGGCGAATACAG	700	+
chr7	43805393	43806027	AAGCCTGTCCTTGTGGCTAT	CTGGAGAGACCAAGCATTTTG	635	+
chr7	43805743	43806399	CCACTACCCTTTCAATCAGACC	CAACGGAACGCCTCAAAG	657	+
chr7	43805981	43806676	GCATCTTGATTTCTCTGCTCCT	AAATAGCTTTGAGGTGTGTTACTGA	696	+
chr7	43806377	43807073	GAGCTCTTTGAGGCGTTCC	GACCCCTGCAAAACTACACAG	697	+
chr7	43806964	43807640	GTTGTCCTTCAGCCCTCCTC	CTGGGTCCTCGCCTAGAAGT	677	+
chr7	43807357	43808056	GTCCCTTCAAGTAAAACCATGA	AAAAAGATGTTCGCCTCTAAGAC	700	+
chr7	43808239	43808704	TCCCTAGAAGAGAAATCTGAAGTAA	CATGTCCCGCACGTTAGTG	466	+
chr7	43808509	43809201	GAAGTGCAAAGCGGGAAC	CAGGAGGAGCCTGGAGATG	693	+
chr7	43808673	43809369	ATGCTGGTGCTGCCACTAAC	GGGGGAGGGATTCAATTCAG	697	+
chr7	43809374	43810072	CCCCCAATTCTTATGTTAAAATCC	CTTGTTAGGTGATCTTGTACAGGTG	699	+
chr7	43809607	43810296	GCACAGCCATGAAACAGATG	GGACAAGGTGGGGTTGTTC	690	+
chr7	43810196	43810884	GATGCAGCCTTAACCTTGTGA	GACTGATGGATGCTTGCTGT	689	+
chr7	43810734	43811428	TCTGCTTGTGCCCTCTCGT	ATTCCATCCTGATGCCCAAG	695	+
chr7	43811260	43811949	AAGGTCATCTGCTGGGAAAA	GAGGAAAAGGAGGGAAGTGG	690	+
chr7	43811721	43812378	ATAACCTTCGTGGGGAAGGA	AATGAAACAAATTTTCTCTGTAATTTGG	658	+
chr7	43812402	43813092	TTTTTGTAATTCTTCTGATTACTTCTC	TCCTCTCCACAACATCAACC	691	+
chr7	43812681	43813345	TTGAACTGATTTAAAAGATAGTAAGTGA	TCCTGGATTAGAGCGGGAAC	665	+
chr7	43813184	43813868	TCTGACTTGAACACATCGAGAAG	AGGCAAGATCCACCAATGAG	685	+
chr7	43813644	43814314	TGCCAGGTTTCTCCACTATACA	AGCAGTAACACCCCAATAGCA	671	+
chr7	43813851	43814456	CATTGGTGGATCTTGCCTGT	CTCAGTTGTATTAGATTAGTGTTGGAGA	606	+
chr7	43814264	43814962	AAACCAACATCTGAGCACTAGG	CGGTGGGTGTCAAAATTACTG	699	+
chr7	43814766	43815364	TGCCTCAATCTGGTGAAAGAC	CCCTCTGGTATAATTTCCCTTCA	599	+
chr7	43815142	43815689	ACACCCACCGACTTTTTATGA	TTAGAGGTTGTGCTAAGGATTATAGC	548	+
chr7	43815565	43816249	TGGGCTAGTGTAAGGGATAAA	TTCTATTAAGGGAAACTGAGACATT	685	+
chr7	43816465	43817074	GGATCCCTGAGATTAGTTTTTG	TCGGATTCCATGACCTTTTC	610	+
chr7	43816768	43817330	CTGGAATCCTGGTAAGCAAT	CCATCATCAGAGGCTGCTAC	563	+
chr7	43817106	43817798	AATAGCGGTGGCGAGTCA	TGCAGATTCCTGAGATATTAGTTACC	693	+
chr7	43817402	43818050	TGATGAATGACTGGTGAAGATGA	CATAAGGAAACCCAAGCCTCT	649	+
chr7	43817864	43818563	AAGCTGGAAACCACAATCCT	CCCACAGGCTCTTCTAAATTCT	700	+
chr7	43817989	43818639	TAGGTCGTTGTTGGCTGGA	AAAAAGCAGGAAGACTGAGTTG	651	+
chr7	43818843	43819421	ATCCGATGTCCCCTCTGT	TTCTGGGTAGGATTGGGTCA	579	+
chr7	43819159	43819769	AGGTCGCTATGTGAGCAAATC	CCATGAATGACTCTTGAAAGCA	611	+
chr7	43819656	43820319	CTACTCTGTAGATTTGCCCATTC	AATGCCACTTCACACCCACTC	664	+
chr7	43820567	43821195	TTTTTGTTGAGTTTGGATACAAGT	GGGCATAAGACTCTGCCTTG	629	+
chr7	43820961	43821587	TGAGATCCACTTTTCCCTAAGTTC	AGTGAGGTGGTTGGAGCAGT	627	+
chr7	43821318	43822013	GGCTTTCCAGGTCTGTGATT	GGCCCTGAGCAGAGGTAAG	696	+
chr7	43821568	43822258	ACTGCTCCAACCACCTCACT	AGGGGCTCCAAGACAACAC	691	+
chr7	43822086	43822784	CTATGTGCTGGGGCATTTTT	GGAAAGCTGGAGGTGTTCAT	699	+
chr7	43822252	43822930	AGCCCCTTGGGTGGAGTTAT	TGACAAGCAGAATTGGAGGA	679	+
chr7	43822756	43823446	CCACTACAGATGAACACCTCCA	GAGTGCCAGGGAGACCAGAA	691	+
chr7	43823487	43824181	AAAAAGTAAATGAAAGGAGAAAGTG	CAATAGATGTATATTCACCCTGTTTGT	695	+
chr7	43823773	43824453	CAGCAATCCTAGGGGAAGG	TTTAAAAGTCATAAAAGAATGTGTGC	681	+
chr7	43824485	43825176	TAAATCAACATTTTTATAGTCTTTGTCC	TGACTTCCCATCATCTCTGC	692	+
chr7	43824879	43825508	AGGACTCTCACCCACTGCAC	GAAAGAGAGAGAACAAGCGACCA	630	+
chr7	43825610	43826233	GAAAGAAAGAAAATAACCTCAGGA	ATCGTTTGGTGATTAACATGG	624	+
chr7	43825852	43826544	GGTCCCTAGTCGTAAGCTGTG	TTGAAAGATTAAAGCCCTTGG	693	+
chr7	43826381	43827065	AAGCTCTCTGTCACGGTTCC	GTCCTCCTGCCTTCCCTTCT	685	+
chr7	43826853	43827526	CTCCCCCAAATGTCAGTGGT	GGAAGCCACCCACCTAGATA	674	+
chr7	43826982	43827681	AAGGAGCTGGTCTACCCAGAG	ATGTGCCAGAAGGGAGAGTG	700	+
chr7	43827506	43828034	CTATCTAGGTGGGTGGCTTCC	ACCATAGGTCCCGGTTTGC	529	+
chr7	43827634	43828304	AGCCTTCTCTTCCACACACC	AGCCAAAAATCAGAGGATGTC	671	+
chr7	43828015	43828710	GGCAAACCGGGACCTATG	TTCCAGCACTACCTAGAAATCCTC	696	+
chr7	43828268	43828953	TGAACCATCTAAATCTGACATCCT	GTCCTCCAGCCAAGCTCTTC	686	+
chr7	43828758	43829456	ACCCGAGCTTCCCTATCCTA	AGTCTTTGAACGGGGCTCCT	699	+
chr7	43829174	43829844	CTTCCTCCTTGGGCCTTAAC	ACCGTCTCCCTTCCCAGT	671	+
chr7	43829442	43830100	CCCCGTTCAAAGACTCAAGA	AGAGTGGGTGCCAGAAAAGA	659	+
chr7	43829954	43830521	CCGACCCCAACAAGACAG	TTGCCCTTCCATGCACCT	568	+
chr7	43830236	43830852	TGGGATACATGAGTGAACAAAAG	ATTCCCGAGGGGGTCTGT	617	+
chr7	43830593	43831239	GAGCATGGGGGATGATGA	CGTTTCCTCACGTCTCCTACA	647	+
chr7	43830949	43831596	CCCCCATCTTAGTTTCTTCATC	CCGCACGGGTCAGCTACT	648	+
chr7	43831206	43831892	GGCCCTGGCTTCCTGTAG	GAAGGTCTAAATGGGGATGGA	687	+
chr7	43831689	43832384	TTGTCTGGAGGAGGGAAATG	GGCTACGGGTTTACAACAGG	696	+
chr7	43831868	43832567	TGCTTCCATCCCCATTTAGA	TGGACGAATGCCCAGAAC	700	+
chr7	43832399	43833098	AGCTGAGAACGCACCTCCT	CACCTCACACTGGCTGGAC	700	+
chr7	43833388	43834012	CGAGCACCATTCTCTGTTAGG	GCCGAGGGTGTTTGGAAGT	625	+
chr7	43833601	43834286	TGGTTTCGCATAAAAGCAC	GGGACCACACCACTGAGGA	686	+
chr7	43834101	43834788	GCGGGGAAGCAAACTGATAC	GTGACCAGTCGCACAGTAGG	688	+
chr7	43834661	43835341	GACGTGTGGCAGGCTCTC	CAGGGGACAGAAGACAGGTG	681	+
chr7	43835064	43835745	CTGCTTGCACACTCCCTTCT	GCCACAGAGCATCGTAACC	682	+
chr7	43835378	43836065	GGCTGAGAAGCGCAACAG	ATCCATTATTTCGCCCTGAA	688	+
chr7	43835778	43836408	GAGGCTGGGTCGCTCTCT	TGCAGTGTGTCCTCAGAATG	631	+
chr7	43835976	43836563	TCCACGTTAATCTCCTCTCACA	CGTGCTTATTTTGCAATTCAGT	588	+
chr7	43836365	43837040	CCTGAAGAAGGTCCCAGATG	CCAAGCCTCCAAAAGGAAC	676	+
chr7	43836581	43837267	TGCTGAAAAATCAAGGGAAGA	GCGCAGAGATAATGAAGTTAAGG	687	+
chr7	43837002	43837688	TCAAAAGGTTGATGGCATTG	ATATATTAACACCAGGCAATTTAGG	687	+
chr7	43838042	43838739	TTTTTGCTGTTTGCTTCTATTATT	TCTCTCTAGCTCTGCTCTCTCTCA	698	+
chr7	43838406	43839074	TGAGAATCCATCCCCAAATC	CCTAACTGTAAAAGAGGCTAAGAAATG	669	+
chr7	43838873	43839532	AGGCAGATGCTTAACTGAGTCAC	TTTTGGGGAGAAAGAATCACA	660	+
chr7	43839048	43839738	CATTTCTTAGCCTCTTTTACAGTTAGG	CCACCTCCACCTCTTATCTCC	691	+
chr7	43839580	43840110	CATGTAACCCAATACCAAATAATGA	CTTGCTGGAAACTTCAACTGG	531	+
chr7	43839929	43840469	TCAAACAAATTAGCAAAAGTCAGAA	TGTCATCACCCTCGTTAATCA	541	+
chr7	43840231	43840812	GGAATAGTTTATGTTGATACAAGGAA	TCTGAACACGCATACTCCAT	582	+
chr7	43840620	43841312	GTGACCATAATACAGCCAAATGA	CTTTATACACCTGAAGATGCACAG	693	+
chr7	43841118	43841754	ACCCTACAATAAGGGGAGAATG	CTGATGAGCGACAGCCTATG	637	+
chr7	43841386	43842058	CCATCCTCCCTAGAAATGTCC	GTCATGGCTGGAATCAAACA	673	+
chr7	43841924	43842554	GTGTGGAGGCATCTGGACAT	CTGGTCAGGAGGGGTAGCA	631	+
chr7	43842361	43843035	GACACCCTCCTGTGGTTAGAA	TCACATAGAGCCCTGGACAA	675	+
chr7	43842802	43843501	GTCAGAGCCAGCCGTGAT	GTGGTGTCCCCGTCAGTTT	700	+
chr7	43843180	43843863	CCATTGTGGTGGTGTTAGGA	TAGCGGGGAGGATGCTAAAT	684	+
chr7	43843748	43844446	CCCTCAACAGAGTGGTGTCC	CTCCAAACCCCTGGCATATC	699	+
chr7	43844271	43844969	CCCAAGTTATTGAAGTCGAGATG	CCTGTGAGGAACCCAGTGAT	699	+
chr7	43844394	43845093	CAGCCCCGTTTTTCATGC	CCTGGCTTTTTACCATGTGC	700	+
chr7	43844948	43845638	ACATCACTGGGTTCCTCACAG	ACCCCTCCCATCTGCTAACT	691	+
chr7	43845524	43846222	TTCCAAGTCCAAGGATCCAG	AGGCCAGTGTCATCCACTC	699	+
chr7	43846328	43847027	ATGCAGGTAGCCCCAGGTA	ACGAGTGGGTTAGTTGTCATT	700	+
chr7	43846784	43847478	GCCCTTGTTCTTTCACCAGT	AGCTCCGGTGTCTTCATCAG	695	+
chr7	43847245	43847939	GTGTTGGGAGATGTGTCGTG	AAAAAGAAGGCCAAGGGAAT	695	+
chr7	43848333	43849012	GGGGTAGATCAGTGTCCCACTC	CCTTCCCGGGTAACAAGTCT	680	+
chr7	43848548	43849197	CTGGATGCCCCTCTGTACTC	GATACCACCCAATGCCCTAA	650	+
chr7	43848985	43849677	AGCCTCCTAGACTTGTTACCC	GGGACAACTGAACACACAACA	693	+
chr7	43849537	43850236	TACAAAGCCCGCCTCCTAC	CCTTAGAGACATTACAGGGCAATAA	700	+
chr7	43849764	43850417	GAAGAGGTTGGGATGCACCT	ATCACCGTTAGCCCCTGAGT	654	+
chr7	43850230	43850929	TCTAAGGTCGGAGTTTTGCTTA	AAGGCAAGAAATGAGGGACA	700	+
chr7	43850912	43851586	TCCCTCATTTCTTGCCTTTG	GGGAGTGGTGGTTAGAGACTG	675	+
chr7	43851418	43852102	AACGCGACTTCCCACCAG	GAGACCCACTTCTCCGCTCT	685	+
chr7	43851563	43852247	TGGCAGTCTCTAACCACCACT	TTCTTTTCTGGGCTGACCTC	685	+
chr7	43852076	43852772	CGGCAGTAGAGCGGAGAA	AGCGTTTTTGAATCTTATCCATTT	697	+
chr7	43852522	43853221	AGACTCCCCAGTCCTCTGAA	CGTATCCATTCCCCAATGTC	700	+
chr7	43852738	43853415	TGATAAGGGGAAAATGGATAAGA	AAACTTGGATGCTGCTCAGAC	678	+
chr7	43853203	43853895	ACATTGGGGAATGGATACGA	CGCCCTTTTGCAGAGGTAT	693	+
chr7	43853923	43854598	GTTTGTACCGACTGTGGATGAG	AGCCTCCTGCTTCTGTCCT	676	+
chr7	43854359	43854884	GTGCCAGCCCAGAACCTT	AGGGCAAGTGTTGAAAGGAC	526	+
chr7	43854531	43855218	CCCAATAGCCTGACAACTGAA	CAGCCTCTGAAACTCACCCTTA	688	+
chr7	43855107	43855794	ATTTGAGTCCCCTGGCATTA	CAGTAAGCCTGATCCCACCA	688	+
chr7	43855494	43856186	AGGTTTGGGGAAGAGCAGTC	GTCAAAGGGCAGTTCGGTAG	693	+
chr7	43855721	43856420	CCAGAGCCCCAGCAAATG	GTAGCGGCGAACAAAGTCAG	700	+
chr7	43856165	43856844	TTCTACCGAACTGCCCTTTG	CTCGTCCCTCCAGCCAGAT	680	+
chr7	43856387	43857083	TTTCTATTAACCGGCTGACTTTG	GCCTCCCAAACAGGATCA	697	+
chr7	43856919	43857613	CCTCCTGCTCATCTCACCAC	GTACCCAACGCCAACGAGAG	695	+
chr7	43857313	43857989	GCCTTTGTCCTATAAAAGAGTGA	GGTGGCTGATCCCTGACAT	677	+
chr7	43857628	43858303	CCAGCCTATTTCCAGATTTTTCTGGTTG	TGATAACATTCCTCCGACCATCTTTCAG	676	+	M13-tag
chr7	43858102	43858932	GTCGGGCGGTAATGGTGT	TGAGAATTTGCTAAGAACACAGG	831	+
chr7	43858771	43859465	GATTTCTATTTCAACCAAACTCC	AAAAGAAGATCGGCTGCAC	695	+
chr7	43859318	43859917	TCAGTGTAAGAATGAAGCCACAGTGGTG	TGGGAAGAACTCAATCAGTGTAGCCAGT	600	+	M13-tag
chr7	43859648	43860331	AACATTTGTGCATAGACCCCACTGATGT	TGATATGTAGCACTGGCCAATTTCTGTG	684	+	M13-tag
chr7	43859791	43860246	TCTCAATCCCAGGTCCAG	CAGAGATGCCATGAGAATCAG	456	+
chr7	43860025	43860700	TTGCCCAAAGCCATCCAT	CCACGTCCCACCTACATCA	676	+
chr7	43860450	43861148	GGATTAGGGAAGACGGAATG	GGGCTACAGGCAGTCAGAA	699	+
chr7	43860626	43861305	GGTGAGCTAATGCCTGAACC	CTGCTGCCTACACCTCTCCT	680	+
chr7	43861125	43861650	CCTGCTTCTGACTGCCTGTA	GCCCCCTGGAGTAAAGTGA	526	+
chr7	43861316	43862007	AAGGGGGCCAGATGTGTT	TGCAGAGGTTGGAATGAAAG	692	+
chr7	43861802	43862501	CGGGATATTGTTCTGGGTCA	GCCCTGCTTTCAAGGGACT	700	+
chr7	43862348	43862872	TCCCATTATTCTGCGTCAGG	ACAACTTCCCCAAGAGAGAGG	525	+
chr7	43862452	43863146	CTCATTGCCCATTTCCTGTC	CCTCATCCTGCCCTAAAGGT	695	+
chr7	43862852	43863520	CCTCTCTCTTGGGGAAGTTG	CACTGCGGGAAAACTAATAAGG	669	+
chr7	43863080	43863726	GCCTTCAGGTGATTGGAGAG	CTGTCAATGGAGGGGGTCT	647	+
chr7	43863498	43864197	CCCTTATTAGTTTTCCCGCAGT	AGATGGGGATCTTGGAGAGG	700	+
chr7	43863692	43864386	AAAATGCTCATCTGCAAGACC	GCATCCCACCTCCAGACTTA	695	+
chr7	43864109	43864756	TCCTTTGCCTGGGGATTG	ACCTCGGATGGAAAGCAGT	648	+
chr7	43864319	43864987	GTAACATAGGAGGTGCTCAAAGT	GCAGACTTGCTGAGGATGG	669	+
chr7	43864816	43865505	TGAGGATGTTGTGGAGTGAAG	AAAAGCCCAGACGGATGATA	690	+
chr7	43865209	43865864	TGATGGTACAGCATTCCCTCT	CCGCTCTTCACAGCCTCAC	656	+
chr7	43865486	43866066	TATCATCCGTCTGGGCTTTT	GGCCAGGTAAACGAGTGAAG	581	+
chr7	43865807	43866500	GGTTGTGGGCCTATGTGTG	TCTTTGCCTCATCCTGATCC	694	+
chr7	43866117	43866807	CCGGAGCATTAAAAGGATTG	CTGGGGACCAAGGGCTACT	691	+
chr7	43866675	43867373	CATGGCCTACAGAAAGACCAG	AGCGAGTGAGGGGTTCTAGG	699	+
chr7	43867095	43867791	CTGCCTCTTGTGCCTTACG	CAGGTGAAAGCCTACAGGTGA	697	+
chr7	43867306	43868004	CCCAGCTTGTCACTGGTGTA	TGTTGCCTTGGTGAATTGTC	699	+
chr7	43867722	43868414	AGCCTCTATCCTGGTGAGTCC	ACACTGCTAGGTGGTGGGTAG	693	+
chr7	43867929	43868585	TCAACGTCCATCCAGTGTGT	AATGGCTTTCAGGAGTCACAG	657	+
chr7	43868413	43869103	GTGACATCTGTGAATGGATTTCT	TTGATCTTGCCCACAAGGTA	691	+
chr7	43868905	43869549	CAATGCCAGAGAAGGAGTCA	AGAAGAGGACAAGACAGAAACACA	645	+
chr7	43869101	43869800	CAAGTGCAAACCCCTCCAC	CCACTATTCCGATCTCACACC	700	+
chr7	43869675	43870347	CCAGGAGTCACAGGACATTTT	ATGGTTTGGGGAGCCACT	673	+
chr7	43870060	43870745	TTGGGGGCAGCTTAGATAAA	TAGAGCCACACCCTCCTGAA	686	+
chr7	43870330	43871029	AGTGGCTCCCCAAACCAT	TGAGAACCTACTGTGTGTCTGG	700	+
chr7	43870895	43871593	TCCAGATGAGCAAACTGAGGTA	CCTGCTAGGAAGCATGTGTG	699	+
chr7	43871159	43871858	TCCCTTTAAATCAGGCTGGTAA	AAAAAGAATCAGCTGCCTAGC	700	+
chr7	43872061	43872562	AGCTAATTCTTGCAGAGATTCTGTACC	ACAAAGAGGTCCCCAGATCC	502	+
chr7	43872083	43872758	GTACCAGGACATCTTGAGCA	GTGAGGACCAACACCTACAGAG	676	+
chr7	43872480	43873179	GCAATCCCACTTCCCACTTA	GGCCTCTCTCAACTCAGCTC	700	+
chr7	43872679	43873375	CCCTTGGTTCCCTACTGCTTA	AACCTTGCTTGGGGATCTG	697	+
chr7	43873152	43873833	CAAGAGCAGAGCTGAGTTGAGA	TCATTGCTTCTGTATCGCTTTT	682	+
chr7	43873302	43873963	CCCATTTGATACTGATACACATTCA	TCATTACCTCCCCTATGACACC	662	+
chr7	43873806	43874505	GTGGGAAAAAGCGATACAGAA	AATCCACCAGCATAACTGACC	700	+
chr7	43874210	43874909	GGCTGGTTTATATTTGAGAAGTGG	CTACATGGGGAACCCTGAAA	700	+
chr7	43874492	43875138	TATGCTGGTGGATTTGAGGA	AGAGCTGATAAATGGAGCCTTCT	647	+
chr7	43874875	43875543	TGCAGGAGTTTGTGCTTTCA	TAGGCTTCCATGACTGACCA	669	+
chr7	43875215	43875836	ACCAAGTAAGTGTCTTTGGAACA	AAAAATTGAAGATGTGTGGTAATGA	622	+
chr7	43875854	43876458	TATGCCCAATGTGGGTCTTG	AAACCATTGGCTGGGAAATA	605	+
chr7	43876307	43876970	AGTTCTGGGGTCTTTGAAGGT	GATTCCAGCAAGCCAAGGT	664	+
chr7	43876835	43877488	AGTGAACTACAGGAGGGCCATA	AAAGAATACATTGGCACAGAATCA	654	+
chr7	43877232	43877864	GCCCGATTAAGTTCAGGAATG	ATCCCCAATCACCTGTTTCA	633	+
chr7	43878665	43879353	TTGTGGTTTTGATTTGTATTTCA	TTGTTTGTTTCTTGTTGTTGAGT	689	+
chr7	43878766	43879465	TTCATGTCTGATTTCAGGTTG	GGAAAGGGGTTGATAAGCAG	700	+
chr7	43879274	43879973	TGCAAATGACGTATCAGATGAA	CTTGCTTTGTGGGATTACCC	700	+
chr7	43879846	43880544	GGTTTCTGCTGTGGGAAGAT	GGGCCATTTTTCTGTCTGTC	699	+
chr7	43880392	43881091	GGTTGAAGGTAGAGGGGAGTG	GTGAGGATTGTGAGCAGGAG	700	+
chr7	43880792	43881484	CTCTTGTCACCTGGCTTTCA	TCGAGAGGACAGAAGCAGAC	693	+
chr7	43881052	43881748	GGGTGCAGGGTCTACCAG	GGGCAAGGAGGATGGATAA	697	+
chr7	43881614	43882146	GATGGGATGGAGGGTCACT	CCCCAGGGCACTTCTCAAT	533	+
chr7	43881911	43882431	AAAACGTCACTAAACAGAGCCTTT	CCTTGAATAAAGCAGATTATAGCTCA	521	+
chr7	43882205	43882836	ACGGGAGTGGGGATTTTAAG	CGCTTTGGTAATGACAACAAAT	632	+
chr7	43882658	43883353	GTTATTCACATTTAGTCAGGTGTTTT	TGCTTTAGGGCACAATGG	696	+
chr7	43883180	43883867	TAGAAACAGCCCAGCCATCT	CACCACTACCACCCCACTTT	688	+
chr7	43883489	43884160	GCCTTTGCTTTCCCTTTACA	CCAAGGATTCAGCTATCACATACTT	672	+
chr7	43884035	43884649	AAAGGGGTTTCCAGGGTCTA	ACATTAGGCTTGGTGCCTGT	615	+
chr7	43884403	43885001	AACATTGGAACCACAACCCTA	TTTTCTTACTATGCTGCTGAATGC	599	+
chr7	43884630	43885246	ACAGGCACCAAGCCTAATGT	TTTGTAAATGCTCCTTTTGGAGT	617	+
chr7	43884976	43885553	TTGCATTCAGCAGCATAGTAAGA	TGACCTTGCACTCTGTGACC	578	+
chr7	43885246	43885938	AAAGCCTACAGATCACATCGTACTT	TTTGGCTACTGTGGTTCTATATGC	693	+
chr7	43885783	43886402	TTTATGGGTTGGAAGCCTTAGT	AGGCATCCCTGGTGGTGTT	620	+
chr7	43887003	43887702	GGATGGCAAATAAGCACACA	GGCAACCATAATCAGGATAGAGA	700	+
chr7	43887603	43888297	GTGCTTAGGGCTGGAAAGAA	TCTGAATCTAGGGGAAACCTCTC	695	+
chr7	43887944	43888473	CTTACTGTGTTGCTGGATGG	GGTGTGGGGTAGATGGGGTA	530	+
chr7	43888274	43888971	AGAGAGGTTTCCCCTAGATTCA	TGCAGCCACTCTGAAAACTG	698	+
chr7	43888866	43889565	CTGTATCTTTGGGGTAAATTCTCA	TACCAGCCATGAAAGCAAGA	700	+
chr7	43889456	43890065	CTTGACTTCATGTAAGATAAATATACGG	GGATAGTTCGGAGAGGAGGAA	610	+
chr7	43889799	43890490	CTCTAATATGGAAGCATTCAGTTTG	CCCATGTGATGTGGATTTCTT	692	+
chr7	43890023	43890721	AGGCTGACCTCTTGTTCACTT	TTAATGCTACCCATCCCTCCT	699	+
chr7	43890604	43891263	GGAGATGCTTGGGAAATCTG	CTCATGTGCAGTGGGGACT	660	+
chr7	43891064	43891719	GCTGCTTGCGGGTATGAG	TTGCAGTTGCTGGAGTTTTG	656	+
chr7	43891434	43892128	GCTTGGTTGTGCTGTCTTGA	AAAAAGAAATTGTCACAGATCACTA	695	+
chr7	43892134	43892832	TTTTTCTTCTCTATGACCCTGAC	CAGTTGGGTGGGAGAAGGTA	699	+
chr7	43892449	43893132	GGTATGCTTTCTAACTCCAGGTC	AGACATTTGGACAATCTGCTGT	684	+
chr7	43892843	43893408	GCACTCGTTCAGGTTAGGGATA	GCGATCCACACAGCCTATCTT	566	+
chr7	43893048	43893718	ATGTCAGCACTTCCCATTGA	AAAATGCAACCCAAGCAGTC	671	+
chr7	43893541	43894228	GGGGCCATTGTTAGTTGGTTA	AGAATGAAGCCCGAATATGG	688	+
chr7	43894088	43894768	CCTGTGGCAGTGGAAGAGTT	TCAATGGAATCGAGAGATAACAGA	681	+
chr7	43894576	43895145	CCTCCATAGCTGACTCTTTGAAC	AGGGAGCCCCAGACTTCTT	570	+
