# Supplementary material for: Derived variants at six genes explain nearly half of size reduction in dog breeds
Source: HighWire-hosted journal article supplement (doi:10.1101/gr.157339.113), 2013-09-11
Supplement: Supplemental_TableS6.xlsx [file Supplemental_TableS6.xlsx]

## Sheet: Table_S6
Supplemental Table S6. Genotyping results of the 500 dogs from 93 breeds at the best size-associated markers.
The dogs randomly selected for some analyses are indicated (two males and two females per breed).
Sample ID	Sex	Genotyping results								Subset of dogs randomly selected	Individual weight (lbs)
		IGF1	GHR(1)	SMAD2	STC2	HMGA2	IGF1R	GHR(2)	IGF1 SINE
CHIH_01	male	AA	AA	DD	AA	AA	GG	TT	II	*
CHIH_02	male	AA	AA	DD	AA	AA	AG	TT	II	*
CHIH_03	female	AA	AA	DD	AA	AA	AG	TT	II	*
CHIH_04	female	AA	AA	DD	AA	AA	AG	CT	II
CHIH_05	male	AA	AA	DD	AT	AA	AG	CT	II		4
CHIH_06	female	AA	AA	ID	AA	AA	AG	TT	II	*	3.75
CHIH_07	female	AA	AA	DD	AA	AA	AA	TT	II
MALT_01	female	AA	AA	DD	AA	AA	GG	CT	II	*
MALT_02	female	AA	AA	ID	AA	AA	GG	TT	II	*
MALT_03	male	AA	AA	DD	TT	AA	GG	CC	II	*
MALT_04	male	AA	AA	DD	AA	AA	GG	CT	II	*
POM-_01	male	AA	AA	DD	AT	AA	GG	CT	II	*
POM-_02	male	AA	AA	ID	AA	AA	AA	CC	II	*
POM-_03	female	AA	AA	DD	AT	AA	AG	CT	II	*
POM-_04	female	AA	AA	DD	AA	AA	GG	TT	II	*
TYFX_01	male	AA	AG	ID	AA	AA	GG	CC	II	*
TYFX_02	female	AA	GG	DD	AA	AA	GG	CC	II	*
TYFX_03	male	AA	AG	DD	AA	AA	GG	CC	II	*
TYFX_04	female	AA	AG	ID	AA	AA	GG	CC	II	*
YORK_01	male	AA	AG	DD	AA	AA	AA	CT	II	*
YORK_02	female	AA	AG	DD	AA	AA	AG	CC	II	*
YORK_03	male	AA	AA	DD	AA	AA	AA	CT	II	*	11
YORK_04	female	AA	AA	DD	AA	AA	AA	CC	II	*
PAPI_01	female	AG	AG	ID	AT	AG	AG	CC	ID	*
PAPI_02	male	AA	AG	DD	AA	GG	GG	CC	II	*
PAPI_03	female	AA	AA	DD	AT	GG	AA	CC	II	*	6
PAPI_04	male	AA	AG	DD	AA	GG	GG	CC	II	*	6
TPOO_01	female	AG	AG	DD	AT	AG	AG	CC	ID	*
TPOO_02	female	AA	AG	ID	TT	AA	AA	CC	II	*	7
TPOO_03	female	AA	AA	DD	AT	AG	AA	CT	II		6.75
TPOO_04	male	AA	AA	DD	TT	AA	AA	CC	II	*	8
TPOO_05	male	AA	AA	DD	TT	AA	AG	CC	II	*	8
TPOO_06	male	AA	AA	ID	TT	AA	AA	CC	II		7
AFFN_01	female	AA	AA	DD	AT	AG	AA	TT	II	*
AFFN_02	male	AA	AA	ID	AA	AA	AA	TT	II	*
AFFN_03	male	AA	AA	ID	AA	AA	AA	TT	II	*
AFFN_04	female	AA	AA	DD	AA	AA	AA	TT	II	*
CHIN_01	male	AG	AA	DD	AA	AA	GG	CT	ID	*
CHIN_02	female	AA	AA	DD	AA	AA	GG	CT	II	*
CHIN_03	male	AA	AA	DD	AT	AA	AG	TT	II	*
CHIN_04	female	AA	AA	DD	AA	AA	GG	TT	II	*
CRES_01	male	AA	GG	DD	AT	AA	AG	CC	II	*
CRES_02	female	AA	AG	DD	AT	AA	GG	CC	II	*
CRES_03	female	AA	GG	ID	AT	AA	GG	CC	II	*
CRES_04	male	AA	GG	ID	TT	AA	GG	CC	II	*
BRUS_01	male	AA	AA	DD	AA	AA	GG	TT	II	*
BRUS_02	female	AA	AA	DD	AA	AA	GG	TT	II	*
BRUS_03	male	AA	AA	DD	AA	AG	GG	TT	II	*
BRUS_04	female	AA	AA	DD	AA	AA	GG	TT	II	*
MPIN_01	female	AA	GG	DD	AT	AA	AG	CC	II	*	8.5
MPIN_02	female	AA	AG	DD	AA	AA	GG	CC	II	*	10
MPIN_03	male	AA	AA	DD	AA	AA	AG	CT	II	*	9
MPIN_04	male	AA	AG	II	AA	AA	AA	CC	II	*	7
MPIN_05	female	AA	AA	DD	AT	AA	AA	CC	II		7.5
BICH_01	female	AG	AA	DD	AA	AA	GG	CC	ID	*	11.2
BICH_02	female	AA	AA	DD	AT	AG	GG	CC	II	*	12
BICH_03	male	AG	AA	DD	AA	AA	GG	CC	ID	*
BICH_04	male	AG	AA	ID	AT	AA	AG	CC	ID	*
BICH_05	female	AG	AG	DD	AA	AA	GG	CC	ID
PEKE_01	male	AA	AG	DD	AA	AA	GG	CC	II	*
PEKE_02	male	AA	AG	DD	TT	AA	GG	CC	II	*	11
PEKE_03	female	AA	AA	DD	AA	AA	GG	CT	II	*	11
PEKE_04	female	AA	AA	DD	AA	AA	GG	CC	II	*	11
SILK_01	male	AA	AG	DD	TT	AA	AG	CC	II	*	12.5
SILK_02	male	AA	AA	DD	AT	AA	GG	CT	II	*
SILK_03	male	AA	AA	DD	AA	AA	AG	CC	II
SILK_04	female	AA	AA	DD	AA	AA	AG	CC	II	*
SILK_05	female	AA	AA	DD	AT	AA	GG	CC	II	*
SILK_06	female	AA	AA	ID	AT	AA	GG	CC	II		10
ITGY_01	male	AA	GG	DD	AA	AA	AG	CC	II	*
ITGY_02	male	AA	GG	DD	AT	AG	AG	CC	II	*
ITGY_03	female	AA	GG	DD	AA	AG	GG	CC	II	*	10.5
ITGY_04	female	AA	GG	DD	AA	AA	GG	CC	II	*	12.3
ITGY_05	female	AA	GG	DD	TT	AA	AG	CC	II
NOWT_01	male	AG	AA	DD	AA	AA	GG	CC	ID	*	15.3
NOWT_02	male	AA	AA	DD	TT	AA	AG	CC	II	*
NOWT_03	female	AA	AG	ID	AT	AA	GG	CC	II	*
NOWT_04	female	AA	AG	ID	TT	AA	GG	CC	II	*	10
HAVA_01	female	AA	AA	ID	AA	AG	GG	TT	II	*	12.3
HAVA_02	male	AG	GG	DD	AT	AA	GG	CC	ID	*
HAVA_03	female	AA	AA	II	AT	AG	GG	CC	II	*
HAVA_04	male	AA	AA	DD	AT	AG	GG	CC	II	*	13
HAVA_05	female	AG	AA	ID	AT	AA	GG	CT	ID		11.1
HAVA_06	male	AA	AG	DD	AA	AG	GG	CC	II		14
SHIH_01	female	AA	AA	DD	AA	AA	GG	CC	II	*
SHIH_02	male	AA	AA	DD	AA	AA	GG	CC	II	*
SHIH_03	male	AA	AA	DD	AA	AA	GG	CT	II	*
SHIH_04	female	AA	AA	DD	AA	AA	GG	CC	II	*
BORT_01	female	AA	AA	DD	TT	AA	GG	CC	II	*
BORT_02	male	AA	AA	DD	TT	AA	GG	CC	II	*
BORT_03	female	AA	AA	DD	TT	AA	GG	CC	II	*
BORT_04	male	AA	AA	DD	TT	AA	GG	CC	II	*
CAIR_01	female	AG	AA	II	TT	AA	GG	CC	ID	*
CAIR_02	female	AA	AA	ID	TT	AA	GG	CC	II	*	15.4
CAIR_03	male	AA	AA	DD	AT	AA	GG	CC	II	*
CAIR_04	male	AA	AA	DD	AT	AA	GG	CC	II	*
MSNZ_01	male	AA	AG	DD	TT	GG	GG	CC	II	*	13.5
MSNZ_02	female	AA	AA	DD	TT	GG	GG	CC	II	*	14.5
MSNZ_03	male	AA	AG	DD	TT	GG	GG	CC	II	*	18.5
MSNZ_04	female	AA	AA	DD	AT	GG	GG	CC	II	*
CKCS_01	female	AA	AA	ID	AA	GG	GG	TT	II	*	17
CKCS_02	female	AA	AA	DD	AA	GG	GG	TT	II	*	14
CKCS_03	male	AA	AA	ID	AA	GG	GG	TT	II	*
CKCS_04	male	AA	AA	ID	AA	GG	GG	TT	II	*
PUG-_01	male	AA	AG	DD	AA	AA	GG	CC	II	*
PUG-_02	female	AA	AA	DD	AA	AA	GG	CC	II	*
PUG-_03	female	AA	AA	DD	AA	AA	AA	CC	II	*
PUG-_04	male	AA	AA	DD	AA	AA	GG	CC	II	*
MPOO_01	female	AA	AA	ID	TT	AG	AA	CC	II	*
MPOO_02	male	AA	GG	ID	TT	AA	AG	CC	II	*	14
MPOO_03	female	AA	AG	DD	TT	AA	AG	CC	II	*	15
MPOO_04	male	AA	AA	II	TT	AA	GG	CC	II	*
BOST_01	female	AA	AA	ID	AA	GG	GG	CC	II	*
BOST_02	female	AA	AG	II	TT	GG	GG	CC	II	*
BOST_03	female	AG	AA	DD	AA	GG	GG	CC	ID
BOST_04	male	AA	AA	ID	AA	GG	GG	CC	II	*
BOST_05	male	AA	AA	II	AT	GG	GG	CC	II	*
AUST_01	male	AA	AA	DD	AA	AA	GG	CC	II	*	19.2
AUST_02	male	AA	AA	II	AT	AA	GG	CC	II	*	19
AUST_03	female	AA	AA	DD	AT	AA	GG	CC	II	*	16
AUST_04	male	AA	AA	ID	AT	AA	GG	CC	II		21.5
AUST_05	female	AA	AA	DD	TT	AA	GG	CC	II	*	17
AUST_06	female	AA	AA	II	AA	AA	GG	CC	II		22
WHWT_01	female	AG	AA	ID	TT	AA	GG	CC	ID	*
WHWT_02	female	AA	AA	II	AT	AA	GG	CC	II	*
WHWT_03	male	AA	AA	II	TT	AA	GG	CC	II	*
WHWT_04	male	GG	AA	ID	TT	AA	GG	CC	DD	*
SCOT_01	male	AA	AG	II	AA	GG	GG	CC	II	*
SCOT_02	female	AA	AA	II	AA	GG	GG	CC	II	*
SCOT_03	female	AA	GG	II	AA	AG	GG	CC	II	*	20
SCOT_04	female	AA	GG	II	AA	GG	GG	CC	II
SCOT_05	male	AA	GG	II	AA	GG	GG	CC	II	*
SSHP_01	female	AG	GG	II	TT	GG	GG	CC	ID	*	20
SSHP_02	male	AG	AA	II	TT	GG	AG	CC	ID	*	23.8
SSHP_03	female	AG	AA	II	TT	AG	GG	CC	ID	*
SSHP_04	female	GG	AG	II	TT	GG	GG	CC	DD
SSHP_05	male	GG	AA	II	TT	AA	GG	CC	DD	*	22
BSJI_01	female	AA	GG	II	TT	GG	GG	CC	II	*
BSJI_02	male	AA	GG	II	TT	GG	GG	CC	II	*
BSJI_03	female	AA	AG	II	TT	GG	GG	CC	II	*
BSJI_04	male	AA	GG	II	TT	GG	GG	CC	II	*
BSJI_05	female	AA	GG	II	TT	GG	GG	CC	II
BEAG_01	female	AA	AG	II	TT	GG	GG	CC	II	*
BEAG_02	female	AA	AG	II	TT	GG	GG	CC	II	*
BEAG_03	male	AA	AG	II	TT	AG	GG	CC	II	*
BEAG_04	male	AA	AG	II	TT	GG	GG	CC	II	*
BEAG_05	male	AA	GG	II	TT	GG	GG	CC	II
FBUL_01	female	AA	GG	ID	TT	GG	GG	CC	II	*	22
FBUL_02	male	AA	GG	II	AT	GG	GG	CC	II	*
FBUL_03	female	AA	AG	II	AT	GG	GG	CC	II	*
FBUL_04	male	AA	GG	II	AT	GG	GG	CC	II	*
FBUL_05	female	AA	AA	II	TT	GG	GG	CC	II
PEMB_01	female	GG	AA	DD	AA	GG	GG	CC	DD	*
PEMB_02	female	AG	AA	ID	TT	GG	GG	CC	ID	*
PEMB_03	male	AG	AA	ID	AT	GG	GG	CC	ID	*
PEMB_04	female	AG	AA	ID	TT	GG	GG	CC	ID
PEMB_05	male	GG	AA	DD	AT	GG	GG	CC	DD	*
PEMB_06	male	GG	AA	DD	AT	GG	GG	CC	DD		29
MBLT_01	female	AG	GG	II	TT	GG	GG	CC	ID	*
MBLT_02	female	AA	GG	II	TT	GG	GG	CC	II	*
MBLT_03	male	AA	GG	II	TT	AG	GG	CC	II	*
MBLT_04	male	AA	GG	II	TT	GG	GG	CC	II	*
WHIP_01	female	GG	GG	DD	AA	GG	GG	CC	DD	*	27
WHIP_02	female	AG	GG	ID	TT	GG	GG	CC	ID	*	36
WHIP_03	male	GG	GG	ID	TT	GG	GG	CC	DD	*
WHIP_04	male	GG	GG	DD	AA	GG	GG	CC	DD	*	39
ECKR_01	male	AA	AA	II	TT	GG	GG	CC	II	*	29
ECKR_02	female	AG	AG	II	TT	GG	GG	CC	ID	*
ECKR_03	male	AA	AG	ID	TT	GG	GG	CC	II	*
ECKR_04	female	AA	AG	II	TT	GG	GG	CC	II	*
ECKR_05	male	AA	AA	II	TT	GG	GG	CC	II
STAF_01	male	AA	AG	II	TT	GG	GG	CC	II	*	41
STAF_02	male	AA	GG	II	TT	GG	GG	CC	II	*	37
STAF_03	male	AA	GG	II	TT	GG	GG	CC	II
STAF_04	female	AA	GG	II	TT	GG	GG	CC	II	*
STAF_05	female	AA	GG	II	TT	AG	GG	CC	II	*
CARD_01	female	GG	GG	ID	AA	GG	GG	CC	DD	*	38
CARD_02	female	GG	GG	ID	AA	GG	GG	CC	DD	*
CARD_03	male	GG	AG	DD	TT	GG	GG	CC	DD	*	31.9
CARD_04	male	GG	AA	ID	AT	GG	GG	CC	DD	*	40.6
CARD_05	male	GG	GG	ID	TT	GG	GG	CC	DD		36.8
SSNZ_01	female	AA	GG	DD	TT	GG	GG	CC	II	*
SSNZ_02	female	AA	GG	II	TT	GG	GG	CC	II	*
SSNZ_03	male	AG	AG	DD	TT	GG	GG	CC	ID	*
SSNZ_04	female	AA	GG	ID	TT	GG	GG	CC	II
SSNZ_05	male	AA	GG	DD	TT	GG	GG	CC	II	*
SSNZ_06	male	AA	GG	DD	TT	GG	GG	CC	II
BRIT_01	female	AA	GG	ID	AT	GG	GG	CC	II	*
BRIT_02	female	GG	GG	ID	TT	GG	GG	CC	DD	*
BRIT_03	female	AG	AG	ID	TT	GG	GG	CC	ID
BRIT_04	male	AA	AG	II	TT	GG	GG	CC	II	*
BRIT_05	male	AG	GG	ID	TT	GG	GG	CC	ID	*
GLEN_01	male	AG	GG	II	TT	GG	GG	CC	ID	*
GLEN_02	male	AG	AG	ID	TT	GG	GG	CC	ID	*
GLEN_03	female	GG	GG	II	TT	GG	AG	CC	DD	*
GLEN_04	female	AA	GG	II	TT	GG	GG	CC	II	*
GLEN_05	female	AG	GG	II	TT	GG	GG	CC	ID
PBGV_01	male	AG	GG	ID	TT	GG	GG	CC	ID	*
PBGV_02	female	GG	GG	II	TT	GG	GG	CC	DD	*
PBGV_03	female	AG	GG	DD	TT	GG	GG	CC	ID	*
PBGV_04	male	AG	GG	ID	AT	GG	GG	CC	ID	*
BORD_01	female	AA	AG	ID	AT	GG	GG	CC	II	*	32
BORD_02	male	AG	AG	II	TT	GG	GG	CC	ID	*
BORD_03	female	AG	AA	ID	AT	GG	GG	CC	ID	*
BORD_04	male	GG	GG	II	AT	GG	GG	CC	DD	*
BORD_05	male	AG	AG	II	AT	GG	GG	CC	ID
SUSX_01	male	AA	GG	II	TT	GG	AA	CC	II	*
SUSX_02	female	AA	GG	II	TT	GG	AG	CC	II	*	40
SUSX_03	female	AA	GG	II	TT	GG	GG	CC	II	*	42
SUSX_04	male	AA	GG	II	TT	GG	GG	CC	II	*
SALU_01	female	GG	GG	II	TT	GG	GG	CC	DD	*	45
SALU_02	male	GG	GG	II	TT	GG	GG	CC	DD	*	48
SALU_03	female	GG	GG	II	TT	GG	GG	CC	DD	*	48
SALU_04	male	GG	GG	II	TT	GG	GG	CC	DD	*	58.2
ESSP_01	male	AG	GG	II	TT	GG	GG	CC	ID	*
ESSP_02	female	AA	GG	II	TT	GG	GG	CC	II	*
ESSP_03	male	AG	GG	II	TT	GG	GG	CC	ID	*
ESSP_04	female	AA	GG	II	TT	GG	GG	CC	II	*
HUSK_01	male	GG	GG	II	TT	GG	GG	CC	DD	*
HUSK_02	female	GG	GG	II	TT	GG	GG	CC	DD	*
HUSK_03	female	GG	GG	II	TT	GG	GG	CC	DD	*
HUSK_04	female	GG	GG	II	TT	GG	GG	CC	DD
HUSK_05	male	GG	GG	II	TT	GG	GG	CC	DD	*	51
IBIZ_01	female	GG	GG	II	TT	GG	GG	CC	DD	*
IBIZ_02	female	AG	GG	II	TT	GG	GG	CC	ID	*
IBIZ_03	male	GG	GG	II	TT	GG	GG	CC	DD	*
IBIZ_04	female	GG	GG	II	TT	GG	GG	CC	DD
IBIZ_05	male	GG	AA	ID	TT	GG	GG	CC	DD	*
BASS_01	female	AG	GG	ID	TT	GG	GG	CC	ID	*
BASS_02	female	GG	GG	II	TT	GG	GG	CC	DD	*	50
BASS_03	female	AG	GG	ID	TT	GG	GG	CC	ID
BASS_04	male	AG	GG	II	TT	GG	GG	CC	ID	*
BASS_05	male	GG	AG	ID	TT	GG	GG	CC	DD	*	60
DALM_01	female	AG	AG	ID	TT	GG	GG	CC	ID	*
DALM_02	male	AA	GG	II	AT	GG	GG	CC	II	*
DALM_03	male	AG	AG	II	TT	GG	GG	CC	ID	*
DALM_04	female	AG	GG	II	TT	GG	GG	CC	ID	*
SHAR_01	female	GG	GG	II	TT	GG	GG	CC	DD	*
SHAR_02	female	GG	GG	II	TT	GG	GG	CC	DD	*
SHAR_03	male	AG	GG	II	TT	GG	GG	CC	ID	*
SHAR_04	male	AA	GG	ID	TT	GG	GG	CC	II	*
SHAR_05	female	GG	GG	II	TT	GG	GG	CC	DD
AFGH_01	male	GG	GG	II	TT	GG	GG	CC	DD	*	65
AFGH_02	female	GG	GG	II	TT	GG	GG	CC	DD	*	45
AFGH_03	female	GG	GG	II	TT	GG	GG	CC	DD	*	42
AFGH_04	male	GG	GG	II	TT	GG	GG	CC	DD	*
IWSP_01	male	GG	GG	II	TT	GG	GG	CC	DD	*
IWSP_02	male	GG	GG	II	TT	GG	GG	CC	DD	*
IWSP_03	female	GG	AG	II	TT	GG	AG	CC	DD	*
IWSP_04	female	GG	GG	II	TT	GG	AG	CC	DD	*
IWSP_05	female	GG	GG	II	TT	GG	GG	CC	DD
IWSP_06	male	GG	GG	II	TT	GG	AG	CC	DD
BULD_01	male	AA	GG	II	TT	GG	GG	CC	II	*
BULD_02	female	AA	GG	ID	TT	GG	GG	CC	II	*
BULD_03	male	AA	GG	II	TT	GG	GG	CC	II	*
BULD_04	female	GG	GG	ID	TT	GG	GG	CC	DD	*	52
BULD_05	male	AA	GG	II	TT	GG	GG	CC	II		60
BULD_06	female	AG	GG	ID	TT	GG	GG	CC	ID
CHOW_01	male	AG	GG	II	TT	GG	GG	CC	ID	*
CHOW_02	female	GG	GG	II	TT	GG	GG	CC	DD	*
CHOW_03	male	GG	GG	II	TT	GG	GG	CC	DD	*
CHOW_04	male	GG	GG	II	TT	GG	GG	CC	DD
CHOW_05	female	GG	GG	II	TT	GG	GG	CC	DD	*
GSHP_01	male	AG	AG	II	TT	GG	GG	CC	ID	*
GSHP_02	female	GG	GG	II	TT	GG	GG	CC	DD	*	60
GSHP_03	female	GG	GG	II	AT	GG	GG	CC	DD	*
GSHP_04	male	GG	AG	II	AT	GG	GG	CC	DD	*
SPOO_01	male	GG	GG	ID	TT	GG	GG	CC	DD	*	60
SPOO_02	female	AG	GG	II	AT	GG	GG	CC	ID	*	54
SPOO_03	female	AA	GG	ID	TT	GG	GG	CC	II	*	40
SPOO_04	female	AG	GG	DD	TT	GG	GG	CC	ID		50
SPOO_05	male	AG	GG	II	TT	GG	GG	CC	ID	*
SAMO_01	female	GG	GG	II	TT	GG	GG	CC	DD	*	44.8
SAMO_02	male	GG	GG	II	TT	GG	GG	CC	DD	*
SAMO_03	male	GG	GG	II	TT	GG	GG	CC	DD	*
SAMO_04	female	GG	GG	II	TT	GG	GG	CC	DD	*	49.6
SAMO_05	female	GG	AG	II	TT	GG	GG	CC	DD
BOX-_01	female	GG	GG	II	AT	GG	GG	CC	DD	*
BOX-_02	female	GG	AG	ID	AA	GG	GG	CC	DD
BOX-_03	female	GG	GG	II	AA	GG	GG	CC	DD
BOX-_04	male	GG	GG	II	AA	GG	GG	CC	DD	*
BOX-_05	female	GG	GG	II	AA	GG	GG	CC	DD	*
BOX-_06	male	GG	GG	II	AA	GG	GG	CC	DD	*
BOX-_07	female	GG	GG	II	AA	GG	GG	CC	DD
COLL_01	female	GG	GG	II	TT	GG	GG	CC	DD	*
COLL_02	male	GG	GG	II	TT	GG	GG	CC	DD	*	65
COLL_03	male	GG	GG	II	TT	GG	GG	CC	DD	*	60
COLL_04	female	GG	GG	II	TT	GG	GG	CC	DD	*	53
AMST_01	male	AA	GG	II	TT	GG	GG	CC	II	*	76
AMST_02	female	AG	GG	II	TT	GG	GG	CC	ID	*	58
AMST_03	male	AA	GG	II	AT	GG	GG	CC	II	*	68
AMST_04	female	AA	GG	II	TT	GG	GG	CC	II	*
GOLD_01	female	AG	AA	II	TT	GG	GG	CC	ID	*
GOLD_02	female	GG	GG	II	AT	GG	GG	CC	DD	*	48
GOLD_03	male	GG	GG	II	TT	GG	GG	CC	DD	*
GOLD_04	male	GG	GG	II	TT	GG	GG	CC	DD	*	68
GREY_01	male	GG	GG	II	AT	GG	GG	CC	DD	*
GREY_02	female	GG	GG	II	AT	GG	GG	CC	DD	*	65
GREY_03	male	GG	GG	II	TT	GG	GG	CC	DD	*
GREY_04	female	GG	GG	II	TT	GG	GG	CC	DD	*	59.4
GREY_05	female	GG	GG	II	TT	GG	GG	CC	DD		64.4
OES-_01	male	GG	GG	II	TT	GG	GG	CC	DD	*
OES-_02	female	GG	GG	II	TT	GG	GG	CC	DD	*
OES-_03	female	AG	GG	II	TT	GG	GG	CC	ID	*
OES-_04	female	GG	GG	II	AT	GG	GG	CC	DD
OES-_05	male	AG	GG	ID	TT	GG	GG	CC	ID	*
CHBR_01	male	AG	GG	II	TT	GG	GG	CC	ID	*
CHBR_02	female	AA	GG	II	TT	GG	GG	CC	II	*	77
CHBR_03	female	GG	GG	II	TT	GG	GG	CC	DD	*
CHBR_04	male	AA	GG	II	TT	GG	GG	CC	II	*
LAB-_01	male	GG	AG	II	TT	GG	GG	CC	DD	*	62
LAB-_02	male	AG	GG	II	TT	GG	GG	CC	ID	*	82
LAB-_03	female	AG	AG	II	TT	GG	GG	CC	ID	*
LAB-_04	female	GG	GG	II	TT	GG	GG	CC	DD	*
FCR-_01	female	GG	AA	ID	TT	GG	GG	CC	DD	*
FCR-_02	female	GG	GG	ID	TT	GG	GG	CC	DD	*
FCR-_03	male	GG	GG	ID	TT	GG	GG	CC	DD	*
FCR-_04	female	AG	GG	II	TT	GG	GG	CC	ID
FCR-_05	male	GG	GG	II	TT	GG	GG	CC	DD	*
GSNZ_01	male	GG	GG	II	TT	GG	GG	CC	DD	*
GSNZ_02	male	GG	GG	II	TT	GG	GG	CC	DD	*
GSNZ_03	male	GG	GG	II	TT	GG	GG	CC	DD
GSNZ_04	female	GG	GG	II	TT	GG	GG	CC	DD	*
GSNZ_05	female	GG	GG	II	TT	GG	GG	CC	DD	*
BRIA_01	male	GG	AG	II	TT	GG	GG	CC	DD	*
BRIA_02	male	GG	AG	II	TT	GG	GG	CC	DD	*
BRIA_03	female	GG	GG	ID	TT	GG	GG	CC	DD	*
BRIA_04	female	GG	AG	II	TT	GG	GG	CC	DD
BRIA_05	male	GG	AG	II	TT	GG	GG	CC	DD
BRIA_06	female	GG	GG	II	TT	GG	GG	CC	DD	*
BRIA_07	female	GG	GG	II	TT	GG	GG	CC	DD
BEAU_01	male	GG	AG	ID	TT	GG	GG	CC	DD	*
BEAU_02	female	GG	GG	II	TT	GG	GG	CC	DD	*
BEAU_03	female	GG	GG	II	TT	GG	GG	CC	DD	*
BEAU_04	female	GG	GG	II	TT	GG	GG	CC	DD
BEAU_05	male	GG	GG	II	TT	GG	GG	CC	DD
BEAU_06	male	GG	GG	II	TT	GG	GG	CC	DD	*
BEAU_07	male	GG	GG	II	TT	GG	GG	CC	DD
DOBP_01	female	GG	GG	II	TT	GG	GG	CC	DD	*
DOBP_02	male	GG	GG	II	TT	GG	GG	CC	DD	*
DOBP_03	female	GG	GG	II	TT	GG	GG	CC	DD	*
DOBP_04	male	GG	GG	II	TT	GG	GG	CC	DD	*
DOBP_05	female	GG	GG	II	TT	GG	GG	CC	DD		61
BORZ_01	female	GG	GG	II	TT	GG	GG	CC	DD	*	83
BORZ_02	male	GG	GG	II	AT	GG	GG	CC	DD	*	88
BORZ_03	male	GG	GG	II	TT	GG	GG	CC	DD
BORZ_04	female	GG	GG	II	TT	GG	GG	CC	DD	*	80
BORZ_05	male	GG	GG	II	TT	GG	GG	CC	DD
BORZ_06	male	GG	GG	II	TT	GG	GG	CC	DD	*
BORZ_07	male	GG	GG	II	TT	GG	GG	CC	DD
BORZ_08	female	GG	GG	II	TT	GG	GG	CC	DD
GSD-_01	female	GG	AG	II	TT	GG	GG	CC	DD	*	80
GSD-_02	female	GG	GG	II	AT	GG	GG	CC	DD
GSD-_03	female	GG	GG	II	TT	GG	GG	CC	DD	*
GSD-_04	male	GG	GG	II	TT	GG	GG	CC	DD	*	93
GSD-_05	male	GG	AG	II	TT	GG	GG	CC	DD	*
GSD-_06	female	GG	AA	II	TT	GG	GG	CC	DD		74
BMD-_01	female	GG	GG	II	TT	GG	GG	CC	DD	*
BMD-_02	male	GG	AG	II	TT	GG	GG	CC	DD	*
BMD-_03	male	AG	AG	II	AT	GG	GG	CC	ID	*
BMD-_04	female	GG	GG	II	AT	GG	GG	CC	DD	*
BMD-_05	male	GG	AG	II	TT	GG	GG	CC	DD
BMD-_06	female	GG	AG	II	AT	GG	GG	CC	DD
DDBX_01	male	AA	GG	II	TT	GG	GG	CC	II	*
DDBX_02	female	AA	GG	II	TT	GG	GG	CC	II	*
DDBX_03	male	AG	GG	II	TT	GG	GG	CC	ID
DDBX_04	female	AG	GG	II	TT	GG	GG	CC	ID	*
DDBX_05	male	AG	GG	II	TT	GG	GG	CC	ID	*
DDBX_06	male	GG	GG	II	TT	GG	GG	CC	DD
AKIT_01	female	GG	GG	II	TT	GG	GG	CC	DD
AKIT_02	female	GG	GG	II	TT	GG	GG	CC	DD	*
AKIT_03	male	GG	GG	II	TT	GG	GG	CC	DD
AKIT_04	male	GG	GG	II	TT	GG	GG	CC	DD	*
AKIT_05	female	GG	GG	ID	TT	GG	GG	CC	DD
AKIT_06	male	GG	GG	II	TT	GG	GG	CC	DD
AKIT_07	male	GG	GG	II	TT	GG	GG	CC	DD	*
AKIT_08	female	GG	GG	II	TT	GG	GG	CC	DD	*
AKIT_09	male	GG	GG	II	TT	GG	GG	CC	DD
AKIT_10	male	GG	GG	II	AT	GG	GG	CC	DD
AKIT_11	female	GG	GG	II	TT	GG	GG	CC	DD
AKIT_12	female	GG	GG	II	TT	GG	GG	CC	DD		75
GPYR_01	male	GG	GG	II	TT	GG	GG	CC	DD	*	105
GPYR_02	male	GG	GG	II	AT	GG	GG	CC	DD
GPYR_03	male	GG	GG	II	TT	GG	GG	CC	DD	*
GPYR_04	female	GG	GG	II	AT	GG	GG	CC	DD	*
GPYR_05	female	GG	GG	II	TT	GG	GG	CC	DD
GPYR_06	female	GG	GG	II	TT	GG	GG	CC	DD	*
GPYR_07	male	GG	GG	II	TT	GG	GG	CC	DD
GPYR_08	female	GG	AG	II	TT	GG	GG	CC	DD
LEON_01	female	GG	GG	II	TT	GG	GG	CC	DD	*	115
LEON_02	female	GG	GG	II	AT	GG	GG	CC	DD	*	105
LEON_03	male	GG	GG	II	TT	GG	GG	CC	DD	*	100
LEON_04	male	GG	GG	II	TT	GG	GG	CC	DD
LEON_05	female	GG	GG	II	TT	GG	GG	CC	DD
LEON_06	male	GG	GG	II	TT	GG	GG	CC	DD	*	123
LEON_07	male	GG	GG	II	TT	GG	GG	CC	DD
KUVZ_01	male	GG	GG	II	TT	GG	GG	CC	DD	*	100.8
KUVZ_02	male	GG	GG	DD	TT	GG	GG	CC	DD		109.5
KUVZ_03	male	GG	GG	II	TT	GG	GG	CC	DD		100.5
KUVZ_04	male	GG	GG	II	AT	GG	GG	CC	DD	*	110
KUVZ_05	female	GG	GG	II	TT	GG	AG	CC	DD	*
KUVZ_06	male	GG	GG	II	TT	GG	GG	CC	DD		100
KUVZ_07	female	GG	GG	II	TT	GG	GG	CC	DD	*	104
KUVZ_08	female	AG	GG	II	TT	GG	GG	CC	ID
BLDH_01	male	GG	AG	II	TT	GG	GG	CC	DD	*
BLDH_02	male	GG	GG	II	TT	GG	GG	CC	DD	*
BLDH_03	female	GG	GG	II	TT	GG	GG	CC	DD	*
BLDH_04	male	GG	GG	II	TT	GG	GG	CC	DD
BLDH_05	female	GG	GG	ID	TT	GG	GG	CC	DD	*
BLDH_06	female	GG	GG	II	TT	GG	GG	CC	DD
ROTT_01	male	AG	GG	II	TT	GG	GG	CC	ID	*
ROTT_02	male	AA	GG	II	TT	GG	GG	CC	II
ROTT_03	male	AA	GG	II	TT	GG	GG	CC	II
ROTT_04	female	AA	GG	II	TT	GG	GG	CC	II	*
ROTT_05	male	AA	GG	II	TT	GG	GG	CC	II	*
ROTT_06	male	AA	GG	II	TT	GG	GG	CC	II		116.8
ROTT_07	female	AA	GG	II	TT	GG	GG	CC	II
ROTT_08	female	AA	GG	II	TT	GG	GG	CC	II
ROTT_09	female	AA	GG	II	TT	GG	GG	CC	II	*	90
ROTT_10	female	AA	GG	II	TT	GG	GG	CC	II		96.3
CNCS_01	male	GG	GG	II	TT	GG	GG	CC	DD	*
CNCS_02	female	GG	GG	II	TT	GG	GG	CC	DD	*
CNCS_03	male	GG	GG	II	TT	GG	GG	CC	DD	*
CNCS_04	female	GG	GG	II	TT	GG	GG	CC	DD	*
ANAT_01	female	AG	GG	II	TT	GG	GG	CC	ID	*
ANAT_02	female	GG	GG	II	TT	GG	GG	CC	DD	*
ANAT_03	male	GG	GG	II	TT	GG	GG	CC	DD	*
ANAT_04	male	GG	GG	II	TT	GG	GG	CC	DD	*
ANAT_05	male	GG	GG	II	TT	GG	GG	CC	DD
ANAT_06	female	GG	GG	II	TT	GG	GG	CC	DD
BULM_01	male	AG	GG	II	TT	GG	GG	CC	ID	*
BULM_02	female	AG	GG	II	TT	GG	GG	CC	ID	*
BULM_03	male	AG	GG	II	TT	GG	GG	CC	ID	*
BULM_04	female	GG	GG	II	TT	GG	GG	CC	DD
BULM_05	male	AG	GG	II	TT	GG	GG	CC	ID
BULM_06	female	GG	GG	II	TT	GG	GG	CC	DD	*
BULM_07	female	AG	GG	II	TT	GG	GG	CC	ID
BRTR_01	male	GG	GG	II	TT	GG	GG	CC	DD	*
BRTR_02	male	GG	GG	II	TT	GG	GG	CC	DD	*
BRTR_03	female	AG	GG	II	TT	GG	GG	CC	ID	*
BRTR_04	female	GG	GG	ID	TT	GG	GG	CC	DD	*
BRTR_05	male	AG	GG	II	TT	GG	GG	CC	ID
NEWF_01	female	GG	GG	II	TT	GG	GG	CC	DD	*
NEWF_02	male	GG	GG	II	TT	GG	GG	CC	DD	*
NEWF_03	female	GG	GG	II	TT	GG	GG	CC	DD
NEWF_04	male	GG	GG	II	TT	GG	GG	CC	DD		137
NEWF_05	female	GG	GG	II	TT	GG	GG	CC	DD	*
NEWF_06	female	GG	GG	II	TT	GG	GG	CC	DD
NEWF_07	male	GG	GG	II	TT	GG	GG	CC	DD	*
NEWF_08	male	GG	GG	II	TT	GG	GG	CC	DD		135
NEAP_01	female	GG	GG	II	TT	GG	GG	CC	DD	*
NEAP_02	male	GG	GG	ID	TT	GG	GG	CC	DD	*
NEAP_03	male	GG	GG	ID	TT	GG	GG	CC	DD	*
NEAP_04	female	GG	GG	II	TT	GG	GG	CC	DD
NEAP_05	female	GG	GG	II	TT	GG	GG	CC	DD	*
NEAP_06	male	GG	GG	II	TT	GG	GG	CC	DD
NEAP_07	female	GG	GG	II	TT	GG	GG	CC	DD
DANE_01	male	GG	GG	II	TT	GG	GG	CC	DD	*
DANE_02	female	GG	GG	II	TT	GG	GG	CC	DD	*
DANE_03	female	GG	GG	II	TT	GG	GG	CC	DD
DANE_04	female	GG	GG	II	TT	GG	GG	CC	DD	*
DANE_05	male	GG	GG	II	TT	GG	GG	CC	DD	*	170
DANE_06	male	GG	GG	ID	TT	GG	GG	CC	DD		130
DANE_07	female	GG	GG	II	TT	GG	GG	CC	DD
IWOF_01	male	GG	GG	II	TT	GG	GG	CC	DD	*
IWOF_02	male	GG	GG	II	TT	GG	GG	CC	DD
IWOF_03	male	GG	GG	II	TT	GG	GG	CC	DD	*
IWOF_04	male	GG	GG	II	TT	GG	GG	CC	DD
IWOF_05	female	GG	GG	II	TT	GG	GG	CC	DD	*
IWOF_06	female	GG	GG	II	TT	GG	GG	CC	DD
IWOF_07	female	GG	GG	II	TT	GG	GG	CC	DD
IWOF_08	female	GG	GG	II	TT	GG	GG	CC	DD	*
IWOF_09	female	GG	GG	II	TT	GG	GG	CC	DD
STBD_01	female	GG	GG	II	AT	GG	GG	CC	DD	*
STBD_02	female	GG	GG	II	TT	GG	GG	CC	DD
STBD_03	male	GG	GG	II	AT	GG	GG	CC	DD	*
STBD_04	male	GG	GG	II	TT	GG	GG	CC	DD
STBD_05	male	GG	GG	II	TT	GG	GG	CC	DD	*
STBD_06	female	GG	GG	II	AT	GG	GG	CC	DD
STBD_07	female	GG	GG	II	TT	GG	GG	CC	DD	*
STBD_08	female	GG	GG	II	TT	GG	GG	CC	DD
STBD_09	male	GG	GG	II	TT	GG	GG	CC	DD
TIBM_01	female	GG	GG	II	TT	GG	GG	CC	DD	*
TIBM_02	male	GG	GG	II	TT	GG	GG	CC	DD	*
TIBM_03	female	GG	GG	II	TT	GG	GG	CC	DD
TIBM_04	female	AG	GG	II	TT	GG	GG	CC	ID	*
TIBM_05	male	GG	GG	II	TT	GG	GG	CC	DD	*
TIBM_06	female	GG	GG	II	TT	GG	GG	CC	DD
MAST_01	female	GG	GG	II	TT	GG	GG	CC	DD
MAST_02	male	GG	GG	II	TT	GG	GG	CC	DD	*
MAST_03	male	GG	GG	II	TT	GG	GG	CC	DD
MAST_04	female	AG	GG	II	TT	GG	GG	CC	ID	*	169
MAST_05	female	GG	GG	II	TT	GG	GG	CC	DD
MAST_06	male	GG	GG	II	TT	GG	GG	CC	DD		197
MAST_07	male	GG	GG	II	TT	GG	GG	CC	DD	*
MAST_08	female	GG	GG	II	TT	GG	GG	CC	DD
MAST_09	female	AG	GG	II	TT	GG	GG	CC	ID	*
MAST_10	male	GG	GG	II	TT	GG	GG	CC	DD
MAST_11	female	AG	GG	II	TT	GG	GG	CC	ID
MAST_12	female	GG	GG	II	TT	GG	GG	CC	DD
