# Supplementary material for: Derived variants at six genes explain nearly half of size reduction in dog breeds
Source: HighWire-hosted journal article supplement (doi:10.1101/gr.157339.113), 2013-09-11
Supplement: Supplemental_TableS8.xlsx [file Supplemental_TableS8.xlsx]

## Sheet: Table_S8
Supplemental Table S8. PCR conditions and primers used to genotype the most highly associated markers.
Primers for HMGA2 contain M13 tags.
Marker name	Marker position	Forward primer sequence	Reverse primer sequence	Polymerase	Amplicon length (bp)	PCR conditions
STC2	chr4:39,182,836	ATACAATCCACCTAGTGTCCCCAACCAT	GGCCACAGCCCCTTTAAT	AmpliTaq Gold DNA polymerase	399	94°C, 10 min; 20 x (94°C, 30 s; 65°C, 30 sec (-0.5°C per cycle); 72°C, 1 min); 20 x (94°C, 30 s; 55°C, 30 s; 72°C, 1 min); 72°C, 10 min
GHR(1) and GHR(2)	chr4:67,040,898 chr4:67,040,939	GCTCTCCGTTAAATCAAGCTG	AAGGAGAGAGGTGTTGTTGGT	AmpliTaq Gold DNA polymerase	317	95°C, 5 min; 30 x (94°C, 30 s; 58°C, 30 s; 72°C, 1 min); 72°C, 10 min
SMAD2	chr7:43,794,129	GGAAGCCTTAGGGGATTTTG	CTCCACCACCCACAGAAACT	AmpliTaq Gold DNA polymerase	683	95°C, 5 min; 30 x (94°C, 30 s; 60°C, 30 s; 72°C, 1 min); 72°C, 10 min
SMAD2 (deletion)	chr7:43,794,129 (deletion)	GGCATGGGAGAGTGACCTAA	GAGCAGCCTGTGAAGGAAAC	AmpliTaq Gold DNA polymerase	440	95°C, 5 min; 30 x (94°C, 30 s; 60°C, 30 s; 72°C, 1 min); 72°C, 10 min
HMGA2	chr10:8,348,804	tgtaaaacgacggccagtCACACACACACACTCACTCACA	caggaaacagctatgaccAGTCAGAAGGCAAGAGGAGGA	KOD DNA polymerase	264	94°C, 2 min; 35 x (98°C, 10 s; 68°C, 2 min); 72°C, 10 min
IGF1R	chr3:41,849,479	AGATGACCAACCTCAAGGATATT	AGTCCTGCCATCCCACAAAG	AmpliTaq Gold DNA polymerase	700	94°C, 10 min; 20 x (94°C, 30 s; 65°C, 30 sec (-0.5°C per cycle); 72°C, 1 min); 20 x (94°C, 30 s; 55°C, 30 s; 72°C, 1 min); 72°C, 10 min
IGF1	chr15:41,221,438	ACTAGTTTGGCTGCTTCACTGC	AGCAGCCATTACCTGTGGTAGA	AmpliTaq Gold DNA polymerase	642	95°C, 5 min; 30 x (94°C, 30 s; 60°C, 30 s; 72°C, 1 min); 72°C, 10 min
IGF1 SINE	chr15:41,220,980	CACTGATCCAGAAGAATCCAACT	CAAAGAACCATGTAAGCCTATTTGT	AmpliTaq Gold DNA polymerase	684 SINE insertion : 891	95°C, 5 min; 30 x (94°C, 30 s; 60°C, 30 s; 72°C, 1 min); 72°C, 10 min
