# Supplementary material for: Derived variants at six genes explain nearly half of size reduction in dog breeds
Source: HighWire-hosted journal article supplement (doi:10.1101/gr.157339.113), 2013-09-11
Supplement: Supplemental_TableS9.xlsx [file Supplemental_TableS9.xlsx]

## Sheet: Table_S9
Table S9. Average principal components (PCs) from genome-wide SNP profiles for each of the 65 breeds present in both our data set and the CanMap data set
Breed	PC1	PC2	PC3	PC4	PC5	PC6	PC7	PC8	PC9	PC10	PC11	PC12	PC13	PC14	PC15	PC16	PC17	PC18	PC19	PC20
AFGH	0.0479167	-0.009925	-0.000625	-0.0326583	-0.00656667	0.0176167	-0.08025	-0.0965333	-0.14325	-0.0555917	0.0585167	0.036275	0.079375	-0.0124417	0.050475	-0.0298917	0.0143167	0.008925	-0.0197333	0.00489167
AKIT	0.14575	0.0535667	-0.0039	0.00871667	0.0017	-0.00528333	0.03925	0.044825	0.0392	0.0166	-0.0356917	0.0024	-0.03935	-0.01865	0.069875	-0.136808	-0.00275	-0.0108583	-0.0212583	0.003125
AUST	-0.00962727	-0.00710909	0.0130909	0.0131273	-0.00505455	0.0114455	-0.00835455	-0.00313636	0.0117818	0.00980909	0.00156364	0.00522727	-0.00134545	0.0127	-0.00722727	-0.00616364	0.0094	-0.0437	-0.00682727	0.0120909
BASS	-0.00873333	-0.0317333	0.00804444	-0.00472222	0.0109111	0.0140111	-0.00815556	-0.0312667	0.0640444	-0.0363444	-0.0923556	0.0460111	0.0436111	-0.0126111	-0.000688889	-0.0108778	-0.0188	-0.0021	-0.0114222	-0.00773333
BEAG	-0.00483333	-0.0256222	0.00864444	0.000155556	0.00314444	0.00515556	-0.00856667	-0.0210889	0.0281333	-0.0236222	-0.0503111	0.0339667	0.0213222	0.000344444	-0.00508889	-0.0063	-0.0100222	-0.00921111	-0.00476667	0.0113
BLDH	-0.01135	-0.029325	0.009075	-0.015425	0.00995	0.008275	-0.0453375	-0.0710875	0.09165	-0.074775	-0.1769	0.1135	0.04015	-0.034225	-0.0410125	0.0001	-0.0746	0.0234125	-0.02345	0.0728625
BMD-	-0.0107364	-0.0029	0.0111	-0.0140818	0.00771818	0.000554545	-0.0178636	-0.0103	-0.0139	-0.00425455	-0.0150636	-0.151882	0.0187545	-0.169455	-0.124573	-0.0653091	0.0480364	-0.0172909	0.0278727	0.0962818
BORZ	0.002325	-0.00774167	-0.01885	-0.0512417	-0.0305667	0.0043	-0.0174167	-0.0294667	-0.0635417	0.0393167	-0.00149167	0.0242833	-0.0431917	-0.0106167	-0.00784167	-0.00284167	-0.0212667	0.0110667	0.00431667	0.007825
BOST	-0.0302833	0.0601	0.00726667	0.00888333	0.00163333	0.00553333	0.000333333	0.00766667	0.00533333	0.0334167	0.00148333	-0.00121667	0.0473667	0.00393333	0.00656667	0.000683333	-0.00575	0.00428333	-0.000316667	0.00118333
BRIA	-0.00921818	-0.0162909	0.00432727	-0.0142182	-0.00197273	0.0043	-0.00548182	-0.00360909	-0.00480909	0.0186909	-0.00501818	-0.0118455	-0.00821818	0.0104636	-0.00463636	-0.00530909	-0.00316364	0.00492727	0.0184818	-0.00561818
BRIT	-0.00676667	-0.0304833	0.01425	-0.000933333	0.0164833	0.00256667	-0.00135	0.00596667	0.00685	-0.00163333	-0.00446667	-0.0102167	-0.00871667	0.00811667	0.00501667	-0.00331667	0.00255	-0.00825	0.0165167	0.00175
BRUS	-0.00507143	-0.0224	0.0182286	0.00385714	0.0122857	0.00622857	0.0111	-0.00907143	0.00658571	0.0177429	0.0170857	-0.00645714	-0.00601429	0.00248571	0.0016	0.00538571	0.0061	-0.0241714	-0.0001	-0.0045
BULD	-0.0441667	0.112267	0.0117333	0.01725	0.0134667	-0.0157167	-0.00208333	-0.000983333	0.00478333	0.0506833	0.00733333	0.00311667	0.0653667	0.0133167	0.00721667	-0.006	-0.00405	0.0068	0.00328333	0.0148833
BULM	-0.0396917	0.09365	0.0221667	-0.015525	0.044325	-0.129608	0.00831667	-0.0293167	-0.00879167	-0.0391	0.012775	0.0245417	-0.049625	0.02005	-0.009475	-0.00396667	0.015975	-0.015075	0.009625	0.0392083
CAIR	-0.00949167	-0.0133167	0.00576667	0.066925	-0.0871417	-0.0309917	0.00319167	0.00596667	-0.01085	-0.00840833	-0.00504167	0.00276667	0.00139167	-0.00456667	0.00171667	2.5e-05	0.00159167	-0.0105583	-0.00549167	-0.00339167
CARD	-0.01214	-0.01096	-0.03969	0.01298	0.00901	0.00628	-0.00196	0.00033	0.00901	0.00604	-0.00313	0.00772	-0.00314	0.0101	0.00342	-0.00348	0.079	0.04199	-0.00885	0.00687
CHIH	0.00424444	-0.0144111	0.00837778	0.00171111	0.00276667	0.00396667	-0.00698889	-0.00865556	0.00558889	0.000711111	0.00786667	-0.000544444	0.000855556	0.00213333	-0.000111111	0.00133333	0.0037	-0.00432222	0.00463333	-0.00414444
CHOW	0.1363	0.04359	-0.00109	0.00252	-0.00066	-0.00098	0.01703	0.01575	0.01426	-0.00239	-0.00325	0.00727	-0.00347	-0.02234	0.02343	-0.03226	-0.0114	-0.00453	-0.0031	0.00142
CKCS	-0.0140417	-0.056575	0.0811833	0.03955	0.07515	0.0102083	0.2095	-0.009475	-0.0957	0.0139333	-0.002825	0.0331833	0.0224083	-0.0439083	-0.000875	0.003925	-0.0355583	0.0405417	-0.0121	0.0139833
COLL	-0.0109556	-0.0306111	-0.184878	0.0490778	0.0585	-0.0218	0.0234	-0.00297778	-0.00506667	-0.0131444	0.00796667	-0.00984444	0.0148	-0.00988889	0.00297778	0.00208889	-0.0470556	-0.00888889	-0.00524444	-0.0103111
DANE	-0.0179273	0.00880909	0.00160909	-0.0507909	-0.0164273	-0.00457273	0.0103545	-0.00316364	0.00678182	-0.0241727	-0.0132091	-0.0476364	0.0137091	-0.0142	0.0157364	0.0141273	-0.0066	-0.00370909	-0.0314636	-0.0449
ECKR	-0.0112167	-0.0340167	0.04315	0.00433333	0.0345667	0.0124333	0.02425	0.00653333	0.0180833	0.00233333	-0.01185	0.00706667	-0.00901667	0.0244	0.0226667	-0.0164667	0.0182	0.0166333	0.0653667	-0.0400667
ESSP	-0.00845	-0.029475	0.0295667	0.00664167	0.0253833	0.002325	0.0125917	0.003275	0.00824167	-0.0012	-0.00389167	0.00291667	0.00228333	0.01985	0.00871667	-0.00666667	0.0124083	0.00975	0.0182167	-0.0124167
FBUL	-0.0366917	0.0854083	0.01125	0.0189333	0.006	0.00830833	-0.0148583	0.00145833	0.022175	0.106875	0.005175	-0.00231667	0.140492	0.0153083	0.0269833	-0.00621667	-0.0348333	0.03155	0.00564167	0.00213333
FCR-	-0.0175667	-0.0138667	0.0296583	-0.011275	0.0437583	-0.00459167	-0.0713833	0.1956	-0.0396417	-0.052875	0.030025	0.054025	0.0184333	-0.0418667	0.004225	-0.0026	-0.0408833	-0.0199333	-0.00393333	0.013075
GLEN	-0.0257556	0.0412333	0.00264444	0.023	-0.0103222	0.0196889	6.66667e-05	0.00558889	0.0104444	0.0252556	0.0150444	-0.0149556	0.0404778	0.0161667	-0.00266667	-0.00252222	-0.0201444	-0.0150889	-0.0174111	0.0132111
GOLD	-0.0140182	-0.0118545	0.0180273	-0.00115455	0.0287636	-0.000772727	-0.0408818	0.0916364	-0.0256545	-0.0311727	0.00958182	0.00713636	-0.00758182	-0.0154455	-0.00798182	0.0163364	0.00154545	0.0162273	0.00450909	-0.0325
GREY	-0.0257333	0.005775	-0.0352917	-0.0672667	-0.0413167	0.0104083	0.00631667	0.0152667	-0.0305833	0.077675	-0.01885	0.0435	-0.0585417	-0.0148333	-0.0214417	-0.00214167	-0.0163417	0.0122	-0.012925	-0.0045
GSHP	-0.00555455	-0.0273727	0.0178909	-0.00301818	0.0117909	0.00265455	-0.00895455	-0.00803636	0.0107273	-0.00409091	-0.00807273	-0.00533636	-0.00708182	0.0139636	0.0134727	-0.0105182	0.00166364	-0.00800909	0.0167182	-0.00985455
GSNZ	-0.00591	-0.01282	0.00799	-0.00454	0.00048	0.00716	-0.00907	-0.00573	0.01619	0.00245	0.00658	-0.02125	-0.00871	0.01928	0.01746	0.01239	-0.00119	-0.01416	0.00472	-0.0072
HAVA	-0.0013	-0.0224625	0.0142625	0.002425	0.0056375	0.0067	-0.005475	-0.00975	0.0083375	-0.0002625	0.0072	-0.008875	-0.0029625	0.0114375	-0.00245	-0.0019375	0.0050875	-0.0060875	0.011	0.0017625
HUSK	0.110744	0.0292889	-0.0103333	-0.000211111	0.003	0.0014	0.0104222	0.0103889	-0.0311667	-0.00574444	-0.0486889	-0.0278889	0.0202778	0.0551222	-0.0827	0.1286	0.00606667	0.00976667	0.0255667	0.00207778
IBIZ	0.00034	-0.0217	0.00359	-0.01412	0.00208	0.01116	-0.02279	-0.01685	-0.01204	0.00331	0.00931	-0.00115	-0.01165	0.00186	0.00445	-0.00418	0.00175	-0.00192	0.00984	-0.00845
ITGY	-0.00789	-0.01469	-0.01068	-0.03508	-0.02209	0.00922	-0.00325	-0.00723	-0.01564	0.05928	-0.00526	0.03017	-0.05504	-0.0047	-0.02531	-0.00997	-0.0003	-0.00728	0.00067	-0.0178
IWOF	-0.0225154	0.00798462	-0.0420923	-0.159408	-0.100785	0.0131769	0.111792	0.0402385	0.047	-0.0900615	0.0436	-0.0119538	0.0682462	0.0281846	0.00817692	-0.00554615	0.00919231	-0.0126462	0.0268077	0.0121846
IWSP	-0.0126818	-0.0191909	0.0226182	0.000109091	0.0141455	0.00744545	-0.00579091	0.0245455	-0.000290909	-0.00941818	0.000736364	-0.00123636	-0.00439091	0.0330182	0.00405455	-9.09091e-05	0.0189818	0.0199273	0.0112	-0.00381818
KUVZ	0.00281667	-0.0106417	0.00141667	-0.0126417	-0.00113333	0.00735833	-0.00925833	-0.0165583	-0.008925	0.000275	0.00665	-0.005475	0.00434167	-0.00365	0.00605833	0.00301667	-0.00165	-0.006675	-0.00119167	-0.002825
LAB-	-0.01365	-0.00796	0.01614	-0.00206	0.01611	-0.00217	-0.02023	0.05845	-0.00908	-0.00533	0.00034	0.01219	-0.00159	0.00455	0.00292	0.00438	0.00314	-0.00039	0.00552	-0.00622
MAST	-0.0361083	0.08505	0.0177833	-0.0235583	0.0474583	-0.139175	0.00936667	-0.0385333	-0.0110583	-0.0539833	0.00629167	0.015825	-0.0559333	0.023825	-0.00908333	-0.00226667	0.008975	-0.00149167	-0.00235833	0.0138083
MBLT	-0.0473125	0.124275	-0.009475	0.0639375	-0.00455	0.18235	0.0160625	-0.0246125	-0.0138	-0.112325	0.012325	0.005725	-0.101837	-0.0140875	-0.0037	0.0090875	-0.010075	0.0076625	0.0105125	-0.015225
MPIN	-0.00648333	-0.0195	0.025725	0.009025	0.0158917	0.0182	0.0178083	-0.0163417	0.0112417	0.0133417	0.0124333	-0.0129	-0.00326667	0.0317917	-0.019025	-0.000741667	0.060075	-0.179575	-0.126342	-0.0371333
NEWF	-0.0126364	0.000972727	0.0111727	-0.00842727	0.0134091	-0.00983636	-0.0304364	0.0423909	-0.00964545	-0.00783636	-0.0303727	-0.0132182	-0.00286364	-0.0104273	-0.00997273	0.0147455	-0.0106636	0.0128182	-0.038	-0.0249273
NOWT	-0.01115	-0.004575	0.008125	0.0516875	-0.05405	-0.01925	-0.000625	0.0053625	0.0103125	0.0129	0.0099875	0.0091	0.0062875	0.0198375	0.0103125	0.0038625	0.0096375	-0.0393	-0.0286375	0.0021875
OES-	-0.0132	-0.000183333	-0.01965	-0.00345833	0.00233333	0.015175	-0.008225	0.00965833	0.00133333	0.0342667	-0.010425	0.0206417	-0.00935	0.00890833	-0.00814167	-0.00238333	0.0078	-0.0203917	-0.0107917	0.029825
PAPI	-0.00576364	-0.0152727	0.0117636	0.00616364	0.00556364	0.00368182	-0.00153636	-0.0108091	0.00792727	0.0120727	0.0107364	-0.00525455	0.00533636	0.00852727	-0.00238182	0.00118182	0.00849091	-0.0195455	0.00499091	-0.00752727
PBGV	-0.00581667	-0.028475	0.0146333	-0.00113333	0.006525	0.00946667	-0.0103167	-0.0156333	0.02325	-0.0223583	-0.03035	0.0266167	0.012075	0.000525	0.0102083	-0.00395833	0.00229167	-0.018275	0.0162583	0.008775
PEKE	0.0442	-0.0144778	0.0179889	0.00922222	0.00542222	-0.0083	-0.00863333	-0.0386	0.1167	0.0186111	0.151822	0.0585667	-0.0203222	-0.0891111	-0.0288556	0.0712333	-0.0191778	0.0377222	-0.00124444	-0.00971111
PEMB	-0.0112917	-0.01615	-0.0591667	0.0233167	0.015975	0.00793333	0.0038	0.0248083	0.0177667	0.003675	-0.012225	0.0306333	0.00246667	0.0142833	0.0185417	-0.0112167	0.202758	0.116742	-0.020975	0.0291667
POM-	0.00396	-0.01541	0.00349	0.00217	0.00489	0.00389	-0.01084	-0.01207	0.00735	0.00631	0.01479	-0.00913	-0.00383	0.00948	-0.00573	0.00631	0.01782	-0.01877	0.00478	-0.00853
ROTT	-0.0115727	-0.0110909	0.00770909	-0.0297909	0.0102	0.000154545	-0.0136091	-0.00747273	0.0093	0.0185636	-0.0410818	-0.102209	-0.0510727	-0.0534091	0.203945	0.123055	-0.0214727	-0.000327273	-0.0103909	0.0822455
SALU	0.03732	-0.0083	-0.00266	-0.02544	-0.00483	0.01054	-0.04205	-0.05759	-0.08329	-0.0215	0.02742	0.02358	0.03686	0.00288	0.01376	-0.01189	-0.00275	0.01017	-0.00283	0.00047
SAMO	0.0434167	0.00181667	-0.00358333	-0.00715	0.00141667	0.002	-0.00806667	-0.00601667	-0.0149167	-0.00355	-0.0018	-0.0125833	0.00931667	0.0121667	-0.02145	0.02835	0.00875	-0.0109	0.00546667	-0.00153333
SCOT	-0.0100778	-0.0171111	0.0106667	0.1034	-0.148556	-0.0579778	0.00778889	0.0110222	-0.0254222	-0.0225889	0.00547778	0.00187778	-0.0134111	-0.00566667	0.0168778	0.0063	-0.0171	0.0307333	0.0281222	0.0145556
SHAR	0.102871	0.0465429	0.000228571	0.00325714	0.00454286	-0.00362857	0.0119	0.0102286	0.0115	0.00547143	0.00114286	0.0146571	0.00175714	-0.0141286	0.0201714	-0.0224143	-0.00352857	-0.00467143	0.000342857	-0.000714286
SHIH	0.0393111	-0.0125667	0.0182222	0.00286667	0.00638889	-0.00365556	-0.00471111	-0.0307778	0.0941111	0.0077	0.123322	0.0566333	-0.00775556	-0.0739778	-0.0242556	0.0629778	-0.0149778	0.0213	-0.00378889	0.00365556
SPOO	0.00601818	-0.0481909	0.0234636	-0.00301818	0.00714545	0.0181091	-0.0235909	-0.000190909	0.0240818	-0.00678182	0.0577909	-0.0833091	-0.0437	0.138945	-0.0449091	-0.0658818	-0.0952364	0.0996818	-0.0833273	0.0940273
SSHP	-0.010725	-0.0281167	-0.174167	0.0499	0.0603167	-0.0260167	0.0241667	0.001475	-0.00645833	-0.01665	0.0223583	-0.0117417	0.0137833	-0.00265833	0.00273333	-0.0044	-0.0613333	-0.0389833	0.0121417	0.00305
SSNZ	-0.00213333	-0.0157222	0.00587778	0.00341111	-0.000766667	0.00146667	-0.00815556	-0.0142111	0.00628889	0.00732222	0.0103444	-0.0194444	-0.00724444	0.0223556	0.00616667	0.00534444	0.0123111	-0.0208667	-0.00145556	0.00595556
STAF	-0.037375	0.0808917	0.00575	0.0259583	0.00465	0.0421917	-0.000166667	0.00678333	0.00901667	0.0410083	0.00606667	-0.0138833	0.0554833	0.00853333	-0.007525	-0.004925	-0.0127667	0.002975	0.0110583	0.014575
STBD	-0.0155833	0.00940833	0.00231667	-0.022375	0.00714167	-0.0345333	-0.0116083	-0.0217333	0.0143667	-0.0155083	-0.0324333	-0.077625	-0.000766667	-0.0460167	-0.00643333	-0.0150833	-0.02925	0.0908167	-0.0696667	-0.200192
SUSX	-0.0084	-0.035225	0.024325	0.0104	0.02575	0.00635	0.01055	0.00325	0.020975	0.007175	-0.00915	-0.005725	-0.0042	0.01735	0.02865	0.00265	0.02755	0.018575	0.0197	-0.013375
TPOO	-0.00165833	-0.0229833	0.0151917	0.0052	0.00433333	0.0068	-0.00771667	-0.00676667	0.0104917	0.00224167	0.0107083	-0.018125	-0.0125167	0.026225	-0.00625	-0.0118167	-0.0102333	0.00156667	-0.000191667	0.00905833
WHIP	-0.0261167	0.01045	-0.0326167	-0.0575417	-0.0404833	0.0159917	0.003475	0.00834167	-0.036025	0.107317	-0.0284417	0.0592083	-0.0789583	-0.02695	-0.02835	-0.005025	-0.0232	0.00315	-0.00415833	0.00364167
WHWT	-0.0102	-0.0193818	0.00529091	0.100827	-0.137845	-0.0561091	0.00919091	0.0142091	-0.0172091	-0.0254455	-0.0138909	-0.00289091	0.00392727	-0.0222636	-0.00126364	-0.00227273	-0.0132182	-0.00227273	-0.00836364	-0.00605455
YORK	-0.00912857	-0.00765714	0.00771429	0.0143571	-0.0001	0.0074	-0.00648571	-0.00248571	0.0136286	0.0115571	0.00675714	-0.000871429	0.0021	0.0134714	-0.00154286	0.0029	0.0131429	-0.0226429	-0.00511429	0.00458571
