# Supplementary figures and images for: Derived variants at six genes explain nearly half of size reduction in dog breeds
Source: HighWire-hosted journal article supplement (doi:10.1101/gr.157339.113), 2013-09-11

Supplemental Fig. S3

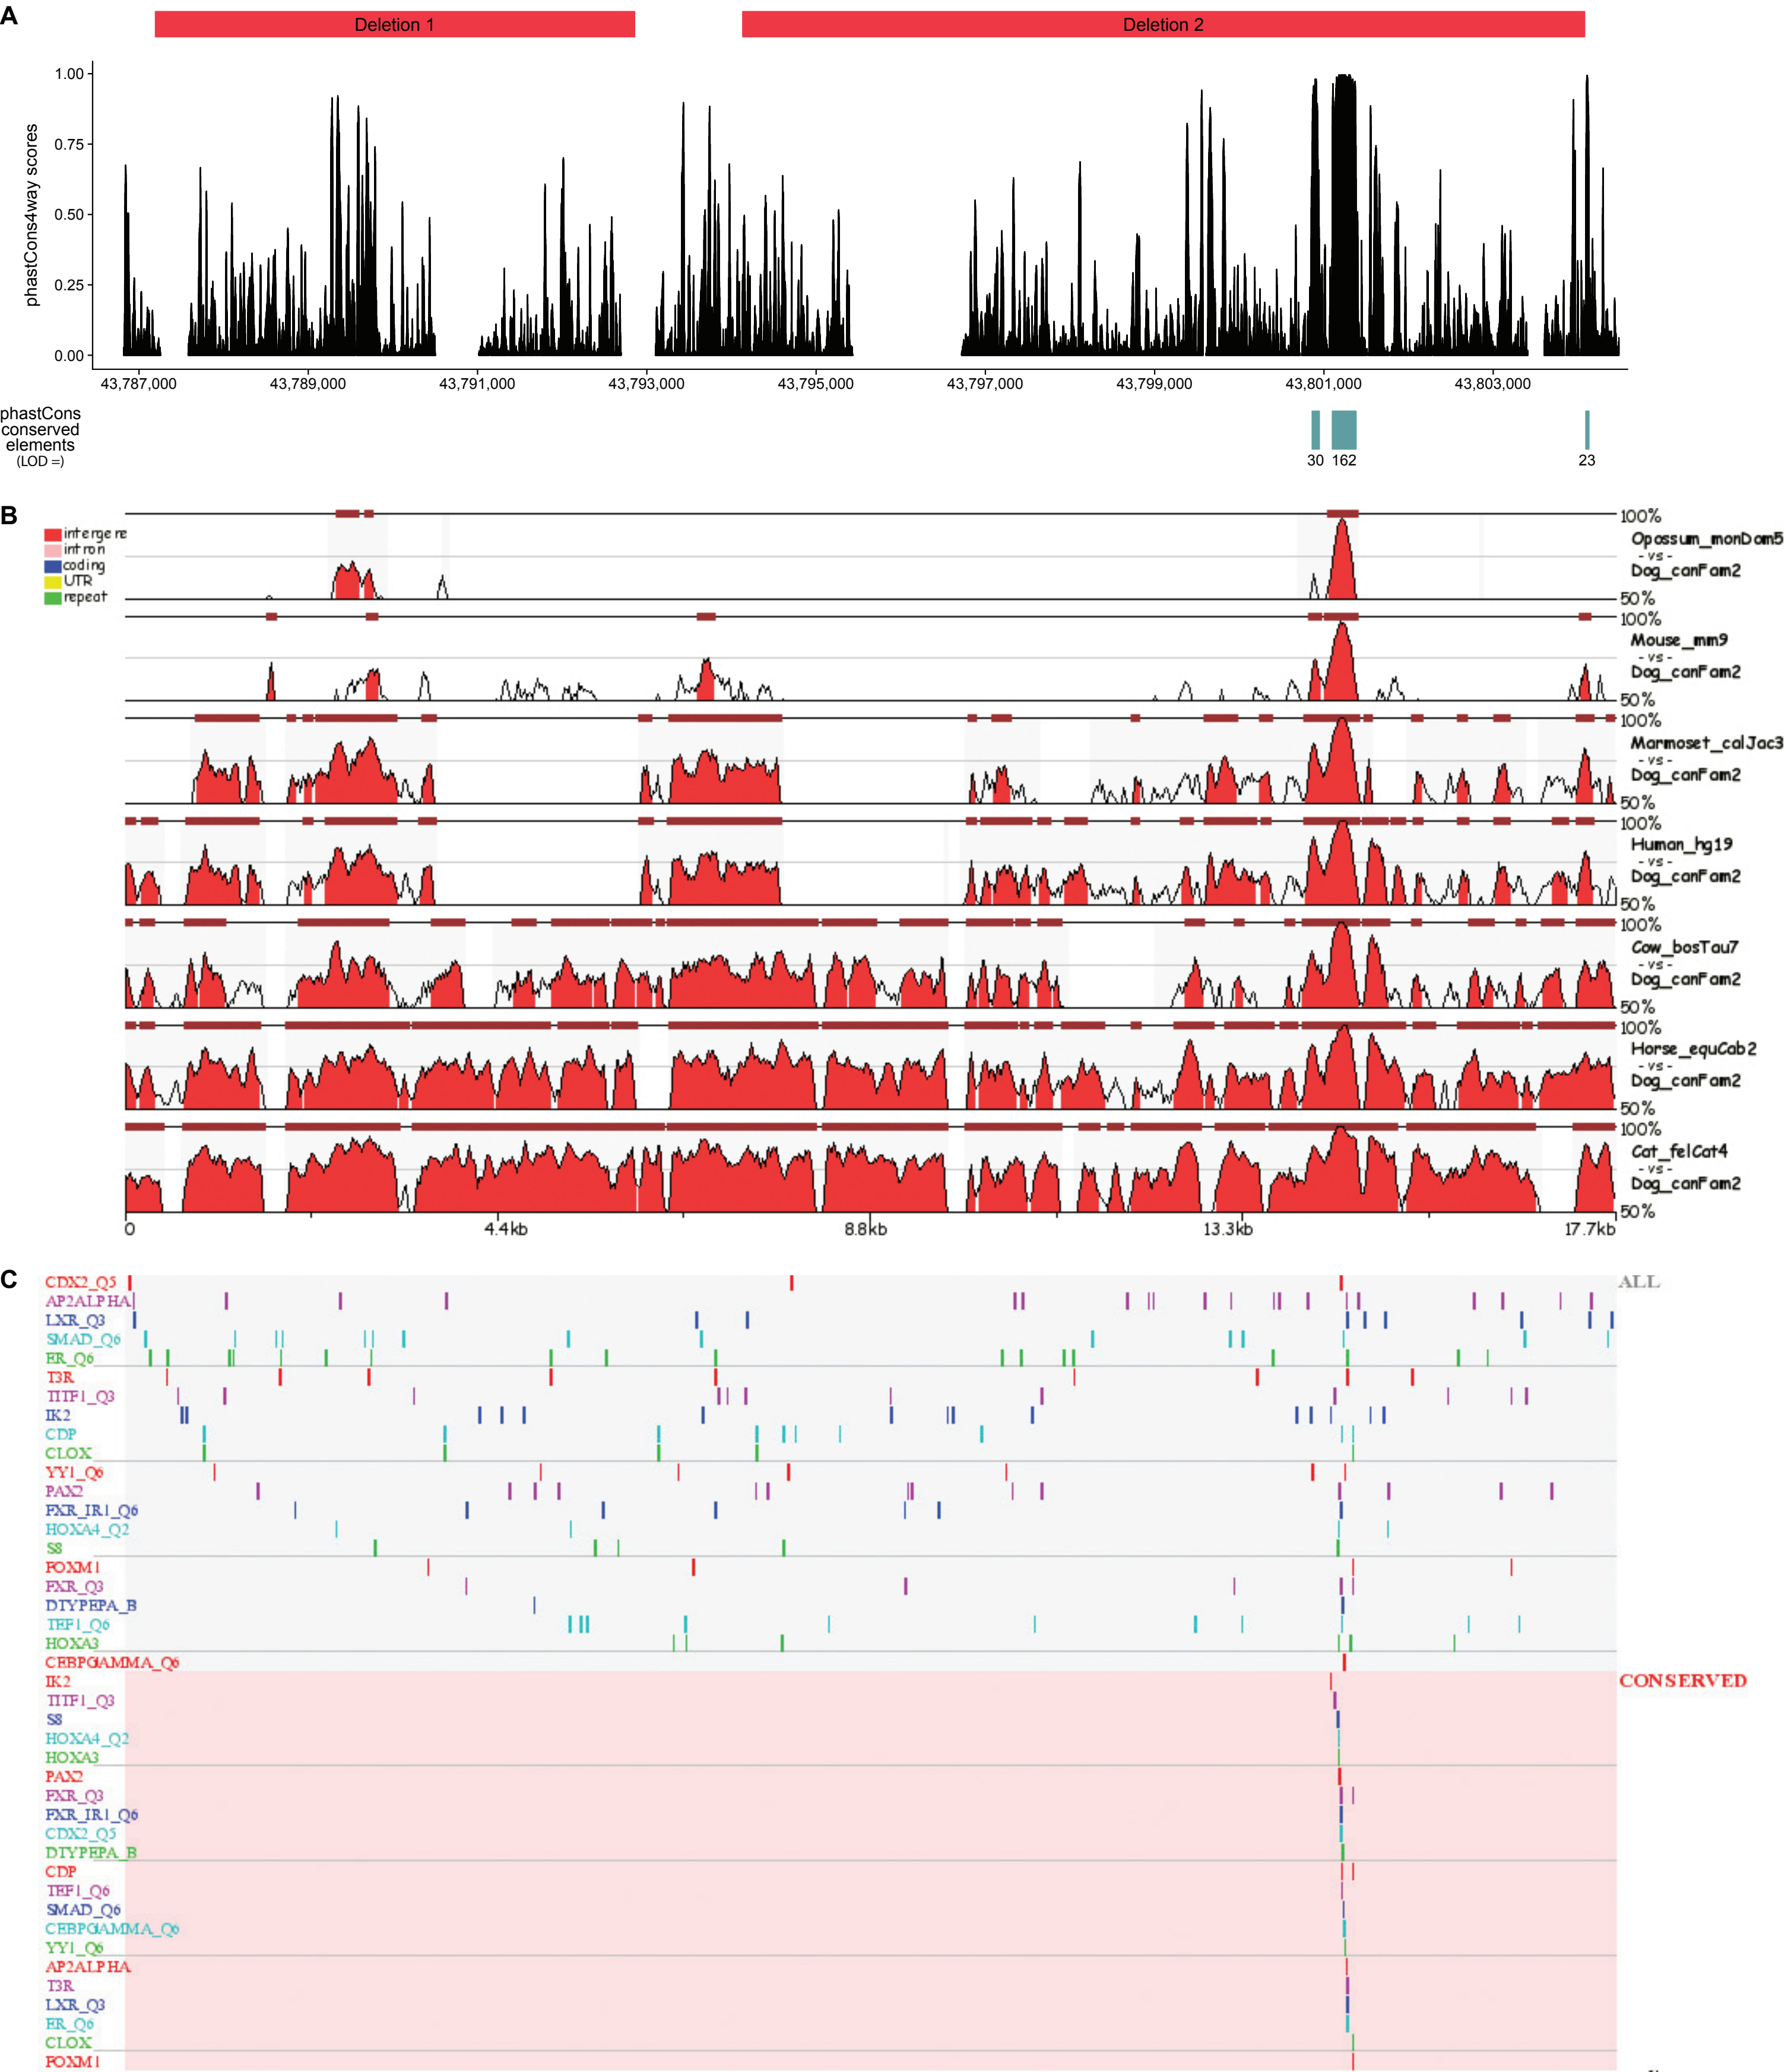

Supplement: Supplemental_FigureS3.pdf [file Supplemental_FigureS3.pdf]
